# Supplementary material for: Structure and stability of neutral Al–Mg nanoclusters up to 55 atoms
Source: Royal Society of Chemistry journal article supplement (doi:10.1039/c6cp05605a), 2016-01-01
Supplement: c6cp05605a1.pdf [file c6cp05605a1.pdf]

# Structure and stability of neutral Al-Mg nanoclusters up to 55 atoms

M. A. M. Paiva, B. M. T. C. Peluzo, J. C. Belchior and B. R. L. Galvão

Supplementary Information

*In this supplementary information, the putative global minima for each composition of  $Al_xMg_y$  neutral cluster are given using Cartesian coordinates (in angstroms).*

*In **Part I**, the results come from a genetic algorithm exploration of the Gupta empirical potential, and **Part II** gives the results after DFT re-optimizations. Only the lowest isomers are reported in each case, and thus the geometries given in Part II, may not necessarily be the result of an optimization of the corresponding cluster from Part I.*

# **Part I**

Structures obtained at the GA/Gupta level

|        |           |           |           |
|--------|-----------|-----------|-----------|
| 2      |           |           |           |
| Al0Mg2 |           |           |           |
| Mg     | 1.452757  | 0.836027  | -0.010701 |
| Mg     | -1.452757 | -0.836027 | 0.010701  |
| 2      |           |           |           |
| Al1Mg1 |           |           |           |
| Al     | -0.360395 | -0.766127 | 1.172494  |
| Mg     | 0.360395  | 0.766127  | -1.172494 |
| 2      |           |           |           |
| Al2Mg0 |           |           |           |
| Al     | -0.419335 | -0.243332 | -1.056502 |
| Al     | 0.419335  | 0.243332  | 1.056502  |
| 3      |           |           |           |
| Al0Mg3 |           |           |           |
| Mg     | 1.527245  | -0.565457 | -1.126866 |
| Mg     | -0.706653 | 1.844512  | -0.143052 |
| Mg     | -0.820592 | -1.279055 | 1.269919  |
| 3      |           |           |           |
| Al1Mg2 |           |           |           |
| Al     | 0.487234  | -0.791848 | 1.187817  |
| Mg     | -1.896474 | 0.662713  | 0.261934  |
| Mg     | 1.409239  | 0.129135  | -1.449751 |
| 3      |           |           |           |
| Al2Mg1 |           |           |           |
| Al     | -0.097754 | 1.233478  | 0.870533  |
| Al     | 1.225902  | -0.685807 | 0.561859  |
| Mg     | -1.128148 | -0.547671 | -1.432392 |
| 3      |           |           |           |
| Al3Mg0 |           |           |           |
| Al     | -0.572105 | -1.223351 | -0.488823 |
| Al     | -0.311961 | 0.459788  | 1.324431  |
| Al     | 0.884065  | 0.763564  | -0.835607 |
| 4      |           |           |           |
| Al0Mg4 |           |           |           |
| Mg     | 1.189398  | -0.044927 | -1.764519 |
| Mg     | -2.050484 | -0.234351 | -0.520392 |
| Mg     | 0.271802  | 1.863638  | 0.991560  |
| Mg     | 0.589284  | -1.584361 | 1.293352  |
| 4      |           |           |           |
| Al1Mg3 |           |           |           |
| Al     | 0.337392  | 1.292499  | -0.722208 |
| Mg     | 1.142916  | -1.532943 | -1.145181 |
| Mg     | -2.215663 | -0.130169 | -0.203724 |
| Mg     | 0.735354  | 0.370613  | 2.071113  |
| 4      |           |           |           |
| Al2Mg2 |           |           |           |
| Al     | -1.514149 | -0.170865 | 0.466826  |
| Al     | 0.414144  | -1.529689 | 0.168235  |
| Mg     | 0.031156  | 0.511068  | -2.124561 |
| Mg     | 1.068848  | 1.189485  | 1.489499  |
| 4      |           |           |           |
| Al3Mg1 |           |           |           |
| Al     | -1.117116 | -1.049857 | 0.479907  |
| Al     | -0.839849 | 0.989659  | -0.946408 |
| Al     | 0.846719  | -0.857776 | -1.061954 |
| Mg     | 1.110245  | 0.917974  | 1.528454  |
| 4      |           |           |           |
| Al4Mg0 |           |           |           |
| Al     | -0.935881 | -0.076511 | 1.272816  |
| Al     | -0.890227 | 0.077552  | -1.305093 |
| Al     | 0.912427  | 1.288636  | 0.093171  |
| Al     | 0.913681  | -1.289676 | -0.060894 |
| 5      |           |           |           |
| Al0Mg5 |           |           |           |
| Mg     | 1.166990  | -0.666802 | -1.522505 |
| Mg     | -2.309553 | -0.834817 | -1.404638 |
| Mg     | -0.685859 | 1.911553  | -0.008381 |
| Mg     | 2.309553  | 0.834820  | 1.404638  |
| Mg     | -0.481132 | -1.244754 | 1.530886  |
| 5      |           |           |           |
| Al1Mg4 |           |           |           |
| Al     | -0.028373 | 0.307610  | -1.212035 |
| Mg     | 2.807193  | -0.412254 | -0.628223 |
| Mg     | -2.827290 | 0.630503  | -0.231593 |

|        |           |           |           |
|--------|-----------|-----------|-----------|
| Mg     | -0.338670 | -2.054114 | 0.589810  |
| Mg     | 0.387141  | 1.528255  | 1.482041  |
| 5      |           |           |           |
| Al2Mg3 |           |           |           |
| Al     | -0.836874 | -0.736896 | -0.824573 |
| Al     | 0.921668  | -0.645474 | 0.810673  |
| Mg     | -1.901886 | -0.527383 | 2.074770  |
| Mg     | -0.132432 | 2.159060  | 0.021711  |
| Mg     | 1.949524  | -0.249308 | -2.082582 |
| 5      |           |           |           |
| Al3Mg2 |           |           |           |
| Al     | -0.122435 | 0.972221  | -1.075835 |
| Al     | 0.366692  | -1.375748 | -0.300803 |
| Al     | -0.244257 | 0.403526  | 1.376636  |
| Mg     | -2.703650 | -0.657911 | -0.286859 |
| Mg     | 2.703650  | 0.657911  | 0.286860  |
| 5      |           |           |           |
| Al4Mg1 |           |           |           |
| Al     | -0.859707 | 0.450075  | -1.153630 |
| Al     | 1.508118  | 1.430803  | -0.826437 |
| Al     | 1.060830  | -1.044587 | -0.236650 |
| Al     | 0.070842  | 0.852535  | 1.241246  |
| Mg     | -1.780083 | -1.688826 | 0.975471  |
| 5      |           |           |           |
| Al5Mg0 |           |           |           |
| Al     | -0.034159 | 0.818451  | -1.309782 |
| Al     | 0.564565  | -1.701114 | -1.077710 |
| Al     | -1.270790 | -0.730670 | 0.487617  |
| Al     | 1.304949  | -0.087782 | 0.822166  |
| Al     | -0.564566 | 1.701115  | 1.077709  |
| 6      |           |           |           |
| Al0Mg6 |           |           |           |
| Mg     | -0.447143 | 1.847985  | -1.581350 |
| Mg     | 1.789759  | -0.838751 | -1.486245 |
| Mg     | -1.646962 | -1.413193 | -1.185776 |
| Mg     | 1.646963  | 1.413193  | 1.185775  |
| Mg     | -1.789759 | 0.838750  | 1.486245  |
| Mg     | 0.447142  | -1.847984 | 1.581351  |
| 6      |           |           |           |
| Al1Mg5 |           |           |           |
| Al     | -0.737685 | 0.583367  | 0.261350  |
| Mg     | 0.698625  | 1.567160  | -2.175743 |
| Mg     | -2.227446 | -0.860904 | -1.894338 |
| Mg     | 1.087035  | -1.704903 | -0.414851 |
| Mg     | 1.879072  | 1.440412  | 1.439613  |
| Mg     | -0.699601 | -1.025132 | 2.783970  |
| 6      |           |           |           |
| Al2Mg4 |           |           |           |
| Al     | 0.458552  | -0.543519 | -0.985131 |
| Al     | -0.458559 | 0.543634  | 0.985066  |
| Mg     | 0.399473  | 2.543253  | -1.217425 |
| Mg     | -2.606653 | -0.135345 | -1.138681 |
| Mg     | 2.606586  | 0.135123  | 1.138796  |
| Mg     | -0.399399 | -2.543146 | 1.217376  |
| 6      |           |           |           |
| Al3Mg3 |           |           |           |
| Al     | -1.363337 | 0.413446  | 1.427340  |
| Al     | -0.822331 | 0.011288  | -1.003340 |
| Al     | 0.920183  | -0.451706 | 0.795141  |
| Mg     | -1.345051 | -2.638533 | 0.623952  |
| Mg     | 0.504258  | 2.622810  | 0.186649  |
| Mg     | 2.106279  | 0.042696  | -2.029742 |
| 6      |           |           |           |
| Al4Mg2 |           |           |           |
| Al     | -1.276787 | -0.263250 | -0.309454 |
| Al     | -0.276774 | 0.911723  | 1.784010  |
| Al     | 0.079117  | 1.941662  | -0.560555 |
| Al     | 1.312628  | -0.254131 | 0.087614  |
| Mg     | -0.289941 | -2.241218 | 1.942275  |
| Mg     | 0.451757  | -0.094786 | -2.943891 |
| 6      |           |           |           |
| Al5Mg1 |           |           |           |
| Al     | 0.293412  | 0.536339  | -1.712646 |
| Al     | 0.555796  | -1.846684 | -0.623665 |

|        |           |           |           |
|--------|-----------|-----------|-----------|
| Al     | -1.692868 | -0.487571 | -0.450955 |
| Al     | 1.758009  | 0.271132  | 0.377855  |
| Al     | -0.228274 | -0.752780 | 1.639547  |
| Mg     | -0.686075 | 2.279564  | 0.769864  |
| 6      |           |           |           |
| Al6Mg0 |           |           |           |
| Al     | -1.152431 | -1.253321 | 0.767811  |
| Al     | -1.088983 | 0.072790  | -1.515674 |
| Al     | -0.987149 | 1.382872  | 0.775660  |
| Al     | 0.987149  | -1.382872 | -0.775661 |
| Al     | 1.088982  | -0.072790 | 1.515673  |
| Al     | 1.152433  | 1.253321  | -0.767809 |
| 7      |           |           |           |
| Al0Mg7 |           |           |           |
| Mg     | 1.252889  | -1.978102 | -1.853143 |
| Mg     | -2.166457 | -1.206940 | -1.663286 |
| Mg     | 0.228545  | 1.323017  | -1.257713 |
| Mg     | 2.940785  | -0.015597 | 0.517984  |
| Mg     | -2.591831 | 1.232175  | 0.825176  |
| Mg     | -0.228545 | -1.323018 | 1.257712  |
| Mg     | 0.564615  | 1.968466  | 2.173271  |
| 7      |           |           |           |
| Al1Mg6 |           |           |           |
| Al     | 0.542318  | 0.314670  | 0.052878  |
| Mg     | -2.249986 | 0.796230  | 1.061226  |
| Mg     | -1.153760 | -0.531331 | -2.282339 |
| Mg     | -0.350492 | -2.443050 | 0.855073  |
| Mg     | -0.147466 | 2.942592  | -1.216740 |
| Mg     | 0.938627  | 0.357867  | 3.025214  |
| Mg     | 2.420759  | -1.436978 | -1.495313 |
| 7      |           |           |           |
| Al2Mg5 |           |           |           |
| Al     | -0.502281 | -0.355031 | -1.042086 |
| Al     | 0.502282  | 0.355032  | 1.042087  |
| Mg     | 0.712762  | 2.546209  | -1.211050 |
| Mg     | 2.643601  | -0.275031 | -1.180499 |
| Mg     | -2.203070 | 1.848686  | 0.432070  |
| Mg     | 0.921068  | -2.716190 | 0.481451  |
| Mg     | -2.074361 | -1.403675 | 1.478028  |
| 7      |           |           |           |
| Al3Mg4 |           |           |           |
| Al     | 0.788832  | -0.893145 | -1.319975 |
| Al     | -0.387744 | 1.331345  | -1.113324 |
| Al     | -0.628575 | -0.401106 | 0.738974  |
| Mg     | -2.319640 | -1.055920 | -1.840733 |
| Mg     | 2.173965  | 1.083605  | 0.712926  |
| Mg     | 1.536068  | -2.583812 | 1.174047  |
| Mg     | -1.162906 | 2.519033  | 1.648085  |
| 7      |           |           |           |
| Al4Mg3 |           |           |           |
| Al     | -1.592567 | 0.682128  | 0.522227  |
| Al     | -0.660301 | -0.462330 | -1.620046 |
| Al     | 0.555189  | 1.607789  | -0.617312 |
| Al     | 0.637165  | -0.685915 | 0.643702  |
| Mg     | -1.971337 | -2.451403 | 0.451735  |
| Mg     | 0.549270  | 1.841518  | 2.531153  |
| Mg     | 2.482579  | -0.531788 | -1.911460 |
| 7      |           |           |           |
| Al5Mg2 |           |           |           |
| Al     | -0.634185 | 1.509362  | -0.908535 |
| Al     | 1.464720  | -0.060350 | -0.889465 |
| Al     | -0.726349 | -0.930368 | 0.262022  |
| Al     | -1.887810 | 1.117322  | 1.340229  |
| Al     | 0.716304  | 1.089375  | 1.343866  |
| Mg     | -0.849569 | -0.932499 | -2.881068 |
| Mg     | 1.916889  | -1.792841 | 1.732951  |
| 7      |           |           |           |
| Al6Mg1 |           |           |           |
| Al     | -1.948232 | -0.915854 | 0.574439  |
| Al     | -1.606374 | 1.201306  | -0.969961 |
| Al     | -0.899646 | 1.294112  | 1.574900  |
| Al     | -0.106016 | -0.943549 | -1.316948 |
| Al     | 0.605111  | -0.850166 | 1.243757  |
| Al     | 0.949102  | 1.280167  | -0.310259 |

|        |           |           |           |
|--------|-----------|-----------|-----------|
| Mg     | 3.006054  | -1.066017 | -0.795928 |
| 7      |           |           |           |
| Al7Mg0 |           |           |           |
| Al     | -1.626870 | -1.418616 | 0.603125  |
| Al     | -1.169904 | 0.952220  | 1.657569  |
| Al     | -0.898809 | 0.611659  | -0.985758 |
| Al     | 0.164444  | -1.828974 | -1.284818 |
| Al     | 0.898810  | -0.611661 | 0.985756  |
| Al     | 0.903824  | 2.007124  | 0.421306  |
| Al     | 1.728505  | 0.288248  | -1.397181 |

|        |           |           |           |
|--------|-----------|-----------|-----------|
| 8      |           |           |           |
| Al0Mg8 |           |           |           |
| Mg     | -2.015384 | -0.025328 | -2.566066 |
| Mg     | -1.953476 | 1.108498  | 0.746528  |
| Mg     | -0.956398 | -2.165031 | 0.009159  |
| Mg     | -0.249619 | -0.797063 | 3.154285  |
| Mg     | -0.094163 | 2.780499  | -1.705012 |
| Mg     | 1.398059  | -0.383101 | -1.871043 |
| Mg     | 1.511810  | 1.439633  | 1.115357  |
| Mg     | 2.359171  | -1.958107 | 1.116792  |

|        |           |           |           |
|--------|-----------|-----------|-----------|
| 8      |           |           |           |
| Al1Mg7 |           |           |           |
| Al     | -0.135281 | 0.067876  | -0.059553 |
| Mg     | -2.637280 | 1.324139  | -1.160594 |
| Mg     | -2.270072 | -1.822984 | 0.895525  |
| Mg     | -0.115711 | 2.776171  | 1.247942  |
| Mg     | 0.392840  | 0.048438  | -3.020221 |
| Mg     | 0.803141  | -0.585445 | 2.726391  |
| Mg     | 1.180413  | -2.613233 | -0.446142 |
| Mg     | 2.781950  | 0.805038  | -0.183347 |

|        |           |           |           |
|--------|-----------|-----------|-----------|
| 8      |           |           |           |
| Al2Mg6 |           |           |           |
| Al     | 0.508457  | 0.556771  | -0.433210 |
| Al     | -1.109095 | -1.193898 | 0.019132  |
| Mg     | -0.704505 | -0.690326 | -3.062808 |
| Mg     | 1.607574  | -2.310015 | -1.130009 |
| Mg     | -2.445576 | 1.456458  | -1.046673 |
| Mg     | 2.152406  | 2.284522  | 1.423345  |
| Mg     | 1.250588  | -1.218221 | 2.089305  |
| Mg     | -1.259850 | 1.114709  | 2.140917  |

|        |           |           |           |
|--------|-----------|-----------|-----------|
| 8      |           |           |           |
| Al3Mg5 |           |           |           |
| Al     | -0.137525 | 1.392419  | -0.619597 |
| Al     | 0.166712  | -1.102025 | -1.048534 |
| Al     | 1.065408  | -0.058677 | 1.096838  |
| Mg     | -2.194926 | 0.180258  | -2.605162 |
| Mg     | -2.076731 | -0.439644 | 1.083804  |
| Mg     | -0.155336 | 2.547991  | 2.262928  |
| Mg     | 0.534935  | -3.112554 | 1.289583  |
| Mg     | 2.797464  | 0.592232  | -1.459861 |

|        |           |           |           |
|--------|-----------|-----------|-----------|
| 8      |           |           |           |
| Al4Mg4 |           |           |           |
| Al     | 0.094561  | -1.141512 | -1.122520 |
| Al     | 0.081795  | 1.442451  | -0.696201 |
| Al     | -1.391676 | -0.136432 | 0.785283  |
| Al     | 1.215316  | -0.164500 | 1.033434  |
| Mg     | -2.505518 | 0.339127  | -2.130537 |
| Mg     | 2.869100  | 0.281276  | -1.618932 |
| Mg     | -0.168640 | -2.973770 | 1.435281  |
| Mg     | -0.194938 | 2.353362  | 2.314193  |

|        |           |           |           |
|--------|-----------|-----------|-----------|
| 8      |           |           |           |
| Al5Mg3 |           |           |           |
| Al     | -0.938868 | 0.716642  | -0.953499 |
| Al     | 0.713722  | -1.321158 | -0.732741 |
| Al     | 1.222610  | 1.012987  | 0.520444  |
| Al     | -0.813944 | -0.548545 | 1.352167  |
| Al     | 1.661010  | -1.267788 | 1.686877  |
| Mg     | 1.773265  | 0.997826  | -2.578624 |
| Mg     | -2.320347 | -2.140801 | -0.906849 |
| Mg     | -1.297449 | 2.550837  | 1.612224  |

|        |           |          |           |
|--------|-----------|----------|-----------|
| 8      |           |          |           |
| Al6Mg2 |           |          |           |
| Al     | -0.700759 | 0.388411 | -1.868228 |

|    |           |           |           |
|----|-----------|-----------|-----------|
| Al | 1.366295  | -1.246696 | -1.659729 |
| Al | 1.683676  | 1.342440  | -1.240483 |
| Al | -0.547074 | -1.326652 | 0.154122  |
| Al | -0.224794 | 1.302421  | 0.579835  |
| Al | 1.842821  | -0.352562 | 0.782236  |
| Mg | -3.199216 | 0.380126  | 0.074426  |
| Mg | -0.220950 | -0.487486 | 3.177821  |

8

|        |           |           |           |
|--------|-----------|-----------|-----------|
| Al7Mg1 |           |           |           |
| Al     | -0.174263 | -1.021777 | -1.708518 |
| Al     | -0.084985 | 1.579424  | -1.221323 |
| Al     | 1.815836  | -0.020441 | -0.223633 |
| Al     | 0.559079  | -2.281776 | 0.486826  |
| Al     | -0.961618 | -0.099399 | 0.706954  |
| Al     | 0.702936  | 1.909088  | 1.271752  |
| Al     | 1.137077  | -0.474182 | 2.323358  |
| Mg     | -2.994062 | 0.409063  | -1.635416 |

8

|        |           |           |           |
|--------|-----------|-----------|-----------|
| Al8Mg0 |           |           |           |
| Al     | 0.533555  | -1.483777 | -1.901292 |
| Al     | -0.800961 | 0.780436  | -1.426557 |
| Al     | 1.686990  | 0.451307  | -0.485848 |
| Al     | -1.181666 | -1.368438 | 0.129262  |
| Al     | 0.144744  | 2.426735  | 0.437255  |
| Al     | 1.373051  | -1.976589 | 0.555885  |
| Al     | -2.051352 | 1.033628  | 0.908153  |
| Al     | 0.295638  | 0.136697  | 1.783141  |

9

|        |           |           |           |
|--------|-----------|-----------|-----------|
| Al0Mg9 |           |           |           |
| Mg     | -2.183777 | 0.888509  | -0.941403 |
| Mg     | -1.994937 | 1.651529  | 2.469551  |
| Mg     | -1.882344 | -1.723615 | 1.418101  |
| Mg     | -0.206254 | -1.885123 | -1.687694 |
| Mg     | -0.194154 | 3.571751  | 0.104620  |
| Mg     | 0.897116  | 0.374086  | 0.986856  |
| Mg     | 1.008897  | 1.359395  | -2.378910 |
| Mg     | 1.377330  | -3.078378 | 1.196902  |
| Mg     | 3.178124  | -1.158154 | -1.168023 |

9

|        |           |           |           |
|--------|-----------|-----------|-----------|
| Al1Mg8 |           |           |           |
| Al     | -0.000004 | -0.000006 | -0.000008 |
| Mg     | -0.082154 | 2.055263  | -2.222459 |
| Mg     | 1.979293  | -0.969559 | -2.076659 |
| Mg     | -2.909071 | 0.196222  | -0.817904 |
| Mg     | -0.847535 | -2.828522 | -0.671839 |
| Mg     | 2.463812  | 1.701104  | 0.453873  |
| Mg     | -0.992852 | 2.525417  | 1.344097  |
| Mg     | 1.922611  | -1.752081 | 1.550449  |
| Mg     | -1.534101 | -0.927839 | 2.440451  |

9

|        |           |           |           |
|--------|-----------|-----------|-----------|
| Al2Mg7 |           |           |           |
| Al     | -1.158145 | -0.847395 | -1.316649 |
| Al     | 0.394503  | 0.312636  | 0.148532  |
| Mg     | -2.515762 | 0.034835  | 1.378012  |
| Mg     | -1.753197 | 2.242027  | -1.127184 |
| Mg     | -0.350643 | -2.596922 | 1.167239  |
| Mg     | 0.082326  | 2.524525  | 2.181668  |
| Mg     | 0.886281  | 0.960876  | -2.894028 |
| Mg     | 1.760149  | -2.028443 | -1.469152 |
| Mg     | 2.654488  | -0.602139 | 1.931562  |

9

|        |           |           |           |
|--------|-----------|-----------|-----------|
| Al3Mg6 |           |           |           |
| Al     | 0.469411  | 0.434050  | -1.217836 |
| Al     | 1.285908  | -0.814855 | 0.870469  |
| Al     | -0.925141 | 0.488314  | 0.893031  |
| Mg     | 2.557201  | -1.793208 | -1.788996 |
| Mg     | -2.628900 | 0.353415  | -1.745864 |
| Mg     | -0.939042 | 3.197150  | -0.702626 |
| Mg     | -0.941320 | -2.405330 | -0.560053 |
| Mg     | 1.805047  | 2.207472  | 1.135819  |
| Mg     | -0.683164 | -1.667008 | 3.116055  |

9

|        |           |          |          |
|--------|-----------|----------|----------|
| Al4Mg5 |           |          |          |
| Al     | -0.671852 | 0.244890 | 1.218673 |



|    |           |           |           |
|----|-----------|-----------|-----------|
| Al | -0.278337 | 0.302929  | -1.351769 |
| Al | 0.524130  | -1.789439 | 0.039839  |
| Al | 1.785589  | 0.457807  | 0.283695  |
| Mg | -2.928756 | 1.688524  | -0.410244 |
| Mg | -2.539135 | -1.785009 | -0.429036 |
| Mg | 0.216509  | 3.124086  | 0.103692  |
| Mg | 1.532908  | -1.182805 | 2.970433  |
| Mg | 2.358944  | -1.060982 | -2.425284 |

9

Al5Mg4

|    |           |           |           |
|----|-----------|-----------|-----------|
| Al | 1.483740  | 0.547599  | -0.885104 |
| Al | -0.606850 | -1.069502 | -0.786487 |
| Al | -0.552712 | 1.163872  | 0.685977  |
| Al | 1.143240  | -0.872671 | 1.281560  |
| Al | -1.390709 | -1.100546 | 1.720400  |
| Mg | -1.016726 | 1.625993  | -2.428894 |
| Mg | 2.143383  | -2.544641 | -1.189833 |
| Mg | -3.457411 | 0.227985  | -0.218635 |
| Mg | 2.254044  | 2.021912  | 1.821016  |

9

Al6Mg3

|    |           |           |           |
|----|-----------|-----------|-----------|
| Al | -1.741180 | 1.561861  | 1.199523  |
| Al | -1.625662 | 0.826723  | -1.336555 |
| Al | -1.399961 | -0.986494 | 0.596119  |
| Al | 0.355828  | 2.216560  | -0.269953 |
| Al | 0.588019  | 0.407882  | 1.666216  |
| Al | 0.720795  | -0.333505 | -0.904477 |
| Mg | -1.413650 | -2.171293 | -2.328112 |
| Mg | 1.226379  | -2.649259 | 1.173736  |
| Mg | 3.289431  | 1.127526  | 0.203503  |

9

Al7Mg2

|    |           |           |           |
|----|-----------|-----------|-----------|
| Al | 0.967266  | -0.655160 | -1.961178 |
| Al | -0.576263 | 1.558017  | -1.565727 |
| Al | 1.982238  | 1.546664  | -0.919021 |
| Al | -1.061863 | -0.681808 | -0.328951 |
| Al | 1.627570  | -0.599730 | 0.611484  |
| Al | 0.134197  | 1.541567  | 0.994081  |
| Al | -0.504238 | -0.740701 | 2.177468  |
| Mg | 0.388004  | -3.382477 | 0.067473  |
| Mg | -2.956911 | 1.413628  | 0.924369  |

9

Al8Mg1

|    |           |           |           |
|----|-----------|-----------|-----------|
| Al | 1.131935  | -0.453393 | -1.884076 |
| Al | -1.314181 | -0.172906 | -0.851293 |
| Al | 0.373891  | 1.882666  | -0.807510 |
| Al | 2.534663  | 0.638339  | 0.088725  |
| Al | 0.740488  | -1.232099 | 0.630215  |
| Al | -1.821592 | 1.887548  | 0.738302  |
| Al | -1.563756 | -0.553537 | 1.751745  |
| Al | 0.505402  | 1.158569  | 1.772659  |
| Mg | -0.586851 | -3.155187 | -1.438766 |

9

Al9Mg0

|    |           |           |           |
|----|-----------|-----------|-----------|
| Al | -1.782004 | -0.949798 | 0.883054  |
| Al | -1.179754 | 1.576017  | 0.111890  |
| Al | -0.984484 | -0.431354 | -1.653151 |
| Al | -0.540362 | 0.725773  | 2.556176  |
| Al | -0.210115 | -2.669201 | -0.428950 |
| Al | 0.886595  | -0.468916 | 0.631385  |
| Al | 1.053602  | 1.335051  | -1.401786 |
| Al | 1.213133  | 2.138707  | 1.143257  |
| Al | 1.543388  | -1.256280 | -1.841876 |

10

Al0Mg10

|    |           |           |           |
|----|-----------|-----------|-----------|
| Mg | 0.370819  | -0.156440 | -3.682159 |
| Mg | -2.108787 | -1.889925 | -1.757158 |
| Mg | 2.862411  | 1.004962  | -1.379520 |
| Mg | 1.344439  | -2.176456 | -1.013937 |
| Mg | -0.494761 | 0.914805  | -0.499678 |
| Mg | -3.615901 | 0.131541  | 0.792592  |
| Mg | 1.557918  | 3.144443  | 1.185607  |
| Mg | -0.986405 | -2.008072 | 1.602255  |
| Mg | 2.038465  | -0.246575 | 1.832026  |

|        |           |           |           |
|--------|-----------|-----------|-----------|
| Mg     | -0.968198 | 1.281715  | 2.919971  |
| 10     |           |           |           |
| Al1Mg9 |           |           |           |
| Al     | -0.000015 | 0.000014  | -0.000003 |
| Mg     | -2.526352 | -1.616314 | -0.601508 |
| Mg     | -2.372452 | 1.899035  | -0.498676 |
| Mg     | -1.075394 | 1.053549  | 2.662762  |
| Mg     | -0.537783 | 0.237685  | -3.001840 |
| Mg     | -0.276206 | -2.312827 | 2.014452  |
| Mg     | 0.887853  | -2.626155 | -1.292890 |
| Mg     | 0.913193  | 2.907569  | 0.262438  |
| Mg     | 2.338685  | 0.043490  | 1.971090  |
| Mg     | 2.648470  | 0.413954  | -1.515825 |
| 10     |           |           |           |
| Al2Mg8 |           |           |           |
| Al     | -0.217142 | -0.106170 | -0.026179 |
| Al     | 1.876439  | 1.104163  | 0.259085  |
| Mg     | 1.353435  | 0.188635  | -2.728287 |
| Mg     | -2.428288 | 0.045492  | -2.092405 |
| Mg     | -0.255673 | 2.834950  | -1.249655 |
| Mg     | -0.976364 | -2.996621 | -0.557886 |
| Mg     | 2.427161  | -1.919248 | -0.249390 |
| Mg     | -2.566251 | -0.636468 | 1.812809  |
| Mg     | -0.374489 | 2.247436  | 2.114920  |
| Mg     | 1.161173  | -0.762168 | 2.716989  |
| 10     |           |           |           |
| Al3Mg7 |           |           |           |
| Al     | -1.420748 | 0.186209  | 0.382660  |
| Al     | 0.624428  | -1.336049 | 0.156980  |
| Al     | 0.867611  | 1.190825  | -0.169694 |
| Mg     | -1.669039 | -2.522661 | 1.890781  |
| Mg     | -1.642456 | -1.926580 | -1.889187 |
| Mg     | -1.297185 | 1.661067  | -2.352999 |
| Mg     | -1.119722 | 3.184527  | 1.153088  |
| Mg     | 0.551044  | 0.316514  | 2.858595  |
| Mg     | 1.606564  | -0.500230 | -2.673411 |
| Mg     | 3.499503  | -0.253622 | 0.643187  |
| 10     |           |           |           |
| Al4Mg6 |           |           |           |
| Al     | -0.369361 | 1.111796  | -1.104305 |
| Al     | -0.970493 | -1.256284 | -0.268160 |
| Al     | 1.546182  | -0.433448 | -0.115957 |
| Al     | -0.206338 | 0.577943  | 1.488432  |
| Mg     | 0.713101  | -1.239269 | -2.997073 |
| Mg     | -2.658390 | -0.286664 | -2.723140 |
| Mg     | 1.867634  | 2.726836  | 0.321072  |
| Mg     | -3.130088 | 0.978579  | 0.521268  |
| Mg     | 0.549351  | -2.466185 | 2.154739  |
| Mg     | 2.658403  | 0.286696  | 2.723124  |
| 10     |           |           |           |
| Al5Mg5 |           |           |           |
| Al     | 0.218260  | -0.636744 | -1.893328 |
| Al     | -0.859675 | 1.381825  | -0.616667 |
| Al     | -1.221091 | -1.220906 | 0.216994  |
| Al     | 1.145695  | 0.007852  | 0.521211  |
| Al     | -1.011991 | 0.750366  | 1.903951  |
| Mg     | -2.926361 | -0.319318 | -2.265591 |
| Mg     | 2.020874  | 1.919136  | -1.870791 |
| Mg     | 1.327988  | -3.070676 | -0.272548 |
| Mg     | 0.998227  | 3.079280  | 1.342415  |
| Mg     | 0.308074  | -1.890815 | 2.934352  |
| 10     |           |           |           |
| Al6Mg4 |           |           |           |
| Al     | -0.762963 | 1.313811  | 1.424472  |
| Al     | -0.679563 | -0.416361 | -0.611596 |
| Al     | 0.396354  | -1.056901 | 1.750195  |
| Al     | 0.815337  | 1.799272  | -0.659661 |
| Al     | 1.861459  | 1.140475  | 1.675342  |
| Al     | 1.974665  | -0.571414 | -0.333935 |
| Mg     | -2.763008 | -1.124815 | 1.647153  |
| Mg     | -2.268788 | 2.244093  | -1.195426 |
| Mg     | 0.466193  | -3.348553 | -0.427027 |
| Mg     | 0.960315  | 0.020394  | -3.269517 |
| 10     |           |           |           |

Al7Mg3  
Al -0.032841 0.147921 -2.158920  
Al 2.304683 0.216729 -0.947446  
Al -1.825813 1.513045 -0.795795  
Al 0.789575 -1.914029 -0.630046  
Al -1.780621 -1.107398 -0.535680  
Al 0.186472 0.523327 0.605489  
Al -0.504130 -1.800663 1.661222  
Mg 0.916942 3.063257 -1.210176  
Mg 2.595037 -1.144041 1.909402  
Mg -2.649303 0.501851 2.101950

10  
Al8Mg2  
Al 0.286387 -1.297201 -2.475046  
Al 2.215571 0.042370 -1.236948  
Al -1.588378 -1.858529 -0.680819  
Al -0.352013 0.520904 -0.627296  
Al 0.999553 -1.998983 0.004287  
Al 1.592673 0.254914 1.352428  
Al -0.802651 -0.942070 1.702618  
Al -0.590244 1.687931 1.732220  
Mg 1.566507 3.018116 -0.243454  
Mg -3.327405 0.572548 0.472011

10  
Al9Mg1  
Al -1.546039 2.014955 -1.212967  
Al -2.239602 -0.559550 -1.010237  
Al 0.333114 0.156880 -0.890200  
Al 2.654715 0.920070 0.166017  
Al 1.886288 -1.634928 0.344142  
Al 0.470285 2.456421 0.517749  
Al -0.733150 -1.670331 0.907176  
Al -1.621084 0.860872 1.179905  
Al 0.859392 0.214351 1.994167  
Mg -0.063918 -2.758741 -1.995752

10  
Al10Mg0  
Al -2.379654 -0.659705 0.553997  
Al -1.177627 0.091751 -1.762753  
Al -1.143921 1.750973 0.357844  
Al -1.021767 -2.431301 -0.997619  
Al -0.964282 0.398823 2.619465  
Al 0.301046 -0.789388 0.612859  
Al 1.071944 1.433928 -1.138989  
Al 1.222085 -1.175038 -1.879009  
Al 1.276870 1.521917 1.567881  
Al 2.815306 -0.141959 0.066325

11  
Al0Mg11  
Mg -1.746824 1.095817 -2.790968  
Mg 0.225637 -1.791608 -2.269926  
Mg 1.780434 1.365485 -2.220385  
Mg -0.333419 3.747861 -0.799740  
Mg -2.953256 -1.670566 -0.727439  
Mg 2.698067 -1.051465 0.167785  
Mg -0.515409 0.501193 0.370577  
Mg -0.116256 -2.983763 1.023846  
Mg 2.298875 2.306916 1.197933  
Mg -2.430293 -1.060402 2.786847  
Mg 1.092444 -0.459468 3.261470

11  
Al1Mg10  
Al -0.035576 -0.067373 0.043160  
Mg 0.316132 0.904924 -2.879842  
Mg -1.377951 -2.177796 -1.847183  
Mg 1.973718 -1.854995 -1.618087  
Mg -2.751971 0.853262 -1.285855  
Mg 2.742550 1.258798 -0.326129  
Mg -0.323516 3.015902 -0.110533  
Mg -1.292983 -2.448538 1.567387  
Mg 2.040850 -1.679321 1.751661  
Mg -2.279177 0.796368 2.055381  
Mg 0.987924 1.398768 2.650040

11

|        |           |           |           |
|--------|-----------|-----------|-----------|
| Al2Mg9 |           |           |           |
| Al     | 0.402525  | -0.043786 | -0.505861 |
| Al     | -1.087283 | -0.626974 | 1.337765  |
| Mg     | 0.122137  | 0.079578  | -3.525763 |
| Mg     | 2.947353  | -1.295971 | -1.574193 |
| Mg     | -2.604478 | -0.801500 | -1.374691 |
| Mg     | 1.866230  | 2.486892  | -1.304103 |
| Mg     | -0.246511 | -3.112390 | -0.444154 |
| Mg     | -1.711976 | 2.205802  | -0.000302 |
| Mg     | 1.829099  | -1.637290 | 1.862632  |
| Mg     | 0.944612  | 1.654559  | 2.118012  |
| Mg     | -2.461709 | 1.091079  | 3.410657  |

|        |           |           |           |
|--------|-----------|-----------|-----------|
| 11     |           |           |           |
| Al3Mg8 |           |           |           |
| Al     | -1.389763 | -0.432514 | -0.255339 |
| Al     | 0.462900  | 0.218658  | 1.386222  |
| Al     | 0.926858  | 0.213855  | -1.130884 |
| Mg     | -2.439877 | 1.151999  | 2.296689  |
| Mg     | -1.475567 | -2.055292 | 2.480621  |
| Mg     | -1.459962 | 1.141750  | -3.019915 |
| Mg     | -0.824862 | 2.743432  | -0.157326 |
| Mg     | -0.495486 | -2.065494 | -2.836044 |
| Mg     | 0.824849  | -2.743437 | 0.157323  |
| Mg     | 2.453285  | 2.517169  | 0.447430  |
| Mg     | 3.417624  | -0.690126 | 0.631223  |

|        |           |           |           |
|--------|-----------|-----------|-----------|
| 11     |           |           |           |
| Al4Mg7 |           |           |           |
| Al     | -1.095895 | -0.948450 | 0.080995  |
| Al     | -0.176340 | 1.289991  | 1.265662  |
| Al     | 0.510113  | 0.702853  | -1.163146 |
| Al     | 1.354372  | -0.796118 | 0.910483  |
| Mg     | -2.619565 | 1.697073  | -0.642168 |
| Mg     | -1.623347 | -0.680557 | -2.998825 |
| Mg     | -0.815231 | -0.994587 | 3.270413  |
| Mg     | 0.069435  | -3.650185 | 1.143085  |
| Mg     | 0.214190  | 3.769097  | -0.619109 |
| Mg     | 1.270725  | -2.262579 | -1.849481 |
| Mg     | 2.911543  | 1.873462  | 0.602091  |

|        |           |           |           |
|--------|-----------|-----------|-----------|
| 11     |           |           |           |
| Al5Mg6 |           |           |           |
| Al     | -1.676043 | 0.033170  | -1.304538 |
| Al     | -0.850971 | 0.696239  | 1.111024  |
| Al     | 0.040158  | -1.559912 | -0.091258 |
| Al     | 0.810814  | 0.863674  | -1.019763 |
| Al     | 1.676042  | -0.033166 | 1.304542  |
| Mg     | -2.987941 | -1.680153 | 0.938280  |
| Mg     | -1.464285 | 3.111519  | -0.897442 |
| Mg     | -0.218210 | -1.735008 | 3.094061  |
| Mg     | 0.297614  | -1.349140 | -3.274495 |
| Mg     | 1.305486  | 3.056716  | 1.258283  |
| Mg     | 3.067336  | -1.403939 | -1.118693 |

|        |           |           |           |
|--------|-----------|-----------|-----------|
| 11     |           |           |           |
| Al6Mg5 |           |           |           |
| Al     | -1.719225 | -0.102511 | -0.536735 |
| Al     | -1.311118 | -0.538070 | 2.052888  |
| Al     | -0.696453 | 1.807029  | 0.999547  |
| Al     | 0.221390  | -1.770547 | 0.265471  |
| Al     | 0.844053  | 0.588013  | -0.819156 |
| Al     | 1.226857  | 0.153862  | 1.794617  |
| Mg     | -2.710979 | -2.913978 | 0.499043  |
| Mg     | -1.222259 | 2.657276  | -1.999966 |
| Mg     | -0.185596 | -1.592308 | -2.861985 |
| Mg     | 2.237631  | 2.954505  | 0.730297  |
| Mg     | 3.315699  | -1.243269 | -0.124020 |

|        |           |           |           |
|--------|-----------|-----------|-----------|
| 11     |           |           |           |
| Al7Mg4 |           |           |           |
| Al     | -1.898301 | 0.317727  | -0.013792 |
| Al     | -0.780498 | 0.454537  | 2.362360  |
| Al     | -0.541256 | 1.703714  | -1.789114 |
| Al     | -0.292560 | -1.675865 | 0.900307  |
| Al     | -0.142783 | -0.893844 | -1.698626 |
| Al     | 0.833840  | 0.804668  | 0.290180  |
| Al     | 2.023720  | -1.480828 | -0.328958 |
| Mg     | -2.687984 | -2.593978 | -0.935439 |

|         |           |           |           |
|---------|-----------|-----------|-----------|
| Mg      | -1.098433 | 3.276707  | 0.922655  |
| Mg      | 2.141044  | -0.745269 | 2.766791  |
| Mg      | 2.443211  | 0.832431  | -2.476364 |
| 11      |           |           |           |
| Al8Mg3  |           |           |           |
| Al      | -2.468871 | 0.298768  | 0.331481  |
| Al      | -0.834532 | -1.603380 | -0.471986 |
| Al      | -0.357376 | -0.205641 | 1.822095  |
| Al      | -0.128397 | 1.081814  | -0.632422 |
| Al      | 0.924655  | -0.753183 | -2.287039 |
| Al      | 1.675664  | 1.446703  | 1.323634  |
| Al      | 1.707384  | -1.010256 | 0.260391  |
| Al      | 2.481132  | 1.099315  | -1.185850 |
| Mg      | -2.128937 | 0.057247  | -2.863462 |
| Mg      | -1.166821 | 2.875520  | 1.762083  |
| Mg      | 0.296100  | -3.286908 | 1.941074  |
| 11      |           |           |           |
| Al9Mg2  |           |           |           |
| Al      | -0.737433 | -0.032867 | -2.524549 |
| Al      | 1.488598  | -1.318508 | -1.721580 |
| Al      | 1.279408  | 1.331451  | -1.415052 |
| Al      | -1.265587 | 1.898559  | -0.714285 |
| Al      | -0.351075 | -0.579155 | 0.045979  |
| Al      | 2.314092  | -0.168869 | 0.576970  |
| Al      | 0.679198  | 1.899600  | 1.158546  |
| Al      | -1.735240 | 0.911644  | 1.753876  |
| Al      | 0.490787  | -0.373999 | 2.556849  |
| Mg      | -3.397686 | -0.446162 | -0.693911 |
| Mg      | 1.234939  | -3.121696 | 0.977157  |
| 11      |           |           |           |
| Al10Mg1 |           |           |           |
| Al      | -1.937895 | 1.165017  | 0.211886  |
| Al      | -1.793097 | -1.534740 | 0.145138  |
| Al      | -1.554404 | -0.050840 | -2.124806 |
| Al      | -0.630665 | -0.176656 | 2.174545  |
| Al      | -0.089103 | 2.183150  | -1.491177 |
| Al      | 0.378811  | 2.128814  | 1.202955  |
| Al      | 0.509599  | -0.206968 | -0.480905 |
| Al      | 0.624261  | -2.286920 | 1.146233  |
| Al      | 2.032109  | 0.006044  | 1.693566  |
| Al      | 2.381509  | 1.658861  | -0.452215 |
| Mg      | 0.078874  | -2.885762 | -2.025220 |
| 11      |           |           |           |
| Al11Mg0 |           |           |           |
| Al      | 0.339190  | -0.427803 | -2.385651 |
| Al      | -2.250626 | -0.364485 | -1.914909 |
| Al      | -0.813216 | 1.948782  | -1.601109 |
| Al      | -0.776867 | -2.398462 | -0.816377 |
| Al      | 1.653774  | 1.267096  | -0.746286 |
| Al      | 1.676250  | -1.421089 | -0.261036 |
| Al      | -0.748015 | 0.034594  | 0.226273  |
| Al      | 0.010623  | 2.433898  | 1.048168  |
| Al      | 1.637003  | 0.336414  | 1.787859  |
| Al      | 0.046958  | -1.913347 | 1.832896  |
| Al      | -0.775073 | 0.504404  | 2.830173  |
| 12      |           |           |           |
| Al0Mg12 |           |           |           |
| Mg      | -3.123537 | -1.050082 | -0.197448 |
| Mg      | -1.942626 | 1.903954  | -1.870647 |
| Mg      | -1.919366 | 1.728147  | 1.696406  |
| Mg      | -1.115579 | -1.337110 | -3.148043 |
| Mg      | -1.056130 | -1.591083 | 2.692810  |
| Mg      | -0.555701 | -3.544436 | -0.265963 |
| Mg      | 0.246608  | -0.222034 | -0.217955 |
| Mg      | 0.854625  | 3.188663  | -0.014486 |
| Mg      | 1.396878  | 1.339907  | -3.032490 |
| Mg      | 1.402517  | 1.028608  | 2.805904  |
| Mg      | 2.302772  | -2.231624 | 1.630864  |
| Mg      | 3.509539  | 0.787091  | -0.078951 |
| 12      |           |           |           |
| Al1Mg11 |           |           |           |
| Al      | 0.101438  | -0.036526 | -0.091345 |
| Mg      | -0.687640 | -1.279273 | -2.980107 |
| Mg      | 0.608543  | 1.746814  | -2.751020 |

|    |           |           |           |
|----|-----------|-----------|-----------|
| Mg | -2.519199 | 1.187782  | -1.438542 |
| Mg | 0.716194  | -3.167487 | -0.666307 |
| Mg | 2.813124  | 1.728941  | -0.295560 |
| Mg | -2.450410 | -1.952112 | -0.106548 |
| Mg | -0.282628 | 3.109696  | 0.276554  |
| Mg | 2.879672  | -1.308376 | 0.992868  |
| Mg | -2.176197 | 0.783644  | 1.959685  |
| Mg | -0.171305 | -1.970745 | 2.431747  |
| Mg | 1.168409  | 1.157643  | 2.668575  |

12

Al2Mg10

|    |           |           |           |
|----|-----------|-----------|-----------|
| Al | -0.308494 | -0.281496 | -0.870019 |
| Al | 0.129245  | 0.496279  | 1.405894  |
| Mg | 1.226945  | -0.289154 | -3.488874 |
| Mg | -2.355924 | 0.508509  | -2.959880 |
| Mg | -0.822872 | -3.019183 | -2.064593 |
| Mg | -0.394269 | 2.850619  | -0.661613 |
| Mg | 2.557625  | 1.107795  | -0.470087 |
| Mg | 1.825476  | -2.074896 | 0.553956  |
| Mg | -2.883623 | 0.857098  | 0.623275  |
| Mg | -1.505413 | -2.179937 | 1.399522  |
| Mg | 1.512295  | 2.907079  | 2.590512  |
| Mg | 1.019010  | -0.882713 | 3.941906  |

12

Al3Mg9

|    |           |           |           |
|----|-----------|-----------|-----------|
| Al | -1.355852 | -0.541556 | -0.786965 |
| Al | 1.135017  | -0.230227 | -0.274711 |
| Al | -0.597409 | 1.344070  | 0.766472  |
| Mg | 0.587556  | -1.197746 | -3.240306 |
| Mg | -0.060340 | 1.958449  | -2.347724 |
| Mg | -3.126087 | 2.090856  | -1.011737 |
| Mg | 0.153097  | -3.298067 | -0.662057 |
| Mg | 2.174651  | 2.747750  | 0.010219  |
| Mg | 3.106162  | -2.117522 | 1.053878  |
| Mg | -3.356894 | 0.015394  | 1.620266  |
| Mg | -0.465925 | -1.583024 | 2.148968  |
| Mg | 1.806023  | 0.811622  | 2.723699  |

12

Al4Mg8

|    |           |           |           |
|----|-----------|-----------|-----------|
| Al | -1.190993 | -0.146584 | 1.083984  |
| Al | -0.470463 | 0.508195  | -1.461288 |
| Al | 0.637406  | -1.472843 | -0.198452 |
| Al | 1.024007  | 1.111242  | 0.575754  |
| Mg | -2.491726 | -1.871418 | -1.186796 |
| Mg | -1.792259 | 2.803824  | 0.213923  |
| Mg | -1.095828 | -3.205802 | 1.753013  |
| Mg | -0.330540 | 1.909598  | 3.285612  |
| Mg | 0.330523  | -1.909585 | -3.285617 |
| Mg | 1.095846  | 3.205785  | -1.753029 |
| Mg | 1.490207  | -1.058520 | 2.788930  |
| Mg | 2.793820  | 0.126108  | -1.816034 |

12

Al5Mg7

|    |           |           |           |
|----|-----------|-----------|-----------|
| Al | 0.807054  | 0.161442  | -1.492940 |
| Al | 1.232866  | -2.012981 | -0.071843 |
| Al | -0.660677 | 1.804713  | -0.003859 |
| Al | -1.090756 | -0.769987 | 0.212438  |
| Al | 1.213644  | 0.315957  | 1.154790  |
| Mg | -2.074146 | 0.698758  | -2.585166 |
| Mg | -0.710050 | -2.509237 | -2.444496 |
| Mg | 3.820784  | -0.337456 | -0.567047 |
| Mg | 2.242997  | 2.836507  | -0.509960 |
| Mg | -3.661098 | 0.990580  | 0.504369  |
| Mg | 0.097405  | -2.202389 | 2.813554  |
| Mg | -1.218025 | 1.024092  | 2.990161  |

12

Al6Mg6

|    |           |           |           |
|----|-----------|-----------|-----------|
| Al | -1.937739 | -0.708118 | 0.971485  |
| Al | -1.701080 | 0.171755  | -1.508934 |
| Al | -0.867813 | 1.680109  | 0.513175  |
| Al | -0.175491 | -1.833897 | -0.667258 |
| Al | 0.682954  | -0.325340 | 1.369067  |
| Al | 0.921583  | 0.561854  | -1.132099 |
| Mg | -1.192947 | 0.933444  | 3.569403  |

|         |           |           |           |
|---------|-----------|-----------|-----------|
| Mg      | -0.629293 | 3.028878  | -2.337722 |
| Mg      | -0.382874 | -3.178046 | 2.188257  |
| Mg      | 0.180663  | -1.082722 | -3.718900 |
| Mg      | 2.139650  | 2.463991  | 1.078139  |
| Mg      | 2.962387  | -1.711908 | -0.324613 |
| 12      |           |           |           |
| Al7Mg5  |           |           |           |
| Al      | -2.244765 | 0.451776  | -1.435983 |
| Al      | -1.395551 | -0.195318 | 0.973979  |
| Al      | -0.526603 | -1.520708 | -1.244777 |
| Al      | 0.256728  | 1.120203  | -0.864810 |
| Al      | 0.543257  | 1.453127  | 1.733524  |
| Al      | 1.200768  | -0.937918 | 0.782822  |
| Al      | 1.927783  | -0.741663 | -1.743188 |
| Mg      | -1.998661 | 2.929445  | 0.533513  |
| Mg      | -0.856780 | -3.323637 | 1.274737  |
| Mg      | -0.218609 | 0.238594  | -3.896143 |
| Mg      | 0.020908  | -0.890253 | 3.742321  |
| Mg      | 3.291524  | 1.416352  | 0.144005  |
| 12      |           |           |           |
| Al8Mg4  |           |           |           |
| Al      | -0.131475 | 1.757690  | -1.925455 |
| Al      | 1.676604  | -0.132550 | -1.394846 |
| Al      | 0.571838  | -2.429812 | -0.731660 |
| Al      | -0.884342 | -0.256685 | -0.327372 |
| Al      | -1.514116 | 2.299254  | 0.274312  |
| Al      | 1.082553  | 1.744698  | 0.469142  |
| Al      | 1.343724  | -0.838298 | 1.223483  |
| Al      | -0.658883 | 0.644274  | 2.194662  |
| Mg      | -0.639100 | -1.058115 | -3.381892 |
| Mg      | 4.044136  | 0.636426  | 0.538214  |
| Mg      | -3.633595 | 0.147104  | 1.157035  |
| Mg      | -1.257345 | -2.513987 | 1.904375  |
| 12      |           |           |           |
| Al9Mg3  |           |           |           |
| Al      | 0.046461  | 0.195496  | -0.410683 |
| Al      | -1.692307 | -1.815469 | -0.179528 |
| Al      | 0.981864  | -2.284289 | -0.100134 |
| Al      | -0.915150 | 2.604074  | 0.154763  |
| Al      | 1.735216  | 2.139430  | 0.233428  |
| Al      | -2.155190 | 0.450156  | 1.214807  |
| Al      | 2.106170  | -0.296915 | 1.341306  |
| Al      | -0.291200 | -1.314825 | 2.044381  |
| Al      | 0.168792  | 1.344401  | 2.253654  |
| Mg      | -0.200301 | -1.645409 | -2.969079 |
| Mg      | -2.688195 | 0.801852  | -1.874462 |
| Mg      | 2.903840  | -0.178502 | -1.708454 |
| 12      |           |           |           |
| Al10Mg2 |           |           |           |
| Al      | -2.375959 | -0.973065 | -0.971285 |
| Al      | -1.931536 | 1.743772  | -0.956006 |
| Al      | -1.084865 | -2.325354 | 1.049442  |
| Al      | -0.461712 | 0.186730  | -2.535092 |
| Al      | -0.317068 | 0.086921  | 0.310227  |
| Al      | 0.034031  | -2.195823 | -1.360863 |
| Al      | 0.771553  | 2.133174  | -1.087972 |
| Al      | 1.583279  | -1.768018 | 0.834717  |
| Al      | 1.956122  | -0.273901 | -1.381594 |
| Al      | 2.074475  | 0.931569  | 1.014377  |
| Mg      | -0.467418 | 2.876729  | 1.728959  |
| Mg      | 0.219098  | -0.422734 | 3.355088  |
| 12      |           |           |           |
| Al11Mg1 |           |           |           |
| Al      | -2.098653 | -0.739729 | 0.847268  |
| Al      | -1.951681 | 0.788207  | -1.428356 |
| Al      | -1.425642 | 1.892211  | 1.013465  |
| Al      | -1.116053 | -1.811625 | -1.453429 |
| Al      | -0.085221 | -0.000798 | 2.517207  |
| Al      | 0.108719  | -2.321062 | 0.971822  |
| Al      | 0.154827  | 2.490430  | -1.163373 |
| Al      | 0.351043  | 0.142925  | -2.726900 |
| Al      | 0.393095  | 0.099618  | -0.100240 |
| Al      | 1.209116  | 2.121570  | 1.368537  |
| Al      | 1.547007  | -1.920914 | -1.323915 |

|         |           |           |           |
|---------|-----------|-----------|-----------|
| Mg      | 2.913443  | -0.740833 | 1.477914  |
| 12      |           |           |           |
| Al12Mg0 |           |           |           |
| Al      | -2.182118 | 0.028271  | 1.326835  |
| Al      | -2.068043 | -0.555529 | -1.391941 |
| Al      | -1.801147 | 2.036102  | -0.512779 |
| Al      | -0.804399 | -2.187240 | 0.435912  |
| Al      | -0.331244 | 1.977565  | 1.905851  |
| Al      | -0.143499 | 1.016747  | -2.568734 |
| Al      | 0.120118  | 0.326619  | -0.065092 |
| Al      | 0.270140  | -0.648656 | 2.455436  |
| Al      | 0.454716  | -1.593257 | -1.943624 |
| Al      | 1.899784  | -1.650823 | 0.434184  |
| Al      | 2.234830  | 0.922006  | 1.344696  |
| Al      | 2.350862  | 0.328195  | -1.420744 |
| 13      |           |           |           |
| Al0Mg13 |           |           |           |
| Mg      | -3.108066 | -0.586713 | 1.344158  |
| Mg      | -2.611447 | -0.254100 | -2.219654 |
| Mg      | -2.222342 | 2.620699  | -0.065090 |
| Mg      | -1.312513 | -3.140349 | -0.476000 |
| Mg      | -0.682931 | 1.511170  | 3.010156  |
| Mg      | -0.120625 | -2.049352 | 2.756203  |
| Mg      | 0.000002  | 0.000000  | 0.000002  |
| Mg      | 0.120625  | 2.049352  | -2.756205 |
| Mg      | 0.682932  | -1.511171 | -3.010157 |
| Mg      | 1.312513  | 3.140348  | 0.475999  |
| Mg      | 2.222343  | -2.620698 | 0.065091  |
| Mg      | 2.611445  | 0.254101  | 2.219654  |
| Mg      | 3.108065  | 0.586714  | -1.344158 |
| 13      |           |           |           |
| Al1mg12 |           |           |           |
| Al      | -0.000001 | 0.000001  | 0.000001  |
| Mg      | -3.183076 | -0.588844 | -0.044457 |
| Mg      | -1.948547 | 2.534964  | 0.507732  |
| Mg      | -1.640485 | 1.101609  | -2.564364 |
| Mg      | -1.531037 | 0.101151  | 2.850680  |
| Mg      | -1.032570 | -2.218062 | -2.120065 |
| Mg      | -0.964928 | -2.836375 | 1.226607  |
| Mg      | 0.964926  | 2.836380  | -1.226603 |
| Mg      | 1.032575  | 2.218051  | 2.120080  |
| Mg      | 1.531030  | -0.101148 | -2.850684 |
| Mg      | 1.640483  | -1.101620 | 2.564356  |
| Mg      | 1.948559  | -2.534959 | -0.507740 |
| Mg      | 3.183072  | 0.588852  | 0.044457  |
| 13      |           |           |           |
| Al2Mg11 |           |           |           |
| Al      | -0.412900 | -0.471920 | 1.052575  |
| Al      | 0.469817  | 0.500026  | -1.015083 |
| Mg      | -3.198274 | -1.183409 | 2.020682  |
| Mg      | -2.633577 | 0.583410  | -1.054319 |
| Mg      | -0.938718 | -2.398647 | -1.324812 |
| Mg      | -0.799242 | 2.629413  | 1.016722  |
| Mg      | -0.350780 | 0.336818  | 3.971269  |
| Mg      | -0.118402 | -3.185607 | 2.373940  |
| Mg      | -0.060447 | 3.094754  | -2.492684 |
| Mg      | 0.305393  | -0.278183 | -3.942401 |
| Mg      | 2.225510  | -1.905901 | -0.065978 |
| Mg      | 2.263705  | 1.149829  | 1.505906  |
| Mg      | 3.247916  | 1.129415  | -2.045816 |
| 13      |           |           |           |
| Al3Mg10 |           |           |           |
| Al      | -1.405075 | 0.033643  | 1.179070  |
| Al      | -0.594022 | -1.634514 | -0.584013 |
| Al      | 0.688620  | 0.551439  | -0.204970 |
| Mg      | -3.756527 | -1.482543 | -0.325363 |
| Mg      | -2.043473 | 0.962876  | -1.851159 |
| Mg      | -1.847238 | -3.004917 | 1.993371  |
| Mg      | -1.122405 | 3.115953  | 0.538720  |
| Mg      | 0.626008  | -0.479565 | -3.261444 |
| Mg      | 0.776165  | 1.602395  | 2.844082  |
| Mg      | 1.209426  | -1.630781 | 2.099429  |
| Mg      | 1.379458  | 2.850999  | -2.062667 |
| Mg      | 2.524226  | -1.993388 | -0.955965 |



|        |           |           |           |
|--------|-----------|-----------|-----------|
| Mg     | 3.564838  | 1.108403  | 0.590908  |
| 13     |           |           |           |
| Al4Mg9 |           |           |           |
| Al     | -0.809338 | 0.797024  | -1.133126 |
| Al     | 0.779429  | -1.244182 | -0.674031 |
| Al     | 1.066170  | 0.994454  | 0.695805  |
| Al     | -1.035722 | -0.547894 | 1.112185  |
| Mg     | -0.095486 | -0.863230 | -3.680148 |
| Mg     | 2.409207  | 0.995129  | -2.130536 |
| Mg     | -2.105644 | -2.317647 | -1.236296 |
| Mg     | 0.480435  | 3.633878  | -0.928326 |
| Mg     | -3.742008 | 0.535555  | -0.091757 |
| Mg     | 3.328548  | -1.099352 | 1.099832  |
| Mg     | 0.407764  | -3.242592 | 1.678369  |
| Mg     | -1.489667 | 2.490737  | 1.706143  |
| Mg     | 0.806312  | -0.131881 | 3.581885  |
| 13     |           |           |           |
| Al5Mg8 |           |           |           |
| Al     | -0.136722 | -1.707465 | -1.295371 |
| Al     | 0.976644  | 0.625679  | -0.901771 |
| Al     | -1.453094 | 0.066525  | 0.206467  |
| Al     | 0.774295  | -1.124956 | 1.130016  |
| Al     | 0.309810  | 1.455984  | 1.547990  |
| Mg     | 1.495923  | -0.580766 | -3.741293 |
| Mg     | -1.704140 | 0.506880  | -2.875825 |
| Mg     | 2.983579  | -1.976792 | -0.908889 |
| Mg     | -0.828920 | 3.173388  | -0.820933 |
| Mg     | -1.814585 | -3.006164 | 0.987927  |
| Mg     | 3.339117  | 0.791241  | 1.236884  |
| Mg     | -2.686713 | 2.310912  | 2.003421  |
| Mg     | -1.255195 | -0.534466 | 3.431375  |
| 13     |           |           |           |
| Al6Mg7 |           |           |           |
| Al     | 0.186827  | 0.793631  | -1.904019 |
| Al     | 0.568012  | -1.692211 | -1.050641 |
| Al     | -1.657211 | -0.376406 | -0.356123 |
| Al     | 2.049724  | 0.286722  | -0.080412 |
| Al     | -0.167379 | 1.613418  | 0.619440  |
| Al     | 0.215962  | -0.886083 | 1.477525  |
| Mg     | -1.592019 | -1.391217 | -3.341521 |
| Mg     | -2.422579 | 2.503786  | -1.407313 |
| Mg     | 1.918111  | 3.296774  | -1.043008 |
| Mg     | -1.520094 | -3.381098 | 0.613074  |
| Mg     | 2.821192  | -2.592115 | 0.978579  |
| Mg     | -2.388209 | 0.520970  | 2.584507  |
| Mg     | 1.987664  | 1.303828  | 2.909910  |
| 13     |           |           |           |
| Al7Mg6 |           |           |           |
| Al     | -2.769802 | 0.303335  | 0.528338  |
| Al     | -1.096959 | 0.037349  | -1.481348 |
| Al     | -0.819617 | -1.434768 | 0.817784  |
| Al     | -0.341223 | 1.312661  | 0.881647  |
| Al     | 0.746915  | 1.936521  | -1.435425 |
| Al     | 1.184751  | -0.387512 | 2.194230  |
| Al     | 1.363998  | -0.469401 | -0.465092 |
| Mg     | -2.232138 | 3.004987  | -1.071093 |
| Mg     | -1.679288 | 0.070405  | 3.512075  |
| Mg     | -0.210327 | -2.948486 | -1.862516 |
| Mg     | 1.241713  | -0.226987 | -3.639147 |
| Mg     | 1.808077  | -3.233100 | 1.055785  |
| Mg     | 2.803901  | 2.034995  | 0.964761  |
| 13     |           |           |           |
| Al8Mg5 |           |           |           |
| Al     | -1.627801 | -1.766033 | -1.529824 |
| Al     | -1.551639 | -0.662264 | 0.865109  |
| Al     | -1.387547 | 1.981322  | 0.693048  |
| Al     | -0.445621 | 0.604471  | -1.369512 |
| Al     | 0.445477  | -1.646759 | 2.280066  |
| Al     | 0.727315  | -1.717148 | -0.342035 |
| Al     | 0.891083  | 0.681365  | 1.086842  |
| Al     | 2.187120  | 0.326683  | -1.200424 |
| Mg     | -3.636703 | 0.682287  | -1.157439 |
| Mg     | -1.022921 | 0.832663  | 3.645692  |
| Mg     | 0.831282  | -1.385870 | -3.524076 |

|         |           |           |           |
|---------|-----------|-----------|-----------|
| Mg      | 1.144903  | 3.304783  | -0.726471 |
| Mg      | 3.445053  | -1.235501 | 1.279024  |
| 13      |           |           |           |
| Al9Mg4  |           |           |           |
| Al      | -2.365414 | -1.315485 | -0.252625 |
| Al      | -2.157764 | 1.341070  | -0.668469 |
| Al      | -1.968557 | 0.365488  | 1.838670  |
| Al      | -1.033565 | -0.412801 | -2.393999 |
| Al      | -0.582021 | -1.941625 | 1.671113  |
| Al      | -0.374270 | 2.379711  | 1.080167  |
| Al      | -0.045260 | -2.471672 | -0.926636 |
| Al      | 0.183317  | 0.040182  | -0.067086 |
| Al      | 0.614012  | 0.320836  | 2.547537  |
| Mg      | 0.399591  | 2.496217  | -2.082277 |
| Mg      | 2.124915  | -0.715597 | -2.435268 |
| Mg      | 2.491813  | -1.862429 | 1.024152  |
| Mg      | 2.713202  | 1.776103  | 0.664721  |
| 13      |           |           |           |
| Al10Mg3 |           |           |           |
| Al      | 0.600343  | -0.758757 | -2.458073 |
| Al      | 0.968617  | 1.844780  | -1.625949 |
| Al      | 2.575903  | -0.154545 | -0.747508 |
| Al      | 1.103266  | -2.384376 | -0.287609 |
| Al      | -0.167460 | -0.022619 | -0.054627 |
| Al      | -0.774596 | 2.491862  | 0.410948  |
| Al      | 1.753298  | 1.790238  | 0.968977  |
| Al      | -0.636619 | -1.842623 | 1.782608  |
| Al      | 1.835851  | -0.803010 | 1.789624  |
| Al      | -0.238275 | 0.787250  | 2.511695  |
| Mg      | -2.040385 | 1.161747  | -2.294081 |
| Mg      | -1.927453 | -2.384869 | -1.171763 |
| Mg      | -3.052488 | 0.274921  | 1.175759  |
| 13      |           |           |           |
| Al11Mg2 |           |           |           |
| Al      | -2.259537 | -1.396482 | -0.231166 |
| Al      | -2.118110 | 0.646670  | 1.523668  |
| Al      | -2.044903 | 1.204343  | -1.165148 |
| Al      | -0.628247 | -1.611684 | 1.999353  |
| Al      | -0.423725 | 2.569460  | 0.543924  |
| Al      | -0.000573 | -0.093404 | -0.082866 |
| Al      | 0.444635  | 0.843322  | 2.483673  |
| Al      | 0.629335  | 1.788694  | -1.842319 |
| Al      | 2.045973  | -1.027340 | 1.322199  |
| Al      | 2.131726  | 1.575315  | 0.447538  |
| Al      | 2.248485  | -0.411422 | -1.372661 |
| Mg      | -0.573444 | -0.928730 | -3.066071 |
| Mg      | 0.548384  | -3.158744 | -0.560123 |
| 13      |           |           |           |
| Al12Mg1 |           |           |           |
| Al      | -2.215859 | 0.860563  | 1.168934  |
| Al      | -2.187099 | -0.133359 | -1.488568 |
| Al      | -1.839653 | -1.817670 | 0.659917  |
| Al      | -0.314803 | -0.524041 | 2.598080  |
| Al      | -0.269142 | -2.102419 | -1.622079 |
| Al      | -0.021730 | 0.059064  | -0.022327 |
| Al      | 0.326789  | 1.999329  | 1.706722  |
| Al      | 0.373295  | 0.391136  | -2.593197 |
| Al      | 0.861959  | -2.342785 | 0.885550  |
| Al      | 1.926962  | 1.709205  | -0.618413 |
| Al      | 2.198112  | -0.009290 | 1.513922  |
| Al      | 2.226323  | -0.984774 | -1.094275 |
| Mg      | -1.065154 | 2.895042  | -1.094266 |
| 13      |           |           |           |
| Al13Mg0 |           |           |           |
| Al      | -2.153456 | -0.796464 | -1.342070 |
| Al      | -2.097162 | 1.635030  | 0.037869  |
| Al      | -2.087437 | -0.776535 | 1.453431  |
| Al      | -0.539590 | 1.294795  | -2.259471 |
| Al      | -0.523855 | -2.607197 | 0.030956  |
| Al      | -0.432773 | 1.327045  | 2.263742  |
| Al      | 0.000000  | 0.000002  | 0.000001  |
| Al      | 0.432771  | -1.327045 | -2.263744 |
| Al      | 0.523856  | 2.607195  | -0.030954 |
| Al      | 0.539591  | -1.294793 | 2.259472  |

|         |           |           |           |
|---------|-----------|-----------|-----------|
| Al      | 2.087437  | 0.776535  | -1.453431 |
| Al      | 2.097163  | -1.635032 | -0.037870 |
| Al      | 2.153455  | 0.796463  | 1.342070  |
| 14      |           |           |           |
| Al0Mg14 |           |           |           |
| Mg      | -3.174409 | 1.164302  | 0.210917  |
| Mg      | -2.432885 | -2.206086 | 1.307754  |
| Mg      | -1.930632 | -1.279267 | -2.134462 |
| Mg      | -1.517810 | 0.601330  | 3.375424  |
| Mg      | -0.687098 | 0.182591  | -5.051854 |
| Mg      | -0.668202 | 2.171308  | -2.181464 |
| Mg      | -0.423528 | 3.285799  | 1.232925  |
| Mg      | 0.050901  | -0.013522 | 0.374267  |
| Mg      | 0.529587  | -3.315077 | -0.454732 |
| Mg      | 0.768239  | -2.163293 | 2.964590  |
| Mg      | 1.658233  | -0.642147 | -2.599565 |
| Mg      | 2.008831  | 1.227404  | 2.918365  |
| Mg      | 2.539611  | 2.178699  | -0.529650 |
| Mg      | 3.279163  | -1.192041 | 0.567488  |
| 14      |           |           |           |
| Al1Mg13 |           |           |           |
| Al      | -0.216512 | -0.112626 | 0.286938  |
| Mg      | 2.909121  | 1.513292  | -3.855392 |
| Mg      | -0.354338 | 1.319600  | -2.601889 |
| Mg      | -1.478375 | -1.853839 | -2.134066 |
| Mg      | 1.853661  | -1.214243 | -1.930367 |
| Mg      | -3.152771 | 0.778462  | -0.760897 |
| Mg      | 2.247335  | 1.843525  | -0.433141 |
| Mg      | -0.845246 | 3.063830  | 0.273816  |
| Mg      | 0.397882  | -3.296195 | 0.318980  |
| Mg      | -2.690419 | -2.069157 | 1.038675  |
| Mg      | 2.705759  | -1.011241 | 1.353801  |
| Mg      | -2.299575 | 0.966620  | 2.525106  |
| Mg      | 1.030946  | 1.620976  | 2.726629  |
| Mg      | -0.107468 | -1.549004 | 3.191806  |
| 14      |           |           |           |
| Al2Mg12 |           |           |           |
| Al      | -0.332003 | -1.099503 | -0.452992 |
| Al      | 0.392263  | 1.028142  | 0.559809  |
| Mg      | -1.761208 | -0.040820 | -2.928505 |
| Mg      | 0.536305  | -2.903812 | -2.742598 |
| Mg      | 1.714143  | 0.485143  | -2.244960 |
| Mg      | -0.729637 | 2.989642  | -1.486059 |
| Mg      | -2.898154 | -2.716680 | -0.679677 |
| Mg      | 2.578172  | 3.095498  | 0.113062  |
| Mg      | -2.738504 | 0.727804  | 0.429452  |
| Mg      | 2.581111  | -1.214803 | 0.706250  |
| Mg      | 0.218211  | -3.877759 | 0.715082  |
| Mg      | -0.855869 | 3.282704  | 2.175624  |
| Mg      | -0.679252 | -1.037140 | 2.664517  |
| Mg      | 1.974421  | 1.281586  | 3.170995  |
| 14      |           |           |           |
| Al3Mg11 |           |           |           |
| Al      | -0.778202 | 1.309275  | -0.363513 |
| Al      | 0.953601  | -0.443246 | 0.353559  |
| Al      | -1.543657 | -1.010417 | 0.406475  |
| Mg      | -1.192022 | 2.727692  | -3.015969 |
| Mg      | -0.268346 | -0.940158 | -2.587527 |
| Mg      | 2.009480  | 1.446875  | -1.972048 |
| Mg      | -3.383977 | 0.108156  | -1.874358 |
| Mg      | 3.329576  | -1.771005 | -0.994469 |
| Mg      | 0.205069  | -3.483827 | -0.459410 |
| Mg      | 1.645695  | 2.639797  | 1.132815  |
| Mg      | -3.498734 | 1.370625  | 1.245080  |
| Mg      | 3.046600  | -0.371912 | 2.553373  |
| Mg      | 0.074365  | -2.432443 | 2.723167  |
| Mg      | -0.599447 | 0.850588  | 2.852823  |
| 14      |           |           |           |
| Al4Mg10 |           |           |           |
| Al      | -1.034659 | -0.587874 | -1.096056 |
| Al      | -0.688705 | -0.032511 | 1.463585  |
| Al      | 0.382041  | 1.524860  | -0.382483 |
| Al      | 1.341323  | -0.904480 | 0.014954  |
| Mg      | -3.534523 | -1.272381 | 0.753791  |

|    |           |           |           |
|----|-----------|-----------|-----------|
| Mg | -2.806300 | 1.892323  | -0.031303 |
| Mg | -1.338466 | 1.921721  | -3.032408 |
| Mg | -0.799288 | -3.190290 | 0.800236  |
| Mg | -0.628977 | 3.060736  | 2.217273  |
| Mg | 0.628931  | -3.060736 | -2.217287 |
| Mg | 1.338504  | -1.921702 | 3.032405  |
| Mg | 1.440905  | 0.068010  | -3.062084 |
| Mg | 2.164683  | 1.229958  | 2.293151  |
| Mg | 3.534531  | 1.272366  | -0.753774 |

14

Al5Mg9

|    |           |           |           |
|----|-----------|-----------|-----------|
| Al | -1.319489 | -0.689343 | -0.533333 |
| Al | -0.911772 | 1.550874  | 0.787103  |
| Al | 0.591228  | -0.530640 | 1.367327  |
| Al | 0.933500  | 0.728725  | -0.999284 |
| Al | 1.053691  | -1.866269 | -0.903420 |
| Mg | -3.905089 | 1.030598  | -0.062155 |
| Mg | -2.392339 | -0.759453 | 2.468419  |
| Mg | -1.504768 | 2.177202  | -2.255279 |
| Mg | -0.755381 | -3.442474 | 1.046794  |
| Mg | -0.428982 | -0.916464 | -3.516673 |
| Mg | -0.016766 | 1.353559  | 3.805699  |
| Mg | 2.068992  | 2.474061  | 1.299681  |
| Mg | 3.005663  | -0.527066 | -2.977572 |
| Mg | 3.581512  | -0.583308 | 0.472692  |

14

Al6Mg8

|    |           |           |           |
|----|-----------|-----------|-----------|
| Al | 0.143096  | -1.223922 | -1.433764 |
| Al | -0.972919 | 1.183633  | -1.107507 |
| Al | 1.614654  | 0.821672  | -0.540266 |
| Al | -1.614647 | -0.821684 | 0.540271  |
| Al | 0.972917  | -1.183635 | 1.107513  |
| Al | -0.143098 | 1.223929  | 1.433757  |
| Mg | 0.922536  | 0.918509  | -3.622253 |
| Mg | -2.873413 | -1.013205 | -2.352103 |
| Mg | 3.209807  | -1.864167 | -1.018571 |
| Mg | 0.586142  | 3.795864  | -0.251607 |
| Mg | -0.586092 | -3.795878 | 0.251558  |
| Mg | -3.209808 | 1.864160  | 1.018575  |
| Mg | 2.873381  | 1.013215  | 2.352140  |
| Mg | -0.922556 | -0.918490 | 3.622255  |

14

Al7Mg7

|    |           |           |           |
|----|-----------|-----------|-----------|
| Al | -1.196689 | 0.369626  | -2.361938 |
| Al | 1.107743  | -0.347012 | -1.321354 |
| Al | -0.515552 | 1.584196  | -0.094069 |
| Al | -1.324277 | -1.011148 | -0.090462 |
| Al | 2.137832  | 1.601569  | 0.110013  |
| Al | 0.849723  | -2.532199 | 0.115732  |
| Al | 0.769278  | -0.237682 | 1.461518  |
| Mg | 1.071316  | 2.554955  | -2.718440 |
| Mg | -0.571867 | -2.718127 | -2.711122 |
| Mg | -3.647214 | 1.135651  | -0.603204 |
| Mg | 3.681739  | -1.146643 | 0.442090  |
| Mg | -2.101892 | 0.658434  | 2.507176  |
| Mg | 0.711837  | 2.746117  | 2.628271  |
| Mg | -0.971976 | -2.657737 | 2.635791  |

14

Al8Mg6

|    |           |           |           |
|----|-----------|-----------|-----------|
| Al | -1.669784 | 0.189657  | 0.325290  |
| Al | -1.299523 | -2.243738 | -0.666622 |
| Al | -0.961353 | 2.047223  | -1.432543 |
| Al | -0.350748 | 0.493150  | 2.607927  |
| Al | 0.224261  | -0.315306 | -1.667423 |
| Al | 0.614663  | -1.308920 | 0.915915  |
| Al | 0.830872  | 1.434569  | 0.426206  |
| Al | 2.611638  | -0.296636 | -0.508777 |
| Mg | -2.828653 | -0.245848 | -2.626259 |
| Mg | -2.064694 | -2.190187 | 2.428794  |
| Mg | -1.641625 | 3.178286  | 1.470542  |
| Mg | 1.641613  | -3.178312 | -1.470516 |
| Mg | 2.064697  | 2.190183  | -2.428807 |
| Mg | 2.828637  | 0.245880  | 2.626272  |

14

## Al9Mg5

|    |           |           |           |
|----|-----------|-----------|-----------|
| Al | -2.576724 | 0.019949  | -0.884607 |
| Al | -1.456334 | -2.195865 | -1.879423 |
| Al | -0.864401 | -1.421913 | 0.601666  |
| Al | -0.758673 | 1.366895  | 0.590177  |
| Al | -0.039404 | 0.059149  | -1.768046 |
| Al | 0.071956  | -0.069679 | 2.673894  |
| Al | 1.083176  | -2.271927 | -1.042836 |
| Al | 1.311975  | 2.156411  | -0.887894 |
| Al | 1.594463  | -0.106663 | 0.488434  |
| Mg | -3.121068 | 0.047390  | 2.277092  |
| Mg | -1.585530 | 2.804053  | -2.133503 |
| Mg | 1.540638  | -2.871731 | 2.075571  |
| Mg | 1.723784  | 2.599085  | 2.224533  |
| Mg | 3.076143  | -0.115154 | -2.335058 |

14

## Al10Mg4

|    |           |           |           |
|----|-----------|-----------|-----------|
| Al | 0.821385  | 0.523675  | -2.161933 |
| Al | -1.785279 | 1.109022  | -1.501450 |
| Al | 1.709013  | -1.734029 | -0.862520 |
| Al | 0.210887  | 2.393144  | -0.262322 |
| Al | -0.314563 | -0.362107 | 0.109097  |
| Al | 2.315622  | 0.680687  | 0.122512  |
| Al | -1.873578 | 1.526237  | 1.229762  |
| Al | 1.536214  | -1.248041 | 1.853233  |
| Al | 0.658989  | 1.300921  | 2.184750  |
| Al | -1.060454 | -0.718007 | 2.604718  |
| Mg | -1.119974 | -1.938085 | -2.498794 |
| Mg | 2.790060  | 2.983780  | -1.982146 |
| Mg | -3.371820 | -1.097019 | 0.321486  |
| Mg | -0.516500 | -3.420176 | 0.843608  |

14

## Al11Mg3

|    |           |           |           |
|----|-----------|-----------|-----------|
| Al | 1.872265  | -0.830742 | -1.585380 |
| Al | 1.288904  | 1.929233  | -1.413114 |
| Al | -0.462969 | -2.316670 | -1.372726 |
| Al | -1.427240 | 2.323846  | -1.061927 |
| Al | -0.290955 | 0.081259  | -0.347917 |
| Al | 2.211617  | 0.544423  | 0.733973  |
| Al | 1.123664  | -1.999428 | 0.779160  |
| Al | 0.216629  | 2.388348  | 1.079111  |
| Al | -1.586153 | -1.729038 | 1.097030  |
| Al | -2.169406 | 1.030974  | 1.269198  |
| Al | 0.074169  | -0.010753 | 2.391808  |
| Mg | -0.486240 | 0.244832  | -3.490499 |
| Mg | -3.223899 | -0.466270 | -1.367120 |
| Mg | 2.859615  | -1.190013 | 3.288403  |

14

## Al12Mg2

|    |           |           |           |
|----|-----------|-----------|-----------|
| Al | 0.756972  | -0.194338 | -2.277259 |
| Al | -1.121434 | 1.671882  | -1.320561 |
| Al | -1.705845 | -1.053799 | -1.293661 |
| Al | 1.550764  | 1.944637  | -0.748567 |
| Al | 0.582472  | -2.463577 | -0.683488 |
| Al | 2.629030  | -0.652613 | -0.323354 |
| Al | 0.177616  | -0.001226 | 0.351127  |
| Al | -2.425072 | 0.524461  | 0.848300  |
| Al | -0.435419 | 2.391961  | 1.237416  |
| Al | -1.367777 | -2.023681 | 1.262047  |
| Al | 1.298492  | -1.803813 | 1.893604  |
| Al | -0.594399 | 0.076803  | 2.857682  |
| Mg | -1.745124 | 0.354116  | -4.117197 |
| Mg | 2.399724  | 1.229186  | 2.313913  |

14

## Al13Mg1

|    |           |           |           |
|----|-----------|-----------|-----------|
| Al | -2.763631 | 0.923841  | -0.354661 |
| Al | -2.308745 | -1.343885 | 1.216789  |
| Al | -1.998393 | -1.481041 | -1.558791 |
| Al | -1.394620 | 1.152816  | 2.067302  |
| Al | -0.892215 | 0.930786  | -2.425954 |
| Al | -0.501671 | 2.563297  | -0.182750 |
| Al | -0.322360 | -0.086669 | -0.031757 |
| Al | -0.155824 | -2.740336 | 0.118001  |
| Al | 0.234649  | -1.107449 | 2.360942  |

|         |           |           |           |
|---------|-----------|-----------|-----------|
| Al      | 0.737004  | -1.329469 | -2.131867 |
| Al      | 1.330487  | 1.312560  | 1.508990  |
| Al      | 1.644469  | 1.173793  | -1.299220 |
| Al      | 2.104700  | -1.120605 | 0.290712  |
| Mg      | 4.286151  | 1.152362  | 0.422263  |
| 14      |           |           |           |
| Al14Mg0 |           |           |           |
| Al      | -2.753393 | 2.471166  | -0.963824 |
| Al      | -2.141170 | -0.066050 | -1.244518 |
| Al      | -1.900509 | -1.301900 | 1.258096  |
| Al      | -1.599126 | 1.482122  | 1.176397  |
| Al      | -0.706884 | -2.443400 | -1.013946 |
| Al      | -0.176981 | 2.099633  | -1.303081 |
| Al      | 0.132443  | -0.046184 | 2.734650  |
| Al      | 0.185463  | -0.166450 | 0.064919  |
| Al      | 0.303306  | -0.344957 | -2.584307 |
| Al      | 0.650117  | -2.433956 | 1.410944  |
| Al      | 1.143303  | 2.054212  | 1.167353  |
| Al      | 2.006059  | -1.845177 | -0.953189 |
| Al      | 2.334472  | 0.909970  | -1.104608 |
| Al      | 2.522899  | -0.369029 | 1.355114  |
| 15      |           |           |           |
| Al0Mg14 |           |           |           |
| Mg      | -0.778180 | -1.345451 | -4.581631 |
| Mg      | -3.205898 | 0.995583  | -3.483968 |
| Mg      | 0.150425  | 1.364585  | -2.577698 |
| Mg      | 1.484907  | -1.968933 | -1.935450 |
| Mg      | -2.088542 | -1.534818 | -1.345962 |
| Mg      | 3.258445  | 1.021297  | -0.856597 |
| Mg      | -2.505761 | 1.879239  | -0.131151 |
| Mg      | 0.764958  | 3.425751  | 0.270753  |
| Mg      | 0.292271  | 0.025670  | 0.591688  |
| Mg      | -0.132772 | -3.370234 | 1.009082  |
| Mg      | 3.099915  | -1.834537 | 1.316456  |
| Mg      | -2.626246 | -0.965825 | 2.136428  |
| Mg      | 2.635898  | 1.487187  | 2.658193  |
| Mg      | -0.904967 | 2.027322  | 3.127138  |
| Mg      | 0.555547  | -1.206835 | 3.802719  |
| 15      |           |           |           |
| Al1Mg14 |           |           |           |
| Al      | -0.358979 | 0.518548  | 0.214950  |
| Mg      | -3.087812 | -1.212828 | -0.079464 |
| Mg      | -2.965896 | 1.605798  | 1.815268  |
| Mg      | -2.733174 | 1.816899  | -1.573978 |
| Mg      | -1.286261 | -1.170199 | 2.826302  |
| Mg      | -0.897792 | -0.832315 | -2.669848 |
| Mg      | -0.733381 | 3.737987  | 0.399841  |
| Mg      | -0.046304 | -2.679662 | 0.068011  |
| Mg      | 0.170074  | 1.885605  | 3.108749  |
| Mg      | 0.538422  | 2.250453  | -2.378516 |
| Mg      | 1.459998  | -3.500585 | -2.970654 |
| Mg      | 2.002601  | -0.763676 | 2.008289  |
| Mg      | 2.242848  | -0.493364 | -1.383299 |
| Mg      | 2.339978  | 2.293093  | 0.527264  |
| Mg      | 3.355680  | -3.455753 | 0.087084  |
| 15      |           |           |           |
| Al2Mg13 |           |           |           |
| Al      | -0.755936 | 0.957238  | 0.294822  |
| Al      | 0.622181  | -1.025138 | -0.369673 |
| Mg      | -3.561263 | 1.496106  | 1.442486  |
| Mg      | -2.538306 | -1.635958 | 0.332808  |
| Mg      | -2.396081 | 2.746330  | -1.619168 |
| Mg      | -1.514851 | -0.422065 | -2.599539 |
| Mg      | -0.617947 | 2.223156  | 3.143339  |
| Mg      | -0.155499 | -1.119604 | 2.674384  |
| Mg      | -0.032356 | -3.979355 | 0.261735  |
| Mg      | 0.236320  | 3.914242  | 0.297813  |
| Mg      | 1.020382  | -2.786606 | -2.862870 |
| Mg      | 1.137980  | 1.618565  | -2.125038 |
| Mg      | 2.240725  | 1.137796  | 1.252804  |
| Mg      | 2.807879  | -2.368268 | 1.404365  |
| Mg      | 3.506771  | -0.756438 | -1.528268 |
| 15      |           |           |           |
| Al3Mg12 |           |           |           |

|    |           |           |           |
|----|-----------|-----------|-----------|
| Al | -0.967965 | 0.488384  | -0.734105 |
| Al | 1.187853  | 1.555951  | 0.147252  |
| Al | 0.660963  | -0.890520 | 0.696076  |
| Mg | -2.056834 | 0.149069  | -3.550749 |
| Mg | 0.411506  | 2.631822  | -2.711739 |
| Mg | 1.659223  | -0.464297 | -2.337515 |
| Mg | -0.809957 | -2.596473 | -1.580518 |
| Mg | -3.890491 | 1.251169  | -0.400661 |
| Mg | -1.206470 | 3.604064  | 0.068756  |
| Mg | 2.205281  | -3.458552 | 0.191577  |
| Mg | 3.786288  | -0.224813 | 0.251101  |
| Mg | -2.417216 | -1.630732 | 1.180503  |
| Mg | -1.101749 | 1.194523  | 2.406650  |
| Mg | 2.168149  | 0.747320  | 3.031536  |
| Mg | 0.371419  | -2.356918 | 3.341836  |

15  
Al4Mg11

|    |           |           |           |
|----|-----------|-----------|-----------|
| Al | -1.026718 | 0.815580  | 0.171952  |
| Al | 0.066112  | -1.500810 | 0.811756  |
| Al | 0.505192  | -0.446109 | -1.568934 |
| Al | 1.576532  | 0.657971  | 0.582254  |
| Mg | -3.919662 | 1.713848  | 0.036442  |
| Mg | -2.807551 | -1.104151 | 2.062326  |
| Mg | -2.455847 | -1.706250 | -1.208797 |
| Mg | -1.887397 | 1.106283  | -2.927208 |
| Mg | -0.189785 | 0.571329  | 3.280411  |
| Mg | 0.228760  | 3.391603  | 1.544656  |
| Mg | 0.271809  | -3.617890 | -1.552746 |
| Mg | 0.728355  | 2.776726  | -1.697912 |
| Mg | 2.502434  | -1.366117 | 2.856429  |
| Mg | 3.005773  | -2.086556 | -0.370008 |
| Mg | 3.401992  | 0.794544  | -2.020620 |

15  
Al5Mg10

|    |           |           |           |
|----|-----------|-----------|-----------|
| Al | -1.526359 | -0.435799 | -1.457022 |
| Al | -0.719929 | -1.154739 | 0.926515  |
| Al | -0.293804 | 1.368124  | 0.030929  |
| Al | 1.121761  | -0.716357 | -0.968872 |
| Al | 1.584214  | 0.166424  | 1.450900  |
| Mg | -3.377065 | -2.538491 | -0.013815 |
| Mg | -3.271307 | 0.781982  | 0.952773  |
| Mg | -2.453441 | 2.548324  | -1.908880 |
| Mg | -0.807938 | 0.774407  | 3.372689  |
| Mg | -0.364806 | -3.389242 | -1.488757 |
| Mg | 0.387641  | 1.182855  | -3.328370 |
| Mg | 1.209111  | 3.245554  | 2.039948  |
| Mg | 1.737311  | -3.001883 | 1.344203  |
| Mg | 2.653313  | 2.095934  | -0.887633 |
| Mg | 4.121296  | -0.927093 | -0.064606 |

15  
Al6Mg9

|    |           |           |           |
|----|-----------|-----------|-----------|
| Al | -1.085945 | -0.093127 | 1.324799  |
| Al | -0.975130 | -0.964151 | -1.172597 |
| Al | -0.512979 | 1.617846  | -0.612175 |
| Al | 1.008490  | -1.639148 | 0.467631  |
| Al | 1.458790  | 0.875882  | 1.013446  |
| Al | 1.463523  | 0.072553  | -1.541503 |
| Mg | -3.847569 | -1.040523 | -0.078885 |
| Mg | -3.268034 | 2.196316  | 0.624097  |
| Mg | -1.518873 | -3.281586 | 1.073057  |
| Mg | -0.693281 | 0.924908  | -3.689623 |
| Mg | -0.416844 | 2.872529  | 2.408726  |
| Mg | 0.978563  | -0.946338 | 3.553095  |
| Mg | 1.151538  | -2.953315 | -2.401816 |
| Mg | 2.235770  | 3.104159  | -1.087113 |
| Mg | 4.021982  | -0.746005 | 0.118863  |

15  
Al7Mg8

|    |           |           |           |
|----|-----------|-----------|-----------|
| Al | -1.897825 | 0.065801  | -0.007326 |
| Al | -0.343023 | -0.937176 | 1.954498  |
| Al | -0.262229 | 0.958170  | -1.956833 |
| Al | 0.310308  | -1.331334 | -0.638726 |
| Al | 0.396850  | 1.306796  | 0.641444  |
| Al | 2.192030  | -0.646198 | 1.183473  |

|    |           |           |           |
|----|-----------|-----------|-----------|
| Al | 2.240565  | 0.492486  | -1.166406 |
| Mg | -2.167481 | -3.041225 | 0.474696  |
| Mg | -2.100797 | -1.477452 | -2.752475 |
| Mg | -2.014572 | 1.620137  | 2.736587  |
| Mg | -1.947882 | 3.183934  | -0.490520 |
| Mg | 1.269222  | -3.631288 | 1.319427  |
| Mg | 1.371293  | -1.236042 | -3.623518 |
| Mg | 1.425704  | 1.139088  | 3.634261  |
| Mg | 1.527838  | 3.534302  | -1.308581 |

15

Al8Mg7

|    |           |           |           |
|----|-----------|-----------|-----------|
| Al | -1.070407 | 1.371622  | -2.025037 |
| Al | 1.068441  | -0.071959 | -1.380455 |
| Al | 0.315440  | -2.429029 | -0.375268 |
| Al | -1.398796 | -0.432488 | -0.113396 |
| Al | 2.649520  | 1.254578  | 0.283850  |
| Al | 0.073415  | 1.916493  | 0.306395  |
| Al | 0.980900  | -0.505834 | 1.354373  |
| Al | -1.208196 | 0.688786  | 2.278959  |
| Mg | -1.026140 | -1.578502 | -3.181619 |
| Mg | 1.698384  | 2.940811  | -2.252390 |
| Mg | -2.740159 | -3.196416 | -0.594768 |
| Mg | 3.453727  | -1.812854 | -0.177077 |
| Mg | -3.114575 | 2.246163  | 0.256633  |
| Mg | -1.206889 | -2.474671 | 2.467142  |
| Mg | 1.525335  | 2.083301  | 3.152658  |

15

Al9Mg6

|    |           |           |           |
|----|-----------|-----------|-----------|
| Al | -2.204266 | 0.071381  | -0.255142 |
| Al | -0.976133 | -1.883144 | -1.607109 |
| Al | -0.866927 | -1.881370 | 1.087092  |
| Al | -0.795966 | 0.698439  | -2.441414 |
| Al | -0.754660 | 0.689552  | 1.970790  |
| Al | -0.578421 | 2.253070  | -0.249037 |
| Al | 0.676356  | -0.173930 | -0.392161 |
| Al | 1.423503  | -0.859805 | 2.077563  |
| Al | 1.603635  | 1.721775  | 1.243277  |
| Mg | -3.471264 | -0.871702 | 2.502623  |
| Mg | -3.229302 | 2.594818  | 1.382466  |
| Mg | 1.651407  | -1.159073 | -3.229859 |
| Mg | 1.671779  | -3.191620 | -0.202319 |
| Mg | 2.050412  | 2.234417  | -1.955870 |
| Mg | 3.799848  | -0.242806 | 0.069098  |

15

Al10Mg5

|    |           |           |           |
|----|-----------|-----------|-----------|
| Al | 1.133469  | -1.016026 | -2.405383 |
| Al | 1.143225  | 1.586318  | -1.519277 |
| Al | -0.456137 | -0.288382 | -0.438729 |
| Al | -1.209913 | 2.226009  | -0.229839 |
| Al | 0.817522  | -2.650497 | -0.202661 |
| Al | 2.349280  | -0.417116 | -0.093353 |
| Al | -1.552333 | -2.113092 | 1.108155  |
| Al | 0.941372  | 1.539787  | 1.200384  |
| Al | -1.482523 | 0.513795  | 1.915638  |
| Al | 0.750341  | -1.070214 | 1.998357  |
| Mg | -1.420157 | 0.872756  | -3.206901 |
| Mg | -1.685782 | -2.655907 | -2.117918 |
| Mg | -3.596208 | -0.016116 | -0.360248 |
| Mg | 3.752537  | 2.405453  | 0.058501  |
| Mg | 0.515308  | 1.083232  | 4.293273  |

15

Al11Mg4

|    |           |           |           |
|----|-----------|-----------|-----------|
| Al | -1.936865 | -0.111692 | 0.980882  |
| Al | -1.604165 | -1.952329 | -1.023363 |
| Al | -1.590239 | 0.711519  | -1.638344 |
| Al | -0.410430 | 2.121775  | 0.434937  |
| Al | -0.341981 | -2.274702 | 1.399890  |
| Al | 0.211510  | -0.927809 | -2.827548 |
| Al | 0.438000  | 0.258797  | 2.317759  |
| Al | 0.529016  | -0.381751 | -0.248511 |
| Al | 0.938351  | -2.856345 | -0.987824 |
| Al | 0.942390  | 1.649989  | -1.904809 |
| Al | 2.197964  | 1.461270  | 0.564616  |
| Mg | -3.551095 | 2.465390  | 0.049935  |



|         |           |           |           |
|---------|-----------|-----------|-----------|
| Mg      | -1.892518 | 2.124084  | 3.245969  |
| Mg      | 2.826297  | -1.696319 | 1.476323  |
| Mg      | 3.243765  | -0.591876 | -1.839912 |
| 15      |           |           |           |
| Al12Mg3 |           |           |           |
| Al      | -2.210855 | -1.209306 | 1.897299  |
| Al      | -2.185196 | -1.863998 | -0.847867 |
| Al      | -1.432866 | 1.490214  | 2.166704  |
| Al      | -1.337736 | 0.433542  | -2.303432 |
| Al      | -0.870162 | 2.518197  | -0.429876 |
| Al      | -0.617101 | -0.022220 | 0.178726  |
| Al      | -0.100443 | -2.600296 | 0.804492  |
| Al      | 0.358222  | -0.555354 | 2.642365  |
| Al      | 0.390172  | -1.621232 | -1.743406 |
| Al      | 1.138743  | 1.716252  | 1.256118  |
| Al      | 1.208437  | 1.065660  | -1.487313 |
| Al      | 1.967598  | -0.815893 | 0.416780  |
| Mg      | -3.680551 | 0.912899  | -0.097206 |
| Mg      | 3.388219  | -1.051291 | -2.419371 |
| Mg      | 3.983516  | 1.602824  | -0.034014 |
| 15      |           |           |           |
| Al13Mg2 |           |           |           |
| Al      | -2.000534 | -1.290135 | 1.328384  |
| Al      | -1.930660 | 0.997136  | -0.268410 |
| Al      | -1.277566 | -1.539443 | -1.350056 |
| Al      | -0.910623 | 1.088999  | 2.327236  |
| Al      | 0.127028  | -2.958119 | 0.580524  |
| Al      | 0.252819  | 0.742425  | -2.044182 |
| Al      | 0.290653  | -0.301340 | 0.400608  |
| Al      | 0.345001  | -1.353763 | 2.848010  |
| Al      | 0.501515  | 2.344053  | 0.280394  |
| Al      | 1.498346  | -1.698324 | -1.517188 |
| Al      | 1.882755  | 0.874406  | 2.189583  |
| Al      | 2.510086  | -1.606351 | 1.087196  |
| Al      | 2.588259  | 0.680800  | -0.518324 |
| Mg      | -2.644041 | 0.469728  | -3.318508 |
| Mg      | -1.233037 | 3.549927  | -2.025268 |
| 15      |           |           |           |
| Al14Mg1 |           |           |           |
| Al      | -3.069662 | -1.860929 | -0.438323 |
| Al      | -2.366006 | 0.477719  | 0.552868  |
| Al      | -1.148662 | -0.696021 | -1.814880 |
| Al      | -1.119838 | 2.062269  | -1.403748 |
| Al      | -0.775827 | -1.940033 | 0.855601  |
| Al      | -0.726248 | 2.605927  | 1.315343  |
| Al      | -0.550583 | 0.162916  | 2.673543  |
| Al      | 0.273556  | 0.413601  | 0.154485  |
| Al      | 1.176354  | 0.730549  | -2.342362 |
| Al      | 1.357358  | -1.721785 | -0.991559 |
| Al      | 1.409095  | 2.762506  | -0.458709 |
| Al      | 1.745087  | -1.167039 | 1.731159  |
| Al      | 1.758879  | 1.595470  | 2.046522  |
| Al      | 2.929805  | 0.442949  | -0.202714 |
| Mg      | -0.893307 | -3.868100 | -1.677225 |
| 15      |           |           |           |
| Al15Mg0 |           |           |           |
| Al      | 0.672646  | -0.385921 | -2.434310 |
| Al      | -1.784998 | 1.139322  | -1.937023 |
| Al      | -1.927593 | -1.435790 | -1.568177 |
| Al      | 0.459492  | 2.393275  | -1.515704 |
| Al      | 0.174283  | -2.756909 | -0.777992 |
| Al      | 2.561348  | 1.072161  | -0.725448 |
| Al      | 2.418749  | -1.502953 | -0.356573 |
| Al      | 0.000001  | -0.000002 | -0.000009 |
| Al      | -2.826209 | 0.220565  | 0.447356  |
| Al      | -1.448049 | 2.431316  | 0.477613  |
| Al      | -1.695049 | -2.028964 | 1.116489  |
| Al      | 1.061296  | 2.392582  | 1.177104  |
| Al      | 0.814291  | -2.067684 | 1.816009  |
| Al      | 2.192435  | 0.143075  | 1.846337  |
| Al      | -0.672642 | 0.385928  | 2.434328  |
| 20      |           |           |           |
| Al0Mg20 |           |           |           |
| Mg      | -0.775964 | -1.344815 | -4.805012 |

|    |           |           |           |
|----|-----------|-----------|-----------|
| Mg | -0.234165 | 2.096401  | -3.794462 |
| Mg | 2.493655  | -0.338050 | -3.291320 |
| Mg | -3.385949 | 0.500601  | -2.979094 |
| Mg | 0.848094  | -3.518383 | -2.397771 |
| Mg | -2.721488 | -2.946610 | -2.121608 |
| Mg | -0.441030 | -0.467420 | -1.537337 |
| Mg | 1.737058  | 2.191284  | -0.807326 |
| Mg | 4.885546  | 0.743698  | -0.795755 |
| Mg | -1.795657 | 2.623166  | -0.495855 |
| Mg | 2.458658  | -1.552584 | 0.123969  |
| Mg | -3.288630 | -0.500628 | 0.535635  |
| Mg | -0.710921 | -3.004740 | 0.904117  |
| Mg | -0.057773 | 0.391490  | 1.618600  |
| Mg | 0.491341  | 3.722303  | 2.179593  |
| Mg | 3.180841  | 1.201870  | 2.367080  |
| Mg | -2.660066 | 2.127382  | 2.998108  |
| Mg | 1.573536  | -1.892534 | 3.576311  |
| Mg | -1.995646 | -1.319818 | 3.855641  |
| Mg | 0.398560  | 1.287386  | 4.866488  |

20  
Al1Mg19

|    |           |           |           |
|----|-----------|-----------|-----------|
| Al | -1.154735 | 1.034080  | 0.035357  |
| Mg | 2.580313  | -0.799887 | -3.600195 |
| Mg | -0.949821 | 0.001979  | -3.057998 |
| Mg | 0.219109  | -3.461605 | -2.868547 |
| Mg | -1.731309 | 3.225900  | -2.277872 |
| Mg | 1.414194  | 2.079524  | -1.701859 |
| Mg | -3.937704 | 0.738712  | -1.594175 |
| Mg | 3.476771  | -3.397790 | -1.140780 |
| Mg | -2.207428 | -2.003010 | -0.579631 |
| Mg | 1.041713  | -1.079045 | -0.563639 |
| Mg | 4.255062  | 0.100429  | -0.493766 |
| Mg | -0.142387 | 4.058274  | 0.611516  |
| Mg | -3.434720 | 3.233410  | 0.678319  |
| Mg | 0.434438  | -4.206491 | 0.690114  |
| Mg | 1.653829  | 1.384943  | 1.626702  |
| Mg | -3.727802 | 0.016566  | 1.722527  |
| Mg | 2.870887  | -1.933157 | 2.232232  |
| Mg | -0.637063 | -1.197501 | 2.336568  |
| Mg | -1.338673 | 2.040081  | 3.101471  |
| Mg | 1.315325  | 0.164587  | 4.843656  |

20  
Al2Mg18

|    |           |           |           |
|----|-----------|-----------|-----------|
| Al | 0.577622  | -0.689165 | -1.069414 |
| Al | -0.365396 | 1.078482  | 0.809717  |
| Mg | 0.629672  | 0.305773  | -4.180377 |
| Mg | 1.691654  | -2.805581 | -3.295170 |
| Mg | -1.602872 | -2.030102 | -3.103701 |
| Mg | 3.498685  | -0.065067 | -2.391762 |
| Mg | -1.842874 | 1.194993  | -2.048907 |
| Mg | 1.306340  | 2.396327  | -1.598581 |
| Mg | -0.123043 | -3.836776 | -0.598127 |
| Mg | -1.347301 | 4.011532  | -0.240903 |
| Mg | 3.058391  | -2.632603 | -0.197745 |
| Mg | -2.314716 | -1.357234 | 0.115109  |
| Mg | -3.579960 | 1.675867  | 0.836005  |
| Mg | 2.817371  | 0.592623  | 0.856410  |
| Mg | 1.521707  | 3.640690  | 1.547712  |
| Mg | 0.627605  | -1.737551 | 1.949431  |
| Mg | -2.069214 | -3.795861 | 2.532079  |
| Mg | -1.494643 | 3.166986  | 3.054090  |
| Mg | -2.070327 | -0.186698 | 3.282176  |
| Mg | 1.081299  | 1.073365  | 3.741956  |

20  
Al3Mg17

|    |           |           |           |
|----|-----------|-----------|-----------|
| Al | -1.441354 | -0.019033 | -0.660732 |
| Al | -0.017247 | 0.916380  | 1.293995  |
| Al | 1.131254  | -0.610758 | -0.531892 |
| Mg | -3.910223 | -1.865328 | -0.030642 |
| Mg | -3.416851 | -0.439976 | -3.063177 |
| Mg | -3.178542 | 2.472384  | -1.198943 |
| Mg | -3.133951 | 0.865474  | 1.869061  |
| Mg | -1.248125 | 3.740399  | 1.450821  |
| Mg | -0.968361 | -2.065421 | 1.693887  |

|    |           |           |           |
|----|-----------|-----------|-----------|
| Mg | -0.948656 | -2.907057 | -1.676323 |
| Mg | -0.786957 | 0.186177  | 4.256326  |
| Mg | -0.091414 | -0.102437 | -3.508892 |
| Mg | 0.269067  | 2.538305  | -1.410664 |
| Mg | 1.354894  | 2.694423  | 3.486542  |
| Mg | 1.766137  | -3.564261 | 0.418892  |
| Mg | 2.163447  | -0.862925 | 2.595358  |
| Mg | 2.294914  | -2.489402 | -2.800701 |
| Mg | 2.909708  | 1.868757  | 0.610439  |
| Mg | 3.036374  | 0.871972  | -2.629378 |
| Mg | 4.215887  | -1.227675 | -0.163976 |

20

Al4Mg16

|    |           |           |           |
|----|-----------|-----------|-----------|
| Al | -1.394760 | -0.997082 | -0.019985 |
| Al | -0.510935 | 1.271168  | 0.912411  |
| Al | 0.272883  | 0.468606  | -1.510973 |
| Al | 1.112423  | -0.825262 | 0.664077  |
| Mg | -3.763502 | -2.886627 | -0.096454 |
| Mg | -3.507285 | 0.339072  | 1.816331  |
| Mg | -2.770056 | 1.615467  | -1.298166 |
| Mg | -2.269436 | 3.631086  | 1.773972  |
| Mg | -2.169988 | -1.203824 | -3.017976 |
| Mg | -0.649578 | -0.766688 | 3.296299  |
| Mg | -0.430772 | -3.581793 | 1.436851  |
| Mg | -0.102987 | 3.681684  | -1.025117 |
| Mg | 0.561909  | -2.823143 | -1.742015 |
| Mg | 0.735178  | 2.504122  | 3.412704  |
| Mg | 0.925266  | -0.559786 | -4.366880 |
| Mg | 2.244184  | 2.320867  | -3.070743 |
| Mg | 2.530865  | 1.984247  | 0.416941  |
| Mg | 2.865850  | -0.297708 | 3.105069  |
| Mg | 3.055218  | -3.178270 | 0.928008  |
| Mg | 3.265520  | -0.696136 | -1.614354 |

20

Al5Mg15

|    |           |           |           |
|----|-----------|-----------|-----------|
| Al | 1.010575  | 0.261545  | -1.333077 |
| Al | -1.171890 | 1.624175  | -0.697109 |
| Al | -1.137213 | -0.956406 | -0.112601 |
| Al | 1.348305  | -1.524646 | 0.595604  |
| Al | 0.404214  | 0.851302  | 1.285581  |
| Mg | 1.952250  | -0.169005 | -4.217580 |
| Mg | 0.055056  | 2.666239  | -3.367475 |
| Mg | -1.533275 | -0.315818 | -3.243756 |
| Mg | 0.451342  | -2.795517 | -2.225749 |
| Mg | 3.598381  | -1.761027 | -1.549938 |
| Mg | -3.998869 | 0.360865  | -1.083704 |
| Mg | 1.576197  | 3.306743  | -0.449253 |
| Mg | 3.549023  | 0.841829  | 0.562612  |
| Mg | -0.454052 | -4.068149 | 0.734579  |
| Mg | -3.578474 | -2.472735 | 0.953257  |
| Mg | -1.067716 | 3.784126  | 1.551780  |
| Mg | -2.742605 | 0.886209  | 2.004335  |
| Mg | -0.744299 | -1.610508 | 3.029341  |
| Mg | 2.472968  | -0.639628 | 3.367908  |
| Mg | 0.010084  | 1.730406  | 4.195248  |

20

Al6Mg14

|    |           |           |           |
|----|-----------|-----------|-----------|
| Al | -1.841457 | 0.739680  | 0.310210  |
| Al | -0.584223 | -0.048523 | -1.921098 |
| Al | -0.205069 | 0.410699  | 2.375900  |
| Al | -0.141733 | -1.398220 | 0.414060  |
| Al | 0.840241  | 1.199197  | 0.049824  |
| Al | 1.854956  | -0.880807 | -1.280210 |
| Mg | -3.554437 | 1.012798  | -2.360574 |
| Mg | -3.066699 | 1.596664  | 3.118500  |
| Mg | -2.984590 | -1.985431 | -0.980300 |
| Mg | -2.708472 | -1.635445 | 2.326751  |
| Mg | -1.048839 | 3.134723  | -1.698273 |
| Mg | -0.766706 | 3.500795  | 1.606527  |
| Mg | -0.149501 | -3.239761 | -2.214909 |
| Mg | 0.350069  | -2.574497 | 3.332645  |
| Mg | 1.160699  | -1.053643 | -4.384243 |
| Mg | 1.792298  | 1.896462  | -2.935197 |
| Mg | 2.089305  | -3.664894 | 0.245850  |

|          |           |           |           |
|----------|-----------|-----------|-----------|
| Mg       | 2.242305  | 2.430696  | 2.630756  |
| Mg       | 2.740308  | -0.780789 | 1.819827  |
| Mg       | 3.981546  | 1.340297  | -0.456046 |
| 20       |           |           |           |
| Al7Mg13  |           |           |           |
| Al       | -0.318360 | -0.636845 | -1.258137 |
| Al       | -0.211763 | 2.052633  | -0.754748 |
| Al       | 2.026570  | 0.597674  | -0.750202 |
| Al       | -2.146227 | 0.562051  | 0.323721  |
| Al       | 1.474917  | -1.858528 | 0.357439  |
| Al       | -1.089163 | -1.880430 | 1.017330  |
| Al       | 0.343805  | 0.390042  | 1.348825  |
| Mg       | 0.809402  | 0.999210  | -3.689246 |
| Mg       | -2.505611 | 0.970930  | -2.836069 |
| Mg       | 2.414094  | -1.898176 | -2.625604 |
| Mg       | 2.305172  | 3.515362  | -1.970197 |
| Mg       | -0.365203 | -3.739943 | -1.543124 |
| Mg       | -3.350878 | -1.947396 | -1.141910 |
| Mg       | -3.025761 | 3.469893  | -0.598172 |
| Mg       | 2.096430  | 2.995071  | 1.377809  |
| Mg       | 0.469121  | -4.546561 | 1.671881  |
| Mg       | 3.563743  | -0.115415 | 1.900295  |
| Mg       | -1.218584 | 2.966723  | 2.231022  |
| Mg       | -2.201423 | -0.164702 | 3.383998  |
| Mg       | 0.929720  | -1.731592 | 3.555088  |
| 20       |           |           |           |
| Al8Mg12  |           |           |           |
| Al       | -2.098991 | -1.021494 | -0.275171 |
| Al       | -1.709301 | 0.077842  | 2.158772  |
| Al       | -0.541467 | 1.143200  | -0.015004 |
| Al       | 0.206545  | -1.488937 | 1.042143  |
| Al       | 0.234614  | -0.971854 | -1.669067 |
| Al       | 0.862703  | 0.850716  | 2.261356  |
| Al       | 0.964665  | 1.546054  | -2.144053 |
| Al       | 2.046575  | 0.186558  | -0.060523 |
| Mg       | -3.696877 | 1.653200  | 0.284008  |
| Mg       | -2.402736 | -2.995365 | 2.171343  |
| Mg       | -2.158083 | 0.863342  | -2.803130 |
| Mg       | -1.207504 | 3.216537  | 2.319697  |
| Mg       | -1.031263 | 3.884289  | -1.402028 |
| Mg       | -0.872565 | -3.835502 | -0.926458 |
| Mg       | 0.053586  | -1.462437 | 4.259653  |
| Mg       | 0.471192  | -0.248203 | -4.706053 |
| Mg       | 1.912018  | 3.271649  | 0.434255  |
| Mg       | 2.501405  | -2.938247 | -0.592419 |
| Mg       | 3.110209  | -1.340110 | 2.483859  |
| Mg       | 3.355276  | -0.391236 | -2.821180 |
| 20       |           |           |           |
| Al9Mg11  |           |           |           |
| Al       | -0.594608 | 0.369999  | -1.797814 |
| Al       | -0.998266 | -2.263750 | -1.329841 |
| Al       | 1.511438  | -1.236463 | -1.202538 |
| Al       | -2.682841 | -0.385558 | -0.259219 |
| Al       | 1.443282  | 1.270155  | -0.162037 |
| Al       | -1.147437 | 1.767220  | 0.457000  |
| Al       | -0.285420 | -0.822173 | 0.808006  |
| Al       | 2.334965  | -0.791387 | 1.345786  |
| Al       | 0.645587  | 1.084707  | 2.412483  |
| Mg       | 0.410229  | -1.541909 | -4.115701 |
| Mg       | -3.061110 | -0.991091 | -3.337785 |
| Mg       | 0.149047  | 3.406288  | -2.060164 |
| Mg       | -3.207800 | 2.264396  | -1.876623 |
| Mg       | 4.296792  | 0.174755  | -0.995932 |
| Mg       | 1.092357  | -3.715527 | 0.683805  |
| Mg       | 0.830406  | 4.048118  | 1.364677  |
| Mg       | -2.419939 | -3.078012 | 1.391869  |
| Mg       | 3.656308  | 1.976080  | 2.054270  |
| Mg       | -2.447639 | 0.263440  | 2.904291  |
| Mg       | 0.474648  | -1.799288 | 3.715467  |
| 20       |           |           |           |
| Al10Mg10 |           |           |           |
| Al       | -2.051502 | 0.383264  | -1.930470 |
| Al       | -1.265749 | -2.213726 | -1.489902 |
| Al       | 0.443862  | -0.196381 | -1.149014 |

|    |           |           |           |
|----|-----------|-----------|-----------|
| Al | 1.859832  | 1.830103  | -0.140610 |
| Al | -0.858876 | 1.944178  | -0.018836 |
| Al | 2.620367  | -0.774883 | 0.277525  |
| Al | -1.823483 | -0.573742 | 0.578279  |
| Al | 0.326600  | -2.219404 | 0.705744  |
| Al | 0.592676  | 0.300729  | 1.705820  |
| Al | -1.745045 | 1.337197  | 2.426398  |
| Mg | -0.196388 | -0.898204 | -4.165921 |
| Mg | 0.250199  | 2.475337  | -2.902352 |
| Mg | 3.185375  | 0.361094  | -2.625227 |
| Mg | 1.841002  | -2.972178 | -1.956673 |
| Mg | -4.324671 | -1.656642 | -1.006994 |
| Mg | -4.017721 | 1.748242  | 0.215935  |
| Mg | 0.629472  | 3.463367  | 2.337391  |
| Mg | 3.515398  | 1.310083  | 2.490601  |
| Mg | 2.279083  | -1.986088 | 3.176340  |
| Mg | -1.260431 | -1.662346 | 3.471966  |

20

Al11Mg9

|    |           |           |           |
|----|-----------|-----------|-----------|
| Al | -2.395231 | -0.451152 | -1.010292 |
| Al | -1.197390 | 1.887756  | -0.204733 |
| Al | -1.047187 | -0.414551 | 1.309607  |
| Al | -0.870443 | 1.960788  | 2.519005  |
| Al | -0.688713 | -2.528821 | -0.303412 |
| Al | 0.261787  | -0.208771 | -1.245597 |
| Al | 0.798262  | -0.070756 | 3.210223  |
| Al | 1.183182  | 2.294304  | -1.515694 |
| Al | 1.227654  | 1.342229  | 0.981263  |
| Al | 1.500950  | -1.397425 | 0.913015  |
| Al | 2.869743  | 0.240896  | -0.817058 |
| Mg | -3.801049 | 1.167677  | 1.439166  |
| Mg | -3.474917 | -2.445602 | 1.200998  |
| Mg | -1.400964 | 1.575874  | -3.330407 |
| Mg | -1.098583 | -2.063729 | -3.413813 |
| Mg | -0.314345 | -3.077229 | 2.883471  |
| Mg | 0.458559  | 4.392628  | 0.843911  |
| Mg | 1.968474  | 0.304352  | -3.857294 |
| Mg | 2.140318  | -2.735763 | -1.863419 |
| Mg | 3.879893  | 0.227296  | 2.261059  |

20

Al12Mg8

|    |           |           |           |
|----|-----------|-----------|-----------|
| Al | -2.558938 | 0.443717  | -0.580075 |
| Al | -1.748512 | -1.606141 | 1.190808  |
| Al | -1.306799 | 0.151161  | -3.010827 |
| Al | -0.669697 | 0.859040  | 1.323620  |
| Al | -0.329130 | 1.911007  | -1.232055 |
| Al | -0.217456 | -0.896123 | -0.844459 |
| Al | 0.845101  | 3.038034  | 0.979207  |
| Al | 1.012564  | -1.354132 | 1.525194  |
| Al | 1.413803  | 0.321426  | -2.635990 |
| Al | 1.651332  | 1.052220  | 2.641776  |
| Al | 1.897729  | 0.785090  | -0.012213 |
| Al | 2.306238  | -1.696612 | -0.930687 |
| Mg | -3.641506 | 0.616776  | 2.397695  |
| Mg | -2.805512 | -2.469380 | -1.765093 |
| Mg | -2.340994 | 3.473141  | 0.611373  |
| Mg | -0.666852 | -0.651467 | 4.110585  |
| Mg | 0.130661  | -3.947191 | -0.054028 |
| Mg | 0.441932  | -2.564922 | -3.455532 |
| Mg | 2.455345  | 3.287352  | -1.840413 |
| Mg | 4.130690  | -0.752996 | 1.581112  |

20

Al13Mg7

|    |           |           |           |
|----|-----------|-----------|-----------|
| Al | -2.533828 | 1.416870  | -0.353463 |
| Al | -2.344312 | -0.871922 | 1.101807  |
| Al | -2.008042 | -0.943646 | -1.595988 |
| Al | -0.645761 | 2.577586  | 1.221396  |
| Al | -0.452754 | 0.290948  | 2.679605  |
| Al | -0.309633 | 2.505852  | -1.475661 |
| Al | -0.114919 | 0.214096  | -0.020017 |
| Al | 0.068409  | -2.069896 | 1.443491  |
| Al | 0.220285  | 0.147366  | -2.720258 |
| Al | 0.406933  | -2.142088 | -1.272279 |
| Al | 1.772076  | 1.380234  | 1.557147  |

|    |           |           |           |
|----|-----------|-----------|-----------|
| Al | 2.108844  | 1.308376  | -1.144913 |
| Al | 2.308058  | -0.973358 | 0.313577  |
| Mg | -3.314968 | 1.694628  | 2.725249  |
| Mg | -2.534150 | 1.527998  | -3.539915 |
| Mg | -2.080024 | -3.792453 | -0.158456 |
| Mg | 1.851768  | 4.224289  | 0.118438  |
| Mg | 2.217644  | -4.131509 | 0.386246  |
| Mg | 2.302039  | -1.098478 | 3.496906  |
| Mg | 3.082335  | -1.264893 | -2.762914 |

20

Al14Mg6

|    |           |           |           |
|----|-----------|-----------|-----------|
| Al | -2.514365 | 0.925101  | -0.803720 |
| Al | -2.089938 | 0.389187  | 1.817961  |
| Al | -1.933464 | -1.635918 | -1.420788 |
| Al | -1.509114 | -2.171622 | 1.200038  |
| Al | -0.569983 | 0.402723  | -2.702668 |
| Al | -0.249096 | 2.408975  | -0.874470 |
| Al | -0.136238 | -0.150701 | -0.008695 |
| Al | 0.177444  | 1.870327  | 1.760832  |
| Al | 0.302512  | -0.698581 | 2.685581  |
| Al | 0.704602  | -1.921378 | -1.906749 |
| Al | 1.129065  | -2.457313 | 0.714920  |
| Al | 1.940743  | 0.472537  | -1.624844 |
| Al | 2.216970  | 2.451905  | 0.142399  |
| Al | 2.367461  | -0.066258 | 1.010403  |
| Mg | -4.473624 | -1.247228 | 0.469409  |
| Mg | -2.488408 | 3.482433  | 1.114710  |
| Mg | -0.754959 | -4.535585 | -0.804839 |
| Mg | 1.484547  | 2.985041  | -3.370883 |
| Mg | 2.619200  | 1.553979  | 3.633506  |
| Mg | 3.776646  | -2.057625 | -1.032100 |

20

Al15Mg5

|    |           |           |           |
|----|-----------|-----------|-----------|
| Al | 0.836983  | 0.344665  | -3.074626 |
| Al | -1.501435 | -0.183740 | -1.800108 |
| Al | 2.807473  | 0.882967  | -1.269299 |
| Al | 0.355339  | 1.889517  | -0.951273 |
| Al | 1.094317  | -1.119747 | -0.860533 |
| Al | -2.311714 | 2.012916  | -0.214331 |
| Al | -1.250685 | -2.414837 | -0.091992 |
| Al | -3.268893 | -0.549013 | 0.320023  |
| Al | -0.685750 | 0.083521  | 0.723574  |
| Al | 1.843191  | 0.729993  | 1.264195  |
| Al | -0.265585 | 2.571904  | 1.660287  |
| Al | 0.833575  | -1.845427 | 1.817597  |
| Al | -2.511889 | 1.116409  | 2.408783  |
| Al | -1.844222 | -1.582998 | 2.484948  |
| Al | -0.002832 | 0.343256  | 3.312347  |
| Mg | -1.568752 | 2.564452  | -3.337631 |
| Mg | -0.287638 | -2.724030 | -3.198369 |
| Mg | 1.342403  | -4.211990 | -0.209238 |
| Mg | 2.533681  | 3.685175  | 0.420872  |
| Mg | 3.852432  | -1.592994 | 0.594774  |

20

Al16Mg4

|    |           |           |           |
|----|-----------|-----------|-----------|
| Al | 0.138998  | -0.379361 | -3.385848 |
| Al | -0.350056 | -2.683224 | -1.936414 |
| Al | 0.620068  | 1.701890  | -1.698522 |
| Al | 1.723202  | -1.016827 | -1.322343 |
| Al | -1.289630 | -0.338254 | -1.152815 |
| Al | 2.939065  | 1.264069  | -0.203271 |
| Al | -2.324507 | -2.494751 | -0.009285 |
| Al | -1.553760 | 2.052431  | 0.152224  |
| Al | 0.537462  | 0.391055  | 0.637117  |
| Al | 0.983389  | 3.049043  | 0.694759  |
| Al | 0.250565  | -2.281361 | 0.696102  |
| Al | 2.701673  | -1.079221 | 1.294993  |
| Al | -1.818834 | -0.392364 | 1.644315  |
| Al | 2.245149  | 1.364015  | 2.492577  |
| Al | -0.481939 | 1.790784  | 2.703190  |
| Al | 0.559008  | -0.779652 | 3.058910  |
| Mg | 3.146122  | 0.870514  | -3.406160 |
| Mg | -2.198401 | 1.954284  | -3.069888 |
| Mg | -4.237914 | 0.202952  | -0.274477 |

|         |           |           |           |
|---------|-----------|-----------|-----------|
| Mg      | -1.589657 | -3.196023 | 3.084836  |
| 20      |           |           |           |
| Al17Mg3 |           |           |           |
| Al      | 1.228284  | 1.888938  | -3.186518 |
| Al      | 2.820390  | 0.165589  | -1.703920 |
| Al      | -0.744915 | 2.849253  | -1.487367 |
| Al      | -1.427757 | -1.782565 | -1.414801 |
| Al      | 0.206278  | 0.381504  | -1.331632 |
| Al      | 1.352193  | -2.041202 | -0.616738 |
| Al      | 1.840691  | 2.494994  | -0.614617 |
| Al      | -2.374677 | 0.764096  | -0.390384 |
| Al      | -0.724842 | -3.361183 | 0.759977  |
| Al      | -2.965259 | -1.674775 | 0.896105  |
| Al      | -0.484298 | -0.716782 | 0.909637  |
| Al      | 2.062629  | 0.210016  | 0.914632  |
| Al      | -0.292337 | 1.982680  | 1.057683  |
| Al      | 1.343047  | -2.164917 | 2.201780  |
| Al      | -2.272739 | 0.556775  | 2.421392  |
| Al      | -1.283413 | -1.956845 | 3.120440  |
| Al      | 0.409682  | 0.285387  | 3.208594  |
| Mg      | 0.928527  | -1.445850 | -3.756857 |
| Mg      | -1.930830 | 0.706535  | -3.583239 |
| Mg      | 2.309343  | 2.858352  | 2.595834  |
| 20      |           |           |           |
| Al18Mg2 |           |           |           |
| Al      | -0.341139 | 1.138887  | -3.299991 |
| Al      | -2.331663 | -0.588447 | -2.338967 |
| Al      | 0.377680  | -1.318061 | -2.137515 |
| Al      | -2.596572 | 2.163130  | -1.947370 |
| Al      | 1.865411  | 1.168128  | -1.542529 |
| Al      | -0.040886 | 3.220154  | -1.451030 |
| Al      | -0.725231 | 0.765286  | -0.711151 |
| Al      | 0.990078  | -3.189555 | -0.000147 |
| Al      | -1.394036 | -1.800730 | 0.008608  |
| Al      | -3.201505 | 0.371642  | 0.157122  |
| Al      | 1.127843  | -0.609046 | 0.391550  |
| Al      | -1.802244 | 2.759559  | 0.669246  |
| Al      | 3.329359  | 0.695698  | 0.898837  |
| Al      | 0.965986  | 2.158631  | 0.970968  |
| Al      | 2.807175  | -1.981030 | 1.829597  |
| Al      | -1.027548 | 0.403388  | 1.969360  |
| Al      | 0.084701  | -2.112730 | 2.375191  |
| Al      | 1.548722  | 0.206059  | 2.929840  |
| Mg      | 3.532314  | -1.645903 | -1.370477 |
| Mg      | -3.168447 | -1.805061 | 2.598854  |
| 20      |           |           |           |
| Al19Mg1 |           |           |           |
| Al      | -0.586701 | -0.519959 | -3.107354 |
| Al      | -1.246132 | 2.237503  | -2.942136 |
| Al      | 1.422066  | 1.415875  | -2.679709 |
| Al      | -2.872881 | 0.329247  | -1.686984 |
| Al      | 1.549203  | -1.027492 | -1.319209 |
| Al      | 0.406093  | 3.370108  | -0.948747 |
| Al      | -0.416639 | 0.861323  | -0.859747 |
| Al      | -1.304052 | -1.749396 | -0.659707 |
| Al      | -2.239294 | 2.700798  | -0.337265 |
| Al      | 2.144745  | 1.390745  | 0.078540  |
| Al      | 0.899238  | -3.019911 | 0.584720  |
| Al      | -2.291224 | 0.268382  | 1.103818  |
| Al      | 2.945053  | -1.146444 | 1.104538  |
| Al      | 0.383382  | -0.484707 | 1.128145  |
| Al      | -0.193546 | 2.192356  | 1.562357  |
| Al      | -1.349895 | -2.233132 | 2.097289  |
| Al      | 1.929587  | 0.806775  | 2.836985  |
| Al      | 1.216932  | -1.906537 | 3.177982  |
| Al      | -0.715796 | 0.137530  | 3.448376  |
| Mg      | 0.319859  | -3.623063 | -2.581893 |
| 20      |           |           |           |
| Al20Mg0 |           |           |           |
| Al      | -3.078800 | 0.854905  | -1.991049 |
| Al      | -2.336517 | -0.027625 | 0.379625  |
| Al      | -1.947806 | -1.646758 | -1.967598 |
| Al      | -1.840188 | -2.742126 | 0.677845  |
| Al      | -1.747756 | 2.672894  | -0.422249 |

|    |           |           |           |
|----|-----------|-----------|-----------|
| Al | -1.628382 | 1.832284  | 2.314304  |
| Al | -0.510711 | -0.822944 | 2.366452  |
| Al | -0.449984 | 0.801330  | -2.181648 |
| Al | -0.050192 | -3.695119 | -1.232836 |
| Al | 0.082495  | -1.223965 | -0.335359 |
| Al | 0.192320  | 1.147653  | 0.513071  |
| Al | 0.288976  | 3.628798  | 1.387301  |
| Al | 0.771680  | -1.594453 | -2.868311 |
| Al | 0.828692  | -3.100823 | 1.388755  |
| Al | 0.983530  | 2.979999  | -1.231803 |
| Al | 1.038940  | 1.439594  | 3.013063  |
| Al | 2.168874  | -0.602207 | 1.402568  |
| Al | 2.180133  | 0.359405  | -1.286870 |
| Al | 2.422212  | -2.400639 | -0.774791 |
| Al | 2.632484  | 2.139798  | 0.849531  |

25  
Al0Mg25

|    |           |           |           |
|----|-----------|-----------|-----------|
| Mg | -4.732074 | -1.958839 | 0.492657  |
| Mg | -3.854306 | 1.382333  | 1.760887  |
| Mg | -3.114646 | -1.640895 | 3.864050  |
| Mg | -3.207138 | 0.570078  | -1.711781 |
| Mg | -3.199549 | 4.082296  | -1.151857 |
| Mg | -2.070806 | -4.306866 | 1.513797  |
| Mg | -2.098874 | -2.891469 | -1.935001 |
| Mg | -1.516710 | -1.010648 | 0.961419  |
| Mg | -1.479841 | -0.530065 | -4.746277 |
| Mg | -0.743230 | 2.307431  | 0.404931  |
| Mg | -0.554368 | 1.001237  | 3.690376  |
| Mg | -0.639269 | 2.748657  | -3.244269 |
| Mg | 0.195483  | -0.243327 | -1.816829 |
| Mg | 0.533380  | -2.443095 | 3.411941  |
| Mg | 0.448677  | 5.215167  | -0.910861 |
| Mg | 1.020120  | -3.263876 | -0.101731 |
| Mg | 1.144663  | -2.897123 | -3.713604 |
| Mg | 1.693919  | -0.013718 | 1.173316  |
| Mg | 2.157514  | 3.249061  | 2.157794  |
| Mg | 2.077178  | 0.574383  | -4.511490 |
| Mg | 2.503611  | 2.343369  | -1.334783 |
| Mg | 3.006862  | 0.259725  | 4.268025  |
| Mg | 3.577892  | -1.128813 | -1.560322 |
| Mg | 3.939786  | -2.440625 | 1.910454  |
| Mg | 4.911727  | 1.035621  | 1.129159  |

25  
Al1Mg24

|    |           |           |           |
|----|-----------|-----------|-----------|
| Al | 1.355807  | -0.978355 | 0.138732  |
| Mg | -1.024035 | -0.371493 | -4.853847 |
| Mg | -4.178356 | 0.368976  | -3.034565 |
| Mg | -2.711341 | -3.090432 | -3.002622 |
| Mg | -1.303532 | 2.776621  | -2.875833 |
| Mg | 1.685181  | 0.693732  | -2.680217 |
| Mg | 0.953435  | -2.652010 | -2.643544 |
| Mg | 1.964946  | 4.204903  | -1.790072 |
| Mg | 4.010713  | -1.534210 | -1.620971 |
| Mg | -1.281805 | -0.426577 | -1.475765 |
| Mg | 3.600436  | 1.400921  | 0.069801  |
| Mg | -1.118556 | 5.053916  | 0.101660  |
| Mg | 2.453284  | -4.013706 | 0.111279  |
| Mg | -4.075322 | -1.669022 | 0.114694  |
| Mg | -3.230378 | 2.029700  | 0.119662  |
| Mg | 0.287077  | 1.975597  | 0.132409  |
| Mg | -0.875204 | -3.353378 | 0.162397  |
| Mg | 4.081531  | -1.520610 | 1.780357  |
| Mg | -1.307827 | -0.391745 | 1.861039  |
| Mg | 2.076231  | 4.240109  | 1.904941  |
| Mg | 1.783735  | 0.717869  | 2.887992  |
| Mg | 1.056171  | -2.627875 | 2.894922  |
| Mg | -1.111505 | 2.869117  | 3.152748  |
| Mg | -2.452063 | -3.239281 | 3.342961  |
| Mg | -0.638624 | -0.462767 | 5.201843  |

25  
Al2Mg23

|    |           |           |           |
|----|-----------|-----------|-----------|
| Al | -1.826818 | -1.109091 | -1.613507 |
| Al | 1.281062  | 1.621981  | 1.702604  |
| Mg | -1.837209 | -2.245112 | -4.602318 |



|    |           |           |           |
|----|-----------|-----------|-----------|
| Mg | -2.301594 | 1.078050  | -3.920441 |
| Mg | 0.755631  | -0.324812 | -3.459736 |
| Mg | -4.693400 | -1.191705 | -3.023818 |
| Mg | 0.292377  | -3.493127 | -2.224973 |
| Mg | -3.082699 | -4.028334 | -1.966288 |
| Mg | 3.694433  | -1.888719 | -1.907043 |
| Mg | -0.459108 | 1.904269  | -1.138024 |
| Mg | 2.969081  | 1.620268  | -1.097986 |
| Mg | -3.803531 | 1.351908  | -0.882680 |
| Mg | 0.968785  | -0.910371 | -0.158183 |
| Mg | 1.503235  | 4.421574  | 0.139319  |
| Mg | -4.304245 | -1.789201 | 0.318027  |
| Mg | -1.266562 | -3.220083 | 0.820123  |
| Mg | 2.359297  | -3.800316 | 0.918643  |
| Mg | -1.701169 | 0.125981  | 1.490602  |
| Mg | 3.831926  | -0.382727 | 1.551717  |
| Mg | -1.359204 | 3.499879  | 1.725426  |
| Mg | 4.155015  | 3.020603  | 1.791392  |
| Mg | 0.946772  | -1.275111 | 3.181740  |
| Mg | 1.468020  | 4.222691  | 3.550430  |
| Mg | -0.499533 | 1.554207  | 4.377655  |
| Mg | 2.909439  | 1.237297  | 4.427319  |

25  
Al3Mg22

|    |           |           |           |
|----|-----------|-----------|-----------|
| Al | -0.961443 | 0.488614  | 2.215886  |
| Al | -0.780551 | 0.448759  | -0.602097 |
| Al | 1.446409  | -0.767426 | -1.841797 |
| Mg | -3.884137 | 0.136540  | 3.570145  |
| Mg | -3.634403 | 0.127138  | -2.196044 |
| Mg | -3.397270 | 1.881290  | 0.692626  |
| Mg | -3.010395 | -1.486357 | 0.714962  |
| Mg | -2.221463 | 3.115266  | 3.634745  |
| Mg | -1.975909 | 3.098343  | -2.131597 |
| Mg | -1.562993 | -2.367181 | 3.657000  |
| Mg | -1.337284 | -2.359115 | -2.104560 |
| Mg | -1.055846 | 0.471061  | 5.455012  |
| Mg | -0.699837 | 0.474227  | -3.853023 |
| Mg | -0.329129 | 3.317172  | 0.819141  |
| Mg | 0.291729  | -2.145642 | 0.837290  |
| Mg | 0.965958  | -2.393454 | -4.603198 |
| Mg | 1.126008  | 2.450229  | 3.761475  |
| Mg | 1.344008  | 2.444404  | -2.000367 |
| Mg | 1.546185  | -0.943964 | 3.731001  |
| Mg | 1.594053  | -4.014055 | -1.663285 |
| Mg | 1.963387  | 0.849139  | 0.902241  |
| Mg | 2.628674  | 0.585254  | -4.538576 |
| Mg | 3.612738  | -2.022005 | 0.248440  |
| Mg | 4.048404  | -2.191564 | -3.146633 |
| Mg | 4.283108  | 0.803326  | -1.558788 |

25  
Al4Mg21

|    |           |           |           |
|----|-----------|-----------|-----------|
| Al | -1.535595 | -0.347878 | 0.562680  |
| Al | 0.327177  | 1.551145  | -0.171935 |
| Al | 0.381868  | -0.960385 | -1.314355 |
| Al | 1.068397  | -0.587448 | 1.283097  |
| Mg | -4.588431 | 0.029462  | -0.427488 |
| Mg | -3.696373 | 0.414104  | 2.844803  |
| Mg | -3.618925 | -2.683312 | 1.415959  |
| Mg | -2.606465 | 2.685437  | 0.503457  |
| Mg | -2.482407 | -2.331978 | -1.774915 |
| Mg | -1.983528 | 0.971943  | -2.343420 |
| Mg | -1.058066 | -1.711168 | 3.465121  |
| Mg | -0.638090 | 4.044765  | -1.971694 |
| Mg | -0.548737 | 1.596247  | 2.959012  |
| Mg | -0.531398 | -1.266494 | -4.398969 |
| Mg | -0.380339 | -3.388658 | 0.717242  |
| Mg | 0.251127  | 4.418460  | 1.311197  |
| Mg | 0.407521  | -3.969513 | -2.525601 |
| Mg | 1.234832  | 1.458400  | -3.256833 |
| Mg | 1.828377  | -0.359892 | 4.414445  |
| Mg | 2.623401  | 3.660683  | -1.011050 |
| Mg | 2.663441  | 2.061803  | 2.048012  |
| Mg | 2.723499  | -1.636642 | -3.439701 |
| Mg | 2.731177  | -2.921592 | -0.244236 |

|         |           |           |           |
|---------|-----------|-----------|-----------|
| Mg      | 3.290732  | 0.369793  | -0.799510 |
| Mg      | 4.136805  | -1.097281 | 2.154679  |
| 25      |           |           |           |
| Al5Mg20 |           |           |           |
| Al      | 0.845722  | -0.268066 | -1.393748 |
| Al      | -1.000407 | 1.554868  | -0.906102 |
| Al      | -1.436513 | -0.774739 | 0.256575  |
| Al      | 1.000410  | -1.554871 | 0.906096  |
| Al      | 0.590799  | 1.042803  | 1.137161  |
| Mg      | 1.021986  | -1.770026 | -4.165718 |
| Mg      | 0.122216  | 1.734364  | -3.861150 |
| Mg      | 3.405317  | 0.366735  | -3.130492 |
| Mg      | -1.972301 | -0.702693 | -2.943231 |
| Mg      | -2.473430 | 3.844416  | -2.240291 |
| Mg      | -0.298079 | -3.304796 | -1.426847 |
| Mg      | 2.988413  | -2.720335 | -1.265174 |
| Mg      | 1.923130  | 2.789705  | -1.251203 |
| Mg      | -4.074899 | 0.802566  | -0.826147 |
| Mg      | -3.610179 | -2.798434 | -0.816091 |
| Mg      | 3.597345  | 0.187583  | 0.265170  |
| Mg      | -0.346567 | 4.145115  | 0.793322  |
| Mg      | -1.208746 | -3.652118 | 1.769854  |
| Mg      | -2.462143 | 1.816154  | 1.919848  |
| Mg      | 2.887937  | 3.027319  | 2.006436  |
| Mg      | -3.909907 | -1.257292 | 2.159269  |
| Mg      | 2.473381  | -3.844403 | 2.240368  |
| Mg      | 2.519583  | -0.309598 | 3.389285  |
| Mg      | -0.787938 | -0.785958 | 3.436239  |
| Mg      | 0.204873  | 2.431702  | 3.946572  |
| 25      |           |           |           |
| Al6Mg19 |           |           |           |
| Al      | -1.728013 | -0.785805 | -0.997287 |
| Al      | -1.476565 | 1.099978  | 0.877688  |
| Al      | 0.224007  | -1.086690 | 0.905637  |
| Al      | 0.417197  | 0.922539  | -1.134627 |
| Al      | 0.642114  | -1.683831 | -1.663791 |
| Al      | 1.097330  | 1.373380  | 1.395152  |
| Mg      | -4.532197 | 0.319110  | -0.192814 |
| Mg      | -3.676040 | 1.726092  | 2.915326  |
| Mg      | -2.794705 | -1.647454 | 1.908058  |
| Mg      | -2.432735 | 2.202790  | -1.976208 |
| Mg      | -1.800140 | -3.055364 | -3.244517 |
| Mg      | -1.162654 | -3.831418 | -0.082319 |
| Mg      | -0.808906 | 0.023831  | -3.982113 |
| Mg      | -0.581294 | 0.072247  | 3.808802  |
| Mg      | -0.566355 | 3.351340  | 3.170017  |
| Mg      | -0.240236 | 3.909788  | -0.085248 |
| Mg      | 0.107536  | -3.274558 | 3.110340  |
| Mg      | 0.711205  | 3.089396  | -3.342520 |
| Mg      | 1.905938  | -3.704529 | -3.525938 |
| Mg      | 2.204610  | -3.581529 | 0.292474  |
| Mg      | 2.543825  | 0.078425  | -3.436205 |
| Mg      | 2.616685  | -0.819733 | 3.068292  |
| Mg      | 2.954258  | 2.874652  | -0.653032 |
| Mg      | 3.143795  | 2.860994  | 3.065050  |
| Mg      | 3.231341  | -0.433651 | -0.200215 |
| 25      |           |           |           |
| Al7Mg18 |           |           |           |
| Al      | -2.123468 | 0.887783  | 0.028835  |
| Al      | -0.849619 | -0.580221 | 1.918980  |
| Al      | -0.745730 | -1.352970 | -0.655388 |
| Al      | -0.545643 | 0.869396  | -2.178892 |
| Al      | 0.607035  | 1.011643  | 0.284905  |
| Al      | 1.479474  | -1.518442 | 0.896507  |
| Al      | 1.649826  | -0.596855 | -1.650194 |
| Mg      | -4.055182 | 3.167797  | 0.693936  |
| Mg      | -3.599969 | 0.492859  | 2.959518  |
| Mg      | -3.543496 | -1.956079 | 0.705572  |
| Mg      | -3.314214 | -0.832367 | -2.446349 |
| Mg      | -3.180078 | 2.488139  | -2.662540 |
| Mg      | -1.005679 | 2.572486  | 2.551233  |
| Mg      | -0.794316 | -3.792030 | 1.367548  |
| Mg      | -0.759461 | 3.721767  | -0.700071 |
| Mg      | -0.426569 | -1.986696 | -3.738832 |

|    |          |           |           |
|----|----------|-----------|-----------|
| Mg | 0.676972 | -2.363516 | 3.989660  |
| Mg | 1.137094 | -3.805154 | -1.374599 |
| Mg | 1.502461 | 0.587250  | -4.610426 |
| Mg | 1.799262 | 0.699227  | 3.226712  |
| Mg | 2.077485 | 3.581548  | 1.305712  |
| Mg | 2.194710 | 2.559543  | -2.015299 |
| Mg | 3.779911 | 0.690161  | 0.393072  |
| Mg | 3.928217 | -2.163912 | 2.616805  |
| Mg | 4.110978 | -2.381357 | -0.906406 |

25

Al8Mg17

|    |           |           |           |
|----|-----------|-----------|-----------|
| Al | -1.218120 | 1.174040  | 2.351203  |
| Al | -1.180088 | 0.132097  | -0.090093 |
| Al | -0.421519 | -0.978184 | -2.447318 |
| Al | -0.281484 | -2.430932 | -0.152491 |
| Al | 0.296977  | 1.576839  | -1.854024 |
| Al | 0.539367  | -0.801081 | 1.881183  |
| Al | 0.905173  | 1.733121  | 0.805270  |
| Al | 1.548576  | -0.494045 | -0.637231 |
| Mg | -4.069341 | 0.991222  | 0.951190  |
| Mg | -3.297422 | -1.910653 | -1.249233 |
| Mg | -2.851272 | 1.180413  | -2.561450 |
| Mg | -2.568352 | -1.798396 | 2.052082  |
| Mg | -1.837555 | 3.264320  | -0.097180 |
| Mg | -1.196511 | -4.052476 | -2.733636 |
| Mg | -0.797920 | -0.852861 | 4.758650  |
| Mg | -0.460052 | 1.050478  | -4.900203 |
| Mg | -0.079442 | 4.123162  | 2.646124  |
| Mg | 0.004913  | -3.837888 | 2.689964  |
| Mg | 1.201689  | 4.453339  | -0.830126 |
| Mg | 1.527106  | 1.462631  | 3.964587  |
| Mg | 1.999309  | -3.132687 | -2.346909 |
| Mg | 2.443342  | -0.055933 | -3.653225 |
| Mg | 2.731580  | -2.982942 | 0.941884  |
| Mg | 3.449864  | 1.993495  | -1.170993 |
| Mg | 3.611180  | 0.192918  | 1.681973  |

25

Al9Mg16

|    |           |           |           |
|----|-----------|-----------|-----------|
| Al | -2.322593 | 0.454462  | -1.431757 |
| Al | -1.957595 | 1.615716  | 1.099178  |
| Al | -1.462425 | -1.007303 | 0.673078  |
| Al | -0.329021 | -1.342596 | -1.814899 |
| Al | 0.099069  | 1.071738  | -0.506026 |
| Al | 0.251524  | 0.504419  | 2.210648  |
| Al | 1.243185  | -1.364298 | 0.446685  |
| Al | 2.095062  | -0.128442 | -1.801407 |
| Al | 2.460062  | 1.032816  | 0.729543  |
| Mg | -4.609513 | -0.001394 | 0.665405  |
| Mg | -3.333655 | -2.562292 | -1.336983 |
| Mg | -2.632466 | -0.331462 | 3.525105  |
| Mg | -2.342426 | -1.016694 | -4.225682 |
| Mg | -1.829586 | 3.560851  | -1.369964 |
| Mg | -1.164180 | 2.731911  | 3.944410  |
| Mg | -0.526475 | -3.985900 | -0.006393 |
| Mg | -0.103751 | 1.489304  | -3.588670 |
| Mg | -0.078782 | -2.561603 | 3.097839  |
| Mg | 0.580292  | 3.665682  | 1.154717  |
| Mg | 1.278551  | -1.494517 | -4.528657 |
| Mg | 2.296301  | -3.305153 | -1.808039 |
| Mg | 2.435941  | 2.998020  | -1.726848 |
| Mg | 2.456788  | 2.254122  | 3.641441  |
| Mg | 2.997498  | -1.074326 | 3.053997  |
| Mg | 4.498192  | -1.203061 | -0.096724 |

25

Al10Mg15

|    |           |           |           |
|----|-----------|-----------|-----------|
| Al | -2.690413 | 0.127630  | 0.615973  |
| Al | -1.664994 | -2.120650 | -0.731231 |
| Al | -1.203248 | 0.598350  | 2.905975  |
| Al | -1.052241 | 0.415574  | -1.544378 |
| Al | -0.762799 | 2.074061  | 0.658223  |
| Al | -0.141354 | -0.687269 | 0.870643  |
| Al | 0.922977  | -1.532867 | -1.478796 |
| Al | 1.385191  | 1.158355  | 2.091296  |
| Al | 1.468612  | 1.053073  | -0.631858 |

|    |           |           |           |
|----|-----------|-----------|-----------|
| Al | 2.462216  | -1.076906 | 0.762809  |
| Mg | -4.104469 | -0.656734 | -2.071716 |
| Mg | -3.471874 | 2.680596  | 2.316320  |
| Mg | -3.312739 | 2.650842  | -1.191909 |
| Mg | -2.369202 | -2.377485 | 2.465603  |
| Mg | -1.292788 | -1.696116 | -3.871049 |
| Mg | -0.199168 | 3.508351  | 3.500909  |
| Mg | -0.091841 | -4.431800 | -2.199490 |
| Mg | -0.079290 | 3.400869  | -2.156962 |
| Mg | 0.546841  | -3.707488 | 1.079469  |
| Mg | 1.108526  | -1.497956 | 3.724526  |
| Mg | 1.207880  | 0.653460  | -3.793196 |
| Mg | 1.831780  | 3.951842  | 0.670264  |
| Mg | 3.270231  | -3.581581 | -0.982375 |
| Mg | 3.934062  | -0.374348 | -1.978962 |
| Mg | 4.298101  | 1.468195  | 0.969911  |

|          |           |           |           |
|----------|-----------|-----------|-----------|
| 25       |           |           |           |
| Al11Mg14 |           |           |           |
| Al       | -1.668195 | -0.243305 | 0.947984  |
| Al       | -1.478965 | 0.344368  | -1.784642 |
| Al       | -1.344422 | -2.276960 | -0.892409 |
| Al       | -0.146316 | 1.925688  | 0.105305  |
| Al       | 0.060226  | -2.304990 | 1.572185  |
| Al       | 0.353371  | -1.373664 | -2.897488 |
| Al       | 0.696386  | -0.645643 | -0.404221 |
| Al       | 0.784898  | 0.299172  | 2.187529  |
| Al       | 1.109540  | 1.220466  | -2.251211 |
| Al       | 2.514204  | 1.192420  | 0.213382  |
| Al       | 2.659410  | -1.419653 | 1.148634  |
| Mg       | -4.229195 | -0.968632 | -0.813313 |
| Mg       | -3.316322 | 2.298126  | -0.074023 |
| Mg       | -2.970741 | -3.139594 | 1.657350  |
| Mg       | -2.603848 | -1.934988 | -3.776136 |
| Mg       | -1.604068 | 2.263950  | 2.930248  |
| Mg       | -1.465384 | -1.023859 | 4.036108  |
| Mg       | -1.137747 | 3.437358  | -2.525067 |
| Mg       | -0.644138 | 0.858106  | -4.861276 |
| Mg       | 1.530607  | -3.699725 | -0.914373 |
| Mg       | 1.626120  | 3.382196  | 2.324311  |
| Mg       | 1.902581  | -2.024950 | 4.130755  |
| Mg       | 2.040250  | 4.002284  | -1.117273 |
| Mg       | 3.469527  | -0.936352 | -1.988087 |
| Mg       | 3.862221  | 0.768180  | 3.045730  |

|          |           |           |           |
|----------|-----------|-----------|-----------|
| 25       |           |           |           |
| Al12Mg13 |           |           |           |
| Al       | 0.590326  | 1.569683  | -2.751006 |
| Al       | 0.863173  | -1.174203 | -2.521956 |
| Al       | -1.150782 | 0.118604  | -1.304065 |
| Al       | 1.599598  | 0.457524  | -0.520503 |
| Al       | -0.218082 | 2.555314  | -0.339809 |
| Al       | 0.217675  | -1.900418 | 0.057950  |
| Al       | -2.696696 | 1.519737  | 0.401777  |
| Al       | -2.392061 | -1.261819 | 0.673835  |
| Al       | -0.462561 | 0.501286  | 1.406805  |
| Al       | 1.672252  | 2.058142  | 1.646459  |
| Al       | 1.905081  | -0.732289 | 1.898055  |
| Al       | -0.540031 | -1.803158 | 2.675483  |
| Mg       | -1.443243 | -0.158117 | -4.451107 |
| Mg       | 3.538421  | 0.455651  | -3.031867 |
| Mg       | -2.422357 | 2.775704  | -2.569968 |
| Mg       | -1.848473 | -2.879450 | -2.132107 |
| Mg       | -4.272897 | -0.257471 | -1.683866 |
| Mg       | 2.708267  | 3.407935  | -1.108313 |
| Mg       | 3.278943  | -2.247627 | -0.671297 |
| Mg       | 4.454870  | 0.818101  | 0.802645  |
| Mg       | -1.652904 | -4.298514 | 1.102130  |
| Mg       | 1.755863  | -3.878452 | 2.073337  |
| Mg       | -1.147678 | 3.379570  | 2.566547  |
| Mg       | -2.933948 | 0.269570  | 3.387424  |
| Mg       | 0.597243  | 0.704695  | 4.393419  |

|          |          |           |           |
|----------|----------|-----------|-----------|
| 25       |          |           |           |
| Al13Mg12 |          |           |           |
| Al       | 1.271601 | 0.575418  | -2.789427 |
| Al       | 0.316034 | -1.844833 | -1.823258 |

|    |           |           |           |
|----|-----------|-----------|-----------|
| Al | -0.858986 | 0.542593  | -1.209097 |
| Al | -2.426564 | -1.618563 | -1.175186 |
| Al | 0.976001  | 2.503537  | -0.775520 |
| Al | 1.735130  | -0.058831 | -0.207069 |
| Al | -1.738870 | 2.776498  | -0.089560 |
| Al | 1.745415  | -2.691432 | 0.396777  |
| Al | -0.568993 | -1.441880 | 0.728610  |
| Al | -2.641162 | 0.334764  | 0.855403  |
| Al | -0.076596 | 1.275782  | 1.424232  |
| Al | 1.449757  | -0.763117 | 2.414947  |
| Al | -1.220145 | -0.470536 | 3.109710  |
| Mg | -1.469886 | -0.588237 | -4.106377 |
| Mg | -0.924459 | 2.954562  | -3.249929 |
| Mg | 3.423678  | -1.816778 | -2.260783 |
| Mg | -3.884031 | 1.178192  | -1.929566 |
| Mg | 3.952565  | 1.737623  | -1.580173 |
| Mg | -0.915471 | -4.385101 | -0.398887 |
| Mg | 4.368094  | -1.134755 | 1.199628  |
| Mg | 0.291358  | 4.435014  | 1.650681  |
| Mg | -3.313522 | -2.601433 | 1.799239  |
| Mg | 2.931294  | 2.067135  | 1.855987  |
| Mg | 0.022847  | -3.497932 | 3.055234  |
| Mg | -2.445088 | 2.532308  | 3.104382  |

25

Al14Mg11

|    |           |           |           |
|----|-----------|-----------|-----------|
| Al | -0.943186 | 1.461497  | -2.733731 |
| Al | -0.056330 | -1.233877 | -2.647461 |
| Al | 2.603700  | -1.296105 | -1.740669 |
| Al | 1.057199  | 0.771949  | -1.116221 |
| Al | -1.775959 | -2.713032 | -0.987192 |
| Al | -1.585902 | -0.083167 | -0.661442 |
| Al | -0.826079 | 2.495678  | -0.108397 |
| Al | 0.574475  | -1.819392 | -0.082297 |
| Al | 1.817854  | 2.415942  | 0.846040  |
| Al | 2.658716  | -0.272702 | 0.858374  |
| Al | 0.105429  | 0.479536  | 1.514450  |
| Al | -2.508976 | 1.016039  | 1.590531  |
| Al | -1.613235 | -1.654851 | 1.593383  |
| Al | 1.022069  | -1.800613 | 2.554559  |
| Mg | 1.887934  | 0.748609  | -4.165955 |
| Mg | -3.131913 | -0.875280 | -3.302249 |
| Mg | 1.279279  | 3.767766  | -2.083592 |
| Mg | 4.121710  | 1.541585  | -1.279753 |
| Mg | -3.757893 | 2.138076  | -1.216837 |
| Mg | -4.413502 | -1.219919 | 0.188843  |
| Mg | 3.187610  | -3.389155 | 0.680961  |
| Mg | -0.292940 | -4.515267 | 1.279618  |
| Mg | -0.535155 | 3.223587  | 2.951058  |
| Mg | 2.297855  | 0.967986  | 3.735418  |
| Mg | -1.172759 | -0.154890 | 4.332563  |

25

Al15Mg10

|    |           |           |           |
|----|-----------|-----------|-----------|
| Al | -3.169772 | 0.241110  | 1.650241  |
| Al | -2.727069 | -0.651284 | -0.954499 |
| Al | -1.891545 | 1.450390  | -2.595944 |
| Al | -1.583264 | 1.703037  | 0.067984  |
| Al | -0.877331 | -0.936231 | 1.066673  |
| Al | -0.780823 | 1.273584  | 2.669473  |
| Al | -0.732449 | -2.733026 | -0.959777 |
| Al | -0.128005 | -0.150128 | -1.464150 |
| Al | 0.508524  | 2.470378  | -1.601796 |
| Al | 1.030866  | 1.116287  | 0.689398  |
| Al | 1.249953  | -0.723369 | 2.696690  |
| Al | 1.442862  | -1.976575 | -2.536091 |
| Al | 1.601157  | -1.682047 | 0.136656  |
| Al | 2.510724  | 0.397565  | -1.519974 |
| Al | 3.409822  | 0.040419  | 1.095605  |
| Mg | -4.588245 | 1.895642  | -0.794840 |
| Mg | -3.272742 | -2.985084 | 1.093176  |
| Mg | -1.667023 | -1.395484 | 4.076831  |
| Mg | -1.625728 | -1.618095 | -3.824441 |
| Mg | 0.070401  | 4.095675  | 1.212884  |
| Mg | 0.211115  | -3.765543 | 2.006666  |
| Mg | 0.915983  | 0.785773  | -4.293149 |

|         |           |           |           |
|---------|-----------|-----------|-----------|
| Mg      | 2.317505  | 2.158426  | 3.364114  |
| Mg      | 3.358840  | 3.085937  | -0.109073 |
| Mg      | 4.416244  | -2.097355 | -1.172655 |
| 25      |           |           |           |
| Al16Mg9 |           |           |           |
| Al      | -3.121755 | 0.433742  | -1.199623 |
| Al      | -1.985033 | 1.757634  | 0.988569  |
| Al      | -1.583507 | -0.961495 | 0.487506  |
| Al      | -1.329255 | -0.026798 | 3.023343  |
| Al      | -1.296746 | -1.469486 | -2.167848 |
| Al      | -0.546015 | 1.064011  | -1.275998 |
| Al      | -0.509771 | -3.367551 | -0.130810 |
| Al      | -0.225075 | 2.524659  | 2.876413  |
| Al      | 0.338770  | 3.125908  | 0.224194  |
| Al      | 0.546208  | -1.968289 | 2.023344  |
| Al      | 0.580647  | 0.644285  | 1.246358  |
| Al      | 0.956957  | -1.197778 | -0.695304 |
| Al      | 1.041420  | -0.099475 | -3.093382 |
| Al      | 2.205072  | 1.221561  | -0.866360 |
| Al      | 2.209747  | -3.256922 | 0.324976  |
| Al      | 2.895721  | -0.711225 | 1.153739  |
| Mg      | -4.348388 | -0.177630 | 1.767623  |
| Mg      | -2.384534 | 3.614944  | -1.519817 |
| Mg      | -2.305947 | -3.161821 | 2.600179  |
| Mg      | -1.846017 | 0.948365  | -4.145895 |
| Mg      | 0.986509  | 3.186563  | -3.006001 |
| Mg      | 1.167879  | -3.432499 | -2.874750 |
| Mg      | 1.687463  | 0.116514  | 4.156515  |
| Mg      | 2.990733  | 2.540415  | 1.950593  |
| Mg      | 3.874916  | -1.347633 | -1.847564 |
| 25      |           |           |           |
| Al17Mg8 |           |           |           |
| Al      | -2.342299 | 1.681172  | 0.917412  |
| Al      | -2.121611 | -1.671974 | -2.323001 |
| Al      | -2.099533 | 1.095679  | -1.883037 |
| Al      | -1.572535 | -0.730116 | 0.073095  |
| Al      | -0.309638 | 0.423424  | 2.291662  |
| Al      | -0.262684 | -2.370809 | 1.880106  |
| Al      | -0.077658 | 3.046857  | 1.844903  |
| Al      | -0.012629 | -2.856670 | -0.913644 |
| Al      | 0.042428  | 1.686688  | -0.405751 |
| Al      | 0.203725  | -0.357243 | -2.314706 |
| Al      | 1.075969  | -0.672629 | 0.233899  |
| Al      | 2.046481  | -0.992905 | 2.716740  |
| Al      | 2.202501  | 1.487683  | 1.389738  |
| Al      | 2.212115  | -3.022135 | 0.784583  |
| Al      | 2.484299  | -1.839506 | -1.731802 |
| Al      | 2.527029  | 0.955263  | -1.387880 |
| Al      | 3.729140  | -0.691981 | 0.506974  |
| Mg      | -4.591631 | -0.288473 | -0.558749 |
| Mg      | -3.080468 | -0.923349 | 2.827046  |
| Mg      | -2.835346 | -3.600705 | 0.254742  |
| Mg      | -1.712238 | 4.229451  | -0.811587 |
| Mg      | 0.414476  | -2.968135 | -4.021319 |
| Mg      | 0.453788  | 2.565359  | -3.398117 |
| Mg      | 1.526616  | 1.754451  | 4.443400  |
| Mg      | 2.099702  | 4.060604  | -0.414706 |
| 25      |           |           |           |
| Al18Mg7 |           |           |           |
| Al      | -1.561989 | 1.016179  | -2.645680 |
| Al      | -0.327547 | -1.496999 | -2.417557 |
| Al      | 2.472738  | -1.235499 | -2.093268 |
| Al      | 0.857984  | 0.952899  | -1.510475 |
| Al      | 1.173905  | -3.574764 | -1.260016 |
| Al      | -1.110451 | 2.536840  | -0.312422 |
| Al      | -1.606967 | -0.172801 | -0.268704 |
| Al      | -1.319531 | -2.917985 | -0.140091 |
| Al      | 0.813037  | -1.281088 | 0.007996  |
| Al      | 1.591577  | 3.008778  | 0.089318  |
| Al      | 2.963063  | 0.411986  | 0.192262  |
| Al      | 3.188669  | -2.404401 | 0.336179  |
| Al      | 0.475610  | 0.938907  | 1.347641  |
| Al      | 0.875995  | -3.456150 | 1.526429  |
| Al      | -2.122550 | 1.245317  | 1.963702  |

|    |           |           |           |
|----|-----------|-----------|-----------|
| Al | -0.257951 | 3.305517  | 2.139972  |
| Al | -0.835188 | -1.350032 | 2.194590  |
| Al | 1.984824  | -1.049883 | 2.457797  |
| Mg | 1.039735  | 0.349536  | -4.573297 |
| Mg | 0.319875  | 3.728395  | -2.850692 |
| Mg | -3.461517 | -1.674999 | -2.303464 |
| Mg | -4.113804 | 1.672846  | -0.627359 |
| Mg | -3.872367 | -1.520193 | 1.421358  |
| Mg | 2.886435  | 2.149161  | 2.906589  |
| Mg | -0.053584 | 0.818432  | 4.419192  |

25  
Al19Mg6

|    |           |           |           |
|----|-----------|-----------|-----------|
| Al | -2.703955 | -1.783016 | -0.662418 |
| Al | -2.358078 | -0.027633 | 1.672979  |
| Al | -2.063122 | 2.599951  | 0.883271  |
| Al | -1.559570 | 0.679658  | -1.013277 |
| Al | -1.058137 | 1.689567  | 3.388501  |
| Al | -0.618097 | -3.746541 | -0.558295 |
| Al | -0.436944 | -1.614312 | -2.294050 |
| Al | -0.354074 | -1.360090 | 0.466534  |
| Al | -0.012917 | 1.091760  | -3.193154 |
| Al | 0.022250  | -0.848175 | 3.100657  |
| Al | 0.134618  | 1.162006  | 1.123497  |
| Al | 0.201000  | 2.807983  | -1.003974 |
| Al | 1.042594  | -3.186621 | 1.714980  |
| Al | 1.294008  | 0.120511  | -1.080054 |
| Al | 1.753847  | 1.323787  | 3.164787  |
| Al | 1.831136  | -2.509728 | -0.818757 |
| Al | 2.247717  | -0.721017 | 1.396093  |
| Al | 2.442446  | 2.087141  | -2.329351 |
| Al | 2.579080  | 1.996155  | 0.459797  |
| Mg | -4.601160 | 0.896202  | -0.332781 |
| Mg | -2.979901 | -0.314407 | -3.608971 |
| Mg | -2.165968 | -3.196754 | 2.283430  |
| Mg | 0.616451  | 4.153779  | 1.956519  |
| Mg | 2.357456  | -1.010937 | -3.781758 |
| Mg | 4.389323  | -0.289271 | -0.934206 |

25  
Al20Mg5

|    |           |           |           |
|----|-----------|-----------|-----------|
| Al | 0.758538  | -0.952818 | -3.086905 |
| Al | 1.955782  | 1.297352  | -1.790033 |
| Al | -0.753242 | 0.747579  | -1.709339 |
| Al | -1.242903 | -2.075354 | -1.481872 |
| Al | 0.059684  | 3.307535  | -1.014597 |
| Al | -3.231164 | -0.119895 | -0.813303 |
| Al | 1.278239  | -1.172277 | -0.515645 |
| Al | 2.535324  | 3.103445  | 0.338079  |
| Al | 0.693811  | 1.264029  | 0.572864  |
| Al | -1.969595 | 2.072963  | 0.577808  |
| Al | 3.211673  | 0.383391  | 0.668536  |
| Al | -1.083651 | -0.556676 | 0.702852  |
| Al | -2.885751 | -2.456061 | 0.773720  |
| Al | -0.111565 | -3.037949 | 0.971884  |
| Al | 0.115968  | 3.546087  | 1.768990  |
| Al | -3.296563 | 0.059599  | 1.999350  |
| Al | 1.166577  | -0.841386 | 2.331622  |
| Al | 2.014952  | 1.785451  | 2.794684  |
| Al | -0.780787 | 1.095223  | 2.935431  |
| Al | -1.405992 | -1.693852 | 3.065099  |
| Mg | -2.428399 | -0.585683 | -3.978419 |
| Mg | -2.979755 | 2.854708  | -2.279184 |
| Mg | 3.934462  | -1.124237 | -2.158950 |
| Mg | 1.223997  | -3.992456 | -1.871357 |
| Mg | 3.220359  | -2.908717 | 1.198687  |

25  
Al21Mg4

|    |           |           |           |
|----|-----------|-----------|-----------|
| Al | -3.111240 | 1.384621  | -0.569546 |
| Al | -2.040891 | 0.723606  | 2.026765  |
| Al | -1.921549 | 3.398045  | 1.016496  |
| Al | -1.729726 | -0.990900 | -0.128269 |
| Al | -1.409064 | 3.264173  | -1.787000 |
| Al | -1.257750 | -2.129821 | 2.268378  |
| Al | -1.235157 | 0.556889  | -2.570504 |
| Al | -0.633631 | -2.249533 | -2.360546 |

|    |           |           |           |
|----|-----------|-----------|-----------|
| Al | -0.510929 | 1.492628  | -0.070895 |
| Al | 0.333622  | 2.348256  | 2.342145  |
| Al | 0.490347  | -2.845770 | 0.220932  |
| Al | 0.535904  | -0.275122 | 1.640372  |
| Al | 0.689333  | 3.829756  | -0.023946 |
| Al | 0.830718  | -0.478660 | -1.023880 |
| Al | 1.144741  | -0.459922 | -3.641131 |
| Al | 1.153443  | 2.029253  | -2.219406 |
| Al | 1.464229  | -2.450072 | 2.712779  |
| Al | 2.184195  | -2.502089 | -2.000557 |
| Al | 2.263809  | 1.524380  | 0.331885  |
| Al | 2.863490  | -1.344165 | 0.529594  |
| Al | 3.250547  | 0.109715  | -1.879813 |
| Mg | -3.792153 | -1.248038 | -2.458143 |
| Mg | -2.370614 | -4.048775 | -0.197660 |
| Mg | -0.276619 | -0.105113 | 4.608286  |
| Mg | 3.084945  | 0.466658  | 3.233666  |

25  
Al<sub>22</sub>Mg<sub>3</sub>

|    |           |           |           |
|----|-----------|-----------|-----------|
| Al | 0.597508  | 0.870678  | -3.730511 |
| Al | 0.421265  | -1.935138 | -3.321167 |
| Al | -1.907315 | -0.350540 | -3.233071 |
| Al | 2.525619  | -0.448109 | -2.101476 |
| Al | -1.304361 | 2.152887  | -2.014402 |
| Al | -0.016770 | -0.191398 | -1.426005 |
| Al | 1.419584  | 2.127008  | -1.330338 |
| Al | -1.599462 | -2.469578 | -1.315005 |
| Al | 1.158242  | -2.576926 | -0.682132 |
| Al | -2.706678 | 0.021829  | -0.563257 |
| Al | -0.163068 | 3.960965  | 0.024035  |
| Al | -0.600061 | 1.464078  | 0.535066  |
| Al | 1.901910  | -0.022794 | 0.577434  |
| Al | -0.600067 | -1.146449 | 0.907544  |
| Al | -0.707526 | -3.753779 | 1.097345  |
| Al | -3.003802 | -2.135023 | 1.200738  |
| Al | 1.692914  | 2.541672  | 1.475972  |
| Al | 1.441415  | -2.268229 | 2.155889  |
| Al | -2.320090 | 0.393179  | 2.358061  |
| Al | -0.762111 | 2.865833  | 2.694188  |
| Al | 0.458146  | 0.370814  | 2.937587  |
| Al | -1.121856 | -1.996806 | 3.315450  |
| Mg | 4.351235  | 1.682919  | -0.328902 |
| Mg | 4.130563  | -2.178178 | 0.223005  |
| Mg | -3.285235 | 3.021088  | 0.543953  |

25  
Al<sub>23</sub>Mg<sub>2</sub>

|    |           |           |           |
|----|-----------|-----------|-----------|
| Al | -2.851401 | -0.542771 | 1.842769  |
| Al | -2.688287 | -2.917204 | 0.322684  |
| Al | -2.678243 | -0.414688 | -1.026525 |
| Al | -1.632908 | 2.164442  | -1.881975 |
| Al | -1.485322 | -0.142094 | -3.569606 |
| Al | -1.205986 | 1.421075  | 0.764866  |
| Al | -1.200719 | -2.657626 | 2.769511  |
| Al | -0.899600 | -2.448244 | -1.894030 |
| Al | -0.652207 | -1.316126 | 0.615087  |
| Al | -0.217798 | 0.020801  | 3.000614  |
| Al | -0.035758 | -3.852524 | 0.482028  |
| Al | -0.013211 | 0.135143  | -1.442552 |
| Al | 0.724873  | 1.653931  | -3.421642 |
| Al | 0.955724  | 2.551007  | 2.097552  |
| Al | 1.026645  | 2.595922  | -0.778514 |
| Al | 1.154876  | -1.140571 | -3.405916 |
| Al | 1.366696  | 0.324444  | 0.750249  |
| Al | 1.540421  | -2.068992 | 2.104023  |
| Al | 1.712400  | -2.042674 | -0.783476 |
| Al | 2.613331  | 0.441804  | 3.024915  |
| Al | 2.723516  | 0.495906  | -1.651464 |
| Al | 3.363162  | 2.000199  | 0.727834  |
| Al | 3.729355  | -0.792967 | 0.734193  |
| Mg | -4.213130 | 2.015760  | 0.206862  |
| Mg | -1.136429 | 4.516048  | 0.412515  |

25  
Al<sub>24</sub>Mg<sub>1</sub>

|    |          |          |           |
|----|----------|----------|-----------|
| Al | 0.239630 | 0.900719 | -4.079382 |
|----|----------|----------|-----------|



|    |           |           |           |
|----|-----------|-----------|-----------|
| Al | -0.100999 | -1.724113 | -3.496390 |
| Al | 2.320735  | -0.508820 | -3.007513 |
| Al | -2.177787 | 0.020665  | -2.659292 |
| Al | -0.887739 | 2.556085  | -2.320796 |
| Al | 1.838308  | 2.092926  | -1.958235 |
| Al | 0.160819  | 0.113062  | -1.478893 |
| Al | -1.646273 | -2.516482 | -1.432028 |
| Al | 1.220445  | -2.322654 | -1.087882 |
| Al | 2.846744  | -0.123418 | -0.379793 |
| Al | -3.456143 | -0.746931 | -0.322429 |
| Al | -1.903302 | 1.420304  | -0.101619 |
| Al | 0.209435  | 3.348114  | 0.065457  |
| Al | 2.873809  | 2.592339  | 0.465708  |
| Al | -0.861219 | -1.064926 | 0.649033  |
| Al | -0.269140 | -3.718413 | 0.725753  |
| Al | 0.827806  | 0.946099  | 0.958486  |
| Al | -2.818991 | -2.839547 | 1.222072  |
| Al | 1.527521  | -1.730424 | 1.626192  |
| Al | -1.261437 | 2.268499  | 2.325820  |
| Al | -2.593918 | -0.158089 | 2.363398  |
| Al | 1.289922  | 2.909303  | 2.669122  |
| Al | -0.856547 | -2.349505 | 3.040345  |
| Al | 0.090081  | 0.140731  | 3.342124  |
| Mg | 3.388240  | 0.494477  | 2.870742  |

25

Al25Mg0

|    |           |           |           |
|----|-----------|-----------|-----------|
| Al | 1.393791  | -0.742507 | -3.609707 |
| Al | -0.788006 | 0.779325  | -3.125285 |
| Al | -0.959448 | -2.071023 | -2.617392 |
| Al | 1.781263  | -3.049948 | -2.213633 |
| Al | -0.335567 | 3.300201  | -1.876521 |
| Al | -2.965980 | -0.317284 | -1.853150 |
| Al | -2.908859 | 2.359024  | -1.830004 |
| Al | 1.681749  | 1.459445  | -1.815641 |
| Al | 3.330217  | -0.863285 | -1.639982 |
| Al | 0.704394  | -0.897784 | -1.002421 |
| Al | -0.962580 | 1.070271  | -0.484737 |
| Al | -0.018334 | -3.500068 | -0.283486 |
| Al | -1.791390 | -1.566523 | 0.187382  |
| Al | -1.851120 | 3.451290  | 0.430908  |
| Al | 2.303428  | -2.311469 | 0.588851  |
| Al | 0.885618  | 2.661376  | 0.622366  |
| Al | 2.750970  | 0.530093  | 0.637037  |
| Al | -3.257784 | 0.957314  | 0.728627  |
| Al | 0.298907  | -0.136927 | 1.482922  |
| Al | -0.001116 | -2.575239 | 2.330021  |
| Al | -1.143026 | 1.857831  | 2.497444  |
| Al | -2.167871 | -0.688219 | 2.675533  |
| Al | 2.352877  | -1.051135 | 2.980511  |
| Al | 1.645931  | 1.621273  | 3.031132  |
| Al | 0.021937  | -0.276033 | 4.159225  |

30

Al0Mg30

|    |           |           |           |
|----|-----------|-----------|-----------|
| Mg | -5.015153 | 0.748946  | 0.436147  |
| Mg | -4.861982 | -2.326553 | -1.397915 |
| Mg | -3.348509 | 3.604002  | -0.863097 |
| Mg | -3.253809 | -2.019070 | 1.741769  |
| Mg | -3.211119 | 0.567110  | -2.665267 |
| Mg | -3.178443 | 2.980705  | 2.629748  |
| Mg | -3.034473 | -2.450805 | -4.484053 |
| Mg | -2.891744 | -5.177508 | -2.296463 |
| Mg | -1.534493 | 0.824207  | 0.446271  |
| Mg | -1.395025 | 0.239470  | 3.961594  |
| Mg | -1.385053 | -2.153208 | -1.327088 |
| Mg | -1.294764 | -4.932870 | 0.790760  |
| Mg | -0.288200 | 2.575753  | -2.379364 |
| Mg | -0.287583 | 4.119581  | 0.826334  |
| Mg | -0.118829 | -0.487545 | -4.181488 |
| Mg | -0.066180 | 3.500922  | 4.329603  |
| Mg | 0.125165  | -4.027422 | -3.843193 |
| Mg | 0.221961  | -1.983986 | 1.832749  |
| Mg | 1.464463  | -0.198613 | -1.024188 |
| Mg | 1.477680  | 1.325376  | 2.091804  |
| Mg | 1.786512  | -3.738124 | -0.729576 |

|    |          |           |           |
|----|----------|-----------|-----------|
| Mg | 1.956568 | -0.982285 | 4.673547  |
| Mg | 2.775676 | 1.515335  | -3.865938 |
| Mg | 2.790917 | 4.627744  | 2.473022  |
| Mg | 2.804758 | 3.064916  | -0.689914 |
| Mg | 3.069623 | -2.008401 | -3.527961 |
| Mg | 3.219584 | 2.248508  | 5.002117  |
| Mg | 3.645198 | -1.479545 | 1.490218  |
| Mg | 4.906316 | 0.223347  | -1.334435 |
| Mg | 4.920938 | 1.800013  | 1.884257  |

30

Al1Mg29

|    |           |           |           |
|----|-----------|-----------|-----------|
| Al | 1.019146  | 1.583591  | 0.133604  |
| Mg | -5.420758 | -2.234948 | -2.461975 |
| Mg | -4.416691 | -2.011935 | 1.005016  |
| Mg | -4.203063 | 0.822304  | -1.349657 |
| Mg | -4.115608 | 1.594883  | 2.301518  |
| Mg | -2.990939 | -0.567286 | -4.553830 |
| Mg | -2.656195 | 3.154099  | -3.726051 |
| Mg | -2.060340 | -2.606128 | -1.681183 |
| Mg | -1.821124 | 3.171775  | -0.146887 |
| Mg | -1.819818 | -0.857473 | 4.172770  |
| Mg | -1.619959 | -0.099369 | 0.802998  |
| Mg | -0.816559 | 0.711323  | -2.283692 |
| Mg | -0.771479 | -3.391025 | 1.676771  |
| Mg | -0.542811 | 2.348709  | 2.909519  |
| Mg | 0.237175  | 1.528482  | -5.379727 |
| Mg | 0.587840  | -1.945817 | -4.080648 |
| Mg | 0.770009  | 3.693813  | -2.318863 |
| Mg | 0.888937  | -4.789111 | -1.367908 |
| Mg | 1.004968  | 4.689399  | 0.963876  |
| Mg | 1.055253  | -1.488552 | -0.678008 |
| Mg | 1.198383  | -2.986345 | 4.782305  |
| Mg | 1.205997  | -0.523820 | 2.465376  |
| Mg | 1.270495  | 0.685608  | 5.616708  |
| Mg | 2.571997  | 0.802343  | -2.647934 |
| Mg | 2.881480  | 2.390598  | 2.671522  |
| Mg | 2.938314  | -3.405088 | 1.501884  |
| Mg | 3.678008  | 3.251648  | -0.555119 |
| Mg | 3.853210  | -2.635325 | -2.158666 |
| Mg | 3.881855  | 0.000789  | 0.427217  |
| Mg | 4.212277  | -0.887142 | 3.959067  |

30

Al2Mg28

|    |           |           |           |
|----|-----------|-----------|-----------|
| Al | -2.450891 | -1.038408 | 0.511789  |
| Al | 1.937488  | 1.836804  | 1.386698  |
| Mg | -5.473572 | -0.769600 | -0.474385 |
| Mg | -4.488616 | 0.140934  | 2.681806  |
| Mg | -4.472843 | -3.173671 | 1.734877  |
| Mg | -3.517220 | 2.018453  | 0.042730  |
| Mg | -3.418500 | -3.321937 | -1.541719 |
| Mg | -2.887604 | -0.091328 | -2.582810 |
| Mg | -1.917843 | -1.840494 | 3.603758  |
| Mg | -1.505853 | 3.412582  | -2.774507 |
| Mg | -1.365056 | -2.650810 | -4.688992 |
| Mg | -1.229816 | -3.999346 | 1.026954  |
| Mg | -1.229638 | 1.385984  | 2.566260  |
| Mg | -0.373168 | 1.085835  | -0.613659 |
| Mg | -0.335443 | -5.318139 | -2.305663 |
| Mg | -0.284798 | -2.037749 | -1.549944 |
| Mg | -0.276666 | 4.152663  | 0.658600  |
| Mg | 0.438223  | 0.519680  | -3.916918 |
| Mg | 0.683735  | -1.205549 | 1.581954  |
| Mg | 1.005105  | 3.785260  | 3.756671  |
| Mg | 1.595779  | 0.512546  | 4.328255  |
| Mg | 2.108005  | 3.101508  | -1.613143 |
| Mg | 2.326744  | -2.515387 | -3.729349 |
| Mg | 2.362127  | -3.752919 | -0.196880 |
| Mg | 2.706396  | -0.249694 | -0.968579 |
| Mg | 3.039826  | 4.826353  | 1.190212  |
| Mg | 3.943729  | 1.019020  | -3.885619 |
| Mg | 3.994188  | -0.541794 | 2.136906  |
| Mg | 4.211830  | 2.586931  | 3.491341  |
| Mg | 4.874352  | 2.122271  | 0.143355  |

30

## Al3Mg27

|    |           |           |           |
|----|-----------|-----------|-----------|
| Al | -1.652765 | 1.153180  | 3.398359  |
| Al | -0.273649 | -0.302814 | -1.555118 |
| Al | 1.922362  | -0.875556 | -3.045687 |
| Mg | -4.857162 | 1.237980  | 3.145039  |
| Mg | -3.263663 | 0.128275  | 5.965856  |
| Mg | -3.224526 | -0.542151 | -2.879870 |
| Mg | -3.176264 | -1.707499 | 3.075979  |
| Mg | -3.112581 | 3.435339  | 5.100506  |
| Mg | -2.924761 | 0.432036  | 0.410914  |
| Mg | -2.912767 | 3.600637  | 1.675601  |
| Mg | -2.198023 | -2.776910 | -0.548617 |
| Mg | -1.899286 | 2.483893  | -2.108226 |
| Mg | -0.689171 | -2.698025 | -3.608005 |
| Mg | -0.515824 | 0.577304  | -4.600921 |
| Mg | -0.342235 | -1.353420 | 4.970007  |
| Mg | -0.301590 | 1.822772  | 6.221878  |
| Mg | -0.215214 | -1.104384 | 1.594750  |
| Mg | -0.102392 | 3.967003  | 3.576232  |
| Mg | -0.025728 | 2.129865  | 0.699149  |
| Mg | 1.186695  | -3.037259 | -0.775373 |
| Mg | 1.391495  | -1.789485 | -6.119595 |
| Mg | 1.464366  | 2.255823  | -2.385316 |
| Mg | 1.612325  | 1.017230  | 3.483966  |
| Mg | 2.444044  | -4.009594 | -3.751587 |
| Mg | 2.522569  | 0.069358  | -0.034724 |
| Mg | 2.717267  | 1.255499  | -5.372997 |
| Mg | 2.881702  | -2.404833 | 2.357751  |
| Mg | 4.405777  | -2.321915 | -1.503232 |
| Mg | 4.544991  | -1.574830 | -4.837586 |
| Mg | 4.594011  | 0.932481  | -2.549133 |

30

## Al4Mg26

|    |           |           |           |
|----|-----------|-----------|-----------|
| Al | -1.854360 | 0.218452  | -1.596551 |
| Al | 0.034786  | -1.000626 | 0.018477  |
| Al | 0.281413  | -0.262273 | 2.789890  |
| Al | 0.790868  | 0.774434  | -1.964158 |
| Mg | -4.975849 | -0.518570 | -1.039422 |
| Mg | -4.030064 | 1.757313  | -3.439421 |
| Mg | -3.716170 | 2.487548  | -0.124058 |
| Mg | -3.383252 | -1.551678 | -3.860520 |
| Mg | -2.704630 | -0.368902 | 1.501819  |
| Mg | -2.511337 | -2.834437 | -0.787314 |
| Mg | -2.080812 | -1.237166 | 4.761666  |
| Mg | -1.833126 | 2.007516  | 3.783655  |
| Mg | -1.198672 | 3.285035  | -2.350082 |
| Mg | -0.986734 | 0.786815  | -4.647079 |
| Mg | -0.956741 | -3.166112 | 2.219201  |
| Mg | -0.530363 | 2.042847  | 0.687524  |
| Mg | -0.173024 | -2.079674 | -3.069027 |
| Mg | 0.549563  | 0.667829  | 5.855340  |
| Mg | 0.609839  | -4.196539 | -0.594652 |
| Mg | 1.080462  | -2.560921 | 4.897666  |
| Mg | 1.487705  | 2.726961  | 3.303792  |
| Mg | 1.629794  | 2.941131  | -4.215340 |
| Mg | 1.899017  | 3.682419  | -0.906837 |
| Mg | 2.252869  | -0.368545 | -4.635217 |
| Mg | 2.327613  | -2.483869 | 1.743372  |
| Mg | 2.536496  | 0.781172  | 0.749410  |
| Mg | 2.774766  | -1.728498 | -1.532579 |
| Mg | 3.299662  | -0.106219 | 3.944511  |
| Mg | 3.988495  | 1.353114  | -2.256771 |
| Mg | 5.391787  | -1.048559 | 0.762707  |

30

## Al5Mg25

|    |           |           |           |
|----|-----------|-----------|-----------|
| Al | -1.543448 | -1.503302 | 0.564483  |
| Al | -0.051586 | 0.766278  | 1.130317  |
| Al | 0.103499  | -0.315158 | -1.325671 |
| Al | 0.282616  | 2.455400  | -1.063331 |
| Al | 1.174333  | -1.703600 | 0.824294  |
| Mg | -4.767652 | -1.188770 | 0.222405  |
| Mg | -3.394414 | -2.776132 | 2.889724  |
| Mg | -3.196039 | -4.159479 | -0.251959 |
| Mg | -2.958579 | 0.638201  | 2.547509  |

|    |           |           |           |
|----|-----------|-----------|-----------|
| Mg | -2.661488 | 1.222656  | -0.706422 |
| Mg | -2.640680 | -1.578607 | -2.486981 |
| Mg | -2.255812 | 4.251892  | -2.014673 |
| Mg | -1.568536 | 3.603396  | 1.338274  |
| Mg | -1.249720 | 1.380217  | -3.710648 |
| Mg | -0.489557 | -4.253408 | 1.841961  |
| Mg | -0.439791 | -1.320172 | 3.582663  |
| Mg | -0.238836 | 2.045522  | 4.075210  |
| Mg | -0.120434 | -3.547116 | -1.474849 |
| Mg | 0.287360  | -1.623746 | -4.257863 |
| Mg | 0.465794  | 5.625439  | -0.535462 |
| Mg | 0.667396  | 4.219649  | -3.728053 |
| Mg | 1.794793  | 3.355516  | 1.659808  |
| Mg | 2.113616  | 1.132332  | -3.389122 |
| Mg | 2.349037  | -3.199411 | 3.438776  |
| Mg | 2.486236  | 0.236925  | 3.068022  |
| Mg | 2.547427  | -4.582762 | 0.297092  |
| Mg | 2.804147  | -1.979888 | -1.966477 |
| Mg | 2.895792  | 0.813083  | -0.175159 |
| Mg | 3.188429  | 3.850645  | -1.494206 |
| Mg | 4.416095  | -1.865600 | 1.100337  |

30  
Al6Mg24

|    |           |           |           |
|----|-----------|-----------|-----------|
| Al | -1.676301 | -1.744807 | 1.007143  |
| Al | -0.792508 | 0.762965  | 1.018518  |
| Al | -0.532685 | 1.747597  | -1.534438 |
| Al | -0.284797 | -0.957850 | -1.117609 |
| Al | 0.924970  | -1.431882 | 1.373328  |
| Al | 1.671205  | 0.722739  | -0.185028 |
| Mg | -4.063210 | -3.436881 | 1.803139  |
| Mg | -3.774515 | 0.224502  | 2.343115  |
| Mg | -3.337058 | 0.160678  | -0.922650 |
| Mg | -3.189611 | 2.801996  | -3.015338 |
| Mg | -2.820956 | -3.007538 | -1.668793 |
| Mg | -2.742852 | 3.182859  | 0.381580  |
| Mg | -1.740068 | -0.215759 | -3.837353 |
| Mg | -1.470782 | 2.623217  | 3.490067  |
| Mg | -1.008716 | -0.724537 | 3.930453  |
| Mg | -0.751062 | 4.916807  | -1.893244 |
| Mg | -0.567864 | -3.902947 | 3.009163  |
| Mg | -0.124977 | 2.794937  | -4.527284 |
| Mg | -0.009003 | -4.112793 | -0.275506 |
| Mg | 0.188427  | -3.000526 | -3.490915 |
| Mg | 0.610755  | 3.599449  | 0.893872  |
| Mg | 1.627653  | 0.152829  | -3.384610 |
| Mg | 1.641730  | 1.208540  | 3.041702  |
| Mg | 2.136410  | -1.937680 | 4.269858  |
| Mg | 2.270152  | 3.228892  | -2.061540 |
| Mg | 2.652144  | -2.216117 | -1.209491 |
| Mg | 2.749960  | -4.017094 | 1.688588  |
| Mg | 3.894077  | 2.702016  | 0.969399  |
| Mg | 4.006478  | -0.727846 | 1.538573  |
| Mg | 4.513003  | 0.604232  | -1.634699 |

30  
Al7Mg23

|    |           |           |           |
|----|-----------|-----------|-----------|
| Al | 0.492245  | -0.045948 | -2.123750 |
| Al | -1.317348 | 1.502570  | -0.701382 |
| Al | 1.633344  | -1.691029 | -0.333877 |
| Al | -0.985047 | -1.141599 | -0.057172 |
| Al | 1.087241  | 0.831842  | 0.434189  |
| Al | -1.193686 | 0.718433  | 1.934299  |
| Al | 0.619243  | -1.227939 | 2.117065  |
| Mg | -0.143740 | -1.173974 | -4.988627 |
| Mg | 2.282885  | 1.143994  | -4.417855 |
| Mg | -1.114596 | 2.069243  | -3.850409 |
| Mg | 2.781166  | -2.186123 | -3.200937 |
| Mg | -2.634520 | -0.762290 | -2.679386 |
| Mg | -0.255301 | -3.292363 | -2.297376 |
| Mg | -4.107213 | 2.232855  | -1.980115 |
| Mg | 1.375724  | 3.063504  | -1.730505 |
| Mg | -1.673874 | 4.557161  | -1.390244 |
| Mg | 3.693569  | 0.473335  | -1.371384 |
| Mg | -3.127321 | -3.400634 | -0.453112 |
| Mg | 3.540836  | -3.917472 | 0.455542  |

|    |           |           |          |
|----|-----------|-----------|----------|
| Mg | -3.931072 | -0.138228 | 0.503320 |
| Mg | 0.037602  | -4.104167 | 1.013721 |
| Mg | 3.418871  | 2.830562  | 1.081079 |
| Mg | -3.295158 | 3.037992  | 1.345750 |
| Mg | 0.031107  | 3.632880  | 1.446049 |
| Mg | 3.697531  | -0.652798 | 1.853650 |
| Mg | -2.364626 | -2.213766 | 2.659755 |
| Mg | 1.551455  | 1.435000  | 3.567187 |
| Mg | 2.164783  | -3.258624 | 3.766142 |
| Mg | -1.755677 | 2.446769  | 4.410721 |
| Mg | -0.508425 | -0.769186 | 4.987662 |

30

Al8Mg22

|    |           |           |           |
|----|-----------|-----------|-----------|
| Al | -0.837768 | 0.510055  | -1.443314 |
| Al | 1.830159  | 0.321839  | -0.754440 |
| Al | 0.138512  | -1.919454 | -0.564533 |
| Al | 0.336849  | 2.477888  | 0.001919  |
| Al | -2.278468 | -0.987189 | 0.295482  |
| Al | -2.190833 | 1.707753  | 0.639520  |
| Al | 2.036689  | -1.430269 | 1.262037  |
| Al | -0.063187 | 0.158314  | 1.305509  |
| Mg | -1.748429 | 0.945544  | -4.415961 |
| Mg | 0.967876  | -1.031126 | -3.547825 |
| Mg | 1.088514  | 2.432744  | -3.111474 |
| Mg | 4.036722  | 0.549560  | -2.923197 |
| Mg | -2.279228 | -2.029214 | -2.733431 |
| Mg | 0.356798  | -4.326025 | -2.510042 |
| Mg | -1.982639 | 3.460634  | -2.029900 |
| Mg | -4.027599 | 0.751256  | -1.800367 |
| Mg | 3.200138  | -2.539669 | -1.467243 |
| Mg | 3.316801  | 3.216193  | -0.719357 |
| Mg | -2.217002 | -4.115541 | -0.098144 |
| Mg | 4.809411  | -0.217208 | 0.418845  |
| Mg | 1.576350  | -4.500765 | 0.781821  |
| Mg | -1.396687 | 4.921461  | 0.899547  |
| Mg | -5.025944 | 0.112918  | 1.306859  |
| Mg | 2.638750  | 1.661056  | 2.136144  |
| Mg | -0.684723 | -2.742267 | 2.509222  |
| Mg | -3.945779 | 3.202550  | 2.650135  |
| Mg | 4.003927  | -2.755985 | 3.140248  |
| Mg | -0.390695 | 2.687177  | 3.176694  |
| Mg | -2.423240 | -0.005742 | 3.404816  |
| Mg | 1.154724  | -0.516488 | 4.190432  |

30

Al9Mg21

|    |           |           |           |
|----|-----------|-----------|-----------|
| Al | -0.992079 | -0.633954 | -2.494744 |
| Al | -1.092786 | 1.943114  | -1.624804 |
| Al | 0.897491  | 0.320250  | -0.844788 |
| Al | -0.050027 | -2.232636 | -0.450893 |
| Al | -1.769344 | -0.090629 | 0.063584  |
| Al | 2.477559  | -1.473577 | 0.385451  |
| Al | -0.217046 | 2.039719  | 0.991355  |
| Al | 2.376553  | 1.108848  | 1.257190  |
| Al | 0.306157  | -0.578973 | 1.750501  |
| Mg | -1.973780 | 1.497701  | -4.665506 |
| Mg | 1.235781  | 1.339128  | -3.823878 |
| Mg | -0.640161 | -3.653037 | -3.298989 |
| Mg | 2.091856  | -1.777546 | -2.874340 |
| Mg | -3.963932 | 0.577516  | -2.169607 |
| Mg | 3.984791  | 0.670427  | -1.524805 |
| Mg | -3.163256 | -2.631370 | -1.285290 |
| Mg | 1.893621  | 3.295734  | -1.161725 |
| Mg | 2.350510  | -4.381029 | -0.790479 |
| Mg | -0.972330 | 4.848494  | -0.428988 |
| Mg | -1.020836 | -5.154119 | -0.114768 |
| Mg | -3.369374 | 2.642780  | 0.495149  |
| Mg | -4.716311 | -0.530700 | 1.025957  |
| Mg | 5.242555  | -0.274544 | 1.421212  |
| Mg | -2.118610 | -2.595072 | 2.036861  |
| Mg | 2.018259  | 4.117114  | 2.078248  |
| Mg | 1.087340  | -3.639080 | 2.272993  |
| Mg | -1.382020 | 4.084760  | 3.004138  |
| Mg | -2.246501 | 0.676351  | 3.141248  |
| Mg | 2.842864  | -1.101717 | 3.592853  |

|          |           |           |           |
|----------|-----------|-----------|-----------|
| Mg       | 0.883058  | 1.586047  | 4.036864  |
| 30       |           |           |           |
| Al10Mg20 |           |           |           |
| Al       | -2.214032 | 0.202254  | -0.584651 |
| Al       | -1.330466 | 1.865036  | 1.440797  |
| Al       | -1.012871 | 2.549728  | -1.243746 |
| Al       | -1.005061 | -0.884629 | 1.627072  |
| Al       | -0.438496 | -1.872896 | -0.860279 |
| Al       | -0.394776 | 0.232820  | -2.667253 |
| Al       | 0.515879  | 0.660077  | -0.144768 |
| Al       | 0.996826  | 0.737710  | 2.471041  |
| Al       | 1.622185  | -1.554919 | 0.987275  |
| Al       | 1.952206  | -0.928807 | -1.723400 |
| Mg       | -4.033398 | 2.753533  | -0.137485 |
| Mg       | -3.997364 | 0.177481  | 2.068353  |
| Mg       | -3.330539 | -2.658161 | 0.297478  |
| Mg       | -3.327408 | 1.521731  | -3.237556 |
| Mg       | -2.849002 | -1.825555 | -2.973056 |
| Mg       | -1.639352 | 4.945526  | 0.755665  |
| Mg       | -1.573686 | 0.542749  | 4.401747  |
| Mg       | -0.474474 | 2.913073  | -4.359549 |
| Mg       | -0.453953 | -4.016347 | 1.492389  |
| Mg       | 0.027668  | 3.447778  | 3.830176  |
| Mg       | 0.300155  | -2.725688 | -3.824540 |
| Mg       | 0.629040  | -2.029787 | 4.069767  |
| Mg       | 1.406690  | 3.538195  | 0.773083  |
| Mg       | 1.803897  | -4.079255 | -1.088358 |
| Mg       | 1.983464  | 0.036306  | -4.756299 |
| Mg       | 2.106374  | 2.317576  | -2.299412 |
| Mg       | 2.979245  | -4.009773 | 2.271760  |
| Mg       | 3.592828  | 0.984068  | 0.427260  |
| Mg       | 3.661231  | -0.690745 | 3.328349  |
| Mg       | 4.497188  | -2.149075 | -0.341862 |
| 30       |           |           |           |
| Al11Mg19 |           |           |           |
| Al       | -2.180925 | -1.393521 | -0.141236 |
| Al       | -1.708238 | 1.321843  | -0.479223 |
| Al       | -1.272098 | 0.162231  | 1.995152  |
| Al       | -0.940434 | -0.399944 | -2.495999 |
| Al       | -0.249995 | -2.352559 | 1.654572  |
| Al       | 0.348710  | -0.506379 | -0.132543 |
| Al       | 0.501788  | 2.034649  | 1.004943  |
| Al       | 0.733420  | 1.720241  | -1.733418 |
| Al       | 1.474219  | -0.228755 | 2.292356  |
| Al       | 1.798228  | -0.697876 | -2.331131 |
| Al       | 2.705204  | 0.756951  | -0.019044 |
| Mg       | -4.338346 | 0.582510  | 1.170231  |
| Mg       | -4.094294 | 0.198497  | -2.218736 |
| Mg       | -3.219539 | -2.164397 | 2.855217  |
| Mg       | -2.870662 | -2.895668 | -2.844567 |
| Mg       | -2.337548 | -4.475046 | 0.542874  |
| Mg       | -2.287772 | 3.189473  | 2.059647  |
| Mg       | -1.867070 | 2.509209  | -3.437144 |
| Mg       | -0.751677 | 4.373190  | -0.772012 |
| Mg       | -0.411130 | -1.327797 | 4.673441  |
| Mg       | 0.148587  | 2.005216  | 4.180649  |
| Mg       | 0.152678  | -3.367292 | -1.440662 |
| Mg       | 0.348376  | -2.283814 | -4.662026 |
| Mg       | 0.926532  | 1.083584  | -4.803287 |
| Mg       | 2.255754  | -3.070156 | 3.427774  |
| Mg       | 2.656853  | 3.911814  | -0.494157 |
| Mg       | 2.879363  | -2.424314 | 0.147102  |
| Mg       | 3.142284  | 2.555732  | 2.627864  |
| Mg       | 3.824454  | 1.623799  | -2.837562 |
| Mg       | 4.633274  | -0.441422 | 2.210926  |
| 30       |           |           |           |
| Al12Mg18 |           |           |           |
| Al       | -0.386214 | -0.523588 | -2.311701 |
| Al       | 2.079045  | 0.669390  | -1.678773 |
| Al       | -0.319663 | 2.054819  | -1.201182 |
| Al       | 1.610802  | -2.043431 | -1.099620 |
| Al       | -2.232311 | 0.206828  | -0.346402 |
| Al       | -1.065601 | -2.340402 | -0.277442 |
| Al       | 0.410626  | -0.115700 | 0.244056  |

|    |           |           |           |
|----|-----------|-----------|-----------|
| Al | 1.718530  | 2.130459  | 0.698055  |
| Al | -0.957335 | 1.853608  | 1.528941  |
| Al | 0.878505  | -2.293947 | 1.669049  |
| Al | -1.451226 | -0.869127 | 2.104883  |
| Al | 0.946051  | 0.323549  | 2.796429  |
| Mg | 0.582439  | 1.817478  | -4.254793 |
| Mg | 1.997008  | -1.330662 | -4.212365 |
| Mg | -2.706124 | 1.465348  | -3.239995 |
| Mg | -0.311596 | -3.647325 | -3.065477 |
| Mg | -3.257872 | -1.880827 | -2.546987 |
| Mg | 2.131613  | 3.885089  | -1.966003 |
| Mg | 4.551426  | -1.287115 | -1.943745 |
| Mg | 4.638752  | 2.096634  | -0.486413 |
| Mg | -3.124613 | 3.281871  | -0.323361 |
| Mg | 0.883133  | -4.925155 | -0.028218 |
| Mg | -0.095030 | 4.742166  | 0.547855  |
| Mg | -4.067330 | -2.135981 | 0.807522  |
| Mg | 3.489959  | -0.609888 | 1.206980  |
| Mg | -3.984924 | 1.056067  | 2.182382  |
| Mg | -1.634814 | -4.063616 | 2.353358  |
| Mg | 1.097056  | 3.361186  | 3.540719  |
| Mg | -1.500227 | 1.150106  | 4.598971  |
| Mg | 0.079935  | -2.027834 | 4.703278  |

30

Al13Mg17

|    |           |           |           |
|----|-----------|-----------|-----------|
| Al | -2.244818 | 0.444270  | -1.328409 |
| Al | -2.126709 | 0.456850  | 1.490789  |
| Al | -1.777643 | -1.957127 | 0.069521  |
| Al | -0.872867 | 2.525017  | -0.007783 |
| Al | -0.331867 | -1.397453 | -2.287342 |
| Al | -0.121844 | -1.378065 | 2.254168  |
| Al | 0.042733  | -0.008032 | -0.030265 |
| Al | 0.210338  | 1.350642  | -2.330031 |
| Al | 0.439021  | 1.382926  | 2.212681  |
| Al | 0.976322  | -2.543783 | -0.065734 |
| Al | 1.880920  | 1.934893  | -0.125824 |
| Al | 2.205424  | -0.477684 | -1.544859 |
| Al | 2.349443  | -0.459741 | 1.250486  |
| Mg | -4.727778 | -0.888167 | 0.056829  |
| Mg | -4.065483 | 2.585831  | 0.150154  |
| Mg | -3.133848 | -2.165076 | 2.949125  |
| Mg | -2.254659 | 3.289767  | -2.773953 |
| Mg | -1.995732 | 3.309759  | 2.880922  |
| Mg | -1.950462 | 0.182499  | -4.453335 |
| Mg | -1.260509 | 0.324400  | 4.631388  |
| Mg | -1.084953 | -4.402208 | -1.771730 |
| Mg | -0.756033 | -4.464589 | 1.756391  |
| Mg | 1.015990  | 4.357854  | -1.925143 |
| Mg | 1.073175  | 4.453652  | 1.616803  |
| Mg | 1.604536  | -0.256050 | -4.629073 |
| Mg | 2.083058  | -3.340402 | -2.945358 |
| Mg | 2.381243  | -3.190133 | 2.801516  |
| Mg | 3.471754  | 2.078834  | 2.700948  |
| Mg | 4.158585  | -2.614574 | -0.206825 |
| Mg | 4.812664  | 0.865891  | -0.396058 |

30

Al14Mg16

|    |           |           |           |
|----|-----------|-----------|-----------|
| Al | -0.075714 | -0.238744 | -3.196129 |
| Al | 1.889319  | 1.399798  | -1.985426 |
| Al | -0.118157 | -2.720159 | -1.839185 |
| Al | -0.824001 | 1.748595  | -1.398748 |
| Al | -2.070215 | -0.801945 | -1.325912 |
| Al | 0.556451  | -0.469519 | -0.637665 |
| Al | 3.072617  | -0.092747 | 0.146052  |
| Al | 1.820100  | -2.630101 | 0.218853  |
| Al | 1.188646  | 1.846899  | 0.633398  |
| Al | -0.888852 | -2.292079 | 0.802092  |
| Al | -1.159262 | 3.102452  | 0.956558  |
| Al | -1.361886 | 0.425069  | 1.053744  |
| Al | 1.077826  | -0.650251 | 2.026977  |
| Al | -0.011309 | 1.654530  | 3.024332  |
| Mg | 0.202017  | 2.721502  | -4.282828 |
| Mg | -2.211648 | -2.337901 | -4.163080 |
| Mg | -2.909720 | 1.119024  | -3.712234 |

|    |           |           |           |
|----|-----------|-----------|-----------|
| Mg | 2.809724  | -1.623896 | -2.696921 |
| Mg | 0.871269  | 4.414329  | -1.203766 |
| Mg | -2.972500 | -3.844977 | -1.042363 |
| Mg | -3.818913 | 1.834702  | -0.386228 |
| Mg | 4.045409  | 2.903467  | -0.212743 |
| Mg | 0.105516  | -5.260902 | 0.011188  |
| Mg | -3.929805 | -1.357840 | 1.230927  |
| Mg | 1.307473  | 4.470034  | 2.404193  |
| Mg | 3.953230  | -2.010098 | 2.474184  |
| Mg | 3.224078  | 1.446668  | 3.034307  |
| Mg | 0.862958  | -3.639668 | 3.083461  |
| Mg | -3.156199 | 2.001066  | 3.153413  |
| Mg | -1.478451 | -1.117308 | 3.829550  |

30

Al15Mg15

|    |           |           |           |
|----|-----------|-----------|-----------|
| Al | 0.077222  | -0.377134 | -2.659882 |
| Al | 0.523267  | -3.054099 | -2.498738 |
| Al | -0.374696 | 2.305969  | -1.916666 |
| Al | -1.959156 | -2.005850 | -1.688860 |
| Al | 2.521967  | -1.257771 | -1.664775 |
| Al | -1.467795 | 0.332731  | -0.474937 |
| Al | 1.284959  | 0.792261  | -0.460164 |
| Al | 0.309091  | -1.845339 | -0.196110 |
| Al | -0.421833 | 2.498129  | 0.896930  |
| Al | -2.050012 | -1.794918 | 1.163337  |
| Al | 2.509567  | -1.033766 | 1.187843  |
| Al | 0.018709  | -0.172467 | 1.873292  |
| Al | -2.468282 | 0.927278  | 1.939499  |
| Al | 2.012892  | 1.675270  | 1.963553  |
| Al | -0.322215 | 1.817034  | 3.526986  |
| Mg | -1.445889 | -2.198431 | -4.803653 |
| Mg | 2.131847  | -1.601255 | -4.784361 |
| Mg | -2.835003 | 0.713083  | -3.302703 |
| Mg | 2.483901  | 1.601002  | -3.274213 |
| Mg | -3.225534 | 2.963089  | -0.519326 |
| Mg | 2.093477  | 3.850923  | -0.490887 |
| Mg | -4.507326 | -0.462017 | -0.258980 |
| Mg | 4.415413  | 1.027467  | -0.211163 |
| Mg | -1.147657 | -4.650898 | -0.189871 |
| Mg | 2.598069  | -4.025571 | -0.169746 |
| Mg | 0.519243  | -3.196098 | 2.656599  |
| Mg | -2.515670 | 3.964444  | 2.820200  |
| Mg | 1.062103  | 4.561690  | 2.839212  |
| Mg | -1.783194 | -0.989988 | 4.338718  |
| Mg | 1.962535  | -0.364769 | 4.358866  |

30

Al16Mg14

|    |           |           |           |
|----|-----------|-----------|-----------|
| Al | -3.281178 | 1.178299  | -0.520954 |
| Al | -2.628337 | -0.371008 | 1.808652  |
| Al | -2.170692 | -0.078643 | -2.776304 |
| Al | -1.216762 | 1.988441  | 1.176855  |
| Al | -1.108459 | -0.291448 | -0.383363 |
| Al | -1.082809 | -2.629014 | 0.931977  |
| Al | -0.917449 | 2.137928  | -1.643234 |
| Al | -0.791917 | -2.449553 | -1.920857 |
| Al | 0.082747  | -0.349827 | 2.046048  |
| Al | 0.612048  | -0.081573 | -2.537365 |
| Al | 1.141050  | 1.218233  | -0.117118 |
| Al | 1.230710  | -1.649110 | -0.285262 |
| Al | 1.321521  | 1.973936  | 2.436065  |
| Al | 1.424555  | -2.651137 | 2.178999  |
| Al | 2.769299  | -0.265752 | 1.511726  |
| Al | 3.151191  | -0.096992 | -1.279804 |
| Mg | -4.184360 | 2.318386  | 2.295364  |
| Mg | -3.797089 | -2.024969 | -0.741122 |
| Mg | -2.815750 | 4.297201  | -0.375151 |
| Mg | -1.299998 | 1.361257  | 4.283058  |
| Mg | -1.260950 | -2.344489 | 4.062733  |
| Mg | -0.656021 | 1.852598  | -4.761593 |
| Mg | -0.603244 | -1.735022 | -4.977790 |
| Mg | 0.726049  | 4.310467  | 0.239142  |
| Mg | 0.880591  | -4.768153 | -0.286074 |
| Mg | 1.967435  | -0.453288 | 4.556971  |
| Mg | 2.174233  | 2.671165  | -2.702243 |



|          |           |           |           |
|----------|-----------|-----------|-----------|
| Mg       | 2.302882  | -2.716594 | -3.033900 |
| Mg       | 3.948143  | 2.495872  | 0.552972  |
| Mg       | 4.082562  | -2.847210 | 0.261571  |
| 30       |           |           |           |
| Al17Mg13 |           |           |           |
| Al       | -2.457136 | -0.164757 | -2.519691 |
| Al       | 1.904427  | 1.925426  | -2.458742 |
| Al       | -0.375914 | -2.149128 | -2.198199 |
| Al       | 2.200360  | -0.856096 | -2.106113 |
| Al       | -0.084954 | 0.454110  | -1.496422 |
| Al       | -2.302110 | 1.665203  | -0.434157 |
| Al       | -4.215921 | -0.245061 | -0.382096 |
| Al       | 0.300475  | 2.917221  | -0.362612 |
| Al       | -1.809248 | -1.213494 | -0.065744 |
| Al       | 2.215722  | 0.926206  | 0.014178  |
| Al       | 0.863449  | -1.590614 | 0.189201  |
| Al       | 3.495414  | -1.380937 | 0.374782  |
| Al       | -0.305538 | 0.760348  | 1.212946  |
| Al       | -2.813342 | 0.328422  | 1.971513  |
| Al       | 1.541187  | 2.437600  | 2.126525  |
| Al       | -0.744936 | -1.633553 | 2.416548  |
| Al       | 1.835072  | -0.345343 | 2.444910  |
| Mg       | 0.245592  | -0.077038 | -4.563747 |
| Mg       | -1.214866 | 2.853924  | -3.203529 |
| Mg       | -3.529823 | -3.064670 | -1.933205 |
| Mg       | 4.868313  | 0.777159  | -1.666454 |
| Mg       | 2.301501  | -3.908876 | -1.366995 |
| Mg       | 3.308725  | 3.866312  | -0.228429 |
| Mg       | -0.902821 | -4.199791 | 0.340318  |
| Mg       | -4.969100 | 2.466406  | 1.045707  |
| Mg       | -3.843274 | -2.639833 | 1.852738  |
| Mg       | 4.570081  | 1.194494  | 2.080981  |
| Mg       | -1.618553 | 3.461421  | 2.156491  |
| Mg       | 1.999925  | -3.483641 | 2.422592  |
| Mg       | -0.462706 | 0.918578  | 4.336706  |
| 30       |           |           |           |
| Al18Mg12 |           |           |           |
| Al       | 3.041328  | -0.354027 | -2.975004 |
| Al       | -1.627018 | -1.556038 | -2.902152 |
| Al       | 1.508223  | 1.925987  | -2.564289 |
| Al       | -1.320183 | 1.243568  | -2.512051 |
| Al       | 0.657099  | -0.573677 | -1.958272 |
| Al       | 2.563516  | -2.167917 | -0.882941 |
| Al       | -0.244970 | -2.892058 | -0.807115 |
| Al       | 2.784313  | 0.614486  | -0.441535 |
| Al       | -1.624890 | -0.539643 | -0.438340 |
| Al       | 0.203929  | 1.553853  | -0.252760 |
| Al       | -2.469655 | 2.002609  | 0.045915  |
| Al       | 0.856941  | -0.933567 | 0.772675  |
| Al       | -3.529216 | -0.289820 | 1.366036  |
| Al       | -0.501464 | 3.212725  | 1.683161  |
| Al       | -1.390151 | -2.134561 | 1.752786  |
| Al       | -1.106435 | 0.626415  | 2.057230  |
| Al       | 1.587383  | 1.344259  | 2.093745  |
| Al       | 0.582385  | -0.959776 | 3.405287  |
| Mg       | 0.396810  | 0.112890  | -4.993774 |
| Mg       | 1.240807  | -3.119268 | -3.665345 |
| Mg       | -4.302923 | 0.174448  | -1.875292 |
| Mg       | -0.736197 | 4.244547  | -1.515016 |
| Mg       | 5.473947  | -0.915395 | -1.045342 |
| Mg       | -3.460834 | -3.062327 | -0.538502 |
| Mg       | 2.409338  | 3.752862  | 0.102946  |
| Mg       | 1.363670  | -3.828116 | 1.816475  |
| Mg       | 3.665675  | -1.118899 | 2.137960  |
| Mg       | -3.412882 | 2.531845  | 3.015862  |
| Mg       | -2.526990 | -0.877999 | 4.421811  |
| Mg       | -0.081557 | 1.982594  | 4.695845  |
| 30       |           |           |           |
| Al19Mg11 |           |           |           |
| Al       | -2.919576 | 1.036820  | -0.316217 |
| Al       | -2.791763 | -0.541562 | 2.127332  |
| Al       | -2.575631 | -0.668470 | -2.560188 |
| Al       | -2.266299 | -3.250705 | 1.569578  |
| Al       | -1.655830 | -1.393658 | -0.171530 |

|    |           |           |           |
|----|-----------|-----------|-----------|
| Al | -0.782969 | 3.069930  | -0.289136 |
| Al | -0.661726 | 0.809844  | 1.213540  |
| Al | -0.511183 | 0.704140  | -1.590242 |
| Al | -0.237383 | -1.661347 | 2.345175  |
| Al | -0.043738 | -1.920377 | -2.353859 |
| Al | 0.127756  | -3.451651 | 0.146227  |
| Al | 0.688732  | 2.888706  | 2.125781  |
| Al | 0.979790  | 2.680649  | -2.493018 |
| Al | 1.018993  | -0.941175 | -0.053075 |
| Al | 1.671183  | 1.733674  | -0.082666 |
| Al | 1.816688  | 0.266843  | 2.325011  |
| Al | 2.067574  | 0.073571  | -2.311138 |
| Al | 2.335608  | -2.394490 | 1.685390  |
| Al | 3.552996  | -0.227966 | 0.190779  |
| Mg | -4.748200 | -1.640041 | -0.178480 |
| Mg | -2.699968 | 2.876576  | 2.314782  |
| Mg | -2.458469 | -3.959860 | -1.729466 |
| Mg | -2.393373 | 2.678180  | -3.059739 |
| Mg | -0.642105 | 0.784104  | 4.356069  |
| Mg | -0.135588 | 0.340955  | -4.657251 |
| Mg | 0.348248  | -4.643942 | 3.047647  |
| Mg | 1.821806  | 4.867001  | -0.216791 |
| Mg | 2.936375  | -2.982304 | -1.489051 |
| Mg | 3.954513  | 2.538517  | 1.917029  |
| Mg | 4.203536  | 2.328040  | -1.812493 |

30  
Al20Mg10

|    |           |           |           |
|----|-----------|-----------|-----------|
| Al | 1.273849  | 1.235806  | -3.099588 |
| Al | -0.090096 | -1.007278 | -2.201325 |
| Al | -2.763491 | -1.004044 | -2.172054 |
| Al | -1.405860 | 1.508516  | -2.147002 |
| Al | 1.266865  | -3.213182 | -1.538803 |
| Al | 2.640498  | -0.694938 | -1.477178 |
| Al | 0.575181  | 3.422111  | -1.429795 |
| Al | 3.018440  | 2.068988  | -1.037824 |
| Al | 0.697639  | 0.948140  | -0.505681 |
| Al | -1.365277 | -2.825441 | -0.495040 |
| Al | -1.646039 | -0.191612 | 0.073993  |
| Al | 0.830391  | -1.554643 | 0.454397  |
| Al | -1.309061 | 2.547992  | 0.471868  |
| Al | 2.790025  | 0.319496  | 1.176244  |
| Al | 1.492999  | 2.875274  | 1.208427  |
| Al | 0.165176  | 0.603176  | 2.093004  |
| Al | -1.216941 | -1.755221 | 2.268289  |
| Al | -2.502722 | 0.874691  | 2.371641  |
| Al | 1.518240  | -1.482989 | 3.018562  |
| Al | -0.644038 | 2.891653  | 3.051418  |
| Mg | -1.221701 | 0.049427  | -4.918675 |
| Mg | 2.036478  | -1.707013 | -4.387666 |
| Mg | -1.274343 | -3.563383 | -3.571998 |
| Mg | -4.187102 | 1.533438  | -0.490525 |
| Mg | 3.683777  | -2.754928 | 0.774094  |
| Mg | -4.132258 | -1.821341 | 0.879893  |
| Mg | -0.282100 | 5.456289  | 0.993500  |
| Mg | 0.528437  | -4.408181 | 1.596001  |
| Mg | 2.325447  | 1.639900  | 4.073991  |
| Mg | -0.802416 | 0.009295  | 4.967834  |

30  
Al21Mg9

|    |           |           |           |
|----|-----------|-----------|-----------|
| Al | -1.678277 | -1.804311 | -2.829883 |
| Al | -2.171918 | 1.126155  | -2.592157 |
| Al | 1.184437  | -2.259442 | -2.445974 |
| Al | 0.352888  | 2.407002  | -2.054282 |
| Al | 2.448755  | 0.334852  | -1.909009 |
| Al | -1.927107 | 3.724227  | -1.504826 |
| Al | -0.137819 | -0.187623 | -1.480783 |
| Al | -2.767881 | -0.758425 | -0.528005 |
| Al | -0.692349 | -2.781706 | -0.447441 |
| Al | -1.543548 | 1.673018  | 0.024327  |
| Al | 1.782328  | -1.507733 | 0.107277  |
| Al | 1.246265  | 1.334703  | 0.353466  |
| Al | 0.124054  | 3.751569  | 0.402800  |
| Al | 3.656433  | 0.310136  | 0.654954  |
| Al | -0.546632 | -0.550878 | 1.111275  |

|    |           |           |           |
|----|-----------|-----------|-----------|
| Al | -2.355297 | -2.347637 | 1.786655  |
| Al | -2.880460 | 0.423638  | 2.069085  |
| Al | 0.435708  | -2.774785 | 2.190289  |
| Al | -0.409561 | 1.775757  | 2.563642  |
| Al | 1.656226  | -0.198524 | 2.642466  |
| Al | -0.913271 | -0.788156 | 3.689856  |
| Mg | 0.371312  | 0.207972  | -4.509633 |
| Mg | 4.371230  | -2.121984 | -1.507544 |
| Mg | -3.625799 | -3.734844 | -0.938857 |
| Mg | 3.234575  | 3.323243  | -0.932586 |
| Mg | -4.591223 | 1.861789  | -0.551059 |
| Mg | 1.820850  | -4.624298 | -0.190656 |
| Mg | -2.774233 | 3.838962  | 1.853127  |
| Mg | 3.720073  | -2.548157 | 2.330049  |
| Mg | 2.610242  | 2.895483  | 2.643429  |

30

Al22Mg8

|    |           |           |           |
|----|-----------|-----------|-----------|
| Al | -3.638823 | 0.937979  | -0.058756 |
| Al | -2.775294 | 2.985814  | -1.774418 |
| Al | -2.090297 | 0.451216  | -2.348564 |
| Al | -1.923127 | 0.779017  | 2.357577  |
| Al | -1.653056 | -0.836804 | 0.087252  |
| Al | -1.384114 | -3.487357 | 0.216422  |
| Al | -1.149131 | 1.955953  | -0.048786 |
| Al | -0.749664 | -2.180065 | -2.184949 |
| Al | -0.622818 | -1.773139 | 2.516256  |
| Al | -0.083610 | 2.507299  | -2.517082 |
| Al | 0.125439  | 2.800500  | 2.238902  |
| Al | 0.430878  | 0.130795  | -1.427167 |
| Al | 0.495041  | 0.490644  | 3.834732  |
| Al | 0.529146  | 0.346255  | 1.232812  |
| Al | 0.862219  | -4.153585 | -1.330495 |
| Al | 0.903031  | -2.071842 | 0.201648  |
| Al | 1.589512  | 2.439546  | -0.205343 |
| Al | 2.099147  | -1.776835 | -2.250708 |
| Al | 2.220283  | -1.311050 | 2.494541  |
| Al | 2.594059  | 1.170458  | -2.432056 |
| Al | 2.659600  | 1.494848  | 2.248090  |
| Al | 2.914181  | -0.160395 | -0.043691 |
| Mg | -3.923652 | -2.098517 | -1.598918 |
| Mg | -3.819145 | -1.818671 | 2.044595  |
| Mg | -3.114936 | 3.673477  | 1.603650  |
| Mg | -0.382702 | 4.946636  | -0.390110 |
| Mg | 0.342129  | -0.106536 | -4.516776 |
| Mg | 1.047398  | -4.495900 | 2.111590  |
| Mg | 3.783687  | -3.230726 | 0.118320  |
| Mg | 4.714620  | 2.390985  | -0.178566 |

30

Al23Mg7

|    |           |           |           |
|----|-----------|-----------|-----------|
| Al | 0.895621  | 0.087687  | -3.646509 |
| Al | 2.258716  | 2.452504  | -2.984312 |
| Al | 3.580452  | -0.036903 | -2.835164 |
| Al | -0.395520 | 2.137460  | -2.091679 |
| Al | 1.788003  | -1.972199 | -1.845979 |
| Al | -0.599965 | -0.581783 | -1.488832 |
| Al | 1.709551  | 0.673530  | -1.118410 |
| Al | -2.966436 | -1.789109 | -0.945796 |
| Al | 4.019434  | 1.914158  | -0.844521 |
| Al | -2.644751 | 1.029430  | -0.520564 |
| Al | 1.615000  | 3.289227  | -0.381831 |
| Al | -0.480839 | -3.076904 | -0.259612 |
| Al | 3.779569  | -0.793918 | -0.138501 |
| Al | -0.141382 | 1.479955  | 0.608791  |
| Al | 1.247170  | -1.142719 | 0.761768  |
| Al | -1.376702 | -0.830052 | 1.042176  |
| Al | -3.978867 | -0.614063 | 1.389939  |
| Al | 2.511524  | 1.249172  | 1.440523  |
| Al | -2.650336 | -3.089472 | 1.529214  |
| Al | -2.218599 | 1.403686  | 2.342097  |
| Al | -0.074765 | -2.676395 | 2.560918  |
| Al | 0.255136  | 0.139706  | 3.027769  |
| Al | -2.216275 | -1.134218 | 3.524077  |
| Mg | -2.562885 | 0.329276  | -3.677309 |
| Mg | -0.847578 | -2.919375 | -3.470958 |

|         |           |           |           |
|---------|-----------|-----------|-----------|
| Mg      | -1.720084 | 4.074394  | 0.134268  |
| Mg      | 2.512076  | -3.943149 | 0.616559  |
| Mg      | -4.965084 | 2.376301  | 1.128269  |
| Mg      | 0.572131  | 3.362823  | 2.935446  |
| Mg      | 3.095685  | -1.399050 | 3.208162  |
| 30      |           |           |           |
| Al24Mg6 |           |           |           |
| Al      | -3.510548 | 0.469847  | -2.352990 |
| Al      | -2.860781 | -0.070806 | 0.327959  |
| Al      | -2.451415 | -2.682133 | 1.049251  |
| Al      | -2.434930 | 2.548107  | -0.742827 |
| Al      | -2.236004 | -1.996595 | -1.817472 |
| Al      | -1.552524 | 2.284086  | -3.389420 |
| Al      | -1.442142 | -0.458524 | -4.048470 |
| Al      | -1.267578 | -0.688431 | 2.643821  |
| Al      | -0.975996 | 0.438738  | -1.624127 |
| Al      | -0.557188 | 1.376398  | 0.843182  |
| Al      | -0.390002 | -1.465598 | 0.070202  |
| Al      | 0.365692  | 2.807869  | -1.355847 |
| Al      | 0.411209  | 1.601177  | 3.363981  |
| Al      | 0.449462  | -2.880031 | 2.204191  |
| Al      | 0.552265  | -1.709233 | -2.497373 |
| Al      | 0.938471  | 0.954697  | -3.465686 |
| Al      | 1.071782  | -0.990665 | 4.214441  |
| Al      | 1.315286  | -0.317503 | 1.683974  |
| Al      | 1.606250  | 0.349703  | -0.898549 |
| Al      | 2.068472  | 2.248094  | 1.092285  |
| Al      | 2.220881  | -2.271965 | -0.056632 |
| Al      | 3.095087  | 0.764245  | 3.278019  |
| Al      | 3.133954  | -1.983278 | 2.575913  |
| Al      | 3.803266  | -0.001041 | 0.664635  |
| Mg      | -5.163116 | -1.891713 | -0.714224 |
| Mg      | -2.912417 | 2.096333  | 2.703871  |
| Mg      | -0.345673 | 4.390828  | 1.378401  |
| Mg      | -0.210144 | -4.426932 | -0.715638 |
| Mg      | 3.567712  | 2.544473  | -1.761400 |
| Mg      | 3.710669  | -1.040147 | -2.653472 |
| 30      |           |           |           |
| Al25Mg5 |           |           |           |
| Al      | -3.988161 | 0.532527  | -0.334757 |
| Al      | -3.245157 | -1.928842 | 0.406607  |
| Al      | -2.874494 | 2.804529  | 0.621207  |
| Al      | -2.239266 | -0.898351 | -1.932276 |
| Al      | -2.132912 | 1.846856  | -1.838108 |
| Al      | -1.645614 | -1.836246 | 2.532587  |
| Al      | -1.532386 | 0.409623  | 0.837045  |
| Al      | -1.062387 | 2.496161  | 2.602697  |
| Al      | -0.727653 | 0.384912  | -3.851497 |
| Al      | -0.591719 | -1.990857 | -0.000038 |
| Al      | -0.166009 | 2.747671  | 0.071581  |
| Al      | -0.049035 | 0.140273  | 3.315646  |
| Al      | 0.111935  | 0.389164  | -1.324990 |
| Al      | 0.354629  | 2.717021  | -2.704172 |
| Al      | 0.524014  | -1.897225 | -2.584212 |
| Al      | 1.006079  | -2.430817 | 2.428553  |
| Al      | 1.242349  | -0.229440 | 0.948182  |
| Al      | 1.649237  | 2.129862  | 2.071044  |
| Al      | 1.655267  | -3.240974 | -0.256546 |
| Al      | 1.958051  | 0.557377  | -3.302063 |
| Al      | 2.275852  | 1.941227  | -0.804290 |
| Al      | 2.646423  | -0.245893 | 3.268587  |
| Al      | 2.733059  | -0.921056 | -1.175408 |
| Al      | 3.453621  | -1.963369 | 1.292751  |
| Al      | 3.844368  | 0.688119  | 0.970345  |
| Mg      | -3.742221 | 0.578349  | 2.966001  |
| Mg      | -1.826232 | -4.029289 | -1.986071 |
| Mg      | -1.706440 | 4.960602  | -1.528247 |
| Mg      | -0.916717 | -4.749964 | 1.381720  |
| Mg      | 4.991520  | 1.038049  | -2.091877 |
| 30      |           |           |           |
| Al26Mg4 |           |           |           |
| Al      | -3.967208 | -0.662838 | -0.272264 |
| Al      | -3.759393 | 1.657793  | 0.931735  |
| Al      | -3.293084 | -0.725148 | 2.526258  |

|    |           |           |           |
|----|-----------|-----------|-----------|
| Al | -2.606322 | -2.724541 | 0.672713  |
| Al | -2.374689 | 1.323049  | -1.438179 |
| Al | -2.118833 | 1.845708  | 2.970557  |
| Al | -1.551176 | -1.357340 | -1.432389 |
| Al | -1.419284 | -0.003049 | 0.878043  |
| Al | -1.284681 | 2.819299  | 0.503824  |
| Al | -0.828166 | -0.285650 | 3.825402  |
| Al | -0.773388 | 0.405483  | -3.391238 |
| Al | -0.551905 | -2.365698 | 2.263743  |
| Al | -0.070082 | -3.408390 | -0.333237 |
| Al | 0.467940  | 1.044889  | -0.965153 |
| Al | 0.502046  | 1.382526  | 2.130731  |
| Al | 0.905295  | -1.541220 | -2.369965 |
| Al | 1.075082  | -1.088453 | 0.412912  |
| Al | 1.342013  | 3.336018  | 0.400774  |
| Al | 1.782350  | -0.895775 | 2.993321  |
| Al | 1.847533  | 0.811248  | -3.422234 |
| Al | 1.881648  | -3.407479 | 1.692819  |
| Al | 2.647344  | -3.021842 | -0.900713 |
| Al | 2.859738  | 1.082480  | 0.961364  |
| Al | 2.863370  | 2.360258  | -1.517923 |
| Al | 3.166236  | -0.330268 | -1.314422 |
| Al | 3.737169  | -1.509784 | 1.119584  |
| Mg | -3.833932 | -0.645654 | -3.483441 |
| Mg | -0.109560 | 3.561767  | -2.600707 |
| Mg | -0.109550 | 4.324949  | 3.092682  |
| Mg | 3.573489  | -1.982339 | -3.934600 |

30

Al<sub>27</sub>Mg<sub>3</sub>

|    |           |           |           |
|----|-----------|-----------|-----------|
| Al | -0.123499 | -0.934572 | -4.061518 |
| Al | -0.577304 | 1.410972  | -2.767526 |
| Al | 1.736440  | -2.428672 | -2.692347 |
| Al | 2.076151  | 0.344313  | -2.618463 |
| Al | -1.030582 | -3.032276 | -2.547124 |
| Al | -2.492657 | -0.668217 | -2.333320 |
| Al | 1.587717  | 2.936317  | -2.131265 |
| Al | -3.095997 | 1.896968  | -1.847067 |
| Al | 0.001478  | -0.815142 | -1.386879 |
| Al | -0.903785 | 3.366746  | -0.966037 |
| Al | 0.584373  | -3.356365 | -0.360009 |
| Al | 2.543255  | -1.125765 | -0.311895 |
| Al | -2.023183 | -2.180614 | -0.038232 |
| Al | 0.983917  | 1.362343  | 0.046689  |
| Al | -1.637640 | 0.774465  | 0.205479  |
| Al | 1.461358  | 4.084948  | 0.261170  |
| Al | -3.191876 | 3.047241  | 0.543579  |
| Al | 0.211755  | -1.055524 | 1.195367  |
| Al | -0.686768 | 3.118740  | 1.699264  |
| Al | 2.109397  | -2.854905 | 1.887389  |
| Al | -0.653805 | -3.462985 | 2.079672  |
| Al | 2.474160  | -0.110584 | 2.269641  |
| Al | 1.952638  | 2.519243  | 2.350731  |
| Al | -2.095786 | -1.121873 | 2.540333  |
| Al | -2.730944 | 1.479708  | 2.635925  |
| Al | -0.104764 | 0.870839  | 3.035399  |
| Al | 0.515610  | -1.665183 | 3.787583  |
| Mg | 3.655994  | -4.061891 | -0.675755 |
| Mg | 4.012683  | 1.793528  | -0.159765 |
| Mg | -4.558338 | -0.131805 | 0.358984  |

30

Al<sub>28</sub>Mg<sub>2</sub>

|    |           |           |           |
|----|-----------|-----------|-----------|
| Al | 0.769645  | 1.943215  | -3.510258 |
| Al | -2.077677 | -1.746456 | -3.146870 |
| Al | 0.449727  | -0.744317 | -3.005711 |
| Al | -1.679569 | 1.191088  | -2.817586 |
| Al | 2.806813  | 0.330626  | -2.322344 |
| Al | 2.377549  | -2.413713 | -2.036573 |
| Al | 2.562651  | 3.091185  | -1.975176 |
| Al | -3.768303 | -0.226943 | -1.611899 |
| Al | -0.455621 | 3.596922  | -1.479795 |
| Al | -0.147177 | -3.041344 | -1.373548 |
| Al | -1.193801 | -0.622984 | -0.891636 |
| Al | 0.673229  | 1.409765  | -0.782876 |
| Al | -2.845904 | -2.747224 | -0.693645 |

|    |           |           |           |
|----|-----------|-----------|-----------|
| Al | 4.135736  | -1.202940 | -0.453592 |
| Al | -2.371551 | 1.844896  | -0.250003 |
| Al | 1.438711  | -0.946104 | 0.075151  |
| Al | 3.380423  | 1.394488  | 0.087273  |
| Al | 1.709027  | 3.685086  | 0.434755  |
| Al | -3.214023 | -0.621385 | 1.039671  |
| Al | -0.811939 | -2.374580 | 1.241940  |
| Al | -0.641759 | 0.400855  | 1.426808  |
| Al | -0.655584 | 3.090228  | 1.483014  |
| Al | 3.342330  | -0.624411 | 2.016031  |
| Al | 1.677571  | 1.532722  | 2.151129  |
| Al | -2.775614 | 1.614196  | 2.557425  |
| Al | 0.899547  | -1.099838 | 3.023193  |
| Al | -1.862712 | -0.923623 | 3.435849  |
| Al | -0.398928 | 1.367283  | 3.904050  |
| Mg | 2.226604  | -3.687806 | 1.098180  |
| Mg | -3.549403 | -3.468888 | 2.377043  |

30

Al29Mg1

|    |           |           |           |
|----|-----------|-----------|-----------|
| Al | -4.103282 | 0.297258  | 0.473715  |
| Al | -3.255818 | -2.090490 | 1.426536  |
| Al | -2.977971 | -1.556868 | -1.369690 |
| Al | -2.510606 | 1.109104  | -1.692976 |
| Al | -2.490454 | 0.330366  | 2.869588  |
| Al | -2.432507 | 2.439290  | 0.781998  |
| Al | -1.645788 | -0.536277 | -3.643466 |
| Al | -1.498859 | 3.628449  | -1.720696 |
| Al | -1.469700 | -0.283382 | 0.563964  |
| Al | -1.177876 | -3.011089 | -2.839959 |
| Al | -1.057217 | -3.025435 | -0.076970 |
| Al | -0.716448 | -2.034563 | 2.489542  |
| Al | -0.225500 | 4.180088  | 0.619396  |
| Al | -0.154479 | 1.906231  | 2.241272  |
| Al | -0.086894 | 1.616841  | -3.161005 |
| Al | -0.076454 | 1.686199  | -0.478142 |
| Al | 0.033025  | 0.028127  | 4.027059  |
| Al | 0.066320  | -0.885168 | -1.534939 |
| Al | 1.171028  | -3.425665 | -1.704031 |
| Al | 1.217600  | -0.309804 | 1.000738  |
| Al | 1.259757  | 3.664930  | -1.697302 |
| Al | 1.464804  | -3.018262 | 0.967218  |
| Al | 1.825736  | -1.819036 | 3.444419  |
| Al | 2.091678  | 2.672584  | 0.807023  |
| Al | 2.223051  | 1.060374  | -1.718582 |
| Al | 2.531590  | 0.844800  | 2.947889  |
| Al | 2.826641  | -1.467233 | -0.957957 |
| Al | 3.714942  | -1.569911 | 1.651968  |
| Al | 3.846179  | 0.737425  | 0.426538  |
| Mg | 1.607501  | -1.168886 | -4.143149 |

30

Al30Mg0

|    |           |           |           |
|----|-----------|-----------|-----------|
| Al | -4.041901 | 0.534098  | -0.391753 |
| Al | -3.068223 | 2.510683  | 1.190031  |
| Al | -2.932051 | -0.200502 | 2.173576  |
| Al | -2.690179 | -1.885171 | -0.138200 |
| Al | -2.267431 | -0.315359 | -2.359985 |
| Al | -2.219766 | 2.443687  | -1.568929 |
| Al | -1.996588 | -2.786485 | 2.327327  |
| Al | -1.428290 | 0.640722  | 0.180988  |
| Al | -1.051147 | -4.174162 | 0.220223  |
| Al | -0.923646 | 1.742581  | 2.772129  |
| Al | -0.837496 | 1.517036  | -3.763623 |
| Al | -0.627608 | -2.605167 | -1.960075 |
| Al | -0.498106 | 3.322445  | 0.536079  |
| Al | -0.316555 | -0.856687 | 3.136627  |
| Al | -0.216101 | -1.073156 | -4.168796 |
| Al | -0.012673 | -1.600678 | 0.572068  |
| Al | 0.409964  | -0.031011 | -1.649408 |
| Al | 0.625883  | 2.642689  | -1.816013 |
| Al | 0.650691  | -3.539195 | 2.286007  |
| Al | 1.075306  | 0.981612  | 0.898173  |
| Al | 1.375163  | 3.258715  | 2.564238  |
| Al | 1.548220  | -3.535349 | -0.426800 |
| Al | 1.720647  | 0.892760  | 3.620699  |

|    |          |           |           |
|----|----------|-----------|-----------|
| Al | 1.806459 | 0.751964  | -3.787658 |
| Al | 1.988380 | -1.900503 | -2.740809 |
| Al | 2.272550 | -1.359319 | 2.303753  |
| Al | 2.380503 | 3.343239  | 0.152727  |
| Al | 2.723843 | -1.102495 | -0.260803 |
| Al | 2.974373 | 1.247026  | -1.384814 |
| Al | 3.575781 | 1.135980  | 1.483019  |

35

Al0Mg35

|    |           |           |           |
|----|-----------|-----------|-----------|
| Mg | -0.274785 | -1.082765 | -6.420289 |
| Mg | -2.298373 | -3.530067 | -4.972303 |
| Mg | -2.117919 | 1.449919  | -4.770730 |
| Mg | 1.410337  | 1.315598  | -4.446904 |
| Mg | 2.434672  | -2.077979 | -4.370590 |
| Mg | -4.168095 | -1.029451 | -3.303799 |
| Mg | -0.658746 | -1.180921 | -2.916484 |
| Mg | 0.384535  | -4.557310 | -2.903577 |
| Mg | -0.469006 | 3.838299  | -2.723180 |
| Mg | 3.073362  | 3.689719  | -2.436169 |
| Mg | 4.110878  | 0.289265  | -2.320635 |
| Mg | -2.747232 | -3.712267 | -1.472078 |
| Mg | -2.537811 | 1.356085  | -1.254833 |
| Mg | 0.995133  | 1.176304  | -0.950954 |
| Mg | 2.062325  | -2.208589 | -0.850465 |
| Mg | -2.399598 | 4.601697  | 0.161259  |
| Mg | 1.131278  | 4.421617  | 0.430799  |
| Mg | -4.584889 | -1.139170 | 0.221822  |
| Mg | 3.938403  | 2.246405  | 0.677533  |
| Mg | -1.088034 | -1.342924 | 0.539589  |
| Mg | -0.004994 | -4.688124 | 0.624440  |
| Mg | 5.001611  | -1.133473 | 0.811844  |
| Mg | -4.450431 | 2.121591  | 1.628635  |
| Mg | -0.935037 | 1.887244  | 1.882865  |
| Mg | 1.840701  | -0.263657 | 2.126877  |
| Mg | -3.165509 | -3.855054 | 2.027921  |
| Mg | 2.950808  | -3.613554 | 2.279292  |
| Mg | -0.820512 | 5.115852  | 3.292155  |
| Mg | 1.993057  | 2.977278  | 3.572403  |
| Mg | -3.017545 | -0.595635 | 3.399417  |
| Mg | 4.770086  | 0.783725  | 3.783591  |
| Mg | -0.210437 | -2.770824 | 3.646181  |
| Mg | -2.844811 | 2.667900  | 4.740551  |
| Mg | -0.049255 | 0.507498  | 5.033776  |
| Mg | 2.745835  | -1.664234 | 5.232040  |

35

Al1Mg34

|    |           |           |           |
|----|-----------|-----------|-----------|
| Al | 2.079360  | 0.457443  | 2.293348  |
| Mg | -2.544357 | -1.822111 | -5.114158 |
| Mg | -0.454252 | 1.080996  | -5.009128 |
| Mg | 2.354245  | -0.930131 | -4.226325 |
| Mg | 0.463228  | -3.785890 | -4.159324 |
| Mg | -3.657934 | 1.293979  | -3.615082 |
| Mg | 2.138546  | 2.269526  | -2.950068 |
| Mg | -2.568722 | -4.341518 | -2.613081 |
| Mg | -1.295327 | 3.540424  | -2.480561 |
| Mg | 5.172929  | 0.040784  | -2.260963 |
| Mg | -0.810850 | -1.045669 | -2.242788 |
| Mg | -4.732193 | -1.626238 | -2.203798 |
| Mg | 3.534434  | -3.590499 | -2.177922 |
| Mg | -4.581054 | 3.574998  | -0.939720 |
| Mg | 1.462467  | 5.012392  | -0.748234 |
| Mg | 2.285455  | -0.799438 | -0.661405 |
| Mg | 0.344417  | -3.992211 | -0.586150 |
| Mg | -2.903802 | 0.698273  | -0.171110 |
| Mg | 0.349640  | 1.810031  | -0.009988 |
| Mg | 3.719941  | 2.249465  | 0.145728  |
| Mg | -3.212021 | -3.069213 | 0.550430  |
| Mg | -1.717976 | 4.329782  | 1.044381  |
| Mg | -5.810400 | -0.642557 | 1.088840  |
| Mg | -0.433224 | -1.179450 | 1.269296  |
| Mg | 4.988878  | -0.654093 | 1.377185  |
| Mg | 2.429924  | -2.786031 | 2.098588  |
| Mg | 1.724689  | 3.681997  | 2.505505  |
| Mg | -4.305976 | 2.306086  | 2.526197  |

|    |           |           |          |
|----|-----------|-----------|----------|
| Mg | -0.808342 | -4.192121 | 2.897847 |
| Mg | -0.850155 | 1.594266  | 3.173113 |
| Mg | 4.639311  | 2.105934  | 3.387648 |
| Mg | -3.134440 | -1.047827 | 3.439258 |
| Mg | 0.453575  | -1.285375 | 4.512399 |
| Mg | 3.844632  | -0.968055 | 4.588910 |
| Mg | 1.835354  | 1.712051  | 5.271130 |

35

Al2Mg33

|    |           |           |           |
|----|-----------|-----------|-----------|
| Al | -1.320002 | -0.170552 | -3.245435 |
| Al | 1.083939  | 1.583556  | 2.651483  |
| Mg | -4.474821 | 0.793493  | 2.895229  |
| Mg | -4.296382 | 0.836824  | -3.941795 |
| Mg | -3.893223 | -2.523661 | 1.176590  |
| Mg | -3.752920 | -2.264685 | -2.621053 |
| Mg | -3.270848 | 0.573073  | -0.711827 |
| Mg | -2.712280 | -1.929779 | 4.728383  |
| Mg | -2.707316 | -1.553223 | -5.791481 |
| Mg | -2.079344 | -5.167296 | -0.781986 |
| Mg | -1.928482 | 2.975835  | -2.699541 |
| Mg | -1.747205 | 3.018617  | 1.784823  |
| Mg | -1.613540 | 1.681356  | -5.860454 |
| Mg | -1.374792 | -0.273852 | 2.100156  |
| Mg | -1.286714 | 1.539690  | 4.898311  |
| Mg | -1.025627 | -1.971710 | -0.720404 |
| Mg | -0.659204 | -3.347136 | -3.736097 |
| Mg | -0.549489 | -3.708840 | 2.324569  |
| Mg | 0.118394  | 1.290980  | -0.584485 |
| Mg | 0.407763  | 4.372342  | 4.096346  |
| Mg | 0.642110  | -0.888383 | -5.704327 |
| Mg | 0.871370  | -1.125295 | 4.474502  |
| Mg | 1.089964  | 1.894196  | -3.812871 |
| Mg | 1.242203  | 4.220555  | 0.806345  |
| Mg | 1.631753  | -4.219768 | -0.561491 |
| Mg | 1.683049  | -1.143823 | 1.147988  |
| Mg | 1.689185  | -1.165314 | -2.472217 |
| Mg | 2.029390  | 1.826689  | 5.705236  |
| Mg | 3.100149  | -3.623651 | 2.927043  |
| Mg | 3.158937  | 4.101104  | -2.090948 |
| Mg | 3.407662  | 1.616680  | 0.374087  |
| Mg | 3.594821  | 3.511366  | 3.187360  |
| Mg | 3.876572  | 0.092613  | 3.392485  |
| Mg | 4.431785  | 0.892181  | -2.926484 |
| Mg | 4.633148  | -1.744182 | -0.408037 |

35

Al3Mg32

|    |           |           |           |
|----|-----------|-----------|-----------|
| Al | -4.060357 | -0.089362 | -1.341890 |
| Al | 4.333966  | 0.137310  | -1.162773 |
| Al | -0.700649 | -0.063642 | 2.753801  |
| Mg | 3.465117  | 0.163903  | -4.271203 |
| Mg | -4.746831 | -1.775861 | -3.968195 |
| Mg | -4.840240 | 1.640860  | -3.913094 |
| Mg | -1.831505 | 0.009898  | -3.718118 |
| Mg | 6.738256  | 0.237475  | -3.291991 |
| Mg | 4.867105  | -2.579116 | -2.810113 |
| Mg | 4.716564  | 2.930659  | -2.720901 |
| Mg | -7.152928 | -0.161163 | -2.132266 |
| Mg | 1.698012  | -1.638105 | -1.983305 |
| Mg | 1.604291  | 1.791770  | -1.927771 |
| Mg | -2.289161 | -2.803299 | -1.810547 |
| Mg | -2.440473 | 2.730976  | -1.721278 |
| Mg | -5.547582 | -2.888829 | -0.833752 |
| Mg | -5.697816 | 2.606854  | -0.745109 |
| Mg | -1.005646 | -0.020157 | -0.453071 |
| Mg | 6.981884  | -1.509216 | -0.365863 |
| Mg | 6.888761  | 1.899285  | -0.310679 |
| Mg | 3.874554  | -2.671346 | 0.457358  |
| Mg | 3.723343  | 2.862816  | 0.546957  |
| Mg | 1.974914  | 0.037937  | 0.993516  |
| Mg | 0.122583  | -2.806416 | 1.111214  |
| Mg | -6.126312 | -0.186051 | 1.151362  |
| Mg | -0.029875 | 2.771600  | 1.201378  |
| Mg | -3.144796 | -1.804652 | 1.368331  |
| Mg | -3.237453 | 1.585145  | 1.423062  |



|    |           |           |          |
|----|-----------|-----------|----------|
| Mg | 5.155718  | 0.108291  | 2.016540 |
| Mg | 1.833745  | -1.726081 | 3.876365 |
| Mg | 1.740186  | 1.697566  | 3.931712 |
| Mg | -1.404944 | -2.855327 | 4.149528 |
| Mg | -1.555089 | 2.638891  | 4.238324 |
| Mg | -3.494290 | -0.165628 | 4.341162 |
| Mg | -0.413052 | -0.106985 | 5.921311 |

35

Al4Mg31

|    |           |           |           |
|----|-----------|-----------|-----------|
| Al | 2.358251  | 1.780540  | -1.748375 |
| Al | 3.415069  | -0.251210 | -0.251876 |
| Al | 1.352347  | 1.230820  | 0.716276  |
| Al | -4.337419 | -1.654095 | 0.816914  |
| Mg | 3.650477  | 2.372063  | -4.673113 |
| Mg | 0.561814  | 0.979465  | -4.372355 |
| Mg | 1.024445  | 4.216566  | -3.451058 |
| Mg | 3.368351  | -0.780211 | -3.437730 |
| Mg | -3.041778 | -0.806769 | -2.090250 |
| Mg | 4.113955  | 4.514020  | -2.077664 |
| Mg | 5.547817  | 1.399288  | -2.017825 |
| Mg | -4.804125 | -3.695351 | -1.624220 |
| Mg | 0.568925  | -0.889768 | -1.609488 |
| Mg | 5.897093  | -1.947062 | -1.491836 |
| Mg | -0.844158 | 2.174056  | -1.484898 |
| Mg | -6.397625 | -0.689163 | -1.456822 |
| Mg | 2.804114  | -3.331355 | -1.197198 |
| Mg | -1.713659 | -3.360721 | -0.208597 |
| Mg | 1.340086  | 4.345690  | -0.064734 |
| Mg | -4.306296 | 1.541209  | 0.063369  |
| Mg | 4.182159  | 2.729809  | 0.753019  |
| Mg | -7.172709 | -3.153006 | 0.783601  |
| Mg | -1.526030 | -0.166269 | 0.852113  |
| Mg | 6.354357  | 0.206813  | 1.094833  |
| Mg | 1.282829  | -1.915180 | 1.527068  |
| Mg | -4.268833 | -4.782904 | 1.559338  |
| Mg | 4.596663  | -2.651089 | 1.607352  |
| Mg | -1.204941 | 3.029711  | 1.802026  |
| Mg | -6.842767 | 0.085660  | 1.831694  |
| Mg | 3.461052  | 0.268062  | 2.938659  |
| Mg | -2.164407 | -2.577761 | 3.098080  |
| Mg | 1.905872  | 3.313118  | 3.152469  |
| Mg | -3.765976 | 0.450394  | 3.269985  |
| Mg | 0.131554  | 0.460217  | 3.694590  |
| Mg | -5.526505 | -2.445588 | 3.696650  |

35

Al5Mg30

|    |           |           |           |
|----|-----------|-----------|-----------|
| Al | -1.927663 | -0.848578 | -3.375955 |
| Al | -0.689895 | -0.625780 | -0.919343 |
| Al | -0.651643 | 1.457450  | -2.705701 |
| Al | 0.680451  | -0.345241 | 1.769964  |
| Al | 1.953824  | -0.005701 | 4.198302  |
| Mg | -5.189942 | -0.822634 | -3.439504 |
| Mg | -3.472943 | 0.981011  | -1.208671 |
| Mg | -3.425572 | -3.647669 | -4.080148 |
| Mg | -3.410052 | -2.360997 | -0.926978 |
| Mg | -3.351068 | -1.006438 | -6.289305 |
| Mg | -3.307425 | 1.864112  | -4.458869 |
| Mg | -2.562142 | -0.377959 | 1.722356  |
| Mg | -2.452218 | 4.073668  | -1.963758 |
| Mg | -0.847550 | 2.228428  | 0.453578  |
| Mg | -0.800253 | 1.633568  | 3.797319  |
| Mg | -0.795778 | -3.156739 | 1.123405  |
| Mg | -0.764851 | -1.758111 | 4.241412  |
| Mg | -0.602429 | 3.916893  | -4.805969 |
| Mg | -0.548335 | -3.556957 | -2.260382 |
| Mg | -0.528901 | -2.770577 | -5.611261 |
| Mg | -0.420625 | 0.657677  | -5.803952 |
| Mg | 0.048745  | 0.317226  | 6.805492  |
| Mg | 0.932562  | 4.135739  | -1.707912 |
| Mg | 1.297612  | -1.012669 | -3.431495 |
| Mg | 1.798946  | 2.954855  | 5.524293  |
| Mg | 1.861268  | -2.518662 | 6.253470  |
| Mg | 2.012399  | 1.033223  | -0.879011 |
| Mg | 2.046023  | -2.303759 | -0.424815 |

|    |          |           |           |
|----|----------|-----------|-----------|
| Mg | 2.060088 | 2.517523  | 2.163290  |
| Mg | 2.118493 | -2.963052 | 2.897934  |
| Mg | 2.203231 | 2.128100  | -4.132952 |
| Mg | 3.448805 | 0.391204  | 7.050895  |
| Mg | 3.873436 | -0.319578 | 1.619636  |
| Mg | 4.687295 | 1.747825  | 4.178499  |
| Mg | 4.726106 | -1.637397 | 4.626134  |

35  
Al6Mg29

|    |           |           |           |
|----|-----------|-----------|-----------|
| Al | 2.657736  | -2.374834 | -1.315356 |
| Al | 0.603437  | -0.401110 | -1.147847 |
| Al | -1.432016 | 1.543895  | -0.916637 |
| Al | -1.450668 | -0.635752 | 0.732090  |
| Al | 0.452542  | 1.318188  | 1.049835  |
| Al | -2.165031 | 1.826742  | 1.734622  |
| Mg | 3.826738  | -3.038670 | -4.234991 |
| Mg | -0.386610 | 1.011883  | -3.906749 |
| Mg | 0.534128  | -2.289062 | -3.741853 |
| Mg | 2.878801  | 0.118101  | -3.350390 |
| Mg | -3.697330 | 1.746072  | -3.208853 |
| Mg | -1.352895 | 4.153002  | -2.817446 |
| Mg | 1.781873  | -5.213735 | -2.549077 |
| Mg | -2.322579 | -1.218746 | -2.311979 |
| Mg | 5.621088  | -1.272200 | -1.908068 |
| Mg | 1.481458  | 2.686689  | -1.676883 |
| Mg | 4.961984  | -4.603615 | -1.411590 |
| Mg | -0.385511 | -3.378575 | -0.636769 |
| Mg | -3.744023 | 3.705070  | -0.358264 |
| Mg | -4.356246 | 0.390824  | -0.173476 |
| Mg | 3.419150  | 0.527493  | -0.001556 |
| Mg | -3.695441 | -2.908057 | 0.280465  |
| Mg | -0.528996 | 4.320092  | 0.465484  |
| Mg | 2.345475  | -4.826806 | 0.790386  |
| Mg | 4.726007  | -2.382831 | 1.187846  |
| Mg | 2.677786  | 3.635046  | 1.344485  |
| Mg | 1.459561  | -1.683404 | 1.609465  |
| Mg | -5.269304 | 2.335599  | 2.420075  |
| Mg | -1.336164 | -3.214829 | 2.682686  |
| Mg | -2.898950 | 4.769143  | 2.815800  |
| Mg | -3.746518 | -0.718768 | 2.960586  |
| Mg | 2.687866  | 0.916462  | 3.354508  |
| Mg | 0.086698  | 3.216626  | 3.600540  |
| Mg | -0.532709 | -0.094932 | 3.774580  |
| Mg | -2.901337 | 2.035000  | 4.864334  |

35  
Al7Mg28

|    |           |           |           |
|----|-----------|-----------|-----------|
| Al | -1.874880 | -2.226487 | 0.027372  |
| Al | -1.565073 | -0.059643 | 1.704108  |
| Al | -1.515272 | 0.314029  | -1.026211 |
| Al | 0.239685  | 1.751141  | 0.569067  |
| Al | 0.588641  | -0.953003 | 0.210961  |
| Al | 1.107533  | 0.800392  | -1.868080 |
| Al | 2.802771  | 0.724244  | 0.305168  |
| Mg | -4.775304 | -3.556645 | -0.210556 |
| Mg | -4.420037 | -0.229018 | 0.233836  |
| Mg | -4.061348 | 1.068424  | 3.360649  |
| Mg | -3.935703 | 1.824323  | -2.461551 |
| Mg | -3.542763 | -2.323891 | 2.773599  |
| Mg | -3.454440 | -1.562730 | -2.733223 |
| Mg | -2.839859 | 2.720019  | 0.660135  |
| Mg | -2.140265 | -5.136854 | 1.341887  |
| Mg | -2.114217 | -4.686661 | -2.034244 |
| Mg | -1.487295 | -0.520647 | 4.885250  |
| Mg | -1.157428 | 0.762180  | -4.183329 |
| Mg | -0.917816 | 2.597606  | 3.439606  |
| Mg | -0.897607 | 3.330925  | -1.999577 |
| Mg | -0.209525 | 4.886789  | 0.975982  |
| Mg | -0.154770 | -2.793690 | 2.723816  |
| Mg | -0.150024 | -2.056173 | -2.713196 |
| Mg | 0.799155  | -4.096806 | -0.224869 |
| Mg | 1.326977  | 0.150689  | 3.135003  |
| Mg | 1.614810  | 2.892461  | -4.237455 |
| Mg | 2.077447  | -0.434837 | -4.673746 |
| Mg | 2.304885  | 3.653429  | -0.991873 |

|    |          |           |           |
|----|----------|-----------|-----------|
| Mg | 2.438898 | 3.206884  | 2.369278  |
| Mg | 3.005422 | -1.821487 | -1.702189 |
| Mg | 3.121972 | -2.251451 | 1.630128  |
| Mg | 4.190088 | 1.275873  | -2.541614 |
| Mg | 4.644864 | 0.589559  | 2.941174  |
| Mg | 5.259307 | 2.773050  | 0.384024  |
| Mg | 5.691169 | -0.611992 | -0.069330 |

|         |           |           |           |
|---------|-----------|-----------|-----------|
| 35      |           |           |           |
| Al8Mg27 |           |           |           |
| Al      | -2.103663 | -1.160178 | 0.815690  |
| Al      | -0.974108 | 1.155005  | 1.911862  |
| Al      | -0.762502 | 0.597790  | -0.765212 |
| Al      | -0.393089 | -2.085113 | -1.198258 |
| Al      | 0.635828  | -0.946481 | 1.104848  |
| Al      | 1.051461  | 2.104144  | -1.995679 |
| Al      | 1.431206  | 1.648077  | 0.608044  |
| Al      | 1.793809  | -0.373995 | -1.332870 |
| Mg      | -5.242855 | -1.307673 | 0.382891  |
| Mg      | -3.778019 | 0.261065  | 3.143572  |
| Mg      | -3.613667 | -3.223917 | 2.683593  |
| Mg      | -3.603135 | 1.669758  | 0.035228  |
| Mg      | -3.171764 | -0.735803 | -2.273842 |
| Mg      | -3.051760 | -3.789016 | -0.744042 |
| Mg      | -2.833227 | 3.606084  | 2.727433  |
| Mg      | -1.933776 | 2.580599  | -3.049714 |
| Mg      | -1.597291 | -3.286201 | -3.888344 |
| Mg      | -1.175263 | 1.734163  | 5.022007  |
| Mg      | -0.949914 | 3.749929  | -0.111507 |
| Mg      | -0.921990 | -1.451819 | 3.825636  |
| Mg      | -0.484026 | -3.894217 | 1.481229  |
| Mg      | -0.249849 | -0.154021 | -3.858826 |
| Mg      | 0.066762  | -5.192209 | -1.626470 |
| Mg      | 0.661323  | 3.799893  | 2.817555  |
| Mg      | 1.257050  | 4.214403  | -4.156165 |
| Mg      | 1.755145  | 0.681634  | 3.632569  |
| Mg      | 1.833685  | -2.737850 | -3.457846 |
| Mg      | 2.228481  | 4.625266  | -0.516617 |
| Mg      | 2.229928  | -2.691930 | 3.221074  |
| Mg      | 2.462623  | -3.263773 | -0.154497 |
| Mg      | 2.913262  | 0.806643  | -4.181878 |
| Mg      | 3.818446  | -0.429729 | 1.161079  |
| Mg      | 3.908356  | 2.921645  | 2.052002  |
| Mg      | 4.114843  | 1.936391  | -1.248613 |
| Mg      | 4.677690  | -1.368564 | -2.065934 |

|         |           |           |           |
|---------|-----------|-----------|-----------|
| 35      |           |           |           |
| Al9Mg26 |           |           |           |
| Al      | 1.449338  | -0.201925 | -2.449167 |
| Al      | -0.945438 | 1.042867  | -1.778377 |
| Al      | -0.387263 | -1.542505 | -0.923064 |
| Al      | 2.271878  | -1.701523 | -0.288226 |
| Al      | 1.049508  | 0.678647  | 0.071503  |
| Al      | -0.652474 | 2.748641  | 0.398547  |
| Al      | -1.647593 | 0.226729  | 0.784438  |
| Al      | 0.394040  | -1.399405 | 1.740814  |
| Al      | 0.169948  | 1.248980  | 2.559457  |
| Mg      | 2.133127  | -0.967078 | -5.376751 |
| Mg      | 0.223445  | 1.804154  | -4.647084 |
| Mg      | -1.106678 | -1.285548 | -4.031537 |
| Mg      | -3.172664 | 1.527835  | -3.924715 |
| Mg      | 1.363341  | -3.391284 | -2.872354 |
| Mg      | 4.286775  | -1.691853 | -2.806015 |
| Mg      | -1.435434 | 4.133116  | -2.399352 |
| Mg      | -1.932442 | -4.028126 | -2.059851 |
| Mg      | 1.667244  | 3.046091  | -1.925745 |
| Mg      | -3.468671 | -0.966976 | -1.558304 |
| Mg      | 4.068196  | 0.962964  | -0.880068 |
| Mg      | 3.955940  | -4.289368 | -0.588868 |
| Mg      | -3.669970 | 2.313010  | -0.558625 |
| Mg      | 0.559976  | -4.323995 | 0.346756  |
| Mg      | -2.350349 | 5.327581  | 0.698299  |
| Mg      | -2.435489 | -2.850768 | 1.156083  |
| Mg      | 2.441581  | 3.246371  | 1.323523  |
| Mg      | -4.642727 | -0.223501 | 1.611919  |
| Mg      | 3.260826  | 0.140477  | 2.261446  |

|    |           |           |          |
|----|-----------|-----------|----------|
| Mg | 2.944686  | -3.157193 | 2.502194 |
| Mg | -2.804494 | 2.459394  | 2.774183 |
| Mg | -0.067308 | 4.420232  | 3.093453 |
| Mg | -0.274320 | -3.756702 | 3.689901 |
| Mg | -2.003594 | -0.725618 | 3.819649 |
| Mg | 1.285564  | -0.828389 | 4.749878 |
| Mg | -0.528504 | 2.004669  | 5.486061 |

35  
Al10Mg25

|    |           |           |           |
|----|-----------|-----------|-----------|
| Al | -0.001618 | 1.695350  | -2.433933 |
| Al | -2.167383 | 0.183031  | -1.548030 |
| Al | -1.377483 | -2.431010 | -0.995509 |
| Al | 0.405609  | -0.466809 | -0.951143 |
| Al | 2.008228  | 1.685185  | -0.504496 |
| Al | 2.818950  | -0.921367 | 0.053145  |
| Al | -0.708255 | 1.837356  | 0.189136  |
| Al | 0.639238  | -2.420722 | 0.926766  |
| Al | -1.538792 | -0.653593 | 1.057468  |
| Al | 0.994465  | 0.257720  | 1.690530  |
| Mg | -2.318539 | 1.414786  | -4.550491 |
| Mg | -0.406619 | -1.228724 | -3.913495 |
| Mg | 2.626399  | 3.193678  | -3.314583 |
| Mg | -3.523936 | -2.200004 | -3.290331 |
| Mg | 2.658415  | -0.126036 | -3.147597 |
| Mg | -5.064423 | 0.856100  | -2.388431 |
| Mg | 1.653584  | -3.139904 | -2.096942 |
| Mg | -2.633098 | 3.391865  | -1.846036 |
| Mg | 5.097121  | 0.901448  | -1.136036 |
| Mg | 0.511933  | 4.523278  | -1.060024 |
| Mg | -0.200152 | -5.283442 | -0.359622 |
| Mg | 3.918664  | 4.087693  | -0.143292 |
| Mg | -4.341207 | -1.730933 | -0.060205 |
| Mg | 3.475974  | -3.960973 | 0.559016  |
| Mg | -3.836522 | 1.564342  | 0.818006  |
| Mg | -1.947622 | 4.446819  | 1.392007  |
| Mg | -2.227261 | -3.692092 | 1.803776  |
| Mg | 4.013694  | 1.274621  | 2.027652  |
| Mg | 1.313903  | 3.417165  | 2.105172  |
| Mg | 0.973537  | -4.745469 | 2.935739  |
| Mg | 2.982568  | -1.817895 | 3.105690  |
| Mg | -3.739386 | -0.927139 | 3.265361  |
| Mg | -1.411179 | 1.624019  | 3.309053  |
| Mg | -0.374658 | -1.647273 | 3.870568  |
| Mg | 1.725852  | 1.038928  | 4.631110  |

35  
Al11Mg24

|    |           |           |           |
|----|-----------|-----------|-----------|
| Al | 0.447704  | -0.537278 | -2.622273 |
| Al | -1.100046 | 1.715998  | -1.791847 |
| Al | 1.547458  | 1.435826  | -1.011865 |
| Al | -0.040443 | -2.737605 | -0.955641 |
| Al | 2.140889  | -1.201628 | -0.479362 |
| Al | -0.431713 | -0.266621 | -0.081196 |
| Al | -2.657025 | 1.071765  | 0.448358  |
| Al | -0.293488 | 2.342534  | 0.826792  |
| Al | 1.620172  | 0.520393  | 1.607578  |
| Al | 0.567405  | -2.044931 | 1.691669  |
| Al | -0.980258 | 0.208388  | 2.522135  |
| Mg | 1.402063  | -0.909638 | -5.537959 |
| Mg | -1.691145 | 0.572798  | -4.706250 |
| Mg | 1.196692  | 2.300331  | -4.011532 |
| Mg | -0.856406 | -3.152188 | -3.957500 |
| Mg | -1.942282 | 3.959146  | -3.743639 |
| Mg | 3.620044  | 0.076127  | -3.001731 |
| Mg | 2.413871  | -3.133782 | -2.968436 |
| Mg | -4.293726 | 1.852133  | -2.113091 |
| Mg | -2.741907 | -1.131385 | -2.040197 |
| Mg | 0.614891  | 4.451084  | -1.389520 |
| Mg | -2.615676 | 4.188611  | -0.269747 |
| Mg | 4.482614  | 0.871074  | 0.180097  |
| Mg | 2.503111  | -4.258130 | 0.248572  |
| Mg | -2.656775 | -2.202639 | 1.024913  |
| Mg | 2.652536  | 3.535455  | 1.161818  |
| Mg | -0.714059 | -4.944709 | 1.171266  |
| Mg | 3.764685  | -1.746485 | 2.213082  |

|    |           |           |          |
|----|-----------|-----------|----------|
| Mg | -2.526434 | 3.064265  | 2.947274 |
| Mg | -4.151260 | 0.059529  | 3.015791 |
| Mg | 1.657947  | -4.134761 | 3.690134 |
| Mg | 0.759710  | 2.628673  | 3.825417 |
| Mg | -1.446299 | -2.510308 | 4.116257 |
| Mg | 1.433145  | -0.676316 | 4.506059 |
| Mg | -1.685992 | 0.734272  | 5.484573 |

35

Al12Mg23

|    |           |           |           |
|----|-----------|-----------|-----------|
| Al | -2.539019 | -0.158288 | -1.055022 |
| Al | -1.712977 | 1.167706  | 1.283071  |
| Al | -1.551635 | -1.621031 | 1.120203  |
| Al | -1.002415 | 2.263243  | -1.207325 |
| Al | -0.744863 | -2.378742 | -1.454217 |
| Al | 0.040914  | -0.052464 | -0.421144 |
| Al | 0.504580  | -0.174513 | 2.315704  |
| Al | 0.862870  | 2.183985  | 0.880841  |
| Al | 1.109852  | -2.316922 | 0.639546  |
| Al | 1.745220  | 1.545434  | -1.701145 |
| Al | 1.901579  | -1.323171 | -1.851598 |
| Al | 2.601160  | 0.033270  | 0.491674  |
| Mg | -4.507349 | -0.425816 | 1.420965  |
| Mg | -4.080067 | 2.571392  | -0.282231 |
| Mg | -3.761228 | -3.132362 | -0.518318 |
| Mg | -3.723041 | 2.562967  | 3.185649  |
| Mg | -3.257306 | 1.850949  | -3.435197 |
| Mg | -3.069340 | -1.998475 | -3.600573 |
| Mg | -2.199785 | -0.481232 | 4.003133  |
| Mg | -1.461804 | 4.373489  | 1.119163  |
| Mg | -0.986579 | -4.749446 | 0.652471  |
| Mg | -0.466664 | 0.072741  | -3.550400 |
| Mg | -0.278945 | 2.545716  | 3.812773  |
| Mg | -0.022512 | -3.128525 | 3.492554  |
| Mg | 0.286522  | 3.290276  | -3.933307 |
| Mg | 0.637586  | -2.982982 | -4.260382 |
| Mg | 1.042288  | -0.324278 | 5.360234  |
| Mg | 1.188867  | 4.668565  | -1.009126 |
| Mg | 1.680956  | -4.550742 | -1.482137 |
| Mg | 2.722057  | 0.301803  | -4.467088 |
| Mg | 3.011284  | 1.652497  | 3.191786  |
| Mg | 3.181777  | -1.829671 | 3.008919  |
| Mg | 3.900401  | 2.952089  | 0.167932  |
| Mg | 4.207344  | -2.678042 | -0.131905 |
| Mg | 4.740271  | 0.270581  | -1.785502 |

35

Al13Mg22

|    |           |           |           |
|----|-----------|-----------|-----------|
| Al | 1.308377  | -0.161635 | -2.353728 |
| Al | -1.350028 | -1.012823 | -1.919067 |
| Al | -0.680563 | 1.720207  | -1.638016 |
| Al | 0.807870  | -2.549650 | -0.933835 |
| Al | 1.896165  | 1.859022  | -0.475867 |
| Al | 2.809437  | -0.776814 | -0.043539 |
| Al | 0.198716  | -0.141930 | 0.090467  |
| Al | -2.411359 | 0.487569  | 0.230123  |
| Al | -1.486166 | -2.151810 | 0.662536  |
| Al | -0.397745 | 2.260795  | 1.123191  |
| Al | 1.085567  | -2.004482 | 1.817083  |
| Al | 1.758196  | 0.717298  | 2.102224  |
| Al | -0.898350 | -0.131140 | 2.540381  |
| Mg | -0.777659 | 0.553307  | -4.634285 |
| Mg | 0.331152  | -2.668263 | -4.077892 |
| Mg | -1.671444 | 3.853963  | -3.623605 |
| Mg | 1.712195  | 2.768664  | -3.515149 |
| Mg | -3.633460 | 1.044881  | -2.676917 |
| Mg | 3.490311  | -2.472684 | -2.656735 |
| Mg | 4.331940  | 0.874366  | -2.296774 |
| Mg | -1.788714 | -4.177973 | -1.789836 |
| Mg | -4.234302 | -1.908451 | -0.903369 |
| Mg | 0.410751  | 4.638656  | -0.837598 |
| Mg | -2.886994 | 3.611035  | -0.292087 |
| Mg | -5.402040 | 1.197016  | 0.402924  |
| Mg | 3.319722  | -3.874419 | 0.519277  |
| Mg | 0.049765  | -4.922937 | 1.056765  |
| Mg | 4.662764  | 1.557876  | 1.089065  |

|    |           |           |          |
|----|-----------|-----------|----------|
| Mg | 2.230859  | 3.862246  | 1.991099 |
| Mg | -3.884738 | -1.217296 | 2.525945 |
| Mg | 4.044170  | -1.383866 | 2.833855 |
| Mg | -3.045830 | 2.176966  | 2.893291 |
| Mg | -1.231835 | -3.087996 | 3.708398 |
| Mg | 0.111050  | 2.352598  | 4.279146 |
| Mg | 1.222223  | -0.892295 | 4.802530 |

35  
Al14Mg21

|    |           |           |           |
|----|-----------|-----------|-----------|
| Al | -2.237206 | 0.098689  | 1.262031  |
| Al | -2.212593 | 1.223158  | -1.324288 |
| Al | -1.968490 | -1.579382 | -1.007978 |
| Al | -0.786065 | 2.484805  | 0.770234  |
| Al | -0.419386 | -2.061830 | 1.278080  |
| Al | -0.365767 | -0.225573 | -2.894256 |
| Al | -0.015338 | 0.115754  | -0.254385 |
| Al | 0.321409  | 0.484504  | 2.392174  |
| Al | 0.363065  | 2.279446  | -1.798246 |
| Al | 0.772263  | -2.249515 | -1.273781 |
| Al | 1.369390  | -1.813428 | 3.234196  |
| Al | 1.949687  | 1.797511  | 0.496877  |
| Al | 2.198553  | 0.141587  | -1.785624 |
| Al | 2.200595  | -0.989105 | 0.797432  |
| Mg | -4.862188 | -0.341641 | -0.486503 |
| Mg | -3.964359 | 2.744430  | 0.863803  |
| Mg | -3.480484 | -2.844882 | 1.503002  |
| Mg | -3.439519 | -0.585630 | -3.652864 |
| Mg | -2.021435 | 2.170258  | 3.697291  |
| Mg | -1.987339 | 4.405595  | -1.468911 |
| Mg | -1.749576 | -1.284947 | 4.100172  |
| Mg | -1.671850 | 2.348269  | -4.255157 |
| Mg | -1.172208 | -3.235703 | -3.601024 |
| Mg | -1.130155 | -4.637003 | -0.400861 |
| Mg | -0.470623 | -4.397510 | 3.358762  |
| Mg | 0.926871  | 0.406102  | 5.460498  |
| Mg | 1.177339  | 4.839464  | -0.067937 |
| Mg | 1.214073  | 3.420868  | 3.124646  |
| Mg | 1.683109  | 1.525028  | -4.605042 |
| Mg | 1.990774  | -1.922272 | -4.205947 |
| Mg | 2.082448  | -4.115266 | 1.056040  |
| Mg | 3.442335  | 3.066802  | -2.023212 |
| Mg | 3.471937  | 0.661022  | 3.145760  |
| Mg | 3.947526  | -2.504169 | -1.391010 |
| Mg | 4.843208  | 0.574565  | -0.043974 |

35  
Al15Mg20

|    |           |           |           |
|----|-----------|-----------|-----------|
| Al | -2.607696 | 0.660286  | 0.412865  |
| Al | -2.117312 | -1.358661 | -1.506488 |
| Al | -1.723889 | -1.900327 | 1.241897  |
| Al | -1.277155 | 1.291648  | -2.026606 |
| Al | -0.637087 | 0.413966  | 2.437913  |
| Al | -0.428664 | 2.385939  | 0.383685  |
| Al | -0.113178 | -0.240737 | -0.124042 |
| Al | 0.137097  | -2.852956 | -0.663653 |
| Al | 0.413916  | -0.885878 | -2.677561 |
| Al | 0.781640  | 2.732708  | 2.753727  |
| Al | 1.053809  | -1.766723 | 1.781807  |
| Al | 1.504128  | 1.430009  | -1.487748 |
| Al | 1.935524  | 0.818910  | 1.267695  |
| Al | 2.076944  | 3.347283  | 0.379037  |
| Al | 2.384386  | -1.135320 | -0.657601 |
| Mg | -4.751741 | -1.683530 | 0.270699  |
| Mg | -4.408252 | 0.748993  | -2.210498 |
| Mg | -3.614149 | -0.289160 | 3.271313  |
| Mg | -3.069678 | 3.625633  | -0.735967 |
| Mg | -2.676507 | -4.351946 | -0.556573 |
| Mg | -2.447916 | 2.993250  | 2.748119  |
| Mg | -2.114996 | -0.432370 | -4.563615 |
| Mg | -1.053892 | -3.581972 | -3.531507 |
| Mg | -0.828445 | -2.135722 | 4.312730  |
| Mg | -0.275044 | -4.650929 | 1.944291  |
| Mg | -0.142332 | 5.403433  | 1.320713  |
| Mg | 0.197302  | 4.248386  | -2.101527 |
| Mg | 0.636935  | 1.728069  | -4.522763 |

|    |          |           |           |
|----|----------|-----------|-----------|
| Mg | 1.863812 | 0.135328  | 4.360275  |
| Mg | 2.361744 | -3.399615 | -2.889922 |
| Mg | 2.850357 | -4.062341 | 0.503213  |
| Mg | 3.422701 | -0.118299 | -3.481154 |
| Mg | 3.948411 | 2.692138  | 2.850479  |
| Mg | 4.210197 | -1.199928 | 1.985980  |
| Mg | 4.509030 | 1.390434  | -0.489211 |

35

Al16Mg19

|    |           |           |           |
|----|-----------|-----------|-----------|
| Al | -1.723135 | 0.731242  | -2.470605 |
| Al | 1.085479  | 0.680013  | -2.327527 |
| Al | -0.425966 | -1.754022 | -2.220019 |
| Al | 3.625415  | 0.304784  | -1.256786 |
| Al | -0.378845 | 2.679538  | -0.938066 |
| Al | -2.750835 | -1.232892 | -0.721554 |
| Al | 1.716868  | -1.376960 | -0.537459 |
| Al | -0.484933 | 0.081708  | -0.193182 |
| Al | -2.737833 | 1.479782  | 0.053030  |
| Al | 1.774345  | 1.436013  | 0.350108  |
| Al | -0.595857 | -2.533351 | 0.533991  |
| Al | 3.367367  | -0.487867 | 1.430700  |
| Al | 1.943954  | -2.908842 | 1.604983  |
| Al | -0.581095 | 1.912037  | 1.805726  |
| Al | -2.058181 | -0.529974 | 1.920013  |
| Al | 0.735032  | -0.550342 | 2.118969  |
| Mg | -0.188580 | -0.364173 | -5.049193 |
| Mg | -0.157165 | 3.023966  | -4.070967 |
| Mg | -3.262873 | -1.667907 | -3.790269 |
| Mg | 2.635011  | -1.846341 | -3.493573 |
| Mg | -3.217077 | 3.482483  | -2.322484 |
| Mg | 2.714189  | 3.352294  | -1.976644 |
| Mg | -2.230861 | -4.267275 | -1.573495 |
| Mg | 1.296521  | -4.404414 | -1.215570 |
| Mg | 4.542127  | -2.748173 | -0.417104 |
| Mg | 4.772846  | 2.313004  | 0.892507  |
| Mg | -2.211678 | 4.499424  | 0.909661  |
| Mg | -5.175221 | -0.259963 | 1.010148  |
| Mg | 1.298168  | 4.430621  | 1.147192  |
| Mg | -3.482115 | -3.330862 | 1.588004  |
| Mg | -3.493830 | 2.049170  | 3.091592  |
| Mg | 2.274277  | 1.875136  | 3.442069  |
| Mg | -0.593383 | -2.969408 | 3.652787  |
| Mg | 2.739820  | -1.572813 | 4.352812  |
| Mg | -0.771957 | 0.474365  | 4.670208  |

35

Al17Mg18

|    |           |           |           |
|----|-----------|-----------|-----------|
| Al | -0.776592 | -0.965684 | -2.592519 |
| Al | 1.044899  | 0.943359  | -1.786576 |
| Al | 0.289870  | 3.496203  | -1.638026 |
| Al | -1.690009 | 1.494125  | -1.441449 |
| Al | 3.593548  | 0.251788  | -1.418976 |
| Al | 1.614301  | -1.750945 | -1.222433 |
| Al | -2.879405 | -0.953580 | -0.697910 |
| Al | -0.858820 | -2.937985 | -0.564032 |
| Al | 2.583787  | 2.613617  | -0.256910 |
| Al | -0.388696 | -0.393184 | 0.038656  |
| Al | 0.042890  | 2.174870  | 0.664652  |
| Al | 2.124237  | 0.130846  | 0.802606  |
| Al | -2.366319 | 0.988114  | 1.296569  |
| Al | 0.935897  | -2.254895 | 1.515422  |
| Al | -1.831492 | -1.742452 | 1.815746  |
| Al | 2.003163  | 2.206572  | 2.471674  |
| Al | 0.023588  | 0.204166  | 2.669094  |
| Mg | -0.487840 | 1.844994  | -4.356497 |
| Mg | 2.141800  | -0.737319 | -4.182133 |
| Mg | -3.547663 | 0.144020  | -3.629906 |
| Mg | 2.998545  | 2.825442  | -3.374645 |
| Mg | 0.444111  | -3.776130 | -3.365422 |
| Mg | -3.038777 | -3.282915 | -2.798537 |
| Mg | -4.761425 | 1.635601  | -0.660641 |
| Mg | 1.751481  | -4.760519 | -0.229090 |
| Mg | -2.348243 | 4.131439  | 0.194674  |
| Mg | 4.145587  | -2.245991 | 0.625003  |
| Mg | 1.166476  | 5.077116  | 1.106792  |

|    |           |           |          |
|----|-----------|-----------|----------|
| Mg | 4.971945  | 1.339889  | 1.359141 |
| Mg | -4.884950 | -1.014040 | 1.718319 |
| Mg | -1.049770 | -4.780284 | 1.972430 |
| Mg | -0.984429 | 3.104959  | 3.465758 |
| Mg | 2.879732  | -0.689994 | 3.721873 |
| Mg | -2.691296 | 0.077391  | 4.305083 |
| Mg | -0.170133 | -2.398595 | 4.472213 |

35  
Al18Mg17

|    |           |           |           |
|----|-----------|-----------|-----------|
| Al | -3.850426 | 0.432036  | -1.013480 |
| Al | -2.733951 | 2.537941  | 0.489136  |
| Al | -2.124032 | -0.093274 | 0.954461  |
| Al | -1.846822 | -1.498005 | -1.451022 |
| Al | -1.838119 | 1.604432  | 2.991934  |
| Al | -1.363743 | 1.258387  | -1.506102 |
| Al | -0.857493 | -2.544878 | 1.022056  |
| Al | -0.625848 | 3.755310  | -0.928233 |
| Al | -0.097645 | 1.995080  | 1.007438  |
| Al | 0.163492  | -0.332116 | 2.560307  |
| Al | 0.302914  | -0.385350 | -0.169120 |
| Al | 0.350771  | -0.395964 | -2.888457 |
| Al | 0.660490  | -2.743369 | -1.358980 |
| Al | 1.378766  | 1.825106  | -1.375349 |
| Al | 1.935762  | -2.018973 | 1.163034  |
| Al | 2.383504  | 0.789766  | 1.112197  |
| Al | 2.700103  | -0.659853 | -1.315891 |
| Al | 3.222395  | -3.216051 | -0.833604 |
| Mg | -4.903355 | 0.878249  | 2.063249  |
| Mg | -4.137061 | -2.450860 | 0.519470  |
| Mg | -3.504490 | 3.352471  | -2.460903 |
| Mg | -2.687812 | 0.009916  | -4.073603 |
| Mg | -2.546437 | -1.514462 | 3.705697  |
| Mg | -1.848095 | -4.637318 | -1.202104 |
| Mg | -1.182757 | 4.713078  | 2.162505  |
| Mg | -0.165951 | 2.707405  | -4.000374 |
| Mg | 0.574784  | -3.251288 | 3.756807  |
| Mg | 1.153733  | -5.082396 | 0.739515  |
| Mg | 1.238187  | 2.378956  | 3.807051  |
| Mg | 2.201979  | 4.088432  | 0.688903  |
| Mg | 2.511239  | -2.565101 | -3.901073 |
| Mg | 2.966376  | 0.995311  | -4.008951 |
| Mg | 3.058325  | -0.695882 | 3.826660  |
| Mg | 4.526393  | 1.913004  | -0.933568 |
| Mg | 4.984825  | -1.149742 | 0.850390  |

35  
Al19Mg16

|    |           |           |           |
|----|-----------|-----------|-----------|
| Al | -2.651350 | 0.961842  | -0.234265 |
| Al | -2.532864 | -1.837695 | 0.320365  |
| Al | -2.169839 | -0.900357 | -2.354041 |
| Al | -2.119705 | 2.471135  | 2.127457  |
| Al | -1.300318 | -0.076580 | 2.031749  |
| Al | -0.698147 | 1.552938  | -2.260685 |
| Al | -0.546879 | -2.969894 | -1.393259 |
| Al | -0.351670 | -0.501047 | -0.485101 |
| Al | -0.154650 | 1.995564  | 0.432968  |
| Al | 0.047652  | -2.479668 | 1.363439  |
| Al | 0.483203  | 1.803270  | 3.068078  |
| Al | 0.575823  | -0.965953 | 3.723062  |
| Al | 0.623338  | -0.882550 | -2.954267 |
| Al | 1.182137  | 3.470300  | -1.298218 |
| Al | 1.486962  | -0.097641 | 1.404713  |
| Al | 1.865255  | 0.881321  | -1.252531 |
| Al | 2.000837  | -1.888631 | -0.663052 |
| Al | 2.470581  | 2.404645  | 1.006160  |
| Al | 3.877675  | 0.033198  | 0.297388  |
| Mg | -5.108280 | -0.875354 | -1.177035 |
| Mg | -4.409102 | 0.114426  | 2.254544  |
| Mg | -3.735799 | 1.816064  | -3.071037 |
| Mg | -2.245122 | -2.644897 | 3.535586  |
| Mg | -2.075368 | 4.106585  | -0.802509 |
| Mg | -1.957461 | -4.892960 | 0.688266  |
| Mg | -1.850653 | 0.857497  | 4.973654  |
| Mg | -1.278034 | 0.283991  | -5.150933 |
| Mg | 0.379448  | 4.752654  | 1.751849  |



|    |          |           |           |
|----|----------|-----------|-----------|
| Mg | 1.552226 | -4.926776 | 0.059147  |
| Mg | 1.784375 | 1.988599  | -4.171074 |
| Mg | 1.872744 | -3.733842 | -3.285925 |
| Mg | 3.157193 | -2.565413 | 2.294826  |
| Mg | 3.499856 | 0.773868  | 3.599036  |
| Mg | 3.948378 | -0.770839 | -2.890085 |
| Mg | 4.377558 | 2.742201  | -1.488270 |

35  
Al20Mg15

|    |           |           |           |
|----|-----------|-----------|-----------|
| Al | -0.459086 | -0.351350 | -3.387254 |
| Al | 0.232140  | -3.029578 | -2.731326 |
| Al | 1.695093  | 1.467644  | -2.603907 |
| Al | -2.888104 | 0.455909  | -1.971931 |
| Al | 1.395329  | -1.020517 | -1.467369 |
| Al | 3.829770  | 0.008338  | -1.423063 |
| Al | -1.365694 | -1.669403 | -1.084969 |
| Al | -0.430199 | 0.961706  | -1.050114 |
| Al | 0.602135  | 3.403098  | -0.702638 |
| Al | -2.222270 | 2.751070  | -0.276760 |
| Al | 0.693286  | -3.191691 | 0.068016  |
| Al | 2.069989  | 1.231723  | 0.164420  |
| Al | -2.387359 | 0.150543  | 0.728025  |
| Al | 2.836156  | -1.382189 | 0.847263  |
| Al | 0.241944  | -0.714388 | 0.993407  |
| Al | -0.224485 | 1.976793  | 1.514614  |
| Al | -1.742844 | -2.414409 | 1.538993  |
| Al | -2.705085 | 2.150139  | 2.446186  |
| Al | 1.749278  | 0.534204  | 2.808902  |
| Al | -1.109034 | -0.058852 | 3.186012  |
| Mg | 2.512364  | -1.091948 | -4.373505 |
| Mg | -2.857093 | -2.353662 | -3.740247 |
| Mg | -1.179687 | 2.867001  | -3.413283 |
| Mg | 3.435692  | -3.309366 | -1.763285 |
| Mg | 3.867719  | 3.325068  | -1.294708 |
| Mg | -1.894797 | -4.733979 | -0.830502 |
| Mg | -4.407367 | -2.001645 | -0.369568 |
| Mg | -5.105261 | 1.600936  | 0.216752  |
| Mg | 3.180835  | -4.421289 | 1.519915  |
| Mg | 4.818789  | 0.935191  | 1.610946  |
| Mg | -1.122318 | 4.963964  | 1.665254  |
| Mg | 2.347283  | 3.701789  | 2.086842  |
| Mg | -4.166724 | -0.768658 | 3.120233  |
| Mg | 0.936387  | -2.572135 | 3.397330  |
| Mg | -0.176782 | 2.599942  | 4.571317  |

35  
Al21Mg14

|    |           |           |           |
|----|-----------|-----------|-----------|
| Al | 2.568731  | -1.650452 | -3.247508 |
| Al | 1.023038  | 0.753028  | -3.033950 |
| Al | -0.061056 | -1.910162 | -2.662996 |
| Al | -0.900484 | 2.679583  | -1.776863 |
| Al | 1.803769  | -3.443360 | -1.228475 |
| Al | -2.605320 | -1.707751 | -1.219568 |
| Al | -0.666746 | 0.120037  | -1.032933 |
| Al | 1.908421  | -0.793245 | -0.894857 |
| Al | -3.122185 | 1.130135  | -0.662954 |
| Al | 1.461195  | 1.866639  | -0.505249 |
| Al | -0.265777 | -2.376648 | 0.109453  |
| Al | 0.375403  | 4.172478  | 0.266243  |
| Al | -1.039347 | 2.025532  | 0.892159  |
| Al | 3.255261  | 0.501616  | 1.103465  |
| Al | -2.077956 | -0.625464 | 1.261612  |
| Al | 0.640352  | -0.061237 | 1.384708  |
| Al | 2.214204  | -2.222429 | 1.413231  |
| Al | -3.332385 | 1.565816  | 2.128648  |
| Al | 1.324576  | 2.376537  | 2.253818  |
| Al | -0.331913 | -2.055024 | 2.854806  |
| Al | -0.904027 | 0.821093  | 3.369532  |
| Mg | 0.578463  | -1.016283 | -5.619284 |
| Mg | -2.206431 | 0.382399  | -3.733229 |
| Mg | 1.787766  | 3.973761  | -2.769813 |
| Mg | 4.113037  | 1.085745  | -2.108561 |
| Mg | -1.218542 | -4.683783 | -1.779044 |
| Mg | 4.700169  | -2.106068 | -0.619353 |
| Mg | -3.016121 | 4.270960  | 0.080314  |

|    |           |           |          |
|----|-----------|-----------|----------|
| Mg | 3.656122  | 3.752784  | 0.639744 |
| Mg | -5.145478 | -0.836072 | 0.726680 |
| Mg | -2.816012 | -3.678829 | 1.419210 |
| Mg | 0.695704  | -4.963836 | 1.543598 |
| Mg | -1.267996 | 4.030101  | 3.244844 |
| Mg | 2.137465  | -0.260096 | 4.100988 |
| Mg | -3.265900 | -1.117508 | 4.101584 |

35  
Al22Mg13

|    |           |           |           |
|----|-----------|-----------|-----------|
| Al | -3.431770 | -1.911250 | 1.491915  |
| Al | -3.054971 | 0.909937  | 1.534648  |
| Al | -2.960928 | -0.169716 | -3.078681 |
| Al | -2.762930 | 1.955735  | -1.224411 |
| Al | -2.287845 | -0.699305 | -0.557082 |
| Al | -1.208522 | -3.111348 | 0.199628  |
| Al | -0.996201 | -0.955907 | 1.991432  |
| Al | -0.922700 | -2.062337 | -2.545155 |
| Al | -0.693554 | 1.326797  | 0.367983  |
| Al | -0.619934 | 1.592539  | 3.031617  |
| Al | -0.562239 | 0.666729  | -2.302855 |
| Al | -0.065388 | 3.240919  | -1.417431 |
| Al | 0.428557  | -1.098975 | -0.412501 |
| Al | 1.254348  | 2.986669  | 1.211145  |
| Al | 1.336531  | -2.488488 | 1.693514  |
| Al | 1.412078  | 0.293498  | 1.748218  |
| Al | 1.475123  | 1.954285  | -3.417106 |
| Al | 1.740988  | -0.790929 | -2.753836 |
| Al | 1.784145  | 1.250231  | -0.869954 |
| Al | 3.110915  | -1.084984 | -0.158641 |
| Al | 3.573891  | -0.910421 | 2.506585  |
| Al | 3.727435  | 1.417111  | 0.953395  |
| Mg | -5.294896 | 0.031738  | -0.618754 |
| Mg | -3.845967 | -3.133669 | -1.667212 |
| Mg | -2.883167 | -0.391492 | 4.400805  |
| Mg | -1.914638 | 4.034360  | 1.218948  |
| Mg | -1.737340 | 2.840377  | -4.159158 |
| Mg | -1.285255 | -3.775223 | 3.272144  |
| Mg | -0.306940 | -0.341289 | -5.215027 |
| Mg | 0.919945  | -1.010157 | 4.552887  |
| Mg | 1.619242  | -3.797935 | -1.369821 |
| Mg | 2.664206  | 2.063860  | 3.952186  |
| Mg | 3.080548  | 4.026534  | -1.234611 |
| Mg | 4.209024  | -3.714358 | 1.192536  |
| Mg | 4.498208  | 0.856462  | -2.317351 |

35  
Al23Mg12

|    |           |           |           |
|----|-----------|-----------|-----------|
| Al | -1.336753 | -0.795090 | -3.896526 |
| Al | -0.556477 | 1.793936  | -3.011247 |
| Al | 3.358435  | -0.905662 | -2.440938 |
| Al | 0.742561  | -0.536787 | -2.281457 |
| Al | 2.319154  | 1.727540  | -2.138109 |
| Al | -0.971370 | -2.680496 | -1.740438 |
| Al | -1.896887 | -0.023676 | -1.419991 |
| Al | 1.771855  | -2.737025 | -0.871095 |
| Al | -2.213258 | 2.604246  | -0.660612 |
| Al | 0.235856  | 1.516293  | -0.460583 |
| Al | 2.448338  | -0.122454 | -0.075794 |
| Al | -4.081110 | 0.410190  | 0.045770  |
| Al | -0.053599 | -1.072551 | 0.263585  |
| Al | -2.607751 | -1.951106 | 0.469374  |
| Al | 2.404514  | 2.501573  | 0.726028  |
| Al | -0.311953 | -3.583717 | 0.923244  |
| Al | -1.742260 | 0.751602  | 1.312140  |
| Al | -0.365918 | 3.091177  | 1.610621  |
| Al | 1.861131  | -1.994464 | 1.908141  |
| Al | 0.854263  | 0.673579  | 2.191473  |
| Al | 3.490453  | 0.366869  | 2.289677  |
| Al | -3.526453 | -0.630055 | 2.617886  |
| Al | -0.853532 | -1.489382 | 2.800882  |
| Mg | 1.611665  | 0.503061  | -5.049185 |
| Mg | 1.251122  | -3.023828 | -4.051849 |
| Mg | -3.789178 | 1.534833  | -3.271085 |
| Mg | -4.085917 | -2.010969 | -2.371031 |
| Mg | 0.540634  | 4.443918  | -1.298749 |

|    |           |           |           |
|----|-----------|-----------|-----------|
| Mg | 5.127951  | 1.326209  | -0.568180 |
| Mg | 4.699842  | -2.197871 | 0.391063  |
| Mg | -3.800741 | 2.873975  | 2.140121  |
| Mg | -2.894571 | -3.869209 | 2.921886  |
| Mg | 2.105741  | 2.998657  | 3.822966  |
| Mg | -1.401642 | 1.318471  | 4.357836  |
| Mg | 1.665855  | -0.811791 | 4.814175  |

35  
Al24mg11

|    |           |           |           |
|----|-----------|-----------|-----------|
| Al | 0.352450  | -1.567647 | -2.951020 |
| Al | -2.239216 | 0.016751  | -2.648272 |
| Al | 2.855721  | -2.572283 | -2.200795 |
| Al | 2.500544  | 0.147012  | -2.093634 |
| Al | -1.498831 | 2.701664  | -1.575461 |
| Al | 0.251965  | -3.886306 | -1.410928 |
| Al | 1.534823  | 2.720797  | -1.237648 |
| Al | -0.027840 | 0.494238  | -1.217813 |
| Al | -4.008433 | -1.293482 | -0.887967 |
| Al | -1.412107 | -1.846836 | -0.767762 |
| Al | 4.044631  | 1.740010  | -0.477960 |
| Al | 1.297821  | -1.735840 | -0.302808 |
| Al | -2.459276 | 0.660278  | 0.044708  |
| Al | 3.875789  | -1.109491 | 0.102163  |
| Al | 1.966798  | 0.690315  | 0.666525  |
| Al | -0.277164 | 2.269029  | 0.876828  |
| Al | -2.779454 | 3.163269  | 0.892919  |
| Al | -0.268598 | -3.172160 | 1.394224  |
| Al | 2.207010  | 3.203883  | 1.421863  |
| Al | -0.382500 | -0.465498 | 1.428883  |
| Al | -2.787933 | -1.595925 | 1.633382  |
| Al | 1.979358  | -1.482475 | 2.344437  |
| Al | -2.023825 | 1.174935  | 2.740614  |
| Al | 0.931599  | 1.180194  | 3.133292  |
| Mg | 0.321546  | 1.552800  | -4.108523 |
| Mg | -2.443411 | -3.127991 | -3.377518 |
| Mg | 5.501147  | -0.516918 | -2.502045 |
| Mg | -4.645011 | 1.963246  | -1.707693 |
| Mg | -0.144399 | 5.209527  | -0.046064 |
| Mg | -2.905581 | -4.417313 | 0.019948  |
| Mg | 2.816161  | -4.224459 | 0.692191  |
| Mg | -5.054564 | 0.712016  | 1.706268  |
| Mg | 4.231619  | 0.908770  | 2.742942  |
| Mg | -0.580077 | 4.015954  | 3.389763  |
| Mg | -0.730761 | -1.510066 | 4.282962  |

35  
Al25Mg10

|    |           |           |           |
|----|-----------|-----------|-----------|
| Al | 0.205103  | -2.115065 | -4.190435 |
| Al | -1.068990 | 0.232508  | -3.465589 |
| Al | 1.802273  | -0.128676 | -3.099776 |
| Al | -2.389755 | -2.150317 | -2.817637 |
| Al | 2.294585  | -2.753743 | -2.243575 |
| Al | -0.057272 | -1.699658 | -1.661040 |
| Al | -1.992177 | 2.477735  | -1.583531 |
| Al | 0.219220  | 1.014835  | -1.234335 |
| Al | 2.781039  | 1.858659  | -1.009074 |
| Al | -2.270733 | -0.208029 | -0.952526 |
| Al | 2.226586  | -0.789086 | -0.400979 |
| Al | 0.421714  | 3.468169  | -0.107508 |
| Al | -1.891086 | -2.823274 | 0.073576  |
| Al | -3.925279 | 1.473807  | 0.246829  |
| Al | 0.956447  | -3.194607 | 0.419992  |
| Al | -0.256402 | -0.777796 | 0.811316  |
| Al | -1.392523 | 1.678194  | 0.987953  |
| Al | 1.355293  | 1.298229  | 1.229051  |
| Al | 3.856698  | 0.450960  | 1.353885  |
| Al | -2.761412 | -0.664937 | 1.789067  |
| Al | 1.907103  | -1.294254 | 2.356235  |
| Al | -0.693257 | -2.501470 | 2.693378  |
| Al | 0.095112  | 3.017182  | 2.795912  |
| Al | -0.443858 | 0.309969  | 3.269688  |
| Al | 2.165697  | 1.112350  | 3.686038  |
| Mg | 0.770311  | 3.047547  | -3.438556 |
| Mg | -4.246037 | 0.722609  | -3.120633 |
| Mg | -0.386542 | -4.724432 | -2.185759 |

|    |           |           |           |
|----|-----------|-----------|-----------|
| Mg | 4.831712  | -0.445571 | -1.983035 |
| Mg | -4.884809 | -1.744032 | -0.420793 |
| Mg | 4.160223  | -2.916388 | 0.703615  |
| Mg | -2.458420 | 4.550247  | 0.882091  |
| Mg | 3.190371  | 3.693324  | 1.758027  |
| Mg | -3.130694 | 2.051140  | 3.517485  |
| Mg | 1.009760  | -1.526128 | 5.340643  |

35  
AL26Mg9

|    |           |           |           |
|----|-----------|-----------|-----------|
| Al | -1.110006 | 2.122878  | -3.453518 |
| Al | 0.384730  | -2.648253 | -3.117462 |
| Al | 1.552848  | 2.063826  | -2.457123 |
| Al | -0.156370 | -0.107895 | -2.386075 |
| Al | 2.531645  | -0.812526 | -2.302674 |
| Al | -2.821374 | 0.595963  | -1.710972 |
| Al | -1.917596 | -2.182170 | -1.598927 |
| Al | -0.692206 | 2.225879  | -0.847551 |
| Al | -0.367366 | -4.319093 | -0.798540 |
| Al | 0.799295  | -2.012155 | -0.582683 |
| Al | 1.527094  | 0.585794  | -0.240368 |
| Al | -1.106010 | -0.307679 | 0.142648  |
| Al | 1.639950  | 3.231737  | 0.404351  |
| Al | -3.535244 | -1.101053 | 0.538784  |
| Al | 3.158115  | -1.388611 | 0.608897  |
| Al | -2.792099 | 1.678227  | 1.024248  |
| Al | -1.007046 | 3.971508  | 1.242849  |
| Al | -1.286564 | -2.747645 | 1.280085  |
| Al | 1.377743  | -3.593052 | 1.459412  |
| Al | -0.077255 | 1.519309  | 1.698367  |
| Al | 0.812025  | -1.023408 | 2.025109  |
| Al | 2.593671  | 1.159455  | 2.212227  |
| Al | -1.865943 | -0.323779 | 2.799006  |
| Al | 1.018694  | 3.335216  | 3.181904  |
| Al | -1.662880 | 2.424441  | 3.545425  |
| Al | 0.515998  | 0.680271  | 4.151358  |
| Mg | 1.245866  | 0.182754  | -5.094863 |
| Mg | -2.240756 | -0.906956 | -4.525287 |
| Mg | 0.189840  | 4.968582  | -1.894476 |
| Mg | 2.937625  | -4.020337 | -1.456551 |
| Mg | -3.297513 | 3.786965  | -1.349001 |
| Mg | 4.378517  | 1.529860  | -0.631266 |
| Mg | -3.608635 | -4.333231 | -0.085412 |
| Mg | 3.201354  | -1.555316 | 3.856489  |
| Mg | -0.320144 | -2.679508 | 4.361589  |

35  
AL27Mg8

|    |           |           |           |
|----|-----------|-----------|-----------|
| Al | 0.812620  | 1.554175  | -4.062105 |
| Al | 0.833737  | -1.637727 | -3.709892 |
| Al | -1.741744 | -2.822062 | -3.187983 |
| Al | -1.355537 | 0.012360  | -3.129219 |
| Al | 0.577262  | -4.084821 | -2.168508 |
| Al | -0.541045 | 2.598807  | -1.941631 |
| Al | 2.343583  | 2.708850  | -1.849839 |
| Al | 1.178893  | 0.302013  | -1.829942 |
| Al | 2.447004  | -2.125058 | -1.343494 |
| Al | -0.313973 | -1.824227 | -1.265641 |
| Al | -3.027247 | -1.420665 | -1.090682 |
| Al | -1.776161 | -3.914784 | -0.512671 |
| Al | -1.238582 | 0.513987  | -0.432799 |
| Al | 0.630261  | 4.378295  | -0.227976 |
| Al | 3.361784  | 0.511754  | -0.185031 |
| Al | 1.045254  | 1.889719  | 0.361884  |
| Al | 0.802002  | -3.502226 | 0.608918  |
| Al | 1.171833  | -0.810360 | 0.716815  |
| Al | -1.542169 | 2.937110  | 0.764275  |
| Al | -1.389428 | -1.797202 | 1.222084  |
| Al | -3.207473 | 0.299002  | 1.381382  |
| Al | -0.619919 | 0.703059  | 2.152757  |
| Al | 2.201551  | 0.792511  | 2.635887  |
| Al | 0.519636  | 3.076611  | 2.706059  |
| Al | 0.629807  | -1.617424 | 3.206897  |
| Al | -2.013877 | -0.930705 | 3.708005  |
| Al | 0.247975  | 0.751840  | 4.576204  |
| Mg | 0.841421  | 4.868188  | -3.542171 |

|    |           |           |           |
|----|-----------|-----------|-----------|
| Mg | 3.745710  | 0.069188  | -3.473170 |
| Mg | -3.745083 | 1.821615  | -1.583345 |
| Mg | 3.501936  | 3.511443  | 1.224739  |
| Mg | -4.281558 | -2.752651 | 1.571646  |
| Mg | 3.656214  | -2.172297 | 1.819465  |
| Mg | -1.209704 | -4.276787 | 3.011436  |
| Mg | -2.544983 | 2.388472  | 3.867647  |

35

Al28Mg7

|    |           |           |           |
|----|-----------|-----------|-----------|
| Al | 1.707531  | -1.358609 | -3.990798 |
| Al | -0.881390 | -1.968662 | -3.415665 |
| Al | 0.112230  | 0.820129  | -3.162620 |
| Al | 1.027655  | -3.651149 | -2.442583 |
| Al | 2.714209  | 0.632798  | -2.330964 |
| Al | 3.323553  | -2.234613 | -1.953739 |
| Al | -1.715195 | 2.342426  | -1.698595 |
| Al | 0.891745  | -1.154800 | -1.425558 |
| Al | -1.618498 | -0.395160 | -1.400480 |
| Al | -4.030385 | 0.615410  | -0.941140 |
| Al | -1.003460 | -2.963021 | -0.614478 |
| Al | 0.703492  | 1.356908  | -0.285514 |
| Al | 3.403109  | 2.001672  | -0.111858 |
| Al | -3.659428 | 3.042768  | 0.211748  |
| Al | 2.927737  | -0.650007 | 0.214885  |
| Al | 1.587951  | -3.170818 | 0.244983  |
| Al | -0.968385 | 3.666397  | 0.599262  |
| Al | -1.848471 | 1.107545  | 0.741635  |
| Al | -2.840448 | -1.451858 | 0.828510  |
| Al | 0.061115  | -0.826165 | 1.192530  |
| Al | 1.642320  | 3.448574  | 1.245322  |
| Al | -4.332814 | 0.744170  | 1.756105  |
| Al | 2.302738  | 0.910776  | 2.241213  |
| Al | 2.241380  | -1.888616 | 2.533357  |
| Al | -0.116975 | 1.911729  | 2.624103  |
| Al | -2.704913 | 2.698306  | 2.758903  |
| Al | -2.075628 | -0.153337 | 3.117501  |
| Al | 0.486594  | -0.424788 | 3.898616  |
| Mg | -2.972932 | 0.524486  | -4.071087 |
| Mg | 1.278035  | 3.759763  | -2.074928 |
| Mg | -3.855662 | -2.490353 | -2.063922 |
| Mg | 5.628616  | -0.060759 | -1.289019 |
| Mg | 4.703857  | -3.171356 | 0.826414  |
| Mg | -0.808733 | -3.324239 | 2.711026  |
| Mg | -1.310551 | 1.754452  | 5.526832  |

35

Al29Mg6

|    |           |           |           |
|----|-----------|-----------|-----------|
| Al | 2.575614  | -1.480260 | -3.692192 |
| Al | 0.138290  | -0.148169 | -3.320020 |
| Al | 0.314013  | -2.832625 | -2.725205 |
| Al | 2.829713  | 1.037068  | -2.664123 |
| Al | -1.809499 | 1.521704  | -2.138404 |
| Al | 3.022673  | -3.337121 | -1.724781 |
| Al | 4.342271  | -0.937839 | -1.531259 |
| Al | 1.656467  | -1.088274 | -1.186429 |
| Al | 0.686234  | 1.322900  | -1.104745 |
| Al | -1.586268 | -3.713980 | -1.040350 |
| Al | 2.462885  | 3.246841  | -0.907986 |
| Al | -1.082501 | -1.033054 | -0.755017 |
| Al | -0.345645 | 3.758250  | -0.649408 |
| Al | -3.611212 | 0.476384  | -0.375816 |
| Al | -3.032574 | 3.222061  | -0.270649 |
| Al | 0.925022  | -3.392345 | -0.003396 |
| Al | -3.455670 | -2.181610 | 0.088404  |
| Al | 3.042466  | 0.783451  | 0.296479  |
| Al | -1.267075 | 1.403530  | 0.590691  |
| Al | 3.223805  | -1.927469 | 0.831324  |
| Al | 0.602956  | -0.516278 | 1.307884  |
| Al | 1.162385  | 2.459632  | 1.427415  |
| Al | -1.165477 | -2.878236 | 1.574360  |
| Al | -1.311531 | 3.748651  | 1.918431  |
| Al | -2.373244 | -0.567806 | 1.986248  |
| Al | -3.383000 | 1.957926  | 2.161185  |
| Al | 1.410611  | -2.788368 | 2.618127  |
| Al | -0.646837 | 1.372416  | 3.209115  |

|    |           |           |           |
|----|-----------|-----------|-----------|
| Al | -0.446186 | -1.261559 | 3.767065  |
| Mg | 0.580271  | 3.114187  | -3.696360 |
| Mg | -2.904498 | -1.469081 | -3.161430 |
| Mg | 5.465024  | 2.079749  | -1.242891 |
| Mg | -5.513578 | -0.482286 | 1.968657  |
| Mg | 2.570784  | 0.238967  | 3.519154  |
| Mg | -3.076689 | 0.292642  | 4.925922  |

35  
Al30Mg5

|    |           |           |           |
|----|-----------|-----------|-----------|
| Al | -1.263652 | 0.019760  | -3.905029 |
| Al | 0.024533  | -2.300047 | -3.625725 |
| Al | -0.236930 | 2.308472  | -2.883544 |
| Al | 2.030541  | -2.559631 | -1.933932 |
| Al | -1.893329 | -1.742275 | -1.816670 |
| Al | 0.382998  | -0.249896 | -1.687711 |
| Al | -2.457949 | 0.899423  | -1.632525 |
| Al | -0.354979 | -4.112077 | -1.564905 |
| Al | 2.086740  | 2.150580  | -1.336470 |
| Al | -2.217452 | 3.617566  | -1.296030 |
| Al | 3.213470  | -0.212594 | -1.282309 |
| Al | 0.422900  | 4.353621  | -1.104495 |
| Al | -0.404059 | 1.901492  | -0.212152 |
| Al | 1.976199  | -4.466299 | 0.021670  |
| Al | 0.304229  | -2.266688 | 0.228250  |
| Al | -2.379577 | -3.266643 | 0.254717  |
| Al | 3.134799  | -2.069002 | 0.582606  |
| Al | -1.507683 | -0.426900 | 0.786779  |
| Al | -2.904829 | 1.995258  | 0.897349  |
| Al | 1.334812  | 0.158985  | 0.900246  |
| Al | 3.691772  | 1.257000  | 1.021234  |
| Al | 1.585705  | 3.166693  | 1.152095  |
| Al | -1.109528 | 4.136200  | 1.169304  |
| Al | -0.377687 | -4.799645 | 1.200471  |
| Al | -0.603787 | 1.765728  | 2.478557  |
| Al | 1.460656  | -3.103815 | 2.516305  |
| Al | -1.295359 | -2.637588 | 2.576661  |
| Al | 3.059941  | -0.821050 | 2.904012  |
| Al | 0.321420  | -0.665514 | 3.263232  |
| Al | 2.009766  | 1.581414  | 3.275479  |
| Mg | 2.025100  | 0.286317  | -4.244840 |
| Mg | -3.114648 | 2.636300  | -4.207892 |
| Mg | -4.512810 | -0.843902 | 0.058931  |
| Mg | -2.968072 | -0.057522 | 3.539487  |
| Mg | 0.536748  | 4.366280  | 3.906845  |

35  
Al31mg4

|    |           |           |           |
|----|-----------|-----------|-----------|
| Al | -0.434761 | -0.750842 | -4.850586 |
| Al | 1.952829  | -1.871079 | -4.091846 |
| Al | -0.526067 | -3.224066 | -3.696967 |
| Al | 1.598509  | 0.865487  | -3.505881 |
| Al | -1.186994 | 1.126246  | -3.053605 |
| Al | -2.430929 | -1.407050 | -2.766202 |
| Al | 0.620077  | 3.118553  | -2.384862 |
| Al | 0.180728  | -1.046312 | -2.249528 |
| Al | 1.534164  | -3.534311 | -1.950883 |
| Al | 2.902180  | -0.762204 | -1.712138 |
| Al | -3.539212 | 0.773637  | -1.634536 |
| Al | -1.698105 | 2.694588  | -0.994896 |
| Al | -1.163033 | -3.103131 | -0.955805 |
| Al | 0.879700  | 1.075450  | -0.610016 |
| Al | -1.472557 | -0.258702 | -0.188527 |
| Al | 1.123975  | -1.813139 | 0.044970  |
| Al | 0.651123  | 3.840881  | 0.222315  |
| Al | 0.757911  | -4.338591 | 0.653679  |
| Al | -3.468278 | 1.517994  | 0.957313  |
| Al | 3.048719  | -0.168940 | 1.040471  |
| Al | -0.885677 | 2.011449  | 1.407351  |
| Al | -1.017921 | -2.508637 | 1.752384  |
| Al | 0.426729  | -0.172063 | 1.905606  |
| Al | 1.895201  | 2.147667  | 1.997948  |
| Al | 1.769243  | -2.506560 | 2.574929  |
| Al | -2.192523 | -0.162016 | 2.710715  |
| Al | 0.014680  | 3.892131  | 3.015440  |
| Al | -2.464555 | 2.480340  | 3.461218  |

|    |           |           |           |
|----|-----------|-----------|-----------|
| Al | 2.329709  | -0.050520 | 3.752591  |
| Al | -0.046987 | 1.383041  | 4.084445  |
| Al | -0.149349 | -1.394675 | 4.209963  |
| Mg | 3.565882  | 2.454144  | -0.966659 |
| Mg | 3.914597  | -3.232410 | 0.235643  |
| Mg | -3.995301 | -1.859704 | 0.375371  |
| Mg | -2.493706 | 4.783345  | 1.210584  |

|         |           |           |           |
|---------|-----------|-----------|-----------|
| 35      |           |           |           |
| Al32Mg3 |           |           |           |
| Al      | -3.533407 | 0.274070  | 1.384063  |
| Al      | -3.531843 | 0.728776  | -1.374993 |
| Al      | -2.898937 | -1.083756 | 3.671320  |
| Al      | -2.471924 | -1.537265 | -0.263438 |
| Al      | -2.217827 | -3.160416 | 1.877659  |
| Al      | -1.749769 | 1.531396  | 2.968355  |
| Al      | -1.545401 | 2.339524  | -2.377541 |
| Al      | -1.269810 | -0.361503 | -2.476540 |
| Al      | -1.244480 | 1.099927  | 0.054484  |
| Al      | -0.960712 | -3.812298 | -0.543088 |
| Al      | -0.849842 | -0.828603 | 2.007526  |
| Al      | -0.643180 | -2.692859 | 4.058764  |
| Al      | -0.544178 | -0.101679 | 4.739754  |
| Al      | -0.099823 | 3.167665  | 1.717436  |
| Al      | 0.248779  | -2.655686 | -2.810682 |
| Al      | 0.279033  | -1.396188 | -0.415508 |
| Al      | 0.319103  | 3.487735  | -0.862759 |
| Al      | 0.610856  | -3.202944 | 1.682118  |
| Al      | 0.889866  | 2.545671  | -3.650187 |
| Al      | 0.982120  | -0.275133 | -4.005013 |
| Al      | 1.030656  | 0.963474  | -1.560012 |
| Al      | 1.160934  | 1.670152  | 3.586071  |
| Al      | 1.183211  | 0.697893  | 1.116971  |
| Al      | 1.592562  | -1.099733 | 3.293687  |
| Al      | 1.790193  | -3.677869 | -0.760600 |
| Al      | 2.521710  | 2.984374  | 0.998529  |
| Al      | 2.591464  | -1.343866 | -1.984920 |
| Al      | 2.780472  | -1.574773 | 0.824673  |
| Al      | 2.831449  | 3.147117  | -1.714932 |
| Al      | 3.236507  | 1.010038  | -3.256378 |
| Al      | 3.522907  | 0.719595  | 2.368766  |
| Al      | 3.563485  | 0.796917  | -0.435254 |
| Mg      | -3.067534 | 3.515642  | 0.418767  |
| Mg      | -2.940201 | -2.988991 | -3.001710 |
| Mg      | -1.566437 | 1.113597  | -5.275386 |

|         |           |           |           |
|---------|-----------|-----------|-----------|
| 35      |           |           |           |
| Al33Mg2 |           |           |           |
| Al      | -0.049265 | -0.793579 | -4.382076 |
| Al      | 2.377636  | 0.058541  | -3.245598 |
| Al      | 1.714008  | -2.671291 | -3.124378 |
| Al      | -1.075672 | -2.975921 | -2.934643 |
| Al      | -0.139039 | 1.583338  | -2.837110 |
| Al      | -2.248696 | -0.262425 | -2.638831 |
| Al      | 2.415260  | 2.772946  | -2.512353 |
| Al      | -3.655981 | -2.617688 | -2.021780 |
| Al      | 0.266595  | -0.936077 | -1.771065 |
| Al      | 4.178424  | 0.895294  | -1.254486 |
| Al      | -1.907113 | -4.479846 | -0.774336 |
| Al      | 1.591727  | 0.981796  | -0.765646 |
| Al      | 2.773722  | -1.518464 | -0.759351 |
| Al      | 0.274693  | 3.389535  | -0.724510 |
| Al      | 0.666169  | -3.366351 | -0.559687 |
| Al      | -3.903356 | -0.337225 | -0.391596 |
| Al      | -1.686459 | -1.838095 | -0.379666 |
| Al      | -1.226925 | 0.889911  | -0.080535 |
| Al      | 3.070729  | 3.025043  | 0.211261  |
| Al      | -3.780326 | -3.089002 | 0.688561  |
| Al      | 0.462176  | -0.908761 | 1.124412  |
| Al      | 3.189313  | 0.285585  | 1.354820  |
| Al      | -3.348249 | 1.536884  | 1.481205  |
| Al      | 0.839013  | 1.817209  | 1.536454  |
| Al      | -1.348627 | 3.360418  | 1.546572  |
| Al      | -1.009583 | -3.418448 | 1.672577  |
| Al      | 1.236429  | 4.463297  | 1.690038  |
| Al      | -2.562780 | -1.051323 | 2.023170  |

|    |           |           |           |
|----|-----------|-----------|-----------|
| Al | 2.985113  | 2.601077  | 2.937569  |
| Al | -1.173698 | 0.959315  | 3.077083  |
| Al | -0.375616 | -1.628527 | 3.601875  |
| Al | 1.544929  | 0.279114  | 3.610882  |
| Al | 0.430838  | 3.006409  | 3.883655  |
| Mg | -2.966996 | 2.873555  | -1.570424 |
| Mg | 2.441606  | -2.886243 | 2.287937  |

35

Al34Mg1

|    |           |           |           |
|----|-----------|-----------|-----------|
| Al | 1.499578  | 0.154089  | -4.097687 |
| Al | -2.979219 | -0.843380 | -3.824455 |
| Al | -0.957434 | 1.045420  | -3.579798 |
| Al | -0.348382 | -1.655785 | -3.458420 |
| Al | 3.519548  | 0.678436  | -2.561455 |
| Al | -3.541739 | 1.361005  | -2.524419 |
| Al | 1.276788  | 2.463187  | -2.496499 |
| Al | -2.568266 | -2.956494 | -2.330571 |
| Al | 2.256607  | -1.882164 | -2.301475 |
| Al | -1.355465 | 2.657864  | -1.488790 |
| Al | -1.666254 | -0.435624 | -1.336687 |
| Al | -0.057599 | -3.098559 | -1.230329 |
| Al | 0.995017  | 0.170993  | -1.184620 |
| Al | -4.184284 | -0.991358 | -1.068576 |
| Al | 3.095939  | 2.090311  | -0.332612 |
| Al | 3.698748  | -0.582915 | -0.212547 |
| Al | -3.514809 | 1.657284  | 0.103094  |
| Al | 0.762701  | 3.264786  | 0.182146  |
| Al | -2.467687 | -2.987453 | 0.311616  |
| Al | 2.083770  | -2.594727 | 0.445251  |
| Al | -0.883027 | 1.198289  | 0.731678  |
| Al | -0.298716 | -1.393796 | 0.848074  |
| Al | -1.835335 | 3.737785  | 1.032203  |
| Al | -0.077169 | -4.060579 | 1.382293  |
| Al | -2.939053 | -0.596376 | 1.475348  |
| Al | 1.666303  | 0.443885  | 1.518949  |
| Al | 4.364382  | 1.068816  | 1.888188  |
| Al | 2.570662  | 2.995333  | 2.213778  |
| Al | 3.562649  | -1.404733 | 2.411423  |
| Al | -2.661094 | 1.823264  | 2.769198  |
| Al | 0.012305  | 2.624766  | 2.859052  |
| Al | -1.676590 | -2.543793 | 2.965234  |
| Al | 1.080218  | -2.112196 | 3.071734  |
| Al | -0.671644 | -0.004926 | 3.263456  |
| Mg | 2.238551  | 0.709343  | 4.556225  |

35

Al35Mg0

|    |           |           |           |
|----|-----------|-----------|-----------|
| Al | -4.051862 | -1.343601 | 0.268331  |
| Al | -3.591031 | 1.187142  | -0.946061 |
| Al | -3.346488 | -1.228866 | -2.354842 |
| Al | -3.170139 | 3.157356  | 0.767063  |
| Al | -2.738715 | 0.623745  | 1.742128  |
| Al | -2.129517 | -3.179756 | -0.743942 |
| Al | -1.981523 | 3.552958  | -1.792379 |
| Al | -1.861784 | -1.996498 | 1.863386  |
| Al | -1.648608 | 0.899499  | -2.809674 |
| Al | -1.545768 | -0.534854 | -0.380402 |
| Al | -1.126429 | 2.562833  | 2.609531  |
| Al | -1.059199 | 4.710239  | 0.843937  |
| Al | -0.773199 | -0.089300 | 3.661089  |
| Al | -0.698775 | -1.938862 | -2.678374 |
| Al | -0.698562 | 2.067750  | -0.109496 |
| Al | -0.657407 | -4.351269 | 1.114629  |
| Al | 0.525703  | -0.020213 | -4.240012 |
| Al | 0.545440  | 2.478231  | -2.959871 |
| Al | 0.567005  | -2.497740 | 2.843978  |
| Al | 0.600993  | -4.164186 | -1.435314 |
| Al | 0.614683  | 0.272221  | 1.437521  |
| Al | 0.663988  | 4.354087  | -1.099543 |
| Al | 0.686956  | -2.072905 | 0.082277  |
| Al | 0.743667  | 0.179664  | -1.494944 |
| Al | 1.212853  | 1.948299  | 3.740372  |
| Al | 1.267175  | 3.309924  | 1.444291  |
| Al | 1.959851  | -4.311390 | 1.261596  |
| Al | 2.006770  | -1.888709 | -2.757758 |



|    |          |           |           |
|----|----------|-----------|-----------|
| Al | 2.035394 | -0.509751 | 3.854217  |
| Al | 2.345406 | 2.210600  | -0.733072 |
| Al | 2.845235 | 0.809150  | -3.089507 |
| Al | 2.960528 | -1.750617 | 1.678601  |
| Al | 3.098549 | 1.119065  | 1.775980  |
| Al | 3.176600 | -3.154526 | -0.751995 |
| Al | 3.222210 | -0.409718 | -0.611740 |

45

Al0Mg45

|    |           |           |           |
|----|-----------|-----------|-----------|
| Mg | -1.800267 | -1.879042 | -6.481180 |
| Mg | 1.623801  | -0.927847 | -6.165768 |
| Mg | -0.962206 | 1.551719  | -5.779895 |
| Mg | 2.496444  | 2.486541  | -5.394274 |
| Mg | -0.058846 | 4.934839  | -4.941722 |
| Mg | 0.409759  | -4.077846 | -4.700779 |
| Mg | -3.749290 | -0.031551 | -4.134138 |
| Mg | -2.912092 | -3.503811 | -3.483548 |
| Mg | -0.440260 | -0.987737 | -3.387775 |
| Mg | -2.868418 | 3.415038  | -3.355425 |
| Mg | 3.117174  | -0.104537 | -3.064104 |
| Mg | 2.715222  | 4.942841  | -2.662867 |
| Mg | 0.413984  | 2.354621  | -2.632628 |
| Mg | 1.916763  | -3.207749 | -1.624302 |
| Mg | -0.626986 | -5.670439 | -1.610125 |
| Mg | -0.606548 | 5.516794  | -1.445536 |
| Mg | -4.843625 | -1.629179 | -1.084918 |
| Mg | -2.365902 | 0.841776  | -1.049214 |
| Mg | -3.958045 | -5.037054 | -0.426174 |
| Mg | 0.927841  | -0.144703 | -0.409322 |
| Mg | -1.506820 | -2.544666 | -0.406452 |
| Mg | 3.329262  | 2.318731  | -0.375909 |
| Mg | -3.418426 | 3.946588  | 0.174928  |
| Mg | 4.133691  | -1.137621 | 0.359001  |
| Mg | -0.123118 | 2.868652  | 0.816560  |
| Mg | 2.052649  | -5.748299 | 0.830864  |
| Mg | 2.209624  | 5.427005  | 0.897061  |
| Mg | -4.697918 | 0.849222  | 1.556187  |
| Mg | 1.141439  | -2.591793 | 1.925384  |
| Mg | -1.297833 | -5.139856 | 1.956862  |
| Mg | -1.144038 | 5.971840  | 2.061066  |
| Mg | -1.382090 | -0.139928 | 2.183063  |
| Mg | -3.866604 | -2.622055 | 2.228108  |
| Mg | 1.995509  | 0.749393  | 2.680277  |
| Mg | 4.305029  | -3.649331 | 2.848134  |
| Mg | 4.358812  | 3.273414  | 2.868964  |
| Mg | -2.443743 | 2.944158  | 3.485719  |
| Mg | 5.177644  | -0.235697 | 3.619478  |
| Mg | 1.005436  | 3.870529  | 3.992488  |
| Mg | 1.408894  | -5.135749 | 4.308714  |
| Mg | -1.151841 | -2.669224 | 4.609089  |
| Mg | -3.680341 | -0.149450 | 4.825449  |
| Mg | 2.287753  | -1.749144 | 5.153815  |
| Mg | -0.271517 | 0.774690  | 5.387178  |
| Mg | 3.150043  | 1.675918  | 5.847667  |

45

Al1Mg44

|    |           |           |           |
|----|-----------|-----------|-----------|
| Al | 2.929209  | 2.087868  | -0.522690 |
| Mg | -6.007147 | 0.055534  | 0.441243  |
| Mg | -5.878334 | -1.905176 | -2.477913 |
| Mg | -5.503659 | 3.501522  | -0.264045 |
| Mg | -5.162773 | 2.349131  | 3.047581  |
| Mg | -4.704449 | -3.153804 | 0.808157  |
| Mg | -4.439998 | -0.976106 | 3.658381  |
| Mg | -4.242994 | 1.159967  | -2.738762 |
| Mg | -3.826492 | -4.685846 | -2.442608 |
| Mg | -2.934709 | -1.655111 | -4.796698 |
| Mg | -2.818532 | -4.163844 | 3.772080  |
| Mg | -2.816902 | 1.331387  | 0.480113  |
| Mg | -2.743794 | 4.577556  | 1.922070  |
| Mg | -2.506689 | -1.615614 | -1.444685 |
| Mg | -2.353937 | 3.952022  | -1.711668 |
| Mg | -1.857499 | -5.123957 | 0.474351  |
| Mg | -1.709075 | 1.531992  | 3.717708  |
| Mg | -1.599441 | -1.545535 | 1.863138  |

|    |           |           |           |
|----|-----------|-----------|-----------|
| Mg | -1.122825 | 1.568023  | -4.431810 |
| Mg | -0.584108 | -1.620995 | 5.138309  |
| Mg | -0.400481 | 6.383716  | 0.039369  |
| Mg | -0.397151 | -4.987282 | -2.924540 |
| Mg | 0.105519  | 0.742045  | -1.383496 |
| Mg | 0.267595  | 3.072583  | 0.961843  |
| Mg | 0.334389  | 4.525298  | 4.025236  |
| Mg | 0.523323  | -2.825459 | -0.427101 |
| Mg | 0.600927  | -1.686271 | -3.850270 |
| Mg | 0.663064  | -4.068744 | 2.868223  |
| Mg | 0.993880  | 3.991333  | -2.250742 |
| Mg | 1.441520  | 1.250275  | 5.115609  |
| Mg | 1.529051  | -0.005497 | 1.593373  |
| Mg | 1.536107  | -6.111810 | 0.035645  |
| Mg | 2.567567  | 1.436083  | -3.718910 |
| Mg | 2.887512  | 5.204940  | 0.324222  |
| Mg | 3.036148  | -0.909895 | -1.367314 |
| Mg | 3.038068  | -1.732998 | 4.163164  |
| Mg | 3.090145  | -4.192462 | -2.503863 |
| Mg | 3.254371  | 2.757103  | 2.613931  |
| Mg | 3.660730  | -3.326376 | 1.070331  |
| Mg | 4.340408  | 4.157455  | -2.585900 |
| Mg | 4.395310  | -1.504968 | -4.460787 |
| Mg | 4.924975  | 0.136766  | 1.197999  |
| Mg | 5.616296  | 1.070619  | -2.091871 |
| Mg | 5.756236  | 3.355584  | 0.410393  |
| Mg | 6.118639  | -2.401053 | -1.346794 |

45

Al<sub>2</sub>Mg<sub>43</sub>

|    |           |           |           |
|----|-----------|-----------|-----------|
| Al | -3.089980 | -0.396805 | -3.675320 |
| Al | 1.651476  | -1.109602 | 3.886620  |
| Mg | -1.872386 | 0.068165  | -6.639377 |
| Mg | 2.041159  | -0.544688 | -6.027477 |
| Mg | -5.205148 | 0.427995  | -5.961825 |
| Mg | -3.784018 | -2.661934 | -5.872663 |
| Mg | -2.989782 | 2.684815  | -4.716013 |
| Mg | -0.663222 | -2.361150 | -4.588303 |
| Mg | 5.102591  | -1.489735 | -4.495100 |
| Mg | -0.160277 | 1.020464  | -3.887007 |
| Mg | -6.016590 | -1.755253 | -3.467802 |
| Mg | 3.514433  | 1.445790  | -3.229229 |
| Mg | -5.552085 | 1.535252  | -2.749213 |
| Mg | 2.173588  | -1.654714 | -2.626459 |
| Mg | -3.207331 | -3.468371 | -2.601052 |
| Mg | 2.784789  | 4.611127  | -2.014134 |
| Mg | -0.697218 | 4.816720  | -1.552203 |
| Mg | 0.150474  | -4.414985 | -1.525159 |
| Mg | -2.449133 | 1.846603  | -1.487290 |
| Mg | -0.991564 | -1.177476 | -1.442835 |
| Mg | 5.393379  | -0.769265 | -1.060021 |
| Mg | 0.961835  | 1.802889  | -0.741612 |
| Mg | -4.299751 | -0.864933 | -0.666754 |
| Mg | 3.607849  | -3.960668 | -0.457669 |
| Mg | 4.238042  | 2.354844  | 0.374391  |
| Mg | 2.530968  | -0.852782 | 0.802645  |
| Mg | -4.871893 | 2.240985  | 0.969157  |
| Mg | -2.496618 | -3.373834 | 0.982934  |
| Mg | 1.590176  | 4.939413  | 1.258233  |
| Mg | -1.443368 | 3.078193  | 1.609994  |
| Mg | -0.688144 | -0.445685 | 1.783201  |
| Mg | 0.871045  | -3.551369 | 1.892297  |
| Mg | 1.597522  | 1.790629  | 2.651483  |
| Mg | 4.092506  | -3.019324 | 2.916076  |
| Mg | -3.869346 | -0.491084 | 3.008312  |
| Mg | 4.543833  | 0.313599  | 3.332308  |
| Mg | 3.998380  | 3.908512  | 3.774639  |
| Mg | -3.576936 | 2.837672  | 4.309875  |
| Mg | -1.217473 | -2.552167 | 4.393185  |
| Mg | 0.199970  | 4.203807  | 4.627339  |
| Mg | -0.792999 | 0.801738  | 4.896776  |
| Mg | 1.740059  | -4.085866 | 5.135252  |
| Mg | 2.439175  | 1.351902  | 5.872626  |
| Mg | 3.987563  | -1.676823 | 6.040917  |
| Mg | 0.724450  | -1.402600 | 6.966257  |

45  
 Al3Mg42

|    |           |           |           |
|----|-----------|-----------|-----------|
| Al | -2.116939 | -3.342364 | 2.857346  |
| Al | -1.448718 | 4.680399  | 0.213457  |
| Al | 3.284369  | -1.211275 | -3.194731 |
| Mg | -5.237562 | -2.709902 | 3.440410  |
| Mg | -4.618941 | 3.974805  | 0.275751  |
| Mg | -4.257368 | -4.545678 | 0.747662  |
| Mg | -3.925269 | -5.812855 | 3.897657  |
| Mg | -3.609653 | -1.191827 | 0.857184  |
| Mg | -3.487226 | 7.119582  | -0.357277 |
| Mg | -3.118968 | 5.782583  | 2.754318  |
| Mg | -3.010282 | -3.267317 | 5.973641  |
| Mg | -2.987139 | 4.629683  | -2.642444 |
| Mg | -2.800101 | -0.455061 | 4.120935  |
| Mg | -2.590183 | -1.399738 | -2.717363 |
| Mg | -2.405346 | 2.486250  | 2.371420  |
| Mg | -2.355316 | 1.746728  | -0.927223 |
| Mg | -1.670090 | 1.611746  | -4.412215 |
| Mg | -1.430007 | -6.257993 | 1.632150  |
| Mg | -1.228649 | -3.432603 | -0.246398 |
| Mg | -0.677849 | -5.448314 | 4.864195  |
| Mg | -0.574374 | 7.572308  | 1.366825  |
| Mg | -0.499029 | 6.892109  | -1.956853 |
| Mg | -0.386200 | -0.889864 | 1.730200  |
| Mg | 0.046359  | -2.087793 | 4.940269  |
| Mg | 0.102498  | 4.708663  | 3.060454  |
| Mg | 0.221837  | 3.620575  | -2.307642 |
| Mg | 0.443780  | 1.404182  | 4.252437  |
| Mg | 0.524491  | 0.015812  | -2.039482 |
| Mg | 0.558132  | 2.236629  | 0.736305  |
| Mg | 0.699594  | -3.196858 | -3.228485 |
| Mg | 0.970995  | -0.591746 | -5.376382 |
| Mg | 1.010198  | -3.979017 | 2.343402  |
| Mg | 1.290106  | -5.779691 | -0.704204 |
| Mg | 1.742866  | 5.370761  | 0.157782  |
| Mg | 2.276181  | -2.293490 | -0.357962 |
| Mg | 2.741931  | 1.888024  | -3.873237 |
| Mg | 2.951132  | -0.567345 | 2.619500  |
| Mg | 3.059099  | -3.275124 | -5.676821 |
| Mg | 3.324455  | 3.029937  | 2.555794  |
| Mg | 3.514045  | 0.900810  | -0.683441 |
| Mg | 3.886283  | -4.323271 | -2.557497 |
| Mg | 4.295235  | -0.141863 | -6.080792 |
| Mg | 5.563506  | -1.811999 | -0.965349 |
| Mg | 5.852378  | 0.766220  | -3.165247 |
| Mg | 6.075737  | -2.424822 | -4.298051 |

45  
 Al4Mg41

|    |           |           |           |
|----|-----------|-----------|-----------|
| Al | -2.629074 | 3.920784  | -2.535382 |
| Al | -1.886262 | -1.556259 | 4.055013  |
| Al | 3.204360  | -2.326025 | -1.989565 |
| Al | 3.402069  | -0.870318 | 0.341638  |
| Mg | -5.761208 | 3.588866  | -3.237050 |
| Mg | -4.724235 | 4.923462  | -0.284538 |
| Mg | -4.720292 | -1.801787 | 5.543276  |
| Mg | -4.477487 | -1.974243 | 2.134899  |
| Mg | -4.259704 | 1.600955  | -0.905886 |
| Mg | -4.230811 | 6.639647  | -3.190131 |
| Mg | -3.890216 | 0.995778  | 3.771987  |
| Mg | -3.483413 | 1.261800  | -4.230705 |
| Mg | -3.455146 | 4.377459  | -5.618323 |
| Mg | -3.217524 | -4.488163 | 4.074631  |
| Mg | -2.900961 | -1.741972 | -1.649415 |
| Mg | -2.255285 | 0.275275  | 6.673521  |
| Mg | -1.902638 | -0.000378 | 1.260834  |
| Mg | -1.849302 | -3.105432 | 6.871007  |
| Mg | -1.793467 | 3.452029  | 0.589380  |
| Mg | -1.762492 | 6.529216  | -0.839370 |
| Mg | -1.456824 | -3.399478 | 1.375238  |
| Mg | -1.035093 | 1.257196  | -1.948963 |
| Mg | -0.979534 | 6.189723  | -4.127613 |
| Mg | -0.497497 | 2.894513  | -4.807743 |
| Mg | -0.480000 | 1.407670  | 3.983965  |

|    |          |           |           |
|----|----------|-----------|-----------|
| Mg | 0.172376 | -4.079941 | 4.289082  |
| Mg | 0.493514 | -1.431171 | -0.723096 |
| Mg | 0.558697 | 4.208959  | -1.802085 |
| Mg | 0.625137 | -4.375175 | -2.269416 |
| Mg | 0.761297 | -1.125500 | 5.911844  |
| Mg | 0.777407 | -1.425373 | -4.061973 |
| Mg | 1.001843 | -1.310959 | 2.560755  |
| Mg | 1.241999 | 1.581392  | 0.769945  |
| Mg | 2.250082 | -3.889222 | 0.699883  |
| Mg | 2.546838 | 0.836090  | -2.252892 |
| Mg | 2.918541 | -4.008621 | -4.748587 |
| Mg | 3.534831 | 0.855338  | 3.151215  |
| Mg | 3.818451 | -5.509735 | -1.825028 |
| Mg | 4.100297 | -0.832134 | -4.732316 |
| Mg | 4.160118 | -2.483054 | 3.087183  |
| Mg | 4.524108 | 2.182398  | 0.150249  |
| Mg | 5.528492 | -3.236371 | 0.035241  |
| Mg | 5.726299 | -0.341559 | -1.781847 |
| Mg | 5.963562 | -3.340906 | -3.343061 |
| Mg | 6.338149 | -0.324771 | 1.574201  |

|         |           |           |           |
|---------|-----------|-----------|-----------|
| 45      |           |           |           |
| Al5Mg40 |           |           |           |
| Al      | -1.654531 | -3.171828 | -2.136085 |
| Al      | 0.049383  | 1.856861  | -2.110287 |
| Al      | -4.169505 | -2.735070 | -1.133408 |
| Al      | 4.133437  | 1.375941  | 2.678201  |
| Al      | 1.636177  | 2.483796  | 2.917668  |
| Mg      | -1.346369 | -3.854888 | -5.286192 |
| Mg      | 0.791390  | 2.416026  | -5.131157 |
| Mg      | -3.684166 | -1.721216 | -4.175738 |
| Mg      | -0.391215 | -0.713620 | -4.136791 |
| Mg      | -2.460840 | 2.044165  | -4.104565 |
| Mg      | -3.915943 | -5.045339 | -3.362508 |
| Mg      | 1.388992  | -3.523469 | -3.326431 |
| Mg      | -6.649857 | -3.032375 | -3.197712 |
| Mg      | 2.734947  | 0.385563  | -3.190239 |
| Mg      | -0.599760 | 4.798234  | -3.067292 |
| Mg      | -0.744451 | -6.176585 | -2.850829 |
| Mg      | 2.614856  | 3.752368  | -2.482781 |
| Mg      | -5.677080 | 0.051122  | -2.067793 |
| Mg      | -2.383566 | -0.148125 | -1.529534 |
| Mg      | 0.725805  | -1.209806 | -0.979033 |
| Mg      | -2.640239 | 3.177357  | -0.858950 |
| Mg      | -6.063480 | -5.322882 | -0.736012 |
| Mg      | -2.716389 | -5.440413 | -0.169443 |
| Mg      | 0.573479  | -4.521099 | -0.168690 |
| Mg      | 5.729455  | 1.912614  | -0.163134 |
| Mg      | 2.419190  | 1.480134  | 0.015581  |
| Mg      | -7.129221 | -2.170433 | 0.061952  |
| Mg      | 0.483391  | 4.183563  | 0.193168  |
| Mg      | 4.405037  | -1.166609 | 0.578863  |
| Mg      | -1.750745 | -2.364089 | 0.989278  |
| Mg      | -0.727365 | 1.141445  | 1.056139  |
| Mg      | -4.443997 | -0.322996 | 1.114345  |
| Mg      | 3.751791  | 4.274585  | 1.274225  |
| Mg      | -4.719262 | -3.656982 | 1.929166  |
| Mg      | 7.073180  | 0.050507  | 2.348210  |
| Mg      | 1.669156  | -0.720400 | 2.515643  |
| Mg      | 6.659486  | 3.403607  | 2.776763  |
| Mg      | -1.382474 | 3.779151  | 3.035048  |
| Mg      | 1.394924  | 5.701546  | 3.187377  |
| Mg      | 4.581117  | -1.556003 | 3.995343  |
| Mg      | -0.673484 | 0.756273  | 4.446250  |
| Mg      | 3.884724  | 3.886537  | 4.679618  |
| Mg      | 5.955597  | 1.268068  | 5.344697  |
| Mg      | 2.592979  | 0.798351  | 5.444623  |
| Mg      | 0.675446  | 3.596414  | 5.782444  |

|         |           |           |           |
|---------|-----------|-----------|-----------|
| 45      |           |           |           |
| Al6Mg39 |           |           |           |
| Al      | -4.449232 | -1.820604 | -0.767376 |
| Al      | -2.797699 | -2.662207 | 1.251026  |
| Al      | -1.784743 | -1.517042 | -0.983947 |
| Al      | 1.462849  | 3.902073  | 0.251478  |
| Al      | 2.308750  | 1.311505  | 0.933695  |

|    |           |           |           |
|----|-----------|-----------|-----------|
| Al | 4.429751  | 0.071565  | -0.424169 |
| Mg | -7.636648 | -2.264416 | -0.423446 |
| Mg | -6.284724 | -0.774445 | -3.226992 |
| Mg | -6.263366 | 0.841914  | -0.245951 |
| Mg | -5.823080 | -4.088059 | -2.647889 |
| Mg | -5.624902 | -1.470391 | 2.213507  |
| Mg | -5.359468 | -4.524735 | 0.731372  |
| Mg | -4.109284 | -4.023234 | 3.874841  |
| Mg | -3.474588 | 0.902671  | -2.261453 |
| Mg | -3.211881 | -2.138604 | -3.760495 |
| Mg | -3.199529 | 0.554487  | 1.058910  |
| Mg | -2.746391 | -4.520294 | -1.405095 |
| Mg | -2.744541 | -0.905720 | 4.028529  |
| Mg | -2.322598 | -5.853647 | 1.641568  |
| Mg | -1.751478 | 4.519354  | 0.284932  |
| Mg | -0.697227 | -3.581154 | 3.590525  |
| Mg | -0.500278 | 1.530698  | -0.645780 |
| Mg | -0.492452 | -0.006995 | -3.643458 |
| Mg | -0.265874 | 2.494253  | 2.568767  |
| Mg | -0.210748 | -0.788431 | 1.745655  |
| Mg | -0.060292 | -3.333716 | -3.079848 |
| Mg | -0.028007 | 4.197827  | -2.654579 |
| Mg | 0.091735  | -3.821815 | 0.294885  |
| Mg | 0.402684  | 5.823466  | 2.615734  |
| Mg | 0.570603  | 6.871469  | -0.627957 |
| Mg | 1.505640  | -1.065985 | -1.093018 |
| Mg | 1.946043  | 0.473083  | 4.096117  |
| Mg | 2.467688  | 1.979342  | -2.146489 |
| Mg | 2.925705  | 3.583241  | 3.102960  |
| Mg | 3.031207  | -1.754796 | 1.822541  |
| Mg | 3.200120  | 5.265215  | -2.125971 |
| Mg | 3.446349  | 6.297894  | 1.123902  |
| Mg | 3.824247  | -0.783980 | -3.529963 |
| Mg | 4.179140  | -3.124212 | -1.062539 |
| Mg | 4.649234  | 3.257538  | 0.193006  |
| Mg | 4.993272  | 0.918195  | 2.632281  |
| Mg | 5.782915  | 1.928792  | -2.716444 |
| Mg | 6.377487  | -1.876684 | 1.255446  |
| Mg | 6.867917  | -1.252667 | -2.065172 |
| Mg | 7.375695  | 1.229255  | 0.226355  |

45

Al7Mg38

|    |           |           |           |
|----|-----------|-----------|-----------|
| Al | 4.108577  | 0.076616  | -1.477310 |
| Al | -3.399692 | -1.887803 | -0.755446 |
| Al | -3.503994 | 0.827018  | -0.572131 |
| Al | 1.700336  | -0.238217 | -0.309213 |
| Al | 2.971857  | 2.136320  | -0.023705 |
| Al | 3.892919  | -0.124716 | 1.267673  |
| Al | -4.310718 | -0.705993 | 1.531660  |
| Mg | 4.205165  | 0.353448  | -4.692964 |
| Mg | -4.093658 | -0.354807 | -3.508770 |
| Mg | -2.129367 | -3.186040 | -3.477758 |
| Mg | 1.957848  | -1.748470 | -3.130123 |
| Mg | 5.329522  | -2.438734 | -3.095317 |
| Mg | -2.315448 | 2.580312  | -3.087108 |
| Mg | 1.638806  | 1.616312  | -2.923711 |
| Mg | 7.025920  | 0.519092  | -2.766372 |
| Mg | -5.460104 | -3.401477 | -2.699331 |
| Mg | 4.679829  | 3.041343  | -2.596001 |
| Mg | -5.660368 | 2.449697  | -2.308023 |
| Mg | -0.982442 | -0.335258 | -2.204163 |
| Mg | 1.801896  | 4.699513  | -1.631233 |
| Mg | -6.338751 | -0.606318 | -0.997670 |
| Mg | -3.096358 | -5.087834 | -0.867171 |
| Mg | -0.094687 | -3.174511 | -0.635017 |
| Mg | 3.413953  | -2.911493 | -0.357887 |
| Mg | -0.323713 | 2.355664  | -0.253458 |
| Mg | -3.421018 | 4.040037  | -0.252454 |
| Mg | 6.497280  | -1.490493 | -0.019119 |
| Mg | 6.179897  | 1.880560  | 0.202365  |
| Mg | 4.622626  | 4.881948  | 0.303238  |
| Mg | -5.734724 | -3.482782 | 0.715249  |
| Mg | -1.171176 | -0.566385 | 1.073734  |
| Mg | -5.928445 | 2.052501  | 1.087056  |

|    |           |           |          |
|----|-----------|-----------|----------|
| Mg | 1.546409  | 4.452825  | 1.747164 |
| Mg | -2.553796 | -3.417934 | 1.971044 |
| Mg | -7.472792 | -0.855633 | 2.145713 |
| Mg | 1.542000  | -2.140862 | 2.302907 |
| Mg | -2.738274 | 2.043777  | 2.335634 |
| Mg | 1.223700  | 1.216023  | 2.538752 |
| Mg | 4.886458  | -2.859822 | 2.675711 |
| Mg | 4.262467  | 2.639733  | 2.880276 |
| Mg | 6.578995  | 0.094030  | 3.035407 |
| Mg | -5.201612 | -2.623547 | 3.970524 |
| Mg | -2.320151 | -0.810351 | 4.185891 |
| Mg | -5.319371 | 0.809119  | 4.198227 |
| Mg | 3.504196  | -0.316408 | 4.473229 |

45  
Al8Mg37

|    |           |           |           |
|----|-----------|-----------|-----------|
| Al | 1.163506  | -0.665693 | -4.587390 |
| Al | 0.442593  | 1.682393  | -3.346687 |
| Al | -1.150499 | -0.542490 | -3.100673 |
| Al | 1.304171  | -0.461242 | -1.817635 |
| Al | -0.700830 | 1.080788  | -0.892621 |
| Al | 1.106678  | -0.012554 | 0.986415  |
| Al | 0.698707  | 0.432385  | 3.805773  |
| Al | -1.459578 | -0.812192 | 5.041967  |
| Mg | 0.880997  | -0.814715 | -7.785540 |
| Mg | 3.931960  | -0.727222 | -6.225257 |
| Mg | 1.874863  | 2.055484  | -6.176669 |
| Mg | -1.320023 | 0.962759  | -5.926687 |
| Mg | 1.962627  | -3.480875 | -5.924446 |
| Mg | -1.323306 | -2.412258 | -5.685819 |
| Mg | -0.675884 | 4.167123  | -5.043504 |
| Mg | -4.026730 | -0.516773 | -4.525732 |
| Mg | 2.368432  | 4.267101  | -3.591049 |
| Mg | 3.624463  | 1.092873  | -3.423908 |
| Mg | -2.721704 | 2.272852  | -3.109186 |
| Mg | 3.605465  | -2.248242 | -3.102840 |
| Mg | 0.438086  | -3.357784 | -2.940056 |
| Mg | -2.972720 | -3.196943 | -2.770209 |
| Mg | -0.478498 | 4.229003  | -1.556698 |
| Mg | -3.659873 | -0.220784 | -1.059807 |
| Mg | 2.211836  | 2.454643  | -0.767651 |
| Mg | -1.031541 | -2.074741 | -0.275492 |
| Mg | 4.110818  | -0.239312 | -0.261777 |
| Mg | 2.175552  | -2.950197 | 0.016152  |
| Mg | -3.073029 | 2.890527  | 0.270989  |
| Mg | 0.037416  | 2.906093  | 1.693807  |
| Mg | -1.895210 | 0.184495  | 1.972997  |
| Mg | 3.247537  | 1.908516  | 2.353315  |
| Mg | 0.139547  | -2.510296 | 2.787590  |
| Mg | 3.273695  | -1.396628 | 2.905982  |
| Mg | -3.221793 | -2.712150 | 3.041815  |
| Mg | -4.420852 | 0.281295  | 4.199141  |
| Mg | -1.763167 | 2.364840  | 4.533933  |
| Mg | 1.429877  | 3.455129  | 4.758560  |
| Mg | -1.206566 | -4.019695 | 5.492543  |
| Mg | 3.421709  | 0.792230  | 5.544476  |
| Mg | 1.469966  | -1.941488 | 5.818356  |
| Mg | -3.998365 | -2.299890 | 6.370881  |
| Mg | 0.315778  | 1.078851  | 6.926050  |
| Mg | -3.063567 | 0.857599  | 7.290095  |
| Mg | -1.072541 | -1.802812 | 8.086497  |

45  
Al9Mg36

|    |           |           |           |
|----|-----------|-----------|-----------|
| Al | -2.629411 | 2.629772  | -0.804192 |
| Al | -2.412655 | -0.117203 | -0.511882 |
| Al | -0.919691 | 1.566299  | 1.065931  |
| Al | -0.342982 | 1.328316  | -1.597929 |
| Al | -0.151037 | 3.792446  | -0.371527 |
| Al | 0.248690  | -0.856286 | 0.130322  |
| Al | 0.825259  | -2.959369 | 1.850925  |
| Al | 1.403168  | -3.197861 | -0.818383 |
| Al | 2.885791  | -1.530269 | 0.761479  |
| Mg | -5.339108 | 0.928971  | -1.238899 |
| Mg | -5.273346 | 4.084394  | 0.238923  |
| Mg | -4.763532 | -1.810744 | 0.871032  |

|    |           |           |           |
|----|-----------|-----------|-----------|
| Mg | -4.556951 | 3.788711  | -3.070410 |
| Mg | -4.049007 | -2.105618 | -2.429110 |
| Mg | -4.021003 | 1.358708  | 1.850115  |
| Mg | -2.854420 | 0.877293  | -3.538398 |
| Mg | -2.549163 | 5.809624  | -1.070882 |
| Mg | -2.344555 | 4.276164  | 1.967402  |
| Mg | -1.860197 | -1.174473 | 2.496059  |
| Mg | -1.778235 | -3.278527 | -0.092085 |
| Mg | -1.735508 | -4.562517 | 3.010276  |
| Mg | -1.564541 | 1.763144  | 4.196703  |
| Mg | -1.171905 | 3.792232  | -3.449506 |
| Mg | -0.713333 | -1.647727 | -2.801131 |
| Mg | -0.512941 | -5.067051 | -2.636719 |
| Mg | -0.018235 | 6.585830  | 1.172493  |
| Mg | 0.117811  | -2.470818 | 4.972174  |
| Mg | 0.340255  | -5.867841 | 0.597928  |
| Mg | 0.361788  | 0.968265  | -4.701140 |
| Mg | 0.706111  | 6.286902  | -2.173651 |
| Mg | 0.910040  | 3.598864  | 2.705742  |
| Mg | 1.178157  | 0.067716  | 3.039110  |
| Mg | 1.496218  | -5.397341 | 3.815845  |
| Mg | 2.057739  | -3.271427 | -3.988149 |
| Mg | 2.071742  | 3.119483  | -2.660464 |
| Mg | 2.207922  | 1.641401  | 0.331335  |
| Mg | 2.323455  | -0.404909 | -2.250940 |
| Mg | 2.731637  | -5.907204 | -1.890511 |
| Mg | 2.814219  | 4.944030  | 0.167510  |
| Mg | 3.337929  | -2.479590 | 3.783547  |
| Mg | 3.474675  | -4.663581 | 1.168921  |
| Mg | 4.472506  | 0.570453  | 2.665902  |
| Mg | 4.503440  | -2.960558 | -1.599868 |
| Mg | 5.190265  | 0.274278  | -0.649359 |
| Mg | 5.902941  | -2.322384 | 1.485462  |

45

Al10Mg35

|    |           |           |           |
|----|-----------|-----------|-----------|
| Al | -4.117987 | -0.695247 | -1.398603 |
| Al | -3.189332 | -1.494877 | 1.085536  |
| Al | -2.524525 | 0.988568  | 0.095085  |
| Al | -1.450692 | -1.274553 | -1.046457 |
| Al | -0.612961 | -0.493305 | 1.475117  |
| Al | 0.161329  | 0.973514  | -0.724327 |
| Al | 1.248315  | -1.513665 | -0.320443 |
| Al | 1.993594  | 0.599352  | 1.337363  |
| Al | 2.880662  | 0.571557  | -1.217359 |
| Al | 4.488915  | 1.619472  | 0.778529  |
| Mg | -7.198893 | 0.059980  | -1.677179 |
| Mg | -6.098880 | -2.532746 | 0.346016  |
| Mg | -5.840630 | -2.772256 | -3.101533 |
| Mg | -5.509535 | 0.727369  | 1.179057  |
| Mg | -5.138850 | -1.644240 | 3.599513  |
| Mg | -5.007705 | 0.309913  | -4.307914 |
| Mg | -4.708266 | 2.491701  | -1.641575 |
| Mg | -3.835055 | -4.426690 | 2.178140  |
| Mg | -3.691768 | 3.623124  | 1.437457  |
| Mg | -3.307552 | -3.848334 | -1.153577 |
| Mg | -2.853477 | 0.853564  | 3.315958  |
| Mg | -2.507201 | -2.067763 | -3.912854 |
| Mg | -1.982341 | 1.156911  | -3.090499 |
| Mg | -1.673815 | -2.238429 | 3.894172  |
| Mg | -1.365091 | 3.762441  | -1.122552 |
| Mg | -0.764508 | -3.665652 | 0.989719  |
| Mg | -0.448256 | 2.681365  | 1.939757  |
| Mg | 0.064080  | -3.806032 | -2.278297 |
| Mg | 0.593707  | 0.515951  | 4.258900  |
| Mg | 0.727835  | -0.731117 | -3.388794 |
| Mg | 1.246109  | 2.583020  | -3.241857 |
| Mg | 1.682806  | -2.293361 | 2.800919  |
| Mg | 1.973777  | 3.498213  | -0.133436 |
| Mg | 2.430743  | -4.437265 | 0.151166  |
| Mg | 2.747130  | 3.108610  | 3.122687  |
| Mg | 3.467275  | -2.394677 | -2.433745 |
| Mg | 3.811324  | 0.505815  | -4.250797 |
| Mg | 4.083442  | 0.053890  | 3.647432  |
| Mg | 4.235489  | -1.627409 | 0.741489  |

|    |          |           |           |
|----|----------|-----------|-----------|
| Mg | 4.615260 | 3.080218  | -2.126965 |
| Mg | 4.847606 | 4.822844  | 0.896919  |
| Mg | 5.978588 | -0.013813 | -1.611985 |
| Mg | 6.164515 | 2.770420  | 3.250848  |
| Mg | 7.030324 | -0.126427 | 1.728272  |
| Mg | 7.354496 | 2.740047  | -0.069303 |

|          |           |           |           |
|----------|-----------|-----------|-----------|
| 45       |           |           |           |
| Al11Mg34 |           |           |           |
| Al       | -3.385627 | 0.543756  | 0.888107  |
| Al       | -3.079868 | -1.024454 | -1.418265 |
| Al       | -1.886408 | -1.775005 | 0.956890  |
| Al       | -1.015174 | 0.477353  | -0.459098 |
| Al       | -0.951237 | 0.489371  | 2.277312  |
| Al       | -0.461067 | -2.024864 | -1.420389 |
| Al       | 0.816320  | -1.166140 | 0.901139  |
| Al       | 1.211210  | 1.569504  | 0.781497  |
| Al       | 1.513598  | 0.018289  | -1.499904 |
| Al       | 3.236732  | 2.118142  | -1.011197 |
| Al       | 3.366497  | -0.151487 | 0.549236  |
| Mg       | -6.106153 | 0.566098  | 2.483114  |
| Mg       | -5.921983 | 0.387452  | -1.048512 |
| Mg       | -5.447169 | -2.813289 | -2.486848 |
| Mg       | -5.011418 | -2.261386 | 0.873283  |
| Mg       | -4.983205 | 3.276456  | 0.750269  |
| Mg       | -4.331366 | -0.067104 | -4.167112 |
| Mg       | -3.376398 | -1.094602 | 3.686369  |
| Mg       | -3.195792 | 2.311238  | 3.583327  |
| Mg       | -3.185007 | 2.211596  | -1.925899 |
| Mg       | -2.842652 | -4.322252 | 2.562129  |
| Mg       | -2.769075 | -4.209382 | -0.894514 |
| Mg       | -2.196330 | -2.814804 | -3.955659 |
| Mg       | -1.545712 | 3.322540  | 0.832854  |
| Mg       | -0.955134 | 0.293069  | -3.622647 |
| Mg       | -0.846152 | 0.552524  | 5.413739  |
| Mg       | -0.218906 | -2.372316 | 3.656575  |
| Mg       | 0.152421  | -4.276766 | 0.855697  |
| Mg       | 0.211085  | -4.870490 | -2.561898 |
| Mg       | 0.214904  | 2.953772  | -1.979895 |
| Mg       | 0.494507  | 3.129434  | 3.464418  |
| Mg       | 1.484478  | -1.949085 | -4.004665 |
| Mg       | 1.751736  | 4.650929  | 0.487954  |
| Mg       | 2.023969  | 0.134225  | 3.543544  |
| Mg       | 2.364056  | 1.509936  | -4.131498 |
| Mg       | 2.627048  | -2.959259 | -1.006187 |
| Mg       | 2.920515  | 4.728445  | -2.828107 |
| Mg       | 3.030952  | -2.870137 | 2.353253  |
| Mg       | 3.848194  | 2.604357  | 2.178475  |
| Mg       | 4.464287  | -0.555890 | -2.469463 |
| Mg       | 5.177361  | 4.522085  | -0.273668 |
| Mg       | 5.360114  | -0.340711 | 3.014670  |
| Mg       | 5.556374  | 2.578753  | -3.131636 |
| Mg       | 5.731405  | -2.245093 | 0.213636  |
| Mg       | 6.154067  | 1.215192  | -0.010424 |

|          |           |           |           |
|----------|-----------|-----------|-----------|
| 45       |           |           |           |
| Al12Mg33 |           |           |           |
| Al       | -2.813446 | 0.401781  | 2.260431  |
| Al       | -2.294671 | -2.281545 | 1.629149  |
| Al       | -1.670565 | -0.322871 | -0.111204 |
| Al       | -0.680729 | 1.904725  | 1.181648  |
| Al       | -0.517933 | 1.661764  | -1.622670 |
| Al       | -0.274572 | -0.626836 | 2.343172  |
| Al       | -0.044086 | -1.022070 | -2.219109 |
| Al       | 0.109171  | -2.433372 | 0.200954  |
| Al       | 1.091482  | 0.117357  | 0.092817  |
| Al       | 1.607657  | 2.752793  | -0.272533 |
| Al       | 2.031099  | 0.827038  | -2.340495 |
| Al       | 2.425310  | -1.796983 | -1.295618 |
| Mg       | -5.729285 | 1.571680  | 2.056394  |
| Mg       | -5.041545 | -1.702954 | 3.191852  |
| Mg       | -4.745636 | -0.972109 | -0.053158 |
| Mg       | -4.071789 | 1.216488  | 5.014995  |
| Mg       | -3.484791 | 2.230453  | -0.416059 |
| Mg       | -3.247965 | -4.667575 | 3.330627  |
| Mg       | -3.004170 | 0.055587  | -2.964931 |



|    |           |           |           |
|----|-----------|-----------|-----------|
| Mg | -2.879310 | 3.650461  | 2.583295  |
| Mg | -2.563186 | -3.013461 | -1.552178 |
| Mg | -2.347878 | 3.395793  | -3.497340 |
| Mg | -2.060838 | -1.575558 | 4.760543  |
| Mg | -1.330259 | -2.333643 | -4.767615 |
| Mg | -1.255450 | -5.240282 | 0.533260  |
| Mg | -1.063518 | 4.594027  | -0.525817 |
| Mg | -0.759971 | 1.744110  | 4.395647  |
| Mg | -0.179214 | 0.961607  | -4.720000 |
| Mg | 0.165685  | -3.692633 | 3.163568  |
| Mg | 0.504953  | -4.138335 | -2.489078 |
| Mg | 0.698778  | 4.478772  | 2.345037  |
| Mg | 1.080236  | 3.805686  | -3.283063 |
| Mg | 1.310670  | -0.973132 | 5.036641  |
| Mg | 2.048407  | -1.621923 | -4.498236 |
| Mg | 2.140599  | 5.808738  | -0.711975 |
| Mg | 2.152784  | 1.473210  | 2.734548  |
| Mg | 2.340863  | -4.651005 | 0.288963  |
| Mg | 2.723804  | -1.792330 | 2.005834  |
| Mg | 3.182339  | 1.655996  | -5.116579 |
| Mg | 3.908725  | -4.028578 | -2.920657 |
| Mg | 4.081003  | 3.885372  | 1.317683  |
| Mg | 4.161802  | 0.655963  | 0.120426  |
| Mg | 4.198112  | 3.149364  | -2.126323 |
| Mg | 4.855440  | -0.511406 | -2.949745 |
| Mg | 5.241885  | -2.600165 | -0.133098 |

45

Al13Mg32

|    |           |           |           |
|----|-----------|-----------|-----------|
| Al | -2.251288 | 1.026878  | -1.063055 |
| Al | -2.104143 | 0.264121  | 1.660015  |
| Al | -2.047051 | -1.710738 | -0.368596 |
| Al | -0.644758 | 2.508625  | 0.737512  |
| Al | -0.552358 | -0.686767 | -2.544820 |
| Al | -0.314290 | -1.920952 | 1.861189  |
| Al | 0.000008  | -0.000006 | -0.000021 |
| Al | 0.314293  | 1.920927  | -1.861204 |
| Al | 0.552368  | 0.686755  | 2.544812  |
| Al | 0.644750  | -2.508624 | -0.737554 |
| Al | 2.047025  | 1.710739  | 0.368596  |
| Al | 2.104149  | -0.264117 | -1.660007 |
| Al | 2.251278  | -1.026900 | 1.063030  |
| Mg | -4.875508 | -0.319598 | 0.173932  |
| Mg | -4.839469 | 2.207420  | -2.285162 |
| Mg | -4.523116 | 0.567756  | 3.568478  |
| Mg | -4.400451 | -3.677443 | -0.792266 |
| Mg | -3.807639 | 2.893456  | 1.016243  |
| Mg | -3.693825 | -1.043744 | -3.028090 |
| Mg | -3.400466 | -2.564399 | 2.400751  |
| Mg | -1.966029 | 4.155089  | -1.665219 |
| Mg | -1.895658 | 1.721786  | -4.164722 |
| Mg | -1.672667 | 2.634446  | 3.763603  |
| Mg | -1.488495 | -3.736029 | -2.780216 |
| Mg | -1.420999 | -0.738690 | 4.619308  |
| Mg | -1.385923 | 5.392680  | 1.585371  |
| Mg | -1.307200 | -4.675859 | 0.574993  |
| Mg | -1.187339 | -1.476275 | -5.470465 |
| Mg | -0.675612 | -4.129307 | 4.000942  |
| Mg | 0.675624  | 4.129320  | -4.000923 |
| Mg | 1.187361  | 1.476269  | 5.470454  |
| Mg | 1.307164  | 4.675862  | -0.575033 |
| Mg | 1.385971  | -5.392647 | -1.585465 |
| Mg | 1.421072  | 0.738708  | -4.619296 |
| Mg | 1.488439  | 3.736020  | 2.780228  |
| Mg | 1.672687  | -2.634413 | -3.763650 |
| Mg | 1.895671  | -1.721831 | 4.164688  |
| Mg | 1.965986  | -4.155134 | 1.665157  |
| Mg | 3.400499  | 2.564419  | -2.400695 |
| Mg | 3.693809  | 1.043693  | 3.028098  |
| Mg | 3.807653  | -2.893441 | -1.016264 |
| Mg | 4.400310  | 3.677555  | 0.792437  |
| Mg | 4.523228  | -0.567746 | -3.568371 |
| Mg | 4.839437  | -2.207527 | 2.285110  |
| Mg | 4.875500  | 0.319663  | -0.173855 |

45

## Al14Mg31

|    |           |           |           |
|----|-----------|-----------|-----------|
| Al | -3.657074 | 0.533187  | -2.012079 |
| Al | -2.519182 | -0.885917 | -0.038571 |
| Al | -1.843315 | 1.855371  | -0.540596 |
| Al | -1.566163 | 0.762000  | 2.052634  |
| Al | -1.101181 | -0.173011 | -2.426960 |
| Al | -0.652708 | -1.912076 | 1.799145  |
| Al | -0.378402 | -2.484022 | -0.966123 |
| Al | 0.030869  | -0.004533 | 0.016983  |
| Al | 0.429785  | 2.478733  | 0.995029  |
| Al | 0.703131  | 1.902926  | -1.769595 |
| Al | 1.169696  | 0.159627  | 2.446299  |
| Al | 1.618565  | -0.770161 | -2.026348 |
| Al | 1.904441  | -1.848245 | 0.579011  |
| Al | 2.573428  | 0.865377  | 0.082008  |
| Mg | -5.556586 | -1.545596 | -0.524177 |
| Mg | -4.585207 | 1.319172  | 1.030414  |
| Mg | -4.285905 | 3.607630  | -1.467774 |
| Mg | -3.692439 | -1.523473 | 2.818410  |
| Mg | -3.426857 | 1.642763  | 4.357473  |
| Mg | -3.137144 | -2.638452 | -2.650086 |
| Mg | -2.891058 | -0.205507 | -5.013874 |
| Mg | -2.795860 | -3.973735 | 0.539651  |
| Mg | -2.363254 | 3.867871  | 1.831092  |
| Mg | -1.818491 | 2.710120  | -3.629674 |
| Mg | -1.472919 | -4.095100 | 3.823610  |
| Mg | -0.882476 | -5.310629 | -2.109119 |
| Mg | -0.852535 | -0.749440 | 4.764675  |
| Mg | -0.650281 | 4.729095  | -1.054177 |
| Mg | -0.027043 | 2.599074  | 4.151445  |
| Mg | -0.007038 | -2.571658 | -4.157514 |
| Mg | 0.609802  | -4.745536 | 1.048297  |
| Mg | 0.809358  | 0.739843  | -4.764038 |
| Mg | 0.851341  | 5.332583  | 2.097061  |
| Mg | 1.434251  | 4.086818  | -3.830247 |
| Mg | 1.805892  | -2.736227 | 3.652758  |
| Mg | 2.341861  | -3.874706 | -1.868967 |
| Mg | 2.474538  | 0.349769  | 5.240979  |
| Mg | 2.766702  | 4.003630  | -0.554078 |
| Mg | 3.139547  | 2.673487  | 2.662018  |
| Mg | 3.403787  | -1.643278 | -4.390093 |
| Mg | 3.673255  | 1.526004  | -2.858186 |
| Mg | 4.055823  | -3.971059 | 1.222650  |
| Mg | 4.267441  | -0.621983 | 2.348030  |
| Mg | 4.604258  | -1.329268 | -1.060453 |
| Mg | 5.495348  | 1.868530  | 0.153058  |

45

## Al15Mg30

|    |           |           |           |
|----|-----------|-----------|-----------|
| Al | -3.152551 | 0.415643  | 2.416288  |
| Al | -2.104672 | 1.447649  | 0.075959  |
| Al | -1.864748 | -1.291385 | 0.752504  |
| Al | -1.758152 | -0.547758 | -1.935684 |
| Al | -1.431617 | -1.484545 | 3.420030  |
| Al | -0.472009 | 0.782884  | 2.291471  |
| Al | -0.356764 | 1.898617  | -2.115208 |
| Al | 0.025372  | -2.517079 | -0.895429 |
| Al | 0.226717  | 0.092504  | -0.213548 |
| Al | 0.422985  | 2.702668  | 0.479719  |
| Al | 0.754555  | -1.709350 | 1.743579  |
| Al | 0.963293  | -0.557760 | -2.707450 |
| Al | 2.205824  | 0.734206  | 1.519495  |
| Al | 2.303230  | 1.444917  | -1.213650 |
| Al | 2.524340  | -1.282547 | -0.434850 |
| Mg | -4.871904 | 2.662364  | 0.946932  |
| Mg | -4.661348 | -0.437528 | -0.412188 |
| Mg | -4.237413 | -2.666866 | 2.216433  |
| Mg | -4.065981 | -1.277371 | -3.843255 |
| Mg | -4.063126 | -0.975919 | 5.118694  |
| Mg | -3.537110 | 2.005879  | -2.675884 |
| Mg | -3.056781 | -3.419129 | -1.231956 |
| Mg | -1.998815 | 3.525285  | 2.527959  |
| Mg | -1.887051 | 4.452762  | -0.860920 |
| Mg | -1.578749 | 1.291124  | 5.151308  |
| Mg | -1.208401 | -4.250154 | 1.601797  |

|    |           |           |           |
|----|-----------|-----------|-----------|
| Mg | -1.155473 | 0.504399  | -4.871064 |
| Mg | -1.037958 | 3.982256  | -4.279059 |
| Mg | -0.878899 | -2.873361 | -3.932723 |
| Mg | -0.239331 | -5.502835 | -1.611262 |
| Mg | 0.609972  | 5.665361  | 1.307132  |
| Mg | 0.800941  | -3.601265 | 4.255575  |
| Mg | 1.297249  | 3.056384  | 3.561973  |
| Mg | 1.452905  | -0.285775 | 4.541031  |
| Mg | 1.549738  | 4.468759  | -1.914247 |
| Mg | 1.828296  | -1.289395 | -5.575372 |
| Mg | 1.972785  | 2.025951  | -4.315138 |
| Mg | 2.177328  | -4.303810 | 0.657050  |
| Mg | 2.402798  | -3.424597 | -2.795646 |
| Mg | 3.479805  | 3.586627  | 0.823433  |
| Mg | 3.822127  | -1.850903 | 2.468797  |
| Mg | 4.145978  | -0.373525 | -3.047660 |
| Mg | 4.426065  | 1.452202  | 3.532479  |
| Mg | 5.067018  | 0.585201  | 0.137066  |
| Mg | 5.159531  | -2.860783 | -0.664514 |

|          |           |           |           |
|----------|-----------|-----------|-----------|
| 45       |           |           |           |
| Al16Mg29 |           |           |           |
| Al       | 0.543915  | -1.065846 | -3.704141 |
| Al       | -1.892124 | 0.296508  | -3.357493 |
| Al       | -1.512171 | 2.832064  | -2.201204 |
| Al       | 0.338003  | 0.922606  | -1.930394 |
| Al       | -1.024839 | -1.614643 | -1.562696 |
| Al       | 1.781279  | -1.360047 | -1.211295 |
| Al       | -2.264391 | 0.735319  | -0.656601 |
| Al       | 2.281800  | 1.199491  | 0.010752  |
| Al       | -0.264232 | 2.517829  | 0.283926  |
| Al       | 0.006126  | -0.184867 | 0.487831  |
| Al       | 0.218093  | -2.870273 | 0.615825  |
| Al       | -2.278803 | -1.567698 | 0.948287  |
| Al       | 2.247723  | -1.140513 | 1.590007  |
| Al       | -1.813511 | 0.981178  | 2.100857  |
| Al       | 0.981127  | 1.260566  | 2.515845  |
| Al       | -0.270375 | -1.264951 | 2.910688  |
| Mg       | -1.110227 | -0.421877 | -6.331033 |
| Mg       | -2.794053 | 2.770082  | -5.100254 |
| Mg       | 0.504850  | 2.107785  | -4.775766 |
| Mg       | -2.090559 | -2.873963 | -4.200503 |
| Mg       | 3.363528  | -2.546035 | -3.652692 |
| Mg       | 3.236313  | 0.802731  | -3.110964 |
| Mg       | 0.644358  | -4.132345 | -2.380503 |
| Mg       | -4.597551 | 1.878769  | -2.367887 |
| Mg       | 1.680854  | 3.751607  | -1.973919 |
| Mg       | -4.180690 | -1.519676 | -1.778051 |
| Mg       | -2.413968 | -4.301166 | -0.648220 |
| Mg       | 4.833540  | 2.791008  | -0.625710 |
| Mg       | -0.871834 | 5.483415  | -0.556817 |
| Mg       | 4.769249  | -0.763868 | -0.383423 |
| Mg       | 3.209005  | -3.843525 | 0.083982  |
| Mg       | -3.340699 | 3.422612  | 0.532499  |
| Mg       | 0.428495  | -5.936003 | 0.709725  |
| Mg       | -4.837336 | 0.293044  | 1.123182  |
| Mg       | 2.235173  | 4.040091  | 1.469032  |
| Mg       | 4.185317  | 1.231433  | 2.532190  |
| Mg       | -1.783516 | -4.081964 | 2.813046  |
| Mg       | 4.821374  | -2.252644 | 2.852236  |
| Mg       | -0.860267 | 3.870799  | 3.058468  |
| Mg       | 1.646261  | -3.774556 | 3.313101  |
| Mg       | -3.925068 | 2.317250  | 3.891960  |
| Mg       | -3.303991 | -1.199566 | 3.924430  |
| Mg       | 2.227463  | -0.660342 | 4.759769  |
| Mg       | 2.088432  | 2.927720  | 4.849995  |
| Mg       | -0.842073 | 0.942460  | 5.131931  |

|          |           |           |           |
|----------|-----------|-----------|-----------|
| 45       |           |           |           |
| Al17Mg28 |           |           |           |
| Al       | -2.203172 | 0.285608  | 2.596117  |
| Al       | -2.160898 | 0.041417  | -2.082630 |
| Al       | -1.685583 | -1.255627 | 0.370487  |
| Al       | -1.624684 | 1.564208  | 0.227382  |
| Al       | -0.622182 | -2.030371 | 2.796245  |
| Al       | -0.543686 | -2.294841 | -1.966759 |

|    |           |           |           |
|----|-----------|-----------|-----------|
| Al | -0.524226 | 2.539681  | 2.562462  |
| Al | -0.445479 | 2.305985  | -2.200020 |
| Al | -0.025983 | 0.324989  | 4.266029  |
| Al | 0.227057  | -0.087307 | -3.599036 |
| Al | 0.293499  | 0.047669  | -0.948959 |
| Al | 0.428472  | 0.182247  | 1.697222  |
| Al | 0.985421  | -2.213839 | 0.439237  |
| Al | 1.082775  | 2.411567  | 0.204311  |
| Al | 2.177578  | -1.483354 | -2.052752 |
| Al | 2.235492  | 1.383479  | -2.199115 |
| Al | 2.746544  | 0.063358  | 0.222127  |
| Mg | -4.966948 | 0.059024  | -3.329617 |
| Mg | -4.493315 | 0.228226  | 0.262441  |
| Mg | -3.763354 | -2.542622 | 2.317462  |
| Mg | -3.716987 | -2.710147 | -1.531769 |
| Mg | -3.633197 | 3.145389  | 2.026537  |
| Mg | -3.554307 | 2.940981  | -1.852556 |
| Mg | -2.573847 | -1.311852 | 5.292283  |
| Mg | -2.501743 | 2.162646  | 5.114157  |
| Mg | -2.204271 | -1.826374 | -4.664048 |
| Mg | -2.120719 | 1.685174  | -4.826936 |
| Mg | -1.506028 | -4.980402 | -3.102059 |
| Mg | -1.366010 | -4.367345 | 0.465971  |
| Mg | -1.172094 | 4.655949  | -0.017441 |
| Mg | 0.627620  | -2.435764 | 5.662724  |
| Mg | 0.743801  | 3.184188  | 5.376853  |
| Mg | 1.099129  | -2.987693 | -4.623351 |
| Mg | 1.199182  | 2.676642  | -4.903415 |
| Mg | 1.324428  | -4.528186 | 2.544384  |
| Mg | 1.515573  | 4.919380  | 2.056884  |
| Mg | 1.628943  | -4.601222 | -1.516303 |
| Mg | 1.757126  | 4.571300  | -2.009783 |
| Mg | 2.656920  | -1.466164 | 3.126967  |
| Mg | 2.724955  | 1.882331  | 2.955339  |
| Mg | 3.153496  | -0.198382 | -4.819183 |
| Mg | 4.079562  | -2.828093 | 0.147957  |
| Mg | 4.183849  | 2.891100  | -0.162692 |
| Mg | 5.053800  | -0.095335 | -1.944318 |
| Mg | 5.483488  | 0.092382  | 1.621165  |

45

Al18Mg27

|    |           |           |           |
|----|-----------|-----------|-----------|
| Al | -3.014887 | 0.043744  | 1.669257  |
| Al | -2.116605 | 0.573370  | -1.035667 |
| Al | -1.900423 | -2.541380 | 2.524105  |
| Al | -0.859993 | 1.764012  | 1.223793  |
| Al | -0.764266 | -1.003344 | 0.749185  |
| Al | -0.725713 | -0.090072 | 3.313742  |
| Al | -0.606907 | 2.940181  | -1.327104 |
| Al | -0.403606 | -1.673462 | -1.878771 |
| Al | -0.333270 | 0.827951  | -3.245348 |
| Al | -0.263680 | -3.567069 | 0.308205  |
| Al | 0.623716  | 0.629362  | -0.778492 |
| Al | 0.914306  | -2.243075 | 2.501308  |
| Al | 1.533626  | 0.357004  | 1.777323  |
| Al | 1.638509  | 2.816102  | 0.419690  |
| Al | 1.810212  | -1.743644 | -0.096663 |
| Al | 1.978186  | 2.259227  | -2.356020 |
| Al | 2.087078  | -0.590698 | -2.656475 |
| Al | 3.288295  | 0.648827  | -0.395777 |
| Mg | -5.227430 | 0.337474  | -0.582628 |
| Mg | -5.047607 | -2.314777 | 2.259311  |
| Mg | -3.489712 | 3.133465  | 0.278737  |
| Mg | -3.405881 | -0.749597 | 4.778720  |
| Mg | -3.243046 | -2.400065 | -0.567434 |
| Mg | -3.088596 | 2.486370  | -3.315348 |
| Mg | -2.910036 | -0.990048 | -3.705973 |
| Mg | -2.814196 | -5.246496 | 1.155370  |
| Mg | -2.645890 | 2.478829  | 3.699319  |
| Mg | -2.027690 | 5.585541  | -1.934160 |
| Mg | -1.463369 | -4.588842 | -2.438990 |
| Mg | -0.589419 | 4.903461  | 1.261935  |
| Mg | -0.476957 | -2.528161 | 5.363861  |
| Mg | -0.052762 | -5.148841 | 3.119477  |
| Mg | 0.023307  | 3.788291  | -4.344737 |

|    |          |           |           |
|----|----------|-----------|-----------|
| Mg | 0.280038 | -1.861168 | -4.938836 |
| Mg | 0.878281 | 2.792826  | 3.660423  |
| Mg | 1.539464 | 5.305373  | -1.545907 |
| Mg | 1.865223 | -3.857100 | -2.387040 |
| Mg | 2.048832 | 1.127275  | -5.336180 |
| Mg | 2.133004 | -0.325929 | 4.776096  |
| Mg | 2.686487 | -4.525141 | 1.049816  |
| Mg | 4.096642 | 2.098421  | 2.339375  |
| Mg | 4.108695 | -1.440874 | 2.048604  |
| Mg | 4.469252 | 3.563346  | -0.831091 |
| Mg | 4.676321 | -2.026928 | -1.400311 |
| Mg | 4.792466 | 0.996262  | -3.178699 |

45  
Al19Mg26

|    |           |           |           |
|----|-----------|-----------|-----------|
| Al | -3.274094 | -0.703704 | 0.535464  |
| Al | -2.685380 | 0.090847  | -2.158343 |
| Al | -2.586238 | -2.695741 | -1.430774 |
| Al | -1.715682 | 1.597173  | 0.028426  |
| Al | -1.499109 | -2.847636 | 1.233727  |
| Al | -0.985439 | -0.211637 | 2.116526  |
| Al | -0.842238 | -0.959979 | -0.536962 |
| Al | -0.548274 | -1.562586 | -3.123634 |
| Al | -0.088646 | 2.459856  | 2.161797  |
| Al | -0.036712 | 1.065134  | -2.227458 |
| Al | 0.184439  | -3.377551 | -1.028459 |
| Al | 0.499554  | 3.257132  | -0.529610 |
| Al | 0.897723  | 0.766607  | 0.350177  |
| Al | 1.144647  | -1.861069 | 1.150658  |
| Al | 1.685895  | 0.318691  | 2.862780  |
| Al | 1.730246  | -1.070352 | -1.532169 |
| Al | 2.636339  | 1.603303  | -1.495895 |
| Al | 2.639900  | 2.504072  | 1.245808  |
| Al | 3.369445  | -0.212507 | 0.600463  |
| Mg | -5.471072 | -1.361197 | -1.666467 |
| Mg | -4.780720 | 1.905423  | -0.556475 |
| Mg | -4.574476 | -3.582177 | 0.897265  |
| Mg | -3.412002 | -2.010240 | -4.431520 |
| Mg | -3.331977 | -1.683310 | 3.586144  |
| Mg | -3.326756 | 1.796971  | 2.720127  |
| Mg | -2.164459 | 3.352341  | -2.550163 |
| Mg | -2.074922 | 4.612724  | 0.771597  |
| Mg | -1.961654 | -5.602932 | -0.284347 |
| Mg | -1.454495 | 0.852733  | -5.017464 |
| Mg | -1.252298 | 4.382301  | 4.234144  |
| Mg | -1.242785 | -4.631640 | -3.577664 |
| Mg | -0.599649 | 0.958666  | 4.989954  |
| Mg | 0.155263  | -2.393828 | 4.083201  |
| Mg | 0.885358  | -4.943190 | 1.673130  |
| Mg | 1.255813  | 3.554417  | -3.628015 |
| Mg | 1.257782  | 5.325395  | 1.756190  |
| Mg | 2.013229  | 0.133120  | -4.423226 |
| Mg | 2.043278  | -3.373281 | -3.636518 |
| Mg | 2.160455  | 3.089674  | 4.337374  |
| Mg | 3.311322  | 4.668045  | -1.000121 |
| Mg | 3.445510  | -3.414256 | -0.327781 |
| Mg | 3.596734  | -2.243921 | 3.066318  |
| Mg | 4.757192  | -0.675186 | -2.248445 |
| Mg | 4.762564  | 1.073557  | 3.149874  |
| Mg | 5.476393  | 2.049737  | -0.139636 |

45  
Al20Mg25

|    |           |           |           |
|----|-----------|-----------|-----------|
| Al | -1.001919 | 0.907622  | -3.064614 |
| Al | 1.608280  | -0.294204 | -3.048996 |
| Al | 1.309435  | 2.558786  | -2.575660 |
| Al | -0.564660 | -1.612176 | -1.821357 |
| Al | 3.166587  | 0.976730  | -0.994150 |
| Al | -1.080474 | 2.915124  | -0.983669 |
| Al | 0.520243  | 0.752630  | -0.860001 |
| Al | -2.186242 | 0.348802  | -0.615526 |
| Al | 1.980211  | -1.563623 | -0.534464 |
| Al | -2.548854 | -2.305912 | 0.099509  |
| Al | 0.054697  | -3.542873 | 0.139622  |
| Al | 1.526201  | 2.969516  | 0.269025  |
| Al | -0.323542 | -1.016547 | 0.874113  |

|    |           |           |           |
|----|-----------|-----------|-----------|
| Al | -3.095090 | 2.344462  | 0.897141  |
| Al | -0.591977 | 1.649088  | 1.486744  |
| Al | 1.950767  | 0.439422  | 1.495691  |
| Al | -2.583266 | -0.234354 | 2.103933  |
| Al | 1.612051  | -2.272605 | 2.193467  |
| Al | -1.219810 | -2.740594 | 2.620033  |
| Al | -0.023533 | -0.246200 | 3.429731  |
| Mg | 0.850761  | 1.535593  | -5.553174 |
| Mg | -0.577493 | -1.641032 | -4.955498 |
| Mg | 3.993202  | 1.571828  | -4.000534 |
| Mg | -1.232001 | 3.934096  | -3.970081 |
| Mg | -3.522504 | -1.305846 | -2.905153 |
| Mg | 1.579092  | -3.646773 | -2.852614 |
| Mg | 4.479677  | -1.559228 | -2.432676 |
| Mg | -3.927407 | 2.198676  | -2.377257 |
| Mg | -1.899171 | -4.420616 | -2.226674 |
| Mg | 3.917535  | 4.036627  | -1.509395 |
| Mg | 0.682630  | 5.495504  | -1.445644 |
| Mg | -3.294405 | 5.099993  | -0.656418 |
| Mg | -5.137688 | -0.163918 | 0.242515  |
| Mg | 3.143140  | -4.353851 | 0.309672  |
| Mg | 4.608972  | -1.175495 | 1.142844  |
| Mg | -2.415424 | -5.293661 | 1.148931  |
| Mg | 4.387545  | 2.408383  | 1.591548  |
| Mg | -0.831790 | 4.723582  | 1.704669  |
| Mg | -4.425204 | -2.763675 | 2.600272  |
| Mg | 0.722112  | -5.274926 | 2.715025  |
| Mg | 1.423632  | 2.728244  | 3.617115  |
| Mg | -2.228345 | 2.208792  | 4.078859  |
| Mg | 3.059978  | -0.375908 | 4.313094  |
| Mg | -2.515817 | -1.206178 | 5.118369  |
| Mg | 0.649869  | -2.793306 | 5.191632  |

45

Al21Mg24

|    |           |           |           |
|----|-----------|-----------|-----------|
| Al | -2.344368 | 0.829958  | 0.242945  |
| Al | -2.320610 | 0.219352  | -2.537994 |
| Al | -2.293929 | -1.489581 | 1.910814  |
| Al | -2.247498 | -3.816528 | 0.331512  |
| Al | -1.513270 | 2.807314  | -1.586196 |
| Al | -1.493189 | 1.100499  | 2.917759  |
| Al | -1.374914 | -1.593633 | -0.716128 |
| Al | -0.070581 | 2.450591  | 0.845638  |
| Al | -0.024810 | 1.482407  | -3.715217 |
| Al | 0.006224  | -1.289434 | 3.635884  |
| Al | 0.013367  | 0.664150  | -1.240428 |
| Al | 0.018704  | -0.271682 | 1.220274  |
| Al | 0.047403  | -1.341296 | -3.065992 |
| Al | 0.071577  | -3.750998 | -1.355818 |
| Al | 0.126632  | -2.966714 | 1.332563  |
| Al | 1.380082  | 2.896800  | -1.571344 |
| Al | 1.391080  | 1.194684  | 2.944002  |
| Al | 1.526847  | -1.581603 | -0.677996 |
| Al | 2.306567  | 0.958078  | 0.272510  |
| Al | 2.341896  | 0.325598  | -2.514096 |
| Al | 2.376677  | -1.331508 | 1.967629  |
| Mg | -4.648214 | 2.100590  | -1.439908 |
| Mg | -4.620186 | 0.653454  | 2.383926  |
| Mg | -4.475207 | -1.481900 | -0.522631 |
| Mg | -2.915208 | 3.701413  | 1.333158  |
| Mg | -2.883653 | 2.658424  | -4.467480 |
| Mg | -2.842763 | -0.969669 | 4.973645  |
| Mg | -2.614575 | -3.185959 | -3.057270 |
| Mg | -1.771724 | -4.114664 | 3.560505  |
| Mg | -1.749464 | -0.555337 | -5.532361 |
| Mg | -0.152568 | 5.381882  | -0.267980 |
| Mg | -0.141258 | 3.914170  | 3.619700  |
| Mg | -0.112071 | -6.079150 | 0.812918  |
| Mg | -0.109709 | 4.675012  | -3.734912 |
| Mg | -0.091304 | 1.092315  | 5.757079  |
| Mg | 1.793803  | -0.422976 | -5.537237 |
| Mg | 1.833242  | -3.906354 | 3.787688  |
| Mg | 2.683452  | 3.866318  | 1.365826  |
| Mg | 2.742473  | -2.973801 | -3.176547 |
| Mg | 2.774739  | 2.804044  | -4.438874 |

|          |           |           |           |
|----------|-----------|-----------|-----------|
| Mg       | 2.810688  | -0.738928 | 5.044020  |
| Mg       | 2.894172  | -4.185311 | 0.352470  |
| Mg       | 4.528399  | 2.394829  | -1.403041 |
| Mg       | 4.545776  | 0.963552  | 2.465539  |
| Mg       | 4.597272  | -1.088409 | -0.518557 |
| 45       |           |           |           |
| Al22Mg23 |           |           |           |
| Al       | -3.209808 | 0.083866  | -1.551442 |
| Al       | -2.325699 | 2.543560  | -0.320209 |
| Al       | -2.257225 | 0.095977  | 1.125589  |
| Al       | -1.607451 | 2.001134  | -3.069812 |
| Al       | -1.516375 | -1.947484 | -0.653812 |
| Al       | -1.328890 | -2.408702 | 2.096948  |
| Al       | -1.069215 | -0.886444 | -3.257219 |
| Al       | -0.630685 | 0.604386  | -1.106352 |
| Al       | -0.433675 | 0.070595  | 3.321254  |
| Al       | -0.209543 | -3.479156 | -2.377067 |
| Al       | -0.136544 | 1.890939  | 1.213634  |
| Al       | 0.359049  | 3.112512  | -1.221342 |
| Al       | 0.401273  | -0.760928 | 0.903791  |
| Al       | 0.763550  | -3.333683 | 0.323491  |
| Al       | 0.819275  | 2.573288  | 3.541959  |
| Al       | 1.125422  | 1.031110  | -3.097821 |
| Al       | 1.209467  | -1.369605 | -1.660210 |
| Al       | 1.459612  | -2.085865 | 2.893994  |
| Al       | 2.049877  | 0.993033  | -0.468487 |
| Al       | 2.216842  | 3.158073  | 1.112741  |
| Al       | 2.232940  | 0.613924  | 2.309523  |
| Al       | 2.980020  | -1.477729 | 0.496491  |
| Mg       | -5.086286 | 1.352805  | 0.734773  |
| Mg       | -4.629133 | 2.777908  | -2.485787 |
| Mg       | -4.341489 | -2.216332 | 0.621021  |
| Mg       | -3.695516 | 0.159023  | -4.670314 |
| Mg       | -3.459469 | -0.798856 | 3.869937  |
| Mg       | -3.423017 | -2.969292 | -2.897244 |
| Mg       | -2.488268 | 2.617597  | 3.110756  |
| Mg       | -1.927483 | -4.963086 | 0.015597  |
| Mg       | -1.924676 | 5.079248  | -2.133523 |
| Mg       | -0.636481 | -2.445440 | 5.227165  |
| Mg       | -0.460132 | 4.957950  | 1.308389  |
| Mg       | -0.442991 | 0.874651  | -5.825630 |
| Mg       | 0.193760  | -5.035570 | 2.935086  |
| Mg       | 0.648893  | 3.917499  | -4.274985 |
| Mg       | 1.546695  | -1.903049 | -4.704685 |
| Mg       | 1.929300  | 0.093188  | 5.390604  |
| Mg       | 3.021096  | -3.896392 | -1.818883 |
| Mg       | 3.401887  | 3.319181  | -2.009045 |
| Mg       | 3.425173  | -4.335253 | 1.738013  |
| Mg       | 3.948126  | 2.836342  | 3.768910  |
| Mg       | 4.068307  | -0.364344 | -2.458972 |
| Mg       | 4.524865  | -1.300578 | 3.283275  |
| Mg       | 4.914621  | 1.220000  | 0.719902  |
| 45       |           |           |           |
| Al23Mg22 |           |           |           |
| Al       | -3.909725 | -2.615188 | -1.150359 |
| Al       | -3.138809 | -0.521262 | -2.913577 |
| Al       | -3.032020 | 2.044322  | -1.547519 |
| Al       | -3.017312 | -0.341883 | -0.181882 |
| Al       | -2.133733 | -2.807483 | 1.014986  |
| Al       | -2.111191 | -0.277992 | 2.478772  |
| Al       | -1.419939 | 1.753239  | 0.621167  |
| Al       | -1.320204 | -2.278540 | -1.744172 |
| Al       | -0.891869 | 0.475434  | -1.948006 |
| Al       | -0.467890 | -0.879226 | 0.392380  |
| Al       | -0.186659 | 3.117089  | -1.500110 |
| Al       | 0.182119  | -2.051969 | 2.684731  |
| Al       | 0.482732  | 0.756859  | 2.390326  |
| Al       | 0.598729  | -3.317891 | 0.097848  |
| Al       | 0.791203  | 3.304917  | 1.247981  |
| Al       | 1.123948  | 1.102760  | -0.259078 |
| Al       | 1.302035  | -1.268817 | -1.775999 |
| Al       | 1.552033  | 1.316005  | -2.904529 |
| Al       | 2.200513  | -1.150810 | 0.886153  |
| Al       | 2.518241  | -0.552989 | 3.444028  |

|    |           |           |           |
|----|-----------|-----------|-----------|
| Al | 2.669944  | 3.076294  | -0.938833 |
| Al | 3.071519  | 1.498283  | 1.504675  |
| Al | 3.533813  | 0.307892  | -1.078012 |
| Mg | -5.818165 | 0.149781  | -1.444289 |
| Mg | -5.003427 | -1.723485 | 1.805467  |
| Mg | -4.427539 | 1.912295  | 1.484694  |
| Mg | -3.044695 | -3.466580 | -4.087485 |
| Mg | -2.508767 | -2.885757 | 4.179969  |
| Mg | -2.203846 | 4.725313  | 0.302180  |
| Mg | -1.926523 | -5.248568 | -0.944591 |
| Mg | -1.550536 | 2.835279  | 3.562015  |
| Mg | -1.449960 | 2.310058  | -4.357557 |
| Mg | -0.480000 | -5.158635 | 2.397077  |
| Mg | -0.251042 | -1.054903 | -4.579544 |
| Mg | -0.240924 | -0.251752 | 5.246468  |
| Mg | 0.897697  | -4.162035 | -2.971414 |
| Mg | 1.125240  | 5.850561  | -0.581996 |
| Mg | 1.745463  | 4.315737  | -3.732470 |
| Mg | 2.088050  | 2.628374  | 4.282961  |
| Mg | 2.860530  | -3.713658 | 2.530563  |
| Mg | 3.500285  | -0.903914 | -4.011647 |
| Mg | 3.622832  | 4.616029  | 1.693836  |
| Mg | 3.775218  | -3.050821 | -1.009719 |
| Mg | 5.225316  | -0.806003 | 1.571304  |
| Mg | 5.667317  | 2.393638  | -0.156795 |

45

Al<sub>24</sub>Mg<sub>21</sub>

|    |           |           |           |
|----|-----------|-----------|-----------|
| Al | -1.816035 | 1.225802  | -3.813268 |
| Al | 0.675195  | -0.168124 | -3.406173 |
| Al | 0.192175  | -2.681122 | -1.974554 |
| Al | -1.732232 | -0.619698 | -1.927590 |
| Al | 2.861063  | -1.445713 | -1.810854 |
| Al | -0.289016 | 1.991942  | -1.804586 |
| Al | 2.478700  | 1.472635  | -1.774983 |
| Al | -3.066986 | 1.804240  | -1.278186 |
| Al | 0.727368  | -0.323394 | -0.776992 |
| Al | -3.609390 | -0.672134 | 0.176555  |
| Al | -1.354094 | 3.434216  | 0.366828  |
| Al | -1.183200 | -2.026138 | 0.410206  |
| Al | -1.356790 | 0.757268  | 0.427945  |
| Al | 1.549131  | -2.542500 | 0.503550  |
| Al | 4.180786  | -2.285090 | 0.585838  |
| Al | 1.085297  | 2.106477  | 0.607786  |
| Al | 2.987379  | 0.075588  | 0.629032  |
| Al | -3.356579 | 1.804067  | 1.688612  |
| Al | 0.540098  | -0.349088 | 1.940940  |
| Al | -2.077917 | -0.601610 | 2.675690  |
| Al | -0.028413 | -2.806575 | 2.770835  |
| Al | -0.687150 | 1.940285  | 2.793341  |
| Al | 2.666906  | -1.562443 | 2.875846  |
| Al | 2.269842  | 1.382552  | 2.970223  |
| Mg | -1.559419 | -1.955402 | -4.731748 |
| Mg | 1.984908  | -2.848602 | -4.537337 |
| Mg | 1.041556  | 2.766126  | -4.506651 |
| Mg | 3.683334  | 0.239104  | -4.389909 |
| Mg | -4.640793 | -0.324745 | -2.989285 |
| Mg | -2.060886 | 4.385699  | -2.739316 |
| Mg | -3.069630 | -3.436086 | -1.642817 |
| Mg | 2.893020  | -4.575013 | -1.436553 |
| Mg | 1.348277  | 4.601033  | -1.253745 |
| Mg | 5.500962  | 0.168612  | -1.208576 |
| Mg | -5.948409 | 1.492786  | -0.085858 |
| Mg | -0.342208 | -5.040730 | 0.318799  |
| Mg | 4.080704  | 3.017060  | 0.704915  |
| Mg | -3.275163 | -3.464007 | 2.171640  |
| Mg | 2.723399  | -4.669794 | 2.445546  |
| Mg | 1.091237  | 4.514989  | 2.544576  |
| Mg | 5.331458  | 0.081092  | 2.673238  |
| Mg | -5.238036 | -0.481826 | 2.870055  |
| Mg | -2.533350 | 4.534197  | 3.056174  |
| Mg | -2.984663 | 1.455323  | 4.877122  |
| Mg | 0.317565  | -0.371259 | 5.003688  |

45

Al<sub>25</sub>Mg<sub>20</sub>



|    |           |           |           |
|----|-----------|-----------|-----------|
| Al | 0.194112  | 0.938315  | -4.345361 |
| Al | 0.708384  | -1.821878 | -3.419672 |
| Al | -1.912304 | -0.717780 | -3.386028 |
| Al | 2.575419  | 0.313533  | -2.803177 |
| Al | -1.751012 | 2.069603  | -2.591788 |
| Al | 1.025058  | 2.723541  | -2.194859 |
| Al | 0.060874  | 0.224199  | -1.856215 |
| Al | 0.943504  | -3.984887 | -1.536789 |
| Al | -1.022141 | -2.244401 | -1.217104 |
| Al | 1.883955  | -1.610214 | -0.870281 |
| Al | -2.522578 | 0.093176  | -0.721369 |
| Al | 2.090318  | 1.087563  | -0.174225 |
| Al | -0.653138 | 2.136943  | -0.079418 |
| Al | -0.103248 | -0.501269 | 0.634103  |
| Al | 1.455960  | 3.588397  | 0.716126  |
| Al | 0.438305  | -3.075152 | 1.136364  |
| Al | -2.271601 | -1.962979 | 1.291768  |
| Al | 2.344067  | -0.950115 | 1.812358  |
| Al | -2.042397 | 0.847985  | 1.916881  |
| Al | 0.816209  | 1.414540  | 2.226290  |
| Al | -1.036858 | 3.378808  | 2.283871  |
| Al | -0.193290 | -1.186015 | 3.158800  |
| Al | -2.725496 | -0.815438 | 3.854810  |
| Al | -0.824490 | 1.253191  | 4.332864  |
| Al | 1.788375  | 0.160341  | 4.345533  |
| Mg | 2.420805  | -0.747512 | -5.815817 |
| Mg | 2.807457  | 2.719428  | -4.814534 |
| Mg | -0.499110 | 4.039037  | -4.661036 |
| Mg | -1.537004 | -3.987952 | -3.757743 |
| Mg | 3.667531  | -2.852143 | -3.091716 |
| Mg | -4.635724 | 0.853516  | -2.937410 |
| Mg | -4.113621 | -2.495682 | -1.470385 |
| Mg | 4.038683  | 3.140536  | -1.394562 |
| Mg | -0.872654 | 5.053889  | -1.001898 |
| Mg | 4.779790  | -0.489753 | -0.420291 |
| Mg | -1.799234 | -4.995464 | 0.042936  |
| Mg | -3.637388 | 2.998806  | 0.119766  |
| Mg | 3.450886  | -3.845061 | 0.645141  |
| Mg | -4.934742 | -0.269197 | 1.455798  |
| Mg | 3.905437  | 1.849941  | 2.344551  |
| Mg | -1.575857 | -3.941401 | 3.630846  |
| Mg | -3.733120 | 2.405386  | 3.995590  |
| Mg | 2.062654  | -3.151993 | 4.036088  |
| Mg | 1.448446  | 3.581982  | 4.317335  |
| Mg | -0.509224 | -1.226370 | 6.263859  |

45

Al<sub>26</sub>Mg<sub>19</sub>

|    |           |           |           |
|----|-----------|-----------|-----------|
| Al | -2.665399 | 1.495521  | -2.235671 |
| Al | -2.548803 | 1.781413  | 2.512539  |
| Al | -2.514332 | -2.472594 | 0.292307  |
| Al | -2.478021 | 0.374453  | 0.148061  |
| Al | -1.759944 | -0.863647 | 2.494524  |
| Al | -1.510859 | -1.137330 | -2.078557 |
| Al | -1.413250 | 3.055354  | -0.104405 |
| Al | -0.934842 | 2.257802  | -4.010406 |
| Al | -0.429527 | -1.941757 | 4.529526  |
| Al | -0.303534 | -3.234579 | 1.958161  |
| Al | -0.294085 | 0.888573  | 4.116526  |
| Al | -0.178215 | -1.136534 | 0.264704  |
| Al | -0.168382 | 1.269651  | 1.455705  |
| Al | -0.132022 | -3.477261 | -0.940583 |
| Al | -0.083728 | 1.079161  | -1.375631 |
| Al | 0.107218  | -2.648264 | -3.593808 |
| Al | 0.462302  | 0.058274  | -3.827338 |
| Al | 0.550478  | 3.498555  | -2.241573 |
| Al | 1.100138  | -0.933843 | 2.633331  |
| Al | 1.551425  | 2.928682  | 0.201319  |
| Al | 1.552149  | -1.319967 | -1.790223 |
| Al | 2.170823  | -2.567398 | 0.628066  |
| Al | 2.174152  | 0.281751  | 0.317974  |
| Al | 2.192905  | 1.599522  | 2.750806  |
| Al | 2.482314  | 1.335150  | -2.157626 |
| Al | 3.707858  | -0.765577 | 2.235399  |
| Mg | -4.828463 | -0.623591 | 1.943159  |

|    |           |           |           |
|----|-----------|-----------|-----------|
| Mg | -4.651129 | -0.999998 | -1.697455 |
| Mg | -4.553933 | 2.732041  | 0.119427  |
| Mg | -3.086165 | -3.561080 | 3.366106  |
| Mg | -3.083637 | -0.075189 | 5.208059  |
| Mg | -2.736644 | -3.979188 | -2.621245 |
| Mg | -2.454476 | -0.439933 | -4.950569 |
| Mg | -2.432434 | 4.679618  | -2.608775 |
| Mg | -0.114652 | 3.971767  | 2.928295  |
| Mg | 0.202296  | 5.785983  | -0.112629 |
| Mg | 1.362140  | -5.639431 | 0.824834  |
| Mg | 2.045232  | 2.625030  | -4.989775 |
| Mg | 2.418902  | -3.533988 | 3.702036  |
| Mg | 2.442696  | -0.304863 | 5.354157  |
| Mg | 2.685735  | -4.185968 | -2.216791 |
| Mg | 3.297579  | -1.091099 | -4.351999 |
| Mg | 3.560466  | 4.299526  | -1.849897 |
| Mg | 4.637317  | -1.138074 | -0.947173 |
| Mg | 4.652353  | 2.073329  | 0.717108  |

45

Al27Mg18

|    |           |           |           |
|----|-----------|-----------|-----------|
| Al | -1.326734 | -1.164543 | -3.922735 |
| Al | -2.958150 | 1.024801  | -2.882415 |
| Al | 1.678771  | 2.788595  | -2.750694 |
| Al | -0.270953 | 0.915225  | -2.485523 |
| Al | -1.222147 | 3.402635  | -2.255915 |
| Al | 0.637876  | -1.686857 | -2.068669 |
| Al | -1.492539 | -3.447947 | -2.036864 |
| Al | 2.275579  | 0.467717  | -1.432519 |
| Al | -2.028191 | -0.951574 | -1.341660 |
| Al | 1.113600  | -4.044057 | -0.957574 |
| Al | -4.275957 | 0.064671  | -0.389555 |
| Al | 0.529190  | 2.586318  | -0.346111 |
| Al | -2.116126 | 1.694463  | -0.316022 |
| Al | 3.237079  | 2.756731  | -0.175694 |
| Al | -0.003941 | -0.053424 | 0.043191  |
| Al | -3.336479 | -2.723894 | 0.122246  |
| Al | 4.281666  | 0.012836  | 0.326849  |
| Al | 2.100938  | -1.763895 | 0.365494  |
| Al | -0.635789 | -2.653125 | 0.487377  |
| Al | 2.026761  | 0.932049  | 1.357408  |
| Al | -2.270230 | -0.531581 | 1.490713  |
| Al | -0.634971 | 1.726730  | 2.036395  |
| Al | 1.496471  | 3.466409  | 2.061210  |
| Al | 0.360774  | -1.076171 | 2.528368  |
| Al | 3.063664  | -0.974830 | 2.868823  |
| Al | 1.322640  | 1.144933  | 3.899222  |
| Al | -1.397031 | 0.202182  | 4.064249  |
| Mg | -0.992104 | 2.092866  | -5.217598 |
| Mg | 1.835508  | -0.071149 | -4.574354 |
| Mg | 0.667205  | -3.831901 | -4.295705 |
| Mg | -4.389229 | -2.026113 | -2.979140 |
| Mg | 4.871166  | 1.633724  | -2.613193 |
| Mg | 3.781129  | -2.251574 | -2.223400 |
| Mg | -4.505874 | 3.315584  | -1.389141 |
| Mg | 1.546955  | 5.426804  | -0.862906 |
| Mg | -1.606218 | -5.584041 | 0.275556  |
| Mg | -1.501029 | 4.607021  | 0.906253  |
| Mg | 4.826531  | -3.026960 | 1.175245  |
| Mg | -5.148452 | -1.337764 | 2.354375  |
| Mg | -3.796713 | 2.040893  | 2.393707  |
| Mg | 1.521094  | -4.050251 | 2.416792  |
| Mg | 4.394440  | 2.097766  | 2.921247  |
| Mg | -2.044875 | -3.051821 | 3.326227  |
| Mg | -0.694615 | 3.459738  | 4.596650  |
| Mg | 1.079311  | -1.557217 | 5.499792  |

45

Al28Mg17

|    |           |           |           |
|----|-----------|-----------|-----------|
| Al | -3.052190 | -2.667598 | 2.652979  |
| Al | -2.963216 | 1.864249  | 1.501948  |
| Al | -2.936803 | -2.172243 | -1.815028 |
| Al | -2.839165 | -0.846580 | 0.625833  |
| Al | -2.243776 | -0.168854 | 3.443205  |
| Al | -1.999977 | -0.202181 | -3.222338 |
| Al | -1.891928 | -3.461867 | 0.264987  |

|                                   |           |           |           |
|-----------------------------------|-----------|-----------|-----------|
| Al                                | -1.731242 | 1.440954  | -1.005590 |
| Al                                | -0.837682 | 2.251131  | 3.484268  |
| Al                                | -0.680348 | 0.528678  | 1.424926  |
| Al                                | -0.591972 | -3.615727 | -2.071355 |
| Al                                | -0.534545 | -2.062832 | 2.091080  |
| Al                                | -0.526378 | 3.243694  | 0.888858  |
| Al                                | -0.513071 | -1.099438 | -0.891692 |
| Al                                | 0.215117  | 3.540381  | -1.753194 |
| Al                                | 0.304018  | 1.081351  | -2.958033 |
| Al                                | 0.403659  | -1.582510 | -3.473810 |
| Al                                | 0.637478  | -0.177323 | 3.746514  |
| Al                                | 0.983920  | 1.307664  | -0.427909 |
| Al                                | 1.030727  | -3.171756 | 0.070065  |
| Al                                | 1.606878  | 1.929039  | 2.183541  |
| Al                                | 1.683789  | -0.794147 | 1.177258  |
| Al                                | 2.225176  | -0.828770 | -1.529248 |
| Al                                | 2.265012  | 3.609004  | 0.120372  |
| Al                                | 2.506999  | 0.097937  | -4.058559 |
| Al                                | 2.831803  | 2.074858  | -2.158169 |
| Al                                | 3.376106  | 0.113352  | 3.004992  |
| Al                                | 3.589307  | 1.012497  | 0.323583  |
| Mg                                | -5.254826 | -0.198426 | 2.521691  |
| Mg                                | -5.104175 | -3.119751 | 0.274291  |
| Mg                                | -4.693117 | 0.575414  | -1.458270 |
| Mg                                | -2.964742 | 4.312856  | -0.706303 |
| Mg                                | -2.131715 | -2.977864 | -4.800784 |
| Mg                                | -2.124605 | 2.913436  | -3.863989 |
| Mg                                | -1.020084 | -2.535736 | 5.178970  |
| Mg                                | -0.403061 | -5.163741 | 2.375275  |
| Mg                                | -0.216384 | 0.262818  | -5.946085 |
| Mg                                | 1.114765  | 4.929694  | 2.936980  |
| Mg                                | 1.579729  | 3.293740  | -4.750410 |
| Mg                                | 1.997902  | 2.189456  | 5.266524  |
| Mg                                | 2.271485  | -2.969323 | 3.341460  |
| Mg                                | 2.600535  | -3.714632 | -2.694351 |
| Mg                                | 4.343745  | -2.172412 | 0.505458  |
| Mg                                | 4.487386  | 3.153819  | 2.459697  |
| Mg                                | 5.199470  | -0.022313 | -2.279641 |
| 45                                |           |           |           |
| Al <sub>29</sub> Mg <sub>16</sub> |           |           |           |
| Al                                | -4.211554 | -0.329371 | 0.665953  |
| Al                                | -3.649929 | 1.929074  | -1.210887 |
| Al                                | -3.181975 | -2.804822 | -0.594966 |
| Al                                | -2.666565 | 0.063699  | 3.328201  |
| Al                                | -2.295833 | -0.356605 | -1.255835 |
| Al                                | -2.136519 | 0.854045  | -3.607732 |
| Al                                | -2.094001 | 1.388180  | 0.978951  |
| Al                                | -1.933812 | -2.068447 | -3.261326 |
| Al                                | -1.802838 | -1.428970 | 1.242520  |
| Al                                | -1.102386 | 2.604952  | 3.227807  |
| Al                                | -1.061540 | -3.978604 | 1.209846  |
| Al                                | -0.931872 | 2.168533  | -1.472016 |
| Al                                | -0.704024 | -2.203201 | 3.583573  |
| Al                                | -0.419195 | -2.539979 | -1.036683 |
| Al                                | -0.072280 | 0.238693  | 2.602666  |
| Al                                | 0.038571  | 0.024502  | -0.079163 |
| Al                                | 0.138897  | -0.339139 | -2.714412 |
| Al                                | 0.452869  | 2.561319  | 0.967623  |
| Al                                | 0.627739  | 2.095592  | -3.694581 |
| Al                                | 0.945545  | -2.117171 | 1.376158  |
| Al                                | 1.818974  | 1.581912  | -1.300490 |
| Al                                | 1.847272  | 1.957770  | 3.331769  |
| Al                                | 2.148023  | -0.980506 | 3.565648  |
| Al                                | 2.166936  | -1.384505 | -1.060605 |
| Al                                | 2.314776  | 0.368670  | 1.217044  |
| Al                                | 2.772469  | 0.062590  | -3.277927 |
| Al                                | 3.161013  | 2.847424  | 0.744798  |
| Al                                | 3.670518  | -1.915940 | 1.168811  |
| Al                                | 4.206319  | 0.459843  | -0.636700 |
| Mg                                | -4.977860 | -0.797104 | -2.616858 |
| Mg                                | -4.622290 | 2.441973  | 2.313974  |
| Mg                                | -3.917687 | -3.010577 | 2.727507  |
| Mg                                | -2.245407 | 3.989313  | -3.570015 |
| Mg                                | -2.098856 | 4.454280  | 0.486158  |

|    |           |           |           |
|----|-----------|-----------|-----------|
| Mg | -1.664297 | -5.208179 | -1.924813 |
| Mg | -0.155459 | 0.424778  | 5.625513  |
| Mg | -0.047629 | -0.335805 | -5.760946 |
| Mg | 1.152065  | 4.616347  | -1.407160 |
| Mg | 1.299474  | 4.976707  | 2.672666  |
| Mg | 1.333089  | -3.038942 | -3.688542 |
| Mg | 1.834184  | -4.211689 | 3.403062  |
| Mg | 2.003343  | -4.514943 | -0.289823 |
| Mg | 4.167474  | 2.950993  | -2.688355 |
| Mg | 4.935822  | 0.770600  | 2.703009  |
| Mg | 4.958433  | -2.267291 | -1.993421 |

45

Al30Mg15

|    |           |           |           |
|----|-----------|-----------|-----------|
| Al | -3.906299 | 1.747927  | 0.210282  |
| Al | -3.520629 | -0.482250 | 2.394052  |
| Al | -3.461204 | 0.579324  | -2.515775 |
| Al | -2.827631 | -3.082718 | 1.070689  |
| Al | -2.657179 | -0.651187 | -0.195494 |
| Al | -1.813835 | 3.863667  | 0.572589  |
| Al | -1.641290 | 1.364873  | 1.683575  |
| Al | -1.584233 | 1.819033  | -1.118815 |
| Al | -1.184870 | 0.227202  | 4.134076  |
| Al | -1.029540 | -1.387308 | 2.021431  |
| Al | -1.013722 | -0.647678 | -2.523061 |
| Al | -0.985930 | 1.893105  | -3.729927 |
| Al | -0.666012 | -2.657398 | -0.554765 |
| Al | -0.047378 | -0.038696 | -0.031070 |
| Al | 0.008493  | -3.854843 | 1.899679  |
| Al | 0.021553  | 3.900950  | -1.795822 |
| Al | 0.608030  | 2.588580  | 0.535820  |
| Al | 0.948762  | 0.619167  | 2.464664  |
| Al | 1.005303  | -1.786067 | 3.773977  |
| Al | 1.009874  | 1.387742  | -2.019102 |
| Al | 1.155313  | -0.198343 | -4.137752 |
| Al | 1.564933  | -1.820240 | 1.122783  |
| Al | 1.595371  | -1.397850 | -1.709136 |
| Al | 1.791021  | -3.872481 | -0.539321 |
| Al | 2.573131  | 0.560044  | 0.117338  |
| Al | 2.884048  | 3.020165  | -0.953265 |
| Al | 2.936918  | 2.439462  | 1.972033  |
| Al | 3.485117  | -0.453566 | 2.448774  |
| Al | 3.510829  | 0.453532  | -2.412281 |
| Al | 3.894992  | -1.767256 | -0.237635 |
| Mg | -5.675492 | -0.971648 | 0.009740  |
| Mg | -3.839646 | 2.621302  | 3.355805  |
| Mg | -3.368284 | -2.830356 | -2.294892 |
| Mg | -3.335332 | 3.937916  | -2.401880 |
| Mg | -2.141206 | -2.966683 | 4.360687  |
| Mg | -2.016412 | -0.534870 | -5.425375 |
| Mg | -1.124173 | -5.690508 | -0.375991 |
| Mg | -0.062807 | 3.431436  | 3.514886  |
| Mg | 0.182256  | -3.451280 | -3.556070 |
| Mg | 1.493793  | 5.491001  | 0.647101  |
| Mg | 2.195336  | 3.025111  | -4.267031 |
| Mg | 2.294080  | 0.866891  | 5.175723  |
| Mg | 3.382516  | -3.836614 | 2.453149  |
| Mg | 3.830639  | -2.632779 | -3.366061 |
| Mg | 5.530794  | 1.174188  | 0.221670  |

45

Al31mg14

|    |           |           |           |
|----|-----------|-----------|-----------|
| Al | -3.766442 | -0.914894 | 1.876551  |
| Al | -3.664753 | 1.963816  | 1.092859  |
| Al | -3.103155 | 2.211344  | -1.990413 |
| Al | -2.842775 | -0.507758 | -3.194592 |
| Al | -2.691489 | -0.062699 | -0.495271 |
| Al | -1.570654 | 0.572094  | 2.078350  |
| Al | -1.502427 | -1.583738 | 3.703468  |
| Al | -1.453740 | -2.093285 | 0.998981  |
| Al | -1.321172 | 3.222926  | 2.519642  |
| Al | -1.245997 | 2.357966  | -0.037652 |
| Al | -0.952035 | -1.872137 | -1.755530 |
| Al | -0.758242 | 0.930183  | -2.381945 |
| Al | -0.564058 | -4.246109 | -0.443647 |
| Al | -0.444633 | 3.609284  | -2.292770 |

|    |           |           |           |
|----|-----------|-----------|-----------|
| Al | -0.064285 | -0.949869 | -4.192233 |
| Al | 0.000010  | 0.000006  | 0.000004  |
| Al | 0.064143  | 0.949848  | 4.192243  |
| Al | 0.444696  | -3.609285 | 2.292694  |
| Al | 0.564137  | 4.246126  | 0.443640  |
| Al | 0.758179  | -0.930154 | 2.381940  |
| Al | 0.952022  | 1.872150  | 1.755537  |
| Al | 1.246043  | -2.357886 | 0.037646  |
| Al | 1.321212  | -3.222916 | -2.519586 |
| Al | 1.453734  | 2.093293  | -0.998991 |
| Al | 1.502311  | 1.583763  | -3.703523 |
| Al | 1.570599  | -0.572052 | -2.078381 |
| Al | 2.691501  | 0.062737  | 0.495278  |
| Al | 2.842691  | 0.507788  | 3.194651  |
| Al | 3.103117  | -2.211283 | 1.990491  |
| Al | 3.664766  | -1.963693 | -1.092953 |
| Al | 3.766394  | 0.914938  | -1.876623 |
| Mg | -5.644528 | 0.431924  | -0.993439 |
| Mg | -3.795229 | -2.999270 | -0.932041 |
| Mg | -3.319816 | 1.246151  | 4.443086  |
| Mg | -2.711025 | -4.380733 | 2.548214  |
| Mg | -2.690721 | 5.006728  | -0.088139 |
| Mg | -1.586084 | 2.010272  | -5.075261 |
| Mg | -1.521880 | -3.856629 | -3.980464 |
| Mg | 1.522089  | 3.856334  | 3.980670  |
| Mg | 1.585919  | -2.010316 | 5.075264  |
| Mg | 2.690874  | -5.006619 | 0.088137  |
| Mg | 2.711280  | 4.380532  | -2.548278 |
| Mg | 3.319650  | -1.246157 | -4.443182 |
| Mg | 3.795241  | 2.999276  | 0.932045  |
| Mg | 5.644530  | -0.431998 | 0.993519  |

45

Al<sub>32</sub>Mg<sub>13</sub>

|    |           |           |           |
|----|-----------|-----------|-----------|
| Al | 0.144042  | -1.422337 | -3.537339 |
| Al | -2.358401 | -0.305268 | -3.252930 |
| Al | 2.326299  | 0.255726  | -3.193044 |
| Al | -2.658631 | 2.295587  | -2.728877 |
| Al | 2.115917  | 2.889216  | -2.584873 |
| Al | -0.423534 | 3.783326  | -2.539024 |
| Al | -0.164922 | 1.077248  | -1.900076 |
| Al | 0.380358  | -3.731669 | -1.592569 |
| Al | -1.211872 | -1.510805 | -1.174978 |
| Al | 1.434044  | -1.253989 | -1.170183 |
| Al | -3.836829 | -1.954964 | -0.755115 |
| Al | 4.072980  | -1.023853 | -0.678907 |
| Al | -2.751428 | 0.569382  | -0.614341 |
| Al | 2.351483  | 1.121005  | -0.564332 |
| Al | -1.713748 | 2.963462  | -0.265605 |
| Al | 0.928639  | 3.364467  | -0.185842 |
| Al | -1.990109 | -3.837909 | 0.088999  |
| Al | 3.605274  | 3.349325  | 0.109091  |
| Al | 2.718828  | -3.293374 | 0.146125  |
| Al | -0.149650 | 0.614981  | 0.820922  |
| Al | 0.232127  | -2.515118 | 0.863748  |
| Al | -4.586325 | -0.186753 | 1.202202  |
| Al | 4.366497  | 0.957410  | 1.244574  |
| Al | -2.138595 | -1.280847 | 1.438382  |
| Al | 2.234692  | -0.756274 | 1.482515  |
| Al | -2.510174 | 1.473887  | 2.010155  |
| Al | 1.937661  | 2.031556  | 2.052969  |
| Al | -0.544873 | 3.456413  | 2.079494  |
| Al | -1.250112 | -3.535513 | 2.810348  |
| Al | 1.880649  | -3.162739 | 2.839338  |
| Al | 0.055419  | -1.197992 | 3.216620  |
| Al | -0.245945 | 1.344126  | 3.598375  |
| Mg | -0.151687 | 1.579253  | -4.938448 |
| Mg | -2.408928 | -3.570407 | -3.216388 |
| Mg | 3.116491  | -2.940294 | -3.170629 |
| Mg | -5.367096 | 0.380864  | -2.290723 |
| Mg | 5.104203  | 1.620394  | -2.105665 |
| Mg | -0.814734 | 5.965236  | -0.113010 |
| Mg | -4.805950 | 2.879703  | 0.140177  |
| Mg | 0.594702  | -5.624698 | 1.076190  |
| Mg | -4.439292 | -3.317610 | 2.127648  |

|                                   |           |           |           |
|-----------------------------------|-----------|-----------|-----------|
| Mg                                | 2.101570  | 5.206333  | 2.200783  |
| Mg                                | 4.940959  | -2.149352 | 2.219733  |
| Mg                                | -2.870389 | -0.651777 | 4.378779  |
| Mg                                | 2.750394  | 0.044643  | 4.425730  |
| 45                                |           |           |           |
| Al <sub>33</sub> Mg <sub>12</sub> |           |           |           |
| Al                                | -1.627069 | 0.631425  | -3.418865 |
| Al                                | 1.032447  | 2.211623  | -3.289508 |
| Al                                | -1.048769 | -2.075292 | -3.223724 |
| Al                                | 3.208675  | 0.392050  | -2.806761 |
| Al                                | 2.296694  | -2.242927 | -2.786437 |
| Al                                | 0.593451  | -0.257208 | -2.175229 |
| Al                                | 3.410870  | 3.121906  | -2.131079 |
| Al                                | -3.343291 | 1.683653  | -1.539749 |
| Al                                | -2.027593 | -3.696322 | -1.292697 |
| Al                                | -0.724792 | 1.843379  | -1.153620 |
| Al                                | 0.946249  | 4.068049  | -1.128429 |
| Al                                | 0.349084  | -2.492097 | -0.849940 |
| Al                                | -1.910514 | -0.748865 | -0.764444 |
| Al                                | 1.862549  | 1.517490  | -0.692632 |
| Al                                | 2.747079  | -3.718991 | -0.482835 |
| Al                                | 4.510467  | 1.156884  | -0.459645 |
| Al                                | 2.620327  | -0.998664 | -0.248347 |
| Al                                | -1.565399 | 4.075680  | 0.083186  |
| Al                                | 0.360360  | -4.892051 | 0.259784  |
| Al                                | -3.825206 | -2.470589 | 0.303333  |
| Al                                | -4.424118 | 0.157125  | 0.359259  |
| Al                                | 3.065270  | 3.525728  | 0.617100  |
| Al                                | 0.160210  | -0.268176 | 0.998514  |
| Al                                | -2.176486 | 1.558715  | 1.033053  |
| Al                                | -1.291633 | -2.989264 | 1.220632  |
| Al                                | 0.469535  | 2.527313  | 1.342058  |
| Al                                | 1.431032  | -2.670619 | 1.730860  |
| Al                                | 2.889928  | 1.041425  | 1.735720  |
| Al                                | -2.582984 | -0.818588 | 2.103458  |
| Al                                | -1.569004 | 3.533918  | 2.765983  |
| Al                                | -0.749727 | 0.936395  | 3.342233  |
| Al                                | 1.630786  | -0.481847 | 3.410163  |
| Al                                | -0.602601 | -1.846423 | 3.572046  |
| Mg                                | 1.018554  | -0.419110 | -5.230718 |
| Mg                                | -1.680059 | 3.986469  | -3.203160 |
| Mg                                | 0.563719  | -4.908079 | -2.920197 |
| Mg                                | -4.223274 | -1.321431 | -2.721879 |
| Mg                                | 5.279721  | -1.825839 | -1.636801 |
| Mg                                | -4.611322 | 3.482478  | 0.818999  |
| Mg                                | 0.779204  | 5.618267  | 1.704109  |
| Mg                                | 4.459681  | -1.733739 | 2.125180  |
| Mg                                | -3.483848 | -3.533000 | 3.391954  |
| Mg                                | 0.012278  | -4.963129 | 3.418770  |
| Mg                                | -3.957819 | 1.508600  | 3.667139  |
| Mg                                | 1.727339  | 2.793680  | 4.153164  |
| 45                                |           |           |           |
| Al <sub>34</sub> Mg <sub>11</sub> |           |           |           |
| Al                                | -4.490583 | -0.005669 | -0.312544 |
| Al                                | -3.604835 | 0.662307  | 2.091391  |
| Al                                | -3.579216 | 2.474886  | -0.042517 |
| Al                                | -3.548568 | -1.996083 | -1.687792 |
| Al                                | -2.309281 | -1.268593 | 3.375352  |
| Al                                | -2.254975 | 3.412521  | -2.137505 |
| Al                                | -2.123175 | -3.851215 | -0.205088 |
| Al                                | -2.112883 | 0.597386  | -1.712695 |
| Al                                | -2.074787 | -1.209679 | 0.547930  |
| Al                                | -1.360070 | 1.187649  | 3.653141  |
| Al                                | -1.323963 | 4.131476  | 0.232652  |
| Al                                | -1.254755 | 1.467458  | 0.920828  |
| Al                                | -1.016836 | -3.276593 | 2.345736  |
| Al                                | -0.993202 | -2.216463 | -2.212258 |
| Al                                | -0.894701 | 2.081191  | -3.898796 |
| Al                                | 0.041459  | 3.308745  | 2.501319  |
| Al                                | 0.183536  | -0.675041 | 2.129600  |
| Al                                | 0.195571  | -0.316626 | -0.671905 |
| Al                                | 0.213243  | 2.302007  | -1.330442 |
| Al                                | 0.336245  | -2.899031 | 0.112810  |
| Al                                | 0.419205  | -0.131584 | -3.371800 |

|    |           |           |           |
|----|-----------|-----------|-----------|
| Al | 1.276614  | 1.363807  | 3.801543  |
| Al | 1.335986  | 4.236864  | 0.381632  |
| Al | 1.602141  | 1.465223  | 0.971338  |
| Al | 1.819819  | -2.227456 | -2.172135 |
| Al | 1.826095  | 2.265589  | -3.505951 |
| Al | 1.833445  | -2.933608 | 2.445354  |
| Al | 2.448360  | -1.233904 | 0.466845  |
| Al | 2.595596  | 0.434702  | -1.698001 |
| Al | 2.885190  | -3.799456 | -0.162992 |
| Al | 3.008124  | -0.313514 | 2.856388  |
| Al | 3.086642  | 2.906515  | -1.019941 |
| Al | 4.264060  | 0.727064  | 0.468374  |
| Al | 4.358720  | -1.618026 | -1.339946 |
| Mg | -4.741535 | 1.638336  | -3.037006 |
| Mg | -4.595118 | -2.671591 | 1.561687  |
| Mg | -3.119402 | 3.743450  | 2.862514  |
| Mg | -2.521981 | -0.700250 | -4.564532 |
| Mg | 0.387867  | -5.094877 | -2.124074 |
| Mg | 0.473190  | -1.530190 | 5.064498  |
| Mg | 0.482914  | 5.090444  | -2.624058 |
| Mg | 0.685916  | -5.758706 | 1.327994  |
| Mg | 3.421886  | -0.602930 | -4.476057 |
| Mg | 3.614991  | 3.214294  | 2.488021  |
| Mg | 5.123053  | -2.380829 | 1.701090  |

45

Al35Mg10

|    |           |           |           |
|----|-----------|-----------|-----------|
| Al | -4.690567 | 0.627256  | 1.188647  |
| Al | -4.341248 | 0.640963  | -1.454832 |
| Al | -3.659290 | -1.630118 | 0.012882  |
| Al | -2.973032 | 1.770668  | 2.874614  |
| Al | -2.890834 | -0.994244 | 2.493908  |
| Al | -2.248522 | 1.982658  | -2.538389 |
| Al | -2.244510 | -3.469839 | 1.490663  |
| Al | -2.158626 | -0.816177 | -2.047441 |
| Al | -2.126349 | 1.057282  | 0.270890  |
| Al | -1.690164 | -3.428265 | -1.173780 |
| Al | -1.308688 | -2.640548 | -3.804637 |
| Al | -0.832536 | -1.243355 | 0.465662  |
| Al | -0.820750 | 3.145473  | 1.955332  |
| Al | -0.647655 | 0.419424  | 2.783414  |
| Al | -0.596206 | 0.053071  | -4.221961 |
| Al | -0.534757 | 3.278145  | -0.787930 |
| Al | -0.327011 | -2.334948 | 3.052783  |
| Al | -0.024809 | 0.693196  | -1.694187 |
| Al | 0.298415  | 2.672895  | -3.453894 |
| Al | 0.396939  | -3.631365 | 0.687687  |
| Al | 0.536090  | -1.934223 | -1.828767 |
| Al | 0.720125  | 1.314135  | 0.692122  |
| Al | 1.206952  | -1.995036 | -4.458534 |
| Al | 1.307399  | -0.526007 | 4.373767  |
| Al | 1.639775  | 1.937351  | 3.112147  |
| Al | 1.659780  | -1.002739 | 1.659581  |
| Al | 1.733349  | 3.783393  | 0.951068  |
| Al | 2.068073  | 0.424590  | -3.480988 |
| Al | 2.206189  | 2.423747  | -1.456535 |
| Al | 2.397995  | -0.279926 | -0.830595 |
| Al | 2.754730  | -2.932321 | -0.227490 |
| Al | 3.237309  | -2.006585 | -2.713163 |
| Al | 3.457849  | 1.547355  | 0.895643  |
| Al | 3.652025  | 0.107703  | 3.196427  |
| Al | 4.364030  | -1.066800 | 0.868590  |
| Mg | -4.437234 | -2.869245 | -2.778232 |
| Mg | -3.721177 | 0.021580  | -4.641757 |
| Mg | -3.696691 | 3.654022  | 0.098785  |
| Mg | -1.806467 | -0.791265 | 5.453599  |
| Mg | -0.703820 | 2.525045  | 5.129123  |
| Mg | 1.124812  | -4.816847 | -2.485661 |
| Mg | 1.433306  | 5.411812  | -1.929028 |
| Mg | 2.921223  | -3.329202 | 3.100334  |
| Mg | 4.319184  | 3.499662  | 3.141276  |
| Mg | 5.045392  | 0.747627  | -1.941144 |

45

Al36mg9

|    |          |          |           |
|----|----------|----------|-----------|
| Al | 0.822499 | 0.103657 | -4.227755 |
|----|----------|----------|-----------|

|    |           |           |           |
|----|-----------|-----------|-----------|
| Al | 3.548073  | 0.100481  | -3.795448 |
| Al | 2.182017  | 2.406126  | -3.560043 |
| Al | -1.993763 | 0.107109  | -3.349491 |
| Al | 2.136864  | -2.142785 | -3.201707 |
| Al | -0.024483 | 1.687107  | -2.174413 |
| Al | -2.657116 | 2.498901  | -1.913772 |
| Al | 0.064426  | -1.108464 | -1.900703 |
| Al | -0.544250 | 4.294428  | -1.708748 |
| Al | 4.285022  | -1.414850 | -1.670185 |
| Al | -4.161868 | 0.091567  | -1.578563 |
| Al | -2.472297 | -2.175568 | -1.562949 |
| Al | 2.253237  | 0.478857  | -1.452360 |
| Al | -0.159874 | -3.729223 | -1.424096 |
| Al | 1.891997  | 3.346382  | -1.065806 |
| Al | -1.700177 | 0.274219  | -0.595401 |
| Al | 2.006652  | -2.203607 | -0.419770 |
| Al | -2.371519 | 4.199809  | 0.269105  |
| Al | -0.363200 | 2.421504  | 0.412018  |
| Al | -3.592628 | 1.792374  | 0.618918  |
| Al | 3.737395  | -0.334643 | 0.787895  |
| Al | -0.679788 | -2.039104 | 0.796607  |
| Al | -3.497827 | -1.219214 | 0.854966  |
| Al | 0.971631  | 0.051769  | 0.916317  |
| Al | 0.993348  | -4.338201 | 0.918221  |
| Al | 2.574404  | 2.193285  | 1.190269  |
| Al | -1.513775 | 0.405483  | 1.992059  |
| Al | 2.044437  | -2.194831 | 2.285456  |
| Al | -2.127634 | 2.936876  | 2.695299  |
| Al | -3.959663 | 0.583707  | 3.044437  |
| Al | 0.468939  | 2.009579  | 3.051142  |
| Al | -0.296279 | -3.445831 | 3.096009  |
| Al | 2.646251  | 0.332207  | 3.201964  |
| Al | -2.409209 | -1.753619 | 3.317740  |
| Al | 0.195685  | -0.826529 | 3.668413  |
| Al | -1.727370 | 0.900103  | 4.598463  |
| Mg | -0.949365 | 2.933413  | -4.789258 |
| Mg | -0.865310 | -2.725402 | -4.436620 |
| Mg | 2.825117  | -4.896063 | -1.787647 |
| Mg | 4.895558  | 1.981167  | -1.332146 |
| Mg | -6.311106 | 0.208402  | 0.841333  |
| Mg | 4.577747  | -3.457047 | 0.902861  |
| Mg | -2.563052 | -4.425458 | 0.909756  |
| Mg | 0.636926  | 5.017476  | 1.587337  |
| Mg | 1.183328  | 1.074450  | 5.990295  |

45

Al37mg8

|    |           |           |           |
|----|-----------|-----------|-----------|
| Al | -4.422709 | 0.220426  | -1.124605 |
| Al | -3.228227 | 0.644923  | -3.611972 |
| Al | -3.155124 | 2.717260  | -1.713248 |
| Al | -2.968851 | -1.843533 | -2.327731 |
| Al | -2.912554 | 1.555022  | 0.808184  |
| Al | -2.718759 | -3.391642 | 2.134744  |
| Al | -2.658600 | -1.265996 | 0.430326  |
| Al | -2.139650 | -0.858375 | 3.035711  |
| Al | -2.002328 | -3.855928 | -0.444029 |
| Al | -1.752485 | 1.786329  | 3.190572  |
| Al | -1.719336 | 0.470149  | -1.428222 |
| Al | -0.885529 | 2.170822  | -3.344960 |
| Al | -0.776004 | -0.710028 | -3.749363 |
| Al | -0.615440 | 2.693761  | -0.492971 |
| Al | -0.467708 | -4.922390 | 1.561912  |
| Al | -0.437298 | -1.798291 | -1.174207 |
| Al | -0.365122 | 0.385362  | 1.014840  |
| Al | -0.242004 | -2.292134 | 1.564586  |
| Al | 0.321155  | 0.072294  | 3.627256  |
| Al | 0.555271  | 2.687230  | 2.194491  |
| Al | 0.793867  | -4.094629 | -0.761898 |
| Al | 0.999211  | 0.481196  | -2.018105 |
| Al | 1.237889  | 4.528858  | 0.251185  |
| Al | 1.388841  | 3.338858  | -2.303564 |
| Al | 1.748745  | -2.059198 | -2.702601 |
| Al | 1.796751  | -1.141001 | 0.238855  |
| Al | 1.951443  | 1.805680  | -0.017462 |
| Al | 2.122591  | -3.852345 | 1.528225  |



|    |           |           |           |
|----|-----------|-----------|-----------|
| Al | 2.144321  | -1.797446 | 3.099804  |
| Al | 2.668728  | 0.667454  | 2.287787  |
| Al | 3.220584  | 3.329490  | 1.894175  |
| Al | 3.375695  | -3.215584 | -0.770108 |
| Al | 3.555608  | 1.777362  | -2.381463 |
| Al | 3.691275  | 3.841992  | -0.706968 |
| Al | 3.794614  | -0.652736 | -1.478628 |
| Al | 4.221089  | -1.446411 | 1.234431  |
| Al | 4.541650  | 1.287867  | 0.315935  |
| Mg | -5.122460 | -0.291131 | 2.119494  |
| Mg | -5.119087 | -3.027261 | -0.247351 |
| Mg | -1.978099 | 4.588148  | 1.527150  |
| Mg | -1.142155 | 5.261475  | -2.160302 |
| Mg | -0.819229 | -3.942416 | -3.533055 |
| Mg | -0.383393 | -3.234923 | 4.492212  |
| Mg | 1.752059  | 0.991365  | -4.940386 |
| Mg | 2.150764  | 2.390076  | 4.881323  |

|                                  |           |           |           |
|----------------------------------|-----------|-----------|-----------|
| 45                               |           |           |           |
| Al <sup>38</sup> Mg <sup>7</sup> |           |           |           |
| Al                               | -4.977037 | -0.469445 | -0.337109 |
| Al                               | -4.315537 | -3.150103 | -0.887407 |
| Al                               | -4.250956 | -1.261371 | -2.875566 |
| Al                               | -3.639930 | -2.037954 | 1.526259  |
| Al                               | -3.193541 | 1.217356  | -1.805194 |
| Al                               | -2.801217 | 0.595086  | 0.935541  |
| Al                               | -2.526948 | 2.464659  | 2.781673  |
| Al                               | -2.390859 | -1.252825 | -0.936827 |
| Al                               | -2.148141 | -3.248904 | -2.682063 |
| Al                               | -2.031758 | -0.161457 | 3.473095  |
| Al                               | -1.878147 | 2.895651  | -0.044858 |
| Al                               | -1.762644 | -3.759870 | 0.047771  |
| Al                               | -1.698391 | -0.436466 | -3.402322 |
| Al                               | -1.035028 | -1.443943 | 1.329815  |
| Al                               | -0.760451 | 2.350424  | -2.739486 |
| Al                               | -0.481460 | 4.006492  | 2.038013  |
| Al                               | -0.299693 | 0.615955  | -0.857071 |
| Al                               | -0.154817 | 1.283383  | 1.810311  |
| Al                               | 0.045690  | -2.481222 | -4.034450 |
| Al                               | 0.210743  | -2.054128 | -1.350653 |
| Al                               | 0.565685  | -1.109859 | 3.501589  |
| Al                               | 0.617633  | 3.587057  | -0.462798 |
| Al                               | 0.743222  | -3.526524 | 1.220567  |
| Al                               | 0.854884  | 0.094673  | -3.578585 |
| Al                               | 1.445251  | -0.905019 | 0.890969  |
| Al                               | 2.062061  | 2.285704  | -2.373564 |
| Al                               | 2.080601  | 3.300250  | 2.268265  |
| Al                               | 2.157008  | 1.555240  | 0.300190  |
| Al                               | 2.434701  | -0.337312 | -1.532242 |
| Al                               | 2.533862  | -2.481909 | -3.048656 |
| Al                               | 2.593476  | 0.616256  | 2.904066  |
| Al                               | 2.903353  | -2.312124 | 2.551488  |
| Al                               | 2.905013  | -2.881203 | -0.331450 |
| Al                               | 3.385444  | 3.824371  | -0.334621 |
| Al                               | 4.176931  | -0.531822 | 0.816709  |
| Al                               | 4.502248  | 2.132827  | 1.525470  |
| Al                               | 4.525837  | 1.398020  | -1.179474 |
| Al                               | 4.826512  | -1.443068 | -1.680663 |
| Mg                               | -5.172437 | 0.364608  | 2.965171  |
| Mg                               | -5.011626 | 2.769119  | 0.394856  |
| Mg                               | -1.582968 | -3.584539 | 3.498683  |
| Mg                               | 0.202495  | 2.024782  | 4.751122  |
| Mg                               | 0.700890  | -5.019368 | -1.823377 |
| Mg                               | 1.666856  | 6.183309  | 1.001469  |
| Mg                               | 3.973192  | 0.325216  | -4.234655 |

|                                  |           |           |           |
|----------------------------------|-----------|-----------|-----------|
| 45                               |           |           |           |
| Al <sup>39</sup> Mg <sup>6</sup> |           |           |           |
| Al                               | -4.715574 | -0.012630 | 0.415192  |
| Al                               | -4.525812 | 2.458850  | -0.649837 |
| Al                               | -3.785467 | 0.213726  | -2.208586 |
| Al                               | -3.300928 | -3.034000 | 1.519186  |
| Al                               | -3.253604 | 1.964986  | 1.724748  |
| Al                               | -3.199686 | -0.539984 | 2.622261  |
| Al                               | -2.989741 | 2.895389  | -2.791664 |
| Al                               | -2.441541 | -1.209399 | -0.181255 |

|    |           |           |           |
|----|-----------|-----------|-----------|
| Al | -2.277979 | 4.070101  | -0.182678 |
| Al | -1.936058 | 1.466913  | -0.639679 |
| Al | -1.894936 | -1.895432 | -2.759307 |
| Al | -1.851964 | -3.915877 | -0.699678 |
| Al | -1.325892 | 0.794521  | -3.314383 |
| Al | -1.275003 | -2.260735 | 3.268766  |
| Al | -1.192399 | -4.660553 | 1.951533  |
| Al | -1.101321 | 0.915330  | 3.916872  |
| Al | -0.819474 | 2.962990  | 1.895971  |
| Al | -0.781401 | 0.172463  | 1.473415  |
| Al | -0.423586 | 3.336804  | -2.118677 |
| Al | -0.131249 | -2.387732 | 0.768709  |
| Al | -0.032883 | -0.473966 | -1.255094 |
| Al | 0.492165  | -3.088495 | -1.895600 |
| Al | 0.493014  | 4.615030  | 0.162115  |
| Al | 0.610276  | -1.127639 | -3.868243 |
| Al | 0.689677  | -4.963210 | 0.079705  |
| Al | 0.782915  | 1.918453  | -0.110271 |
| Al | 1.017847  | -0.960955 | 3.329622  |
| Al | 1.324192  | -3.623219 | 2.628156  |
| Al | 1.393076  | 1.296992  | -2.792687 |
| Al | 1.423652  | 1.637006  | 2.656144  |
| Al | 1.885126  | -0.435643 | 0.749811  |
| Al | 2.289820  | 3.655066  | -1.724178 |
| Al | 2.545721  | -1.164769 | -1.893215 |
| Al | 2.559525  | -3.034484 | 0.209024  |
| Al | 2.846799  | 3.303104  | 0.968965  |
| Al | 3.426726  | 1.296813  | -0.841994 |
| Al | 3.487071  | -1.779542 | 2.498359  |
| Al | 3.965618  | 0.913537  | 1.841981  |
| Al | 4.513983  | -1.095248 | 0.011347  |
| Mg | -4.831719 | -2.779936 | -1.416780 |
| Mg | 0.049516  | 2.908376  | -5.176516 |
| Mg | 1.310572  | 4.766061  | 3.323221  |
| Mg | 3.344694  | 0.421802  | 4.910408  |
| Mg | 3.356090  | -4.153406 | -2.596671 |
| Mg | 4.280144  | 0.612541  | -3.808519 |

45

Al40Mg5

|    |           |           |           |
|----|-----------|-----------|-----------|
| Al | 1.223095  | -1.278405 | -4.705151 |
| Al | 1.139860  | 1.463966  | -4.510039 |
| Al | -1.317936 | -0.053322 | -4.455041 |
| Al | -3.353700 | 1.364160  | -3.410308 |
| Al | -0.798205 | -2.453707 | -3.194951 |
| Al | 3.122277  | 0.080964  | -3.064775 |
| Al | -0.875158 | 2.267905  | -2.801178 |
| Al | 0.445241  | -0.084346 | -2.428763 |
| Al | 2.185700  | -2.355608 | -2.338376 |
| Al | 1.698406  | 2.226515  | -1.770526 |
| Al | -2.247609 | -0.443726 | -1.672396 |
| Al | -4.761993 | 0.591373  | -1.307144 |
| Al | 4.260871  | 1.533681  | -1.076823 |
| Al | -2.283802 | -3.275872 | -0.959437 |
| Al | -2.772311 | 2.551985  | -0.924752 |
| Al | 4.316433  | -1.296650 | -0.847697 |
| Al | 0.118247  | -1.976849 | -0.661174 |
| Al | -0.108345 | 3.659175  | -0.388260 |
| Al | 2.115438  | -0.034531 | -0.226594 |
| Al | -0.656459 | 0.956455  | -0.099748 |
| Al | -4.315935 | -1.689058 | 0.056629  |
| Al | 2.694559  | 3.542051  | 0.388870  |
| Al | 2.333041  | -3.013550 | 0.394270  |
| Al | -1.813153 | -1.341865 | 0.954967  |
| Al | -3.437854 | 0.856134  | 1.035812  |
| Al | -0.293466 | -3.700599 | 1.365258  |
| Al | 3.940516  | 1.378945  | 1.539521  |
| Al | 1.124409  | 1.726401  | 1.629034  |
| Al | -3.050497 | -3.592415 | 1.706074  |
| Al | -1.616754 | 2.911563  | 1.743786  |
| Al | 3.622807  | -1.235537 | 1.865816  |
| Al | 0.804402  | -1.069210 | 1.954684  |
| Al | 0.646231  | 4.369460  | 2.164612  |
| Al | -1.284793 | 0.472042  | 2.821696  |
| Al | -3.710305 | -1.148733 | 2.865921  |

|    |           |           |           |
|----|-----------|-----------|-----------|
| Al | 2.793259  | 3.177806  | 3.248758  |
| Al | -1.289789 | -2.312068 | 3.500510  |
| Al | 2.458226  | 0.470700  | 3.682476  |
| Al | 0.240838  | 2.322048  | 4.089955  |
| Al | 0.251496  | -0.469371 | 4.754812  |
| Mg | 3.847089  | 3.114697  | -3.850841 |
| Mg | -4.131015 | -1.969371 | -3.471598 |
| Mg | 0.459561  | -4.989052 | -1.529540 |
| Mg | 1.910741  | -3.214908 | 3.834220  |
| Mg | -3.633665 | 1.960727  | 4.097433  |

45

Al41Mg4

|    |           |           |           |
|----|-----------|-----------|-----------|
| Al | -3.979713 | 0.964176  | 1.548938  |
| Al | -3.953710 | -1.193556 | -0.209965 |
| Al | -3.855220 | -1.809268 | 2.417382  |
| Al | -3.556657 | 3.393817  | 0.532048  |
| Al | -3.250426 | -0.755529 | -2.905212 |
| Al | -3.030178 | 0.163676  | 3.971144  |
| Al | -2.980002 | -3.332859 | -1.662942 |
| Al | -2.532596 | 1.174738  | -1.022092 |
| Al | -2.531697 | 2.804597  | 3.223880  |
| Al | -1.993010 | -3.112519 | 0.954971  |
| Al | -1.648575 | -0.377480 | 1.477938  |
| Al | -1.445580 | 3.721215  | -1.144761 |
| Al | -1.378400 | -1.272204 | -1.047189 |
| Al | -1.359224 | 4.767926  | 1.474273  |
| Al | -1.205955 | -2.032943 | 3.459125  |
| Al | -1.182086 | 2.140600  | 1.109130  |
| Al | -1.081145 | -2.564677 | -3.477572 |
| Al | -0.686630 | 0.277206  | -3.345167 |
| Al | -0.498755 | 0.841586  | 3.764283  |
| Al | -0.241132 | -3.838238 | -1.045190 |
| Al | 0.288068  | 0.959732  | -0.889151 |
| Al | 0.497167  | 3.311154  | 2.941884  |
| Al | 0.551172  | 2.842922  | -2.711761 |
| Al | 0.608553  | -1.774295 | 0.795183  |
| Al | 0.929031  | 3.612902  | 0.192691  |
| Al | 1.025889  | -1.513011 | -2.073113 |
| Al | 1.183359  | 0.850479  | 1.610484  |
| Al | 1.393853  | -1.206372 | 3.422016  |
| Al | 1.468348  | -3.875663 | -3.176044 |
| Al | 2.173221  | 1.453626  | 4.095676  |
| Al | 2.178079  | 0.669369  | -3.107415 |
| Al | 2.515917  | -3.364118 | -0.669043 |
| Al | 2.725901  | -0.355330 | -0.302194 |
| Al | 2.897569  | 2.280940  | -1.042186 |
| Al | 3.102856  | 2.699238  | 1.728690  |
| Al | 3.165982  | -2.444311 | 1.720097  |
| Al | 3.565515  | -1.943428 | -2.752724 |
| Al | 3.737102  | 0.030981  | 2.396542  |
| Al | 4.709292  | 0.398119  | -2.161942 |
| Al | 4.949570  | -1.691984 | -0.270072 |
| Al | 5.001299  | 1.136009  | 0.366149  |
| Mg | -5.594696 | 1.362859  | -1.246997 |
| Mg | -2.743027 | 2.576081  | -3.817951 |
| Mg | 0.691409  | -4.512473 | 2.164866  |
| Mg | 1.369258  | -1.463692 | -5.286709 |

45

Al42Mg3

|    |           |           |           |
|----|-----------|-----------|-----------|
| Al | -0.144520 | 1.511019  | -4.622093 |
| Al | -2.811642 | 0.790645  | -4.424364 |
| Al | 1.871413  | -0.398132 | -4.374668 |
| Al | -0.828905 | -1.191363 | -4.259964 |
| Al | 1.244989  | -3.051224 | -3.926830 |
| Al | -1.989122 | 3.115378  | -3.163120 |
| Al | -3.077564 | -1.223537 | -2.545608 |
| Al | 1.600732  | 1.634611  | -2.519223 |
| Al | 3.353323  | -1.983134 | -2.476943 |
| Al | -0.991705 | -3.197202 | -2.292325 |
| Al | -1.159555 | 0.728364  | -2.267011 |
| Al | 0.849472  | -1.150251 | -2.021156 |
| Al | -3.831881 | 1.420502  | -1.884825 |
| Al | 1.564532  | -3.749933 | -1.235735 |
| Al | -0.222568 | 3.220430  | -1.077079 |

|    |           |           |           |
|----|-----------|-----------|-----------|
| Al | 3.118239  | 0.044067  | -0.606166 |
| Al | -2.895699 | 3.748108  | -0.604182 |
| Al | -1.433477 | -1.321996 | -0.358614 |
| Al | 0.527642  | 0.777142  | -0.187416 |
| Al | 2.396316  | 2.693145  | 0.068236  |
| Al | -4.016161 | -0.566734 | 0.099729  |
| Al | 3.699701  | -2.542867 | 0.245562  |
| Al | -2.045941 | 1.368030  | 0.268926  |
| Al | -0.686777 | -3.810067 | 0.494432  |
| Al | 1.155650  | -1.764813 | 0.650086  |
| Al | -4.636211 | 2.063982  | 0.724840  |
| Al | 1.858442  | -4.241300 | 1.500688  |
| Al | 4.566401  | -0.314235 | 1.686033  |
| Al | 0.129771  | 2.643280  | 1.757560  |
| Al | -2.564186 | -2.177202 | 1.979255  |
| Al | 1.994236  | 0.471523  | 2.002851  |
| Al | -0.671717 | -0.175414 | 2.095429  |
| Al | -2.555232 | 3.155865  | 2.196396  |
| Al | 3.852457  | 2.311058  | 2.329299  |
| Al | -3.308124 | 0.488056  | 2.618201  |
| Al | 2.751489  | -2.036869 | 2.925291  |
| Al | 0.006092  | -2.721879 | 3.000904  |
| Al | 1.622628  | 2.246197  | 4.014385  |
| Al | -1.100490 | 1.632154  | 4.042262  |
| Al | 3.587649  | 0.301399  | 4.204546  |
| Al | 0.896447  | -0.423399 | 4.392522  |
| Al | -1.802644 | -1.057086 | 4.396327  |
| Mg | 4.596229  | 0.895750  | -3.233657 |
| Mg | -3.713746 | -3.713012 | -0.612598 |
| Mg | -0.755983 | 5.550941  | 0.999816  |

|         |           |           |           |
|---------|-----------|-----------|-----------|
| 45      |           |           |           |
| Al43Mg2 |           |           |           |
| Al      | 0.637952  | -1.801620 | -4.378612 |
| Al      | -1.169240 | 0.194814  | -3.700873 |
| Al      | 1.605703  | 0.681714  | -3.545795 |
| Al      | -1.583859 | -2.507335 | -2.880906 |
| Al      | -2.925715 | 2.179968  | -2.858750 |
| Al      | 2.925378  | -1.713332 | -2.836803 |
| Al      | -0.175997 | 2.709487  | -2.799917 |
| Al      | 2.572138  | 3.129896  | -2.643525 |
| Al      | 0.953373  | -3.678185 | -2.355725 |
| Al      | -3.414735 | -0.463966 | -2.127763 |
| Al      | 3.920924  | 0.817195  | -1.987210 |
| Al      | 0.404106  | -1.043636 | -1.739358 |
| Al      | -3.811207 | -3.105623 | -1.462740 |
| Al      | 5.150430  | -1.580795 | -1.168226 |
| Al      | -1.336355 | 0.935835  | -1.010709 |
| Al      | 1.385603  | 1.428714  | -0.820417 |
| Al      | 3.311140  | -3.533515 | -0.756675 |
| Al      | -1.864967 | 3.640207  | -0.752025 |
| Al      | -1.290378 | -4.263263 | -0.693395 |
| Al      | 0.975088  | 4.114722  | -0.621697 |
| Al      | -3.914608 | 1.686218  | -0.311432 |
| Al      | 2.662786  | -0.880751 | -0.210381 |
| Al      | -1.808343 | -1.703478 | -0.126267 |
| Al      | 3.532162  | 2.876536  | -0.047782 |
| Al      | 0.902740  | -2.899058 | 0.248677  |
| Al      | -4.407536 | -1.070856 | 0.395040  |
| Al      | 4.963507  | 0.506287  | 0.541734  |
| Al      | -3.361652 | -3.656348 | 1.096116  |
| Al      | 0.217530  | -0.338280 | 1.103044  |
| Al      | -0.328248 | 2.318581  | 1.190201  |
| Al      | -0.688289 | 5.053022  | 1.296056  |
| Al      | 4.278788  | -2.073975 | 1.455870  |
| Al      | -2.335221 | 0.456800  | 1.509447  |
| Al      | 2.629179  | 0.999748  | 1.768101  |
| Al      | -2.799725 | 3.217226  | 1.845253  |
| Al      | 1.787361  | 3.661091  | 2.030509  |
| Al      | -0.901600 | -3.092003 | 2.140500  |
| Al      | 1.872404  | -1.591980 | 2.686921  |
| Al      | -3.209702 | -1.639363 | 2.853406  |
| Al      | 0.707517  | 1.335917  | 3.554896  |
| Al      | -0.594613 | 3.719399  | 3.582237  |
| Al      | -0.730790 | -0.901720 | 3.648629  |

|         |           |           |           |
|---------|-----------|-----------|-----------|
| Al      | -2.052098 | 1.478746  | 3.918567  |
| Mg      | 2.431755  | -4.687526 | 2.224722  |
| Mg      | -5.122687 | 1.084484  | 2.747055  |
| 45      |           |           |           |
| Al44Mg1 |           |           |           |
| Al      | -4.354331 | -0.130433 | -0.347707 |
| Al      | -4.018858 | -1.425389 | 2.108504  |
| Al      | -3.665324 | -1.567135 | -2.669868 |
| Al      | -3.658696 | 2.604481  | -0.518031 |
| Al      | -3.343842 | -2.832725 | -0.195119 |
| Al      | -3.392162 | 1.294605  | 1.940631  |
| Al      | -2.544170 | -4.118666 | -2.540675 |
| Al      | -2.620355 | 3.975958  | 1.638835  |
| Al      | -2.491272 | 0.098537  | -4.450027 |
| Al      | -2.222298 | 0.712713  | -1.877989 |
| Al      | -1.883206 | -0.636288 | 0.642344  |
| Al      | -1.675836 | -2.990918 | 2.097026  |
| Al      | -1.748505 | -0.487756 | 3.432661  |
| Al      | -1.401297 | -2.356609 | -4.321975 |
| Al      | -1.424781 | 4.374333  | -0.842626 |
| Al      | -1.157577 | -1.932630 | -1.702246 |
| Al      | -0.947116 | -4.359232 | -0.273297 |
| Al      | -1.174230 | 2.035856  | 0.404693  |
| Al      | -1.040396 | 2.268520  | 3.187914  |
| Al      | 0.053404  | -0.083427 | -3.610686 |
| Al      | 0.237712  | -3.993090 | -2.751152 |
| Al      | 0.032326  | 2.496062  | -2.268269 |
| Al      | 0.265298  | 0.164082  | -0.934879 |
| Al      | 0.412994  | 0.299255  | 1.895468  |
| Al      | 0.603767  | 0.479033  | 4.589632  |
| Al      | 1.351249  | 4.555986  | -1.019522 |
| Al      | 0.726115  | -4.448261 | 1.943669  |
| Al      | 1.798484  | 2.436572  | 2.986985  |
| Al      | 0.155366  | 4.221521  | 1.505426  |
| Al      | 0.485264  | -2.144744 | 0.533229  |
| Al      | 1.577438  | 2.198957  | 0.214394  |
| Al      | 1.763486  | -1.796720 | -2.124036 |
| Al      | 1.942565  | -4.112886 | -0.554768 |
| Al      | 2.857529  | -0.218942 | 3.083242  |
| Al      | 2.449301  | 0.981517  | -2.307935 |
| Al      | 2.593094  | -0.370303 | 0.301964  |
| Al      | 2.916066  | -2.731378 | 1.755165  |
| Al      | 0.669702  | -2.031694 | 3.340495  |
| Al      | 2.937432  | 4.305312  | 1.251681  |
| Al      | 3.769321  | 3.039476  | -1.063987 |
| Al      | 4.089025  | -2.320958 | -0.758291 |
| Al      | 4.050865  | 1.736217  | 1.414182  |
| Al      | 4.790380  | 0.441749  | -0.976851 |
| Al      | 5.004881  | -0.896353 | 1.438520  |
| Mg      | -2.768812 | 3.265794  | -3.596723 |
| 45      |           |           |           |
| Al45Mg0 |           |           |           |
| Al      | 1.004653  | -0.618536 | -5.038056 |
| Al      | 0.541051  | 1.836248  | -4.171968 |
| Al      | -1.453301 | 0.053471  | -3.755130 |
| Al      | 2.533535  | -2.325335 | -3.706897 |
| Al      | 3.287796  | 0.366199  | -3.504107 |
| Al      | -0.192115 | -2.417010 | -3.309553 |
| Al      | -2.410863 | 2.609195  | -3.256108 |
| Al      | 0.044631  | 4.178906  | -3.051099 |
| Al      | -2.874381 | -2.197321 | -2.908592 |
| Al      | 1.073393  | -0.236120 | -2.269706 |
| Al      | 2.222649  | 2.557141  | -2.176413 |
| Al      | -3.684299 | 0.284802  | -2.051724 |
| Al      | 1.512590  | -3.720228 | -1.556246 |
| Al      | -0.579497 | 1.912261  | -1.538443 |
| Al      | 3.390256  | -1.595798 | -1.307177 |
| Al      | -1.888056 | 4.515637  | -1.269555 |
| Al      | -1.398802 | -0.699415 | -1.094655 |
| Al      | -1.191239 | -3.481451 | -1.002936 |
| Al      | 4.048624  | 0.950953  | -0.755583 |
| Al      | -3.166516 | 2.355526  | -0.418475 |
| Al      | 0.668046  | 4.031961  | -0.359659 |
| Al      | -3.609234 | -2.466030 | -0.305574 |

|    |           |           |          |
|----|-----------|-----------|----------|
| Al | 0.994454  | -1.631380 | 0.087849 |
| Al | 1.528651  | 1.139547  | 0.094367 |
| Al | 3.210527  | 3.338029  | 0.316896 |
| Al | 2.942448  | -3.498653 | 0.765404 |
| Al | -3.605078 | -0.074340 | 0.818052 |
| Al | -1.139563 | 1.139159  | 1.030425 |
| Al | 0.309577  | -4.207530 | 1.116856 |
| Al | 3.322575  | -0.884343 | 1.360113 |
| Al | -1.487946 | 3.803901  | 1.366123 |
| Al | -1.296187 | -1.757625 | 1.368290 |
| Al | -2.372546 | -4.287128 | 1.420680 |
| Al | 1.044657  | 2.984055  | 2.132666 |
| Al | 3.341830  | 1.558557  | 2.367328 |
| Al | -3.354715 | 2.099847  | 2.412716 |
| Al | 0.801157  | 0.077839  | 2.448170 |
| Al | -3.761460 | -2.269888 | 2.510111 |
| Al | 1.363894  | -2.515087 | 2.883094 |
| Al | -2.181011 | -0.257707 | 3.416865 |
| Al | -1.238292 | -2.981180 | 3.686765 |
| Al | -0.937211 | 2.078041  | 3.721528 |
| Al | 2.904915  | -0.636610 | 4.093599 |
| Al | 1.597729  | 1.658156  | 4.552303 |
| Al | 0.132672  | -0.770713 | 4.837453 |

Al0Mg50

|    |           |           |           |
|----|-----------|-----------|-----------|
| Mg | 0.302207  | -0.623211 | -6.325781 |
| Mg | -0.246639 | 2.529387  | -4.710464 |
| Mg | -2.775071 | -0.058593 | -4.576325 |
| Mg | 3.009850  | 0.941913  | -4.567287 |
| Mg | -1.102649 | -3.267502 | -4.348994 |
| Mg | 2.488299  | -2.656394 | -4.345233 |
| Mg | -0.790043 | 5.625279  | -2.984232 |
| Mg | -3.328256 | 3.102261  | -2.882159 |
| Mg | -5.789895 | 0.507584  | -2.718954 |
| Mg | 2.459808  | 4.097221  | -2.877599 |
| Mg | 0.268831  | -0.409775 | -2.837749 |
| Mg | -4.178827 | -2.697858 | -2.525307 |
| Mg | 5.662589  | 2.480672  | -2.700888 |
| Mg | 5.205664  | -1.084263 | -2.542751 |
| Mg | -2.476993 | -5.850667 | -2.268868 |
| Mg | 1.078996  | -5.308175 | -2.323626 |
| Mg | 4.631434  | -4.643891 | -2.295052 |
| Mg | -0.270100 | 2.669327  | -1.196353 |
| Mg | -2.733495 | 0.147891  | -1.065653 |
| Mg | 2.919561  | 1.115762  | -1.044579 |
| Mg | -1.096138 | -2.994544 | -0.831411 |
| Mg | -0.678493 | -6.016028 | 0.828967  |
| Mg | 4.310474  | 4.086701  | 0.218628  |
| Mg | 1.040420  | 5.661661  | 0.087904  |
| Mg | 6.032247  | 0.852939  | 0.472872  |
| Mg | 5.561714  | -2.752863 | 0.603155  |
| Mg | -2.537417 | 5.014283  | 0.099379  |
| Mg | 0.262921  | -0.225556 | 0.603918  |
| Mg | -5.063349 | 2.428805  | 0.233411  |
| Mg | 2.414784  | -2.401694 | -0.819047 |
| Mg | -5.622157 | -1.157877 | 0.441447  |
| Mg | 2.916627  | -5.460323 | 0.743651  |
| Mg | -3.962578 | -4.381243 | 0.657681  |
| Mg | 1.531554  | 2.648133  | 1.840941  |
| Mg | 3.291051  | -0.522666 | 2.195420  |
| Mg | -1.958398 | 2.009709  | 1.858584  |
| Mg | -2.510784 | -1.489436 | 2.055470  |
| Mg | 0.716567  | -3.157947 | 2.332090  |
| Mg | 2.852307  | 5.589911  | 3.161130  |
| Mg | 4.625134  | 2.490596  | 3.414395  |
| Mg | -0.703682 | 5.001864  | 3.210025  |
| Mg | 3.930532  | -3.652816 | 3.605720  |
| Mg | -4.222869 | 4.291165  | 3.192420  |
| Mg | -4.844783 | 0.763182  | 3.429793  |
| Mg | 0.250426  | -0.034913 | 4.046295  |
| Mg | -2.195878 | -4.491221 | 3.776227  |
| Mg | -5.346875 | -2.802398 | 3.596198  |
| Mg | 1.479043  | 3.038181  | 5.278997  |
| Mg | -2.084136 | 2.310953  | 5.301585  |
| Mg | -2.723532 | -1.263522 | 5.502012  |

## Al1Mg49

|    |           |           |           |
|----|-----------|-----------|-----------|
| Al | -0.733028 | 2.809644  | 2.058827  |
| Mg | -5.990015 | 1.044309  | 3.187833  |
| Mg | -5.804694 | 2.246308  | -0.210790 |
| Mg | -5.726579 | -1.193120 | 0.019175  |
| Mg | -5.098446 | -2.693184 | -3.210160 |
| Mg | -4.755336 | 0.841585  | -3.174932 |
| Mg | -4.423665 | -2.384274 | 3.080378  |
| Mg | -3.882000 | -4.204987 | -0.196894 |
| Mg | -3.775638 | 3.849581  | 1.982826  |
| Mg | -3.008146 | 0.530029  | 1.692288  |
| Mg | -2.634002 | -5.556205 | 2.847082  |
| Mg | -2.597386 | 2.156738  | 4.658381  |
| Mg | -2.533884 | -1.136575 | -1.421393 |
| Mg | -2.350825 | -1.075633 | -4.957016 |
| Mg | -2.228253 | 2.596068  | -0.891337 |
| Mg | -2.060518 | 2.545697  | -4.645312 |
| Mg | -1.843755 | -4.152954 | -3.177832 |
| Mg | -1.486777 | 5.328228  | 3.965202  |
| Mg | -1.459691 | -2.984243 | 5.019632  |
| Mg | -1.292454 | -2.619047 | 1.538321  |
| Mg | -1.263942 | 5.575702  | 0.547100  |
| Mg | -0.850244 | 5.296162  | -2.852700 |
| Mg | -0.580485 | -5.643558 | -0.127368 |
| Mg | -0.199728 | 0.013390  | 3.660184  |
| Mg | -0.007019 | 0.323573  | 0.339217  |
| Mg | 0.167940  | 0.494636  | -3.013320 |
| Mg | 0.378782  | 0.686819  | -6.491769 |
| Mg | 0.709611  | -2.597505 | -1.364385 |
| Mg | 0.749010  | 2.967294  | 4.941518  |
| Mg | 0.899903  | -4.915994 | 3.076678  |
| Mg | 0.932579  | -2.465602 | -4.854581 |
| Mg | 1.130836  | 3.288694  | -0.614240 |
| Mg | 1.453534  | -5.545366 | -3.088891 |
| Mg | 1.501138  | 5.079792  | 2.387907  |
| Mg | 1.581742  | 3.337623  | -4.362527 |
| Mg | 1.886886  | 6.610870  | -0.893903 |
| Mg | 2.036104  | -2.239586 | 5.229086  |
| Mg | 2.155084  | -1.890284 | 1.760474  |
| Mg | 2.399287  | 1.781503  | 2.191934  |
| Mg | 2.949064  | -4.896846 | 0.097378  |
| Mg | 3.067087  | 0.065121  | -1.029892 |
| Mg | 3.341473  | 0.175268  | -4.552463 |
| Mg | 3.883673  | -2.919259 | -2.799321 |
| Mg | 4.341503  | 4.444430  | 0.602203  |
| Mg | 4.390402  | -4.102795 | 3.285277  |
| Mg | 4.476295  | 2.872135  | -2.464837 |
| Mg | 4.755130  | -0.530388 | 3.586695  |
| Mg | 5.373048  | -2.242919 | 0.395052  |
| Mg | 5.788389  | 1.281846  | 0.720798  |
| Mg | 6.238011  | -0.252721 | -2.475583 |

## Al2Mg48

|    |           |           |           |
|----|-----------|-----------|-----------|
| Al | -3.718738 | 0.404467  | -0.353872 |
| Al | 0.752616  | 3.502911  | 3.054528  |
| Mg | 1.314137  | -3.402986 | -6.043777 |
| Mg | -1.192089 | -1.085788 | -5.200491 |
| Mg | 2.193508  | -0.127785 | -4.926766 |
| Mg | -4.430530 | -2.522332 | -4.908776 |
| Mg | -0.357704 | 2.404163  | -4.354726 |
| Mg | -1.618351 | -4.593588 | -4.193807 |
| Mg | 3.987484  | -3.117144 | -3.650904 |
| Mg | 5.456533  | 0.111943  | -3.590951 |
| Mg | -3.543412 | 0.765499  | -3.542310 |
| Mg | 1.589505  | -5.823235 | -3.528785 |
| Mg | 3.079018  | 2.973131  | -3.467755 |
| Mg | 0.771951  | -2.424059 | -2.684361 |
| Mg | -5.971744 | -1.126415 | -2.063936 |
| Mg | -2.675685 | -2.138703 | -1.952001 |
| Mg | -5.946203 | 2.290096  | -1.735195 |
| Mg | -0.708174 | 0.525049  | -1.544273 |

|    |           |           |           |
|----|-----------|-----------|-----------|
| Mg | -2.666559 | 3.311852  | -1.491219 |
| Mg | 2.724819  | 0.240032  | -1.430637 |
| Mg | -3.929715 | -5.253747 | -1.396922 |
| Mg | 4.293502  | 4.959764  | -0.886643 |
| Mg | -0.404591 | -4.923422 | -0.682330 |
| Mg | 3.414199  | -5.189401 | -0.663560 |
| Mg | 5.242931  | -2.040425 | -0.559915 |
| Mg | 5.712236  | 1.658162  | -0.450121 |
| Mg | 1.144872  | 3.381775  | -0.256518 |
| Mg | 1.862626  | -2.429150 | 0.575110  |
| Mg | -4.707887 | -2.434064 | 0.786186  |
| Mg | -6.665834 | 0.331286  | 0.954166  |
| Mg | -1.432695 | -1.469202 | 1.104705  |
| Mg | -1.265069 | 5.308910  | 1.241333  |
| Mg | -4.663003 | 3.066657  | 1.309701  |
| Mg | -1.516667 | 1.951832  | 1.372281  |
| Mg | 2.033873  | 6.089896  | 1.647519  |
| Mg | 1.497342  | 0.702913  | 1.768517  |
| Mg | -2.628224 | -4.913465 | 1.969268  |
| Mg | 3.773322  | 3.177425  | 2.030746  |
| Mg | 4.707220  | -0.293741 | 2.437016  |
| Mg | 4.343148  | -3.851740 | 2.515216  |
| Mg | 0.817367  | -4.902887 | 2.716131  |
| Mg | -3.871075 | 0.104770  | 2.909473  |
| Mg | -2.340010 | 3.753055  | 4.097642  |
| Mg | 1.859584  | -1.816826 | 4.131700  |
| Mg | -0.117253 | 6.343495  | 4.283877  |
| Mg | -1.615940 | -2.562172 | 4.373652  |
| Mg | -0.596208 | 0.840826  | 4.434381  |
| Mg | 3.004773  | 5.039232  | 4.760233  |
| Mg | 2.704073  | 1.618896  | 4.841258  |
| Mg | 0.302720  | 3.584238  | 6.245912  |

#### Al3Mg47

|    |           |           |           |
|----|-----------|-----------|-----------|
| Al | 3.976675  | 0.967855  | -2.195807 |
| Al | -4.480240 | 1.237008  | -0.545549 |
| Al | 0.639680  | -3.368128 | 3.738904  |
| Mg | -0.196797 | 2.838028  | -5.513504 |
| Mg | 2.440821  | 0.403943  | -5.033942 |
| Mg | 5.782893  | 1.006664  | -4.867997 |
| Mg | 1.482279  | -3.258740 | -4.843845 |
| Mg | -0.957092 | -0.670981 | -4.448041 |
| Mg | -2.880141 | 5.019784  | -4.313105 |
| Mg | 3.546883  | 3.501657  | -4.182626 |
| Mg | 4.551945  | -1.903284 | -3.602353 |
| Mg | -5.604405 | 2.461644  | -3.352372 |
| Mg | -4.265098 | -0.716942 | -3.138393 |
| Mg | -2.339567 | 2.020423  | -2.762846 |
| Mg | 1.018964  | 2.150084  | -2.383731 |
| Mg | 6.383057  | 3.115100  | -2.272513 |
| Mg | 1.583370  | -1.109885 | -2.168705 |
| Mg | -0.800785 | -3.803468 | -1.965690 |
| Mg | 6.966180  | -0.211037 | -1.898588 |
| Mg | -7.240824 | -0.011259 | -1.677228 |
| Mg | 2.770658  | -4.465491 | -1.647547 |
| Mg | -0.566796 | 5.087324  | -1.491793 |
| Mg | -4.019002 | 4.401553  | -1.013783 |
| Mg | 3.440980  | 3.857520  | -0.795711 |
| Mg | -1.797748 | -0.684149 | -0.736632 |
| Mg | -7.093548 | 3.139663  | -0.365343 |
| Mg | 4.357037  | -1.584692 | -0.207165 |
| Mg | -4.919768 | -1.937039 | -0.052713 |
| Mg | -1.669539 | 2.375239  | 0.521630  |
| Mg | 2.124257  | 0.939616  | 0.523045  |
| Mg | 5.458701  | 1.523309  | 0.635218  |
| Mg | 1.108537  | -2.590274 | 0.742247  |
| Mg | 0.181847  | -5.727436 | 1.498044  |
| Mg | -6.745428 | 0.431275  | 1.644205  |
| Mg | 1.033623  | 4.204802  | 1.679826  |
| Mg | -2.179067 | 5.618959  | 1.761991  |
| Mg | -2.020109 | -3.147476 | 1.813801  |
| Mg | -4.686531 | 3.151522  | 2.064266  |
| Mg | -3.471184 | 0.036009  | 2.279960  |



|    |           |           |          |
|----|-----------|-----------|----------|
| Mg | 3.310423  | -4.604055 | 2.301789 |
| Mg | -0.158537 | -0.357380 | 2.822390 |
| Mg | 3.130311  | -1.314391 | 3.157095 |
| Mg | -1.485908 | 2.709880  | 3.955790 |
| Mg | 2.161659  | 1.935035  | 4.069320 |
| Mg | -1.782595 | -5.427863 | 4.297761 |
| Mg | 1.474025  | -6.357764 | 4.593008 |
| Mg | -2.025461 | -2.093530 | 5.058368 |
| Mg | 3.254792  | -3.650528 | 5.603654 |
| Mg | 1.105444  | -1.005963 | 5.901695 |
| Mg | 0.101129  | -4.132142 | 6.813513 |

Al4Mg46

|    |           |           |           |
|----|-----------|-----------|-----------|
| Al | 2.593011  | -2.420710 | -3.388289 |
| Al | -3.651932 | -2.696583 | -1.852571 |
| Al | -0.100262 | 4.879713  | 0.481797  |
| Al | 1.159135  | 0.237473  | 4.759077  |
| Mg | 3.698038  | -3.441646 | -6.224997 |
| Mg | 0.596411  | -2.028490 | -5.946081 |
| Mg | 3.426168  | -0.126834 | -5.493755 |
| Mg | -3.082339 | -4.043029 | -4.768623 |
| Mg | 1.186114  | -5.103462 | -4.598645 |
| Mg | -2.807118 | -0.677582 | -4.317196 |
| Mg | -5.870525 | -2.169935 | -4.116742 |
| Mg | 5.737215  | -2.012871 | -3.864717 |
| Mg | 0.746932  | 0.288784  | -3.475728 |
| Mg | 4.363522  | -5.101817 | -3.329483 |
| Mg | -0.580523 | -2.804178 | -2.872490 |
| Mg | -5.490816 | -5.209920 | -2.634496 |
| Mg | 1.719642  | 4.605946  | -2.201739 |
| Mg | -1.565170 | 3.557383  | -2.118530 |
| Mg | 3.880321  | 0.294940  | -2.113673 |
| Mg | -0.776756 | 6.900636  | -1.913511 |
| Mg | -2.179468 | -5.614406 | -1.881899 |
| Mg | -5.049134 | 0.242383  | -1.853071 |
| Mg | 1.681978  | -4.753997 | -1.246185 |
| Mg | -1.805126 | -0.182024 | -1.142491 |
| Mg | -6.681957 | -2.556863 | -0.814156 |
| Mg | 4.515659  | -2.828024 | -0.794761 |
| Mg | 1.466137  | -1.467956 | -0.548921 |
| Mg | 0.832250  | 1.941755  | -0.378441 |
| Mg | 2.060026  | 7.204628  | -0.022554 |
| Mg | -3.211753 | 5.620284  | 0.082176  |
| Mg | -1.361126 | -3.267771 | 0.424063  |
| Mg | -4.422480 | -4.693405 | 0.557417  |
| Mg | 3.066342  | 4.087638  | 0.938515  |
| Mg | -2.299082 | 2.513745  | 1.050916  |
| Mg | -4.086817 | -1.312094 | 1.071681  |
| Mg | -0.975296 | 7.835221  | 1.381629  |
| Mg | 2.916519  | 0.464741  | 1.999112  |
| Mg | -0.488501 | -0.290912 | 2.067562  |
| Mg | 0.580374  | 2.804199  | 2.871853  |
| Mg | 1.378569  | 6.072572  | 3.133536  |
| Mg | 1.777336  | -2.540214 | 3.159263  |
| Mg | -1.885303 | 5.093314  | 3.211490  |
| Mg | 3.465769  | 2.548653  | 4.616439  |
| Mg | -1.942395 | 1.345033  | 4.624805  |
| Mg | -1.183693 | -2.019120 | 4.849534  |
| Mg | 4.208955  | -0.801007 | 4.854006  |
| Mg | 0.512300  | 3.073755  | 6.234984  |
| Mg | 1.721986  | -2.331030 | 6.593442  |
| Mg | -0.556647 | 0.067555  | 7.470775  |
| Mg | 2.763509  | 0.815527  | 7.479672  |

Al5Mg45

|    |           |           |           |
|----|-----------|-----------|-----------|
| Al | -1.482012 | -4.001954 | 0.820571  |
| Al | -0.987255 | 1.646899  | -5.378494 |
| Al | 0.070529  | 1.659578  | 3.596227  |
| Al | 0.939140  | -3.343934 | 1.904845  |
| Al | 2.059669  | 3.038347  | 2.326211  |
| Mg | -4.372996 | -4.800936 | -0.448415 |
| Mg | -4.129673 | -2.788532 | 2.313807  |

|    |           |           |           |
|----|-----------|-----------|-----------|
| Mg | -4.099181 | 0.763565  | -5.076994 |
| Mg | -3.298351 | -6.128429 | 2.476521  |
| Mg | -3.166144 | -1.643199 | -0.734380 |
| Mg | -3.053416 | 2.869298  | -7.535517 |
| Mg | -3.039405 | 3.918229  | -4.286181 |
| Mg | -2.963164 | 1.947089  | 2.431038  |
| Mg | -2.384849 | 4.409787  | -0.642156 |
| Mg | -2.295218 | -0.129257 | 5.088237  |
| Mg | -2.128130 | 1.269749  | -2.376604 |
| Mg | -2.126849 | -0.415580 | -7.590036 |
| Mg | -2.014963 | 3.256083  | 5.464765  |
| Mg | -1.743345 | -6.987953 | -0.442830 |
| Mg | -1.650075 | -4.225410 | -2.402436 |
| Mg | -1.541416 | -1.379088 | -4.378212 |
| Mg | -1.418490 | -3.804486 | 4.028200  |
| Mg | -1.265596 | -0.996825 | 2.035075  |
| Mg | -0.766876 | 4.562103  | 2.603241  |
| Mg | -0.430123 | 4.681179  | -6.340895 |
| Mg | -0.264217 | 1.919719  | 0.427801  |
| Mg | 0.092766  | -6.380957 | 2.323734  |
| Mg | 0.131416  | 2.005328  | -8.384515 |
| Mg | 0.161058  | 3.681590  | -3.141191 |
| Mg | 0.196430  | -1.806537 | -0.797614 |
| Mg | 0.343707  | 1.167202  | 6.797126  |
| Mg | 0.845092  | -1.409946 | 4.604858  |
| Mg | 1.071497  | -0.635432 | -6.434854 |
| Mg | 1.100303  | 0.444578  | -3.221749 |
| Mg | 1.114021  | -5.140898 | -0.712850 |
| Mg | 1.190725  | 4.991986  | -0.101565 |
| Mg | 1.305562  | 4.048343  | 5.294426  |
| Mg | 1.593555  | -3.089750 | -3.668771 |
| Mg | 1.773449  | -4.699229 | 4.738552  |
| Mg | 1.951881  | -0.148214 | 1.704434  |
| Mg | 2.124968  | 2.529767  | -5.678451 |
| Mg | 2.191876  | 6.240029  | 2.885149  |
| Mg | 2.901774  | 2.084250  | -0.706682 |
| Mg | 3.024475  | 1.125144  | 4.722195  |
| Mg | 3.349288  | -5.481864 | 1.804918  |
| Mg | 3.383611  | -2.648274 | -0.140734 |
| Mg | 3.827560  | -2.427079 | 3.261061  |
| Mg | 4.444493  | 4.681761  | 0.836819  |
| Mg | 4.518637  | 4.092709  | 4.171463  |
| Mg | 4.914262  | 1.479450  | 1.960850  |

#### Al6Mg44

|    |           |           |           |
|----|-----------|-----------|-----------|
| Al | -1.041466 | 4.102062  | -1.772273 |
| Al | -0.798306 | 1.421277  | -1.973008 |
| Al | -0.246358 | 2.935734  | -4.130678 |
| Al | 0.232655  | -5.035014 | -1.366804 |
| Al | 0.417136  | -0.126629 | 5.457367  |
| Al | 1.030799  | -0.072070 | 2.840732  |
| Mg | -4.052965 | 5.326978  | -1.608415 |
| Mg | -3.497685 | -0.476566 | -1.972487 |
| Mg | -3.391370 | 2.574784  | -3.417046 |
| Mg | -3.202475 | 2.399984  | -0.061878 |
| Mg | -2.706786 | -0.515935 | 6.243500  |
| Mg | -2.374722 | 2.845547  | -6.588041 |
| Mg | -2.373657 | -3.670702 | 0.033544  |
| Mg | -2.332099 | -6.932075 | -0.967709 |
| Mg | -2.318124 | -4.428479 | -3.291996 |
| Mg | -2.131040 | 5.528106  | -4.442020 |
| Mg | -1.979199 | 5.339421  | 1.101107  |
| Mg | -1.768896 | 1.335614  | 3.555686  |
| Mg | -1.589635 | 0.033011  | -4.750539 |
| Mg | -1.441295 | -0.353403 | 0.699174  |
| Mg | -1.340545 | -2.099602 | 3.576706  |
| Mg | -1.310991 | 7.323816  | -1.646330 |
| Mg | -1.122208 | 2.472036  | 6.679844  |
| Mg | -0.433059 | -5.936890 | 1.693082  |
| Mg | -0.422402 | -3.010113 | 6.708102  |
| Mg | -0.410233 | -1.892939 | -2.138677 |
| Mg | -0.308153 | -7.163478 | -3.706618 |
| Mg | -0.282112 | -0.195784 | 8.625399  |

|    |          |           |           |
|----|----------|-----------|-----------|
| Mg | 0.055198 | 2.624790  | 0.940889  |
| Mg | 0.364214 | 4.858503  | -6.664136 |
| Mg | 0.695410 | 1.429249  | -6.852831 |
| Mg | 0.788249 | -2.862551 | 1.039844  |
| Mg | 0.857836 | -8.094408 | -0.626983 |
| Mg | 0.896230 | -4.037108 | -4.393846 |
| Mg | 1.114662 | 5.786953  | -3.468437 |
| Mg | 1.202900 | 5.713425  | -0.010873 |
| Mg | 1.207809 | 2.780311  | 4.230613  |
| Mg | 1.634918 | 0.300596  | -3.780872 |
| Mg | 1.708962 | 0.031940  | -0.391404 |
| Mg | 1.929197 | -2.756854 | 4.277534  |
| Mg | 1.998628 | 3.015409  | -1.799567 |
| Mg | 2.152013 | 1.836856  | 7.364996  |
| Mg | 2.588586 | -1.557765 | 7.389983  |
| Mg | 2.782557 | -5.544916 | 0.589297  |
| Mg | 2.783468 | -3.039349 | -1.730213 |
| Mg | 2.849326 | -6.299619 | -2.740631 |
| Mg | 2.873598 | 3.267208  | -5.014742 |
| Mg | 3.350664 | 1.993402  | 1.763019  |
| Mg | 3.547570 | 0.275756  | 4.710717  |
| Mg | 3.813195 | -1.450517 | 1.787920  |

### Al7Mg43

|    |           |           |           |
|----|-----------|-----------|-----------|
| Al | -1.471409 | -0.506042 | -4.194959 |
| Al | 0.431388  | 1.452885  | -4.076882 |
| Al | 0.920211  | -0.991131 | -2.948660 |
| Al | 0.941116  | -1.356481 | 0.058844  |
| Al | -0.125745 | -3.614838 | 1.173461  |
| Al | 0.895299  | -1.678051 | 2.769186  |
| Al | -0.111771 | 3.289005  | 4.381554  |
| Mg | -2.039316 | -1.963784 | -7.031482 |
| Mg | 2.028042  | 2.216624  | -6.795946 |
| Mg | -1.321000 | 1.395096  | -6.788566 |
| Mg | 1.037604  | -0.926351 | -6.170682 |
| Mg | -4.301247 | 0.135995  | -5.608540 |
| Mg | -0.221394 | 4.333655  | -5.395867 |
| Mg | -0.323237 | -3.524725 | -4.499813 |
| Mg | 3.058368  | -2.973852 | -4.449950 |
| Mg | 3.482604  | 0.415214  | -4.261974 |
| Mg | -3.651821 | -2.922434 | -4.176879 |
| Mg | -2.598188 | 2.469085  | -3.850350 |
| Mg | 2.775577  | 3.681816  | -3.801646 |
| Mg | -4.071311 | -0.186907 | -2.198567 |
| Mg | -0.067771 | 3.932413  | -2.015814 |
| Mg | 1.461429  | -3.962567 | -1.642676 |
| Mg | -1.557271 | -2.462156 | -1.551196 |
| Mg | 3.775592  | -1.503843 | -1.480204 |
| Mg | -1.054724 | 0.821686  | -1.288760 |
| Mg | 2.178382  | 1.429391  | -1.263408 |
| Mg | -1.290911 | -5.797137 | -0.951604 |
| Mg | -3.295196 | 3.396611  | -0.603704 |
| Mg | 1.574630  | -6.351028 | 0.819412  |
| Mg | -3.362625 | -3.951474 | 0.989618  |
| Mg | 3.123724  | -3.402729 | 1.220538  |
| Mg | -1.975543 | -0.956905 | 1.418777  |
| Mg | -0.396130 | 4.649623  | 1.461405  |
| Mg | 3.445304  | -0.041541 | 1.577376  |
| Mg | 0.381162  | 1.345550  | 1.724804  |
| Mg | -1.371493 | -6.263049 | 2.501628  |
| Mg | -2.730677 | 2.473252  | 2.655991  |
| Mg | 2.648495  | 3.629639  | 2.661328  |
| Mg | 1.370784  | -4.666833 | 3.822063  |
| Mg | -1.697784 | -3.182883 | 3.939412  |
| Mg | -2.345832 | 5.562222  | 4.108933  |
| Mg | 1.010064  | 6.267323  | 4.129403  |
| Mg | 3.726422  | -2.158724 | 4.269936  |
| Mg | -1.191585 | 0.168359  | 4.512672  |
| Mg | 2.093871  | 0.830517  | 4.570806  |
| Mg | 0.820038  | -2.072677 | 5.998501  |
| Mg | -2.830398 | 2.781002  | 6.035772  |
| Mg | 2.554725  | 3.893245  | 6.056403  |
| Mg | -0.508517 | 5.107177  | 6.974821  |

|    |          |          |          |
|----|----------|----------|----------|
| Mg | 0.178064 | 1.740754 | 7.215483 |
|----|----------|----------|----------|

Al8Mg42

|    |           |           |           |
|----|-----------|-----------|-----------|
| Al | -3.244561 | -3.960894 | -0.590167 |
| Al | -1.810279 | -3.145119 | 1.605714  |
| Al | -0.883964 | -5.223715 | 0.072409  |
| Al | -0.857734 | -2.694115 | -0.924827 |
| Al | 0.624735  | 4.648808  | 0.485608  |
| Al | 1.285281  | 2.124442  | -0.274407 |
| Al | 2.520458  | 4.221221  | -1.470284 |
| Al | 3.077915  | 3.582836  | 1.152945  |
| Mg | -6.021020 | -5.534432 | -0.097589 |
| Mg | -5.962816 | -2.350050 | -1.337729 |
| Mg | -5.005854 | -2.941389 | 1.919444  |
| Mg | -4.818345 | -4.939104 | -3.239426 |
| Mg | -3.880611 | 1.932542  | -2.273909 |
| Mg | -3.396176 | -5.911341 | 1.983261  |
| Mg | -3.305711 | -0.787605 | -0.020220 |
| Mg | -3.164858 | -7.125446 | -1.165026 |
| Mg | -3.066948 | -1.977363 | -3.155341 |
| Mg | -2.962585 | -3.753305 | 4.552208  |
| Mg | -2.897578 | -0.562975 | 3.299803  |
| Mg | -2.274143 | 5.797233  | -0.405815 |
| Mg | -1.823032 | 2.525825  | 0.525056  |
| Mg | -1.567231 | 5.034435  | 2.845554  |
| Mg | -1.455024 | -4.946742 | -3.107479 |
| Mg | -1.027969 | -8.207758 | 1.301438  |
| Mg | -0.843039 | 0.371608  | -2.009872 |
| Mg | -0.548502 | 3.702019  | -2.381462 |
| Mg | -0.286737 | -5.455796 | 3.233432  |
| Mg | -0.214090 | -0.384477 | 1.203864  |
| Mg | -0.026332 | 7.689135  | 1.354267  |
| Mg | 0.019869  | -2.134142 | 4.116857  |
| Mg | 0.172518  | -7.603519 | -1.842727 |
| Mg | 0.298868  | -2.156358 | -3.919071 |
| Mg | 0.577497  | 2.438604  | 2.861237  |
| Mg | 0.662673  | 6.816545  | -1.892879 |
| Mg | 1.419674  | -3.284674 | 1.283286  |
| Mg | 1.644532  | -4.483892 | -1.828458 |
| Mg | 1.740916  | 4.903112  | -4.535236 |
| Mg | 1.790377  | 5.552220  | 3.350310  |
| Mg | 1.944729  | -6.583233 | 0.881215  |
| Mg | 1.954580  | 1.663025  | -3.399272 |
| Mg | 2.078326  | -1.035859 | -1.188948 |
| Mg | 3.037937  | 0.388890  | 1.819085  |
| Mg | 3.084764  | 6.733993  | 0.465801  |
| Mg | 3.616550  | 2.774543  | 4.244330  |
| Mg | 3.989016  | 6.782908  | -2.778585 |
| Mg | 4.334117  | 1.558429  | -1.048845 |
| Mg | 4.777691  | 3.589620  | -3.705373 |
| Mg | 5.176024  | 5.432978  | 2.770047  |
| Mg | 5.569930  | 4.680147  | -0.557890 |
| Mg | 5.946159  | 2.238186  | 1.823664  |

Al9Mg41

|    |           |           |           |
|----|-----------|-----------|-----------|
| Al | -3.979607 | -3.522182 | 0.120569  |
| Al | -3.581445 | -1.774504 | -1.988782 |
| Al | -2.766797 | -1.141690 | 0.525159  |
| Al | -1.474192 | -3.109051 | -0.873960 |
| Al | 1.785578  | 3.381816  | 0.942676  |
| Al | 1.820338  | 1.049719  | 2.400056  |
| Al | 1.940650  | 0.990574  | -0.365261 |
| Al | 3.357269  | 3.085714  | -1.323228 |
| Al | 4.081328  | 1.849989  | 1.059750  |
| Mg | -6.959396 | -3.859834 | 1.267278  |
| Mg | -6.303902 | -3.446069 | -2.087697 |
| Mg | -6.114148 | -0.183187 | -3.166422 |
| Mg | -5.892284 | -0.877706 | 0.124488  |
| Mg | -5.368498 | -6.348473 | -0.500519 |
| Mg | -4.541005 | -2.064001 | 3.001406  |
| Mg | -4.516703 | -2.655654 | -4.930278 |
| Mg | -4.319111 | -5.511675 | 2.637080  |

|    |           |           |           |
|----|-----------|-----------|-----------|
| Mg | -4.093933 | 1.218880  | 2.213222  |
| Mg | -3.739435 | 1.384359  | -1.196993 |
| Mg | -3.292921 | -4.912976 | -2.745688 |
| Mg | -2.970686 | 0.343616  | -4.385013 |
| Mg | -1.981131 | -6.072717 | 0.152231  |
| Mg | -1.627948 | -3.526994 | 2.379616  |
| Mg | -1.241371 | -0.165746 | 3.649887  |
| Mg | -1.174724 | -2.573068 | -4.028711 |
| Mg | -0.979009 | 1.696853  | 0.897376  |
| Mg | -0.968859 | 5.071117  | 0.743208  |
| Mg | -0.808034 | -0.095017 | -1.866482 |
| Mg | -0.051573 | 3.364349  | 3.612255  |
| Mg | 0.123498  | -5.296294 | -2.542144 |
| Mg | 0.140801  | 3.195802  | -1.853160 |
| Mg | 0.337206  | -1.330728 | 0.980317  |
| Mg | 1.101254  | -4.535763 | 0.583410  |
| Mg | 1.579924  | 1.129779  | 5.557687  |
| Mg | 1.708488  | 6.172072  | 2.507394  |
| Mg | 1.821828  | -1.826662 | 3.942230  |
| Mg | 1.829986  | -2.107872 | -1.893956 |
| Mg | 1.917130  | 5.947324  | -0.959287 |
| Mg | 2.067084  | 1.013971  | -3.537639 |
| Mg | 2.350414  | 4.452314  | -4.049191 |
| Mg | 3.349382  | 3.486710  | 3.771394  |
| Mg | 3.613981  | -1.367692 | 1.093995  |
| Mg | 4.534579  | 5.030543  | 0.988912  |
| Mg | 4.561224  | 0.332748  | 3.867562  |
| Mg | 4.702938  | 0.121950  | -1.650514 |
| Mg | 5.078915  | 5.597333  | -2.306477 |
| Mg | 5.174616  | 2.561641  | -3.913638 |
| Mg | 6.510941  | 2.874925  | -0.739409 |
| Mg | 6.556929  | 2.960103  | 2.755967  |
| Mg | 6.700430  | -0.008647 | 1.129326  |

#### Al10Mg40

|    |           |           |           |
|----|-----------|-----------|-----------|
| Al | -1.788765 | -0.290242 | 3.547406  |
| Al | -1.319547 | 0.519405  | -3.895167 |
| Al | -0.676813 | -0.070192 | -1.267320 |
| Al | -0.492487 | 0.631040  | 5.752941  |
| Al | 0.047275  | -0.660670 | 1.532647  |
| Al | 0.369131  | 1.426321  | 3.300412  |
| Al | 0.384273  | -1.560573 | -3.329719 |
| Al | 0.757233  | -1.169446 | 4.158003  |
| Al | 0.882559  | 0.058275  | -5.495569 |
| Al | 1.205772  | 1.042320  | -2.951028 |
| Mg | -4.702040 | 0.835914  | 2.734613  |
| Mg | -4.268073 | -0.185258 | -4.966078 |
| Mg | -4.238485 | -2.338108 | 3.806396  |
| Mg | -3.728328 | 0.308711  | 6.020786  |
| Mg | -3.700852 | 0.958419  | -1.737404 |
| Mg | -3.257953 | 3.011975  | -4.504947 |
| Mg | -2.950953 | -1.384671 | 0.699571  |
| Mg | -2.726476 | -2.120923 | -2.639354 |
| Mg | -2.380919 | 2.804577  | 4.317049  |
| Mg | -1.942754 | 1.778406  | 1.087780  |
| Mg | -1.772381 | 1.116441  | -7.002247 |
| Mg | -1.663622 | -0.175848 | 8.612294  |
| Mg | -1.631112 | -2.367844 | 5.991094  |
| Mg | -1.569917 | -2.050618 | -5.818419 |
| Mg | -1.177789 | -3.362414 | 2.772147  |
| Mg | -1.083718 | 3.066339  | -1.902209 |
| Mg | -0.665551 | -4.572150 | -3.724083 |
| Mg | -0.309652 | -3.162122 | -0.545689 |
| Mg | -0.199808 | 4.408886  | 2.192856  |
| Mg | 0.086055  | 3.177784  | -5.059806 |
| Mg | 0.389666  | -1.172193 | -8.420482 |
| Mg | 0.557248  | 3.721639  | 5.518392  |
| Mg | 0.921217  | 1.905846  | 8.311562  |
| Mg | 1.104106  | -4.189438 | 5.157827  |
| Mg | 1.305547  | 1.988308  | 0.207353  |
| Mg | 1.344448  | -1.450268 | 7.321013  |
| Mg | 1.414207  | 2.061862  | -7.948851 |
| Mg | 1.660228  | -3.072345 | -5.828831 |

|    |          |           |           |
|----|----------|-----------|-----------|
| Mg | 2.078111 | 4.103837  | -2.450609 |
| Mg | 2.078153 | -3.140945 | 1.975990  |
| Mg | 2.288171 | -1.080251 | -0.757754 |
| Mg | 2.429558 | -3.931875 | -2.538450 |
| Mg | 2.681616 | 1.072981  | 5.504086  |
| Mg | 2.915660 | 3.358426  | 2.977669  |
| Mg | 3.107437 | 0.053817  | 2.305716  |
| Mg | 3.315758 | 2.164053  | -5.058028 |
| Mg | 3.502743 | -0.999873 | -3.888088 |
| Mg | 3.529322 | -0.523469 | -7.223691 |
| Mg | 3.740464 | -2.090129 | 4.863238  |
| Mg | 4.152037 | 1.546283  | -1.715019 |

#### Al11Mg39

|    |           |           |           |
|----|-----------|-----------|-----------|
| Al | -1.967609 | 0.223721  | -0.932091 |
| Al | -1.545768 | -2.140032 | -2.348872 |
| Al | -0.939810 | 1.927966  | 3.558158  |
| Al | -0.683282 | -0.800289 | 3.700618  |
| Al | -0.570470 | 0.257015  | -3.316898 |
| Al | -0.212783 | 0.520613  | 1.309769  |
| Al | 0.285418  | 1.810243  | -1.196649 |
| Al | 0.524219  | -0.913670 | -1.015020 |
| Al | 1.000954  | -2.002071 | -3.481884 |
| Al | 1.544204  | 0.768237  | 3.439079  |
| Al | 2.133101  | 0.450568  | -2.780901 |
| Mg | -4.835476 | 1.556611  | -0.753935 |
| Mg | -4.365882 | -1.872237 | -0.769506 |
| Mg | -3.956546 | -3.485079 | -3.899744 |
| Mg | -3.919367 | 3.169362  | 3.520190  |
| Mg | -3.736723 | -0.096451 | -3.597680 |
| Mg | -3.380772 | -2.594135 | 3.816976  |
| Mg | -3.294566 | 0.226800  | 2.007883  |
| Mg | -3.075452 | 0.437874  | 5.422272  |
| Mg | -2.610816 | -4.876192 | -1.107387 |
| Mg | -2.344614 | 2.875160  | -2.725274 |
| Mg | -2.058971 | 3.032218  | 0.648948  |
| Mg | -1.830154 | 1.616762  | -5.890011 |
| Mg | -1.774404 | 3.550488  | 6.180944  |
| Mg | -1.537925 | -2.371335 | 0.930186  |
| Mg | -1.492478 | -1.791162 | -5.560312 |
| Mg | -1.231158 | -2.282349 | 6.480547  |
| Mg | -1.135960 | 5.129327  | 3.193394  |
| Mg | -0.645727 | -4.700360 | -4.020354 |
| Mg | -0.293099 | -4.020470 | 3.662295  |
| Mg | 0.001226  | 4.962473  | -1.321845 |
| Mg | 0.187294  | 0.793828  | 6.355934  |
| Mg | 0.685746  | -4.067819 | -0.946957 |
| Mg | 0.743989  | 3.058804  | -4.123839 |
| Mg | 1.170933  | 3.371251  | 1.483561  |
| Mg | 1.290689  | 0.168720  | -5.887159 |
| Mg | 1.433949  | 3.613247  | 4.892820  |
| Mg | 1.509611  | -3.205789 | -6.368482 |
| Mg | 1.652435  | -2.052625 | 1.762966  |
| Mg | 1.938698  | -1.890038 | 5.176322  |
| Mg | 2.822718  | -4.601402 | -3.555402 |
| Mg | 2.856496  | 0.723082  | 0.414173  |
| Mg | 3.044998  | 3.346313  | -1.639752 |
| Mg | 3.424843  | -2.138999 | -1.268636 |
| Mg | 3.537171  | 1.075380  | 5.920697  |
| Mg | 3.929595  | 2.068267  | -4.825877 |
| Mg | 3.969236  | -1.450558 | -4.562339 |
| Mg | 4.111970  | 2.682016  | 2.937232  |
| Mg | 4.415595  | -0.704739 | 3.109445  |
| Mg | 5.224726  | 0.641456  | -2.027600 |

#### Al12Mg38

|    |           |           |           |
|----|-----------|-----------|-----------|
| Al | -1.956968 | -0.765622 | 3.261985  |
| Al | -1.918258 | -0.272310 | 0.520330  |
| Al | -1.269936 | 0.201510  | -2.184287 |
| Al | -0.606932 | 2.825550  | -2.717100 |
| Al | -0.527406 | -2.424474 | 1.586864  |
| Al | -0.205808 | 0.864259  | -4.630301 |

|    |           |           |           |
|----|-----------|-----------|-----------|
| Al | -0.139308 | 1.767654  | -0.216604 |
| Al | 0.314171  | 0.225236  | 2.075401  |
| Al | 0.577726  | -1.706972 | 3.993826  |
| Al | 0.601511  | -0.912758 | -0.438422 |
| Al | 1.383925  | 0.933551  | -2.392365 |
| Al | 2.162039  | -1.800111 | 1.697370  |
| Mg | -4.684197 | 0.401400  | 1.875679  |
| Mg | -4.588176 | -1.950272 | 4.552872  |
| Mg | -4.303540 | -0.721852 | -1.559526 |
| Mg | -3.706811 | -2.778870 | 1.363993  |
| Mg | -3.558121 | 1.228726  | 5.131250  |
| Mg | -3.334309 | 1.680753  | -4.054667 |
| Mg | -3.244454 | 2.344978  | -0.764230 |
| Mg | -2.999057 | 4.905817  | -2.989899 |
| Mg | -2.430773 | -1.549105 | -4.517316 |
| Mg | -2.196880 | 0.786627  | -7.111665 |
| Mg | -2.016602 | 2.403374  | 2.332670  |
| Mg | -1.831245 | -3.904209 | 4.049538  |
| Mg | -1.767751 | -2.890256 | -1.376187 |
| Mg | -1.572922 | -1.418707 | 6.352637  |
| Mg | -1.482240 | -5.383027 | 0.965798  |
| Mg | -1.120321 | 3.756799  | -5.696393 |
| Mg | -1.001809 | 4.790034  | -0.113069 |
| Mg | -0.147742 | 1.355838  | 4.966027  |
| Mg | 0.259527  | 5.835694  | -3.234950 |
| Mg | 0.277783  | -1.535852 | -6.685115 |
| Mg | 0.749792  | -2.051949 | -3.383946 |
| Mg | 0.850956  | -3.986409 | 6.165822  |
| Mg | 1.122305  | 1.718470  | -7.386460 |
| Mg | 1.193069  | 3.303682  | 2.275300  |
| Mg | 1.301483  | -4.010802 | -0.537837 |
| Mg | 1.304094  | -4.680474 | 2.848126  |
| Mg | 1.855448  | -0.783863 | 6.739965  |
| Mg | 2.054524  | 3.213726  | -4.491935 |
| Mg | 2.081374  | 3.854094  | -1.149860 |
| Mg | 2.903065  | 1.066123  | 0.444465  |
| Mg | 2.909269  | -0.066205 | -4.976735 |
| Mg | 2.924721  | 0.566489  | 3.798985  |
| Mg | 3.513158  | -1.568000 | -1.438737 |
| Mg | 3.613148  | -2.712854 | 4.369091  |
| Mg | 4.237663  | -4.105375 | 1.135082  |
| Mg | 4.455597  | 1.682263  | -2.485766 |
| Mg | 4.734864  | 3.209332  | 2.278322  |
| Mg | 5.230355  | -0.941655 | 1.751973  |

#### Al13Mg37

|    |           |           |           |
|----|-----------|-----------|-----------|
| Al | -3.896971 | 2.399818  | 0.886101  |
| Al | -2.413854 | 0.624104  | -0.605001 |
| Al | -1.916825 | 3.340438  | -0.783360 |
| Al | -1.254332 | 1.973941  | 1.542550  |
| Al | -0.451250 | -0.590627 | 0.917287  |
| Al | -0.393682 | -0.980728 | -1.812996 |
| Al | 0.175305  | 1.570818  | -0.782464 |
| Al | 0.599668  | -2.924193 | -0.071174 |
| Al | 1.478701  | 1.202432  | 1.663228  |
| Al | 1.850977  | -1.587103 | 2.040788  |
| Al | 1.938588  | -2.410817 | -2.418826 |
| Al | 1.980593  | -0.491797 | -0.475380 |
| Al | 3.344390  | -2.795055 | -0.009025 |
| Mg | -6.899733 | 2.831666  | -0.038077 |
| Mg | -6.100609 | 1.181008  | 2.845862  |
| Mg | -5.457800 | 4.528802  | 2.642482  |
| Mg | -5.375982 | -0.323566 | -0.255189 |
| Mg | -4.504677 | 2.191245  | -2.351433 |
| Mg | -4.447499 | 5.200131  | -0.599560 |
| Mg | -3.296049 | -1.192372 | -3.114544 |
| Mg | -3.230994 | -0.467160 | 2.359147  |
| Mg | -3.035704 | 2.415199  | 4.080242  |
| Mg | -2.662205 | -2.606811 | -0.151756 |
| Mg | -2.592516 | 4.751013  | -3.539098 |
| Mg | -2.158615 | 4.954980  | 2.011417  |
| Mg | -1.411347 | 1.534671  | -3.546039 |
| Mg | -1.183228 | 6.420600  | -0.915145 |

|    |           |           |           |
|----|-----------|-----------|-----------|
| Mg | -1.000467 | -5.598513 | 0.394116  |
| Mg | -0.957268 | -3.105625 | 2.762554  |
| Mg | -0.908753 | -4.005963 | -2.671907 |
| Mg | -0.334301 | -0.018929 | 4.024877  |
| Mg | -0.071605 | -1.586236 | -4.873022 |
| Mg | 0.439573  | 3.236916  | 3.925702  |
| Mg | 0.707158  | 4.036045  | -2.644289 |
| Mg | 0.882631  | 4.256430  | 0.741466  |
| Mg | 1.682043  | -2.773570 | 4.932631  |
| Mg | 1.816959  | -4.641057 | -4.633670 |
| Mg | 1.847278  | 0.765369  | -3.395766 |
| Mg | 1.922385  | -4.812291 | 2.104671  |
| Mg | 1.985916  | -5.458566 | -1.309703 |
| Mg | 3.021926  | 0.341912  | 4.311421  |
| Mg | 3.267737  | 2.409696  | -0.805063 |
| Mg | 3.475177  | -1.707914 | -5.084642 |
| Mg | 3.678309  | 3.239491  | 2.536390  |
| Mg | 4.524637  | 0.057350  | 1.292125  |
| Mg | 4.582388  | -2.864163 | 2.979124  |
| Mg | 4.661702  | -0.591072 | -2.069179 |
| Mg | 4.719141  | -3.949346 | -2.651292 |
| Mg | 4.887148  | -5.479435 | 0.543891  |
| Mg | 6.485935  | -2.501167 | 0.069528  |

#### Al14Mg36

|    |           |           |           |
|----|-----------|-----------|-----------|
| Al | -2.762412 | -1.762944 | 0.512792  |
| Al | -2.094362 | -0.198551 | -1.780786 |
| Al | -1.681547 | 2.575172  | -1.242040 |
| Al | -1.479680 | 0.672404  | 0.750858  |
| Al | -0.843225 | -3.796718 | 1.049887  |
| Al | -0.742193 | -1.418675 | 2.413127  |
| Al | -0.188451 | -1.593640 | -0.342491 |
| Al | 0.306617  | 2.790711  | 0.710299  |
| Al | 0.422189  | 0.857219  | -1.333951 |
| Al | 0.958336  | 3.434133  | -1.875273 |
| Al | 1.191511  | 0.235244  | 1.315370  |
| Al | 1.653110  | -2.485551 | 1.445998  |
| Al | 2.456850  | -0.943425 | -0.818944 |
| Al | 2.733947  | 1.852503  | -0.308938 |
| Mg | -5.729293 | -1.939483 | 1.425115  |
| Mg | -4.847392 | -1.757112 | -1.915165 |
| Mg | -4.473642 | 1.084584  | -0.074349 |
| Mg | -4.126026 | 4.495149  | -1.177563 |
| Mg | -3.956972 | 1.816659  | -3.360750 |
| Mg | -3.847068 | -4.729870 | 0.348446  |
| Mg | -3.520541 | 0.111918  | 3.076369  |
| Mg | -3.088988 | -3.305535 | 3.340185  |
| Mg | -2.748196 | -1.199041 | -4.656675 |
| Mg | -2.703439 | 3.391134  | 1.749931  |
| Mg | -1.928520 | -3.476416 | -2.116082 |
| Mg | -1.605681 | -6.347124 | 2.683456  |
| Mg | -1.477307 | 4.781783  | -3.499268 |
| Mg | -1.354151 | -1.200287 | 5.477706  |
| Mg | -0.907614 | -6.417694 | -0.674892 |
| Mg | -0.882845 | 5.548645  | -0.241536 |
| Mg | -0.667917 | 1.583243  | -4.162878 |
| Mg | -0.508798 | 1.602659  | 3.648515  |
| Mg | 0.171895  | 4.924302  | 3.000167  |
| Mg | 0.349543  | -3.868181 | 4.066938  |
| Mg | 0.480336  | -1.513197 | -3.444715 |
| Mg | 1.444065  | -4.028360 | -1.403306 |
| Mg | 1.578554  | 6.433410  | -2.486889 |
| Mg | 1.682225  | 3.977386  | -4.880193 |
| Mg | 1.751723  | -5.646070 | 1.531716  |
| Mg | 1.871546  | -0.770461 | 4.215943  |
| Mg | 2.555533  | 4.985871  | 0.485110  |
| Mg | 2.688575  | 2.508667  | 2.889395  |
| Mg | 2.704678  | 1.031269  | -3.450150 |
| Mg | 3.810428  | -3.500671 | 3.441367  |
| Mg | 3.852357  | -2.279358 | -3.261703 |
| Mg | 4.121461  | 3.865475  | -2.316137 |
| Mg | 4.237635  | -0.341113 | 1.766658  |
| Mg | 4.419581  | -3.273789 | 0.043398  |



|    |          |          |           |
|----|----------|----------|-----------|
| Mg | 5.309971 | 0.299895 | -1.402352 |
| Mg | 5.413592 | 2.933830 | 0.838284  |

Al15Mg35

|    |           |           |           |
|----|-----------|-----------|-----------|
| Al | -2.397775 | 1.235163  | 0.674885  |
| Al | -2.207998 | -1.420836 | 1.617532  |
| Al | -1.911201 | -0.888884 | -1.170945 |
| Al | -0.959353 | 0.696961  | 3.048981  |
| Al | -0.900282 | -0.011932 | -3.618871 |
| Al | -0.533321 | 1.557416  | -1.416081 |
| Al | -0.210276 | -2.768671 | 0.143933  |
| Al | -0.064210 | -0.121436 | 0.651208  |
| Al | 0.081701  | 2.525455  | 1.160135  |
| Al | 0.390211  | -1.773187 | 2.721404  |
| Al | 0.845727  | -0.966729 | -1.750845 |
| Al | 1.566525  | 1.271836  | -3.136178 |
| Al | 1.811358  | 0.670776  | 2.404083  |
| Al | 2.065480  | 1.180543  | -0.392773 |
| Al | 2.269208  | -1.478366 | 0.629130  |
| Mg | -5.068987 | 2.786643  | 0.650405  |
| Mg | -4.864667 | -0.670409 | -0.044468 |
| Mg | -4.682328 | -2.915915 | 2.697764  |
| Mg | -4.161621 | 0.533078  | 3.223029  |
| Mg | -3.782442 | -1.597828 | -3.533788 |
| Mg | -3.552815 | 1.603593  | -2.325073 |
| Mg | -3.219473 | -3.681636 | -0.443744 |
| Mg | -2.950172 | 1.116053  | -5.687907 |
| Mg | -2.409208 | 3.550530  | 2.869165  |
| Mg | -2.068907 | 4.188779  | -0.566489 |
| Mg | -2.040959 | -1.750804 | 4.793875  |
| Mg | -1.988515 | 1.638589  | 5.803887  |
| Mg | -1.476415 | -4.381776 | 2.571268  |
| Mg | -1.311636 | -1.883276 | -6.085513 |
| Mg | -0.939956 | 3.285688  | -3.934222 |
| Mg | -0.865878 | -3.314543 | -2.977215 |
| Mg | -0.384265 | -5.787800 | -0.486560 |
| Mg | 0.265152  | 5.562515  | 1.694550  |
| Mg | 0.606983  | 1.147899  | -6.154695 |
| Mg | 0.808934  | 3.119647  | 4.195810  |
| Mg | 0.912958  | -3.672221 | 5.099575  |
| Mg | 1.035852  | -0.149698 | 5.395987  |
| Mg | 1.295328  | 4.126514  | -1.376262 |
| Mg | 1.781162  | -1.694933 | -4.594759 |
| Mg | 1.947501  | -4.423558 | 1.811681  |
| Mg | 2.284979  | -3.780324 | -1.623341 |
| Mg | 2.370103  | 3.884902  | -4.646725 |
| Mg | 3.113672  | 3.481471  | 1.516893  |
| Mg | 3.494149  | -1.795183 | 3.543986  |
| Mg | 3.982261  | -0.791563 | -2.028596 |
| Mg | 3.982907  | 1.593318  | 4.393468  |
| Mg | 4.008671  | 0.885613  | -5.044593 |
| Mg | 4.323079  | 2.620181  | -1.947771 |
| Mg | 4.758871  | 0.470255  | 1.117505  |
| Mg | 4.949888  | -3.011909 | 0.557277  |

Al16Mg34

|    |           |           |           |
|----|-----------|-----------|-----------|
| Al | 0.814148  | -1.745839 | -3.120480 |
| Al | -1.989070 | -1.377198 | -2.906424 |
| Al | -0.279514 | 0.615526  | -2.196659 |
| Al | 2.019625  | -0.450775 | -1.000203 |
| Al | 1.864253  | -3.164330 | -0.901267 |
| Al | 1.480149  | 2.309760  | -0.785731 |
| Al | -0.490517 | -1.890220 | -0.741936 |
| Al | -2.510582 | 0.026934  | -0.541726 |
| Al | -1.326797 | 2.610989  | -0.509130 |
| Al | -0.040282 | 0.466107  | 0.492912  |
| Al | 1.264993  | -1.724081 | 1.423000  |
| Al | 2.445562  | 0.861511  | 1.454039  |
| Al | -1.559969 | -1.381738 | 1.766441  |
| Al | 0.368760  | 2.781531  | 1.770201  |
| Al | -2.106545 | 1.381984  | 1.930162  |
| Al | 0.239641  | 0.293899  | 3.151086  |

|    |           |           |           |
|----|-----------|-----------|-----------|
| Mg | 2.294423  | -1.595132 | -5.830813 |
| Mg | -0.905801 | -3.040415 | -5.422513 |
| Mg | -0.627706 | 0.351600  | -5.267534 |
| Mg | -3.979109 | -3.529485 | -3.831774 |
| Mg | 2.213310  | -4.487123 | -3.799396 |
| Mg | 2.449428  | 1.132533  | -3.697371 |
| Mg | -0.052947 | 3.542232  | -3.329766 |
| Mg | -3.033519 | 1.768464  | -3.186415 |
| Mg | 4.126189  | -1.853329 | -2.793678 |
| Mg | -0.861393 | -4.492039 | -2.348394 |
| Mg | 3.218168  | 4.349307  | -2.307611 |
| Mg | -5.093191 | -0.685913 | -2.110302 |
| Mg | -2.815633 | 5.026445  | -1.707308 |
| Mg | 4.561907  | 1.401977  | -0.928072 |
| Mg | 1.857073  | -6.236390 | -0.794787 |
| Mg | -3.365452 | -3.075308 | -0.370756 |
| Mg | 0.433975  | 5.262528  | -0.271089 |
| Mg | -4.479161 | 2.424733  | -0.010666 |
| Mg | 4.385470  | -1.672195 | 0.674361  |
| Mg | -0.495539 | -4.406303 | 1.122664  |
| Mg | 3.324666  | 3.921961  | 1.233367  |
| Mg | -4.651300 | -0.588707 | 1.705091  |
| Mg | -2.299055 | 4.563369  | 1.803621  |
| Mg | 2.812323  | -4.352365 | 2.003245  |
| Mg | 5.307629  | 1.259276  | 2.520364  |
| Mg | -3.276262 | -3.537308 | 3.143525  |
| Mg | 0.834040  | 5.445057  | 3.249323  |
| Mg | -4.498134 | 2.426738  | 3.564929  |
| Mg | 3.070909  | -1.076743 | 3.918295  |
| Mg | 0.047676  | -2.767977 | 4.150308  |
| Mg | 2.380589  | 2.393193  | 4.238983  |
| Mg | -2.555311 | -0.364848 | 4.585464  |
| Mg | -1.096483 | 2.803886  | 4.605906  |
| Mg | 0.574366  | 0.074218  | 6.204516  |

#### Al17Mg33

|    |           |           |           |
|----|-----------|-----------|-----------|
| Al | -1.821847 | -1.528035 | -3.862694 |
| Al | -0.338335 | 0.878141  | -3.666497 |
| Al | -2.784113 | 0.528184  | -2.319056 |
| Al | 1.778119  | 0.639817  | -1.752376 |
| Al | -0.489401 | -0.932701 | -1.691413 |
| Al | -2.877635 | -2.091148 | -1.294345 |
| Al | -0.695355 | 1.873376  | -1.114569 |
| Al | 1.794872  | -1.986713 | -0.565814 |
| Al | -2.261054 | 0.042445  | 0.348112  |
| Al | 1.592254  | 2.502944  | 0.393206  |
| Al | 0.448500  | 0.079601  | 0.579685  |
| Al | -0.791691 | -2.365351 | 0.648208  |
| Al | 3.115249  | 0.128173  | 0.724365  |
| Al | -0.912850 | 2.129729  | 1.688875  |
| Al | 1.517664  | -1.740221 | 2.216731  |
| Al | -0.970368 | -0.494038 | 2.787223  |
| Al | 1.437026  | 1.047297  | 2.849222  |
| Mg | -0.200754 | -0.637962 | -6.437279 |
| Mg | -3.031861 | 0.949638  | -5.458716 |
| Mg | 2.636861  | 1.247228  | -4.720696 |
| Mg | 1.577451  | -1.847257 | -3.842733 |
| Mg | -4.993656 | -1.344231 | -3.626158 |
| Mg | -3.328733 | -4.295322 | -3.515223 |
| Mg | -2.083382 | 3.544652  | -3.361110 |
| Mg | -5.326077 | 2.124957  | -3.041300 |
| Mg | 1.344818  | 3.652186  | -2.695180 |
| Mg | -0.278805 | -4.017810 | -2.108859 |
| Mg | 4.460246  | -0.997649 | -1.999219 |
| Mg | 3.244154  | -4.329792 | -1.947799 |
| Mg | 4.336401  | 2.390925  | -1.246594 |
| Mg | -5.294113 | -0.209860 | -0.361683 |
| Mg | -3.530534 | 2.899248  | -0.149901 |
| Mg | -0.613294 | 4.824305  | -0.051194 |
| Mg | 2.878803  | 5.285356  | 0.132942  |
| Mg | -2.613230 | -4.891972 | 0.183712  |
| Mg | 6.186148  | 0.190997  | 0.882423  |
| Mg | 1.274641  | -4.723046 | 0.976406  |

|    |           |           |          |
|----|-----------|-----------|----------|
| Mg | 4.329825  | -2.826632 | 1.096096 |
| Mg | -3.675562 | -2.218609 | 1.994778 |
| Mg | 4.127751  | 2.706950  | 2.298098 |
| Mg | -3.746386 | 1.160142  | 2.875991 |
| Mg | -2.505483 | 4.465515  | 2.908248 |
| Mg | 1.057306  | 4.230609  | 3.022173 |
| Mg | -0.784695 | -3.598089 | 3.537263 |
| Mg | 4.074187  | -0.528209 | 3.699911 |
| Mg | 2.738954  | -3.840714 | 4.102354 |
| Mg | -0.906239 | 1.934105  | 4.856648 |
| Mg | 0.951424  | -1.008048 | 5.265432 |
| Mg | -2.635978 | -1.164589 | 5.285353 |
| Mg | 2.588778  | 2.161478  | 5.476951 |

Al18Mg32

|    |           |           |           |
|----|-----------|-----------|-----------|
| Al | -0.369821 | 0.120483  | -3.740343 |
| Al | 2.235611  | 0.072108  | -2.543955 |
| Al | 0.657547  | 2.460201  | -2.453674 |
| Al | 0.474762  | -2.139594 | -2.219673 |
| Al | -2.076651 | 1.702262  | -2.065095 |
| Al | -2.174217 | -1.138155 | -1.925519 |
| Al | -0.024295 | 0.265547  | -1.122743 |
| Al | 2.178787  | 1.630806  | -0.194062 |
| Al | 2.015590  | -1.206216 | -0.032953 |
| Al | -0.563151 | 2.667358  | 0.110457  |
| Al | -0.695936 | -1.939632 | 0.336297  |
| Al | -2.269576 | 0.413828  | 0.442942  |
| Al | 0.341335  | 0.469494  | 1.474930  |
| Al | 2.864117  | 0.203332  | 2.230007  |
| Al | 1.058008  | -1.955586 | 2.488114  |
| Al | -1.532331 | 1.865456  | 2.718311  |
| Al | -1.575158 | -0.960045 | 2.780542  |
| Al | 0.582640  | 0.344934  | 4.071547  |
| Mg | 1.927538  | 1.719125  | -5.268807 |
| Mg | 1.789309  | -1.777168 | -5.105020 |
| Mg | -1.297348 | 2.938298  | -4.910652 |
| Mg | -1.537735 | -2.708262 | -4.628275 |
| Mg | -3.452918 | 0.204557  | -4.522965 |
| Mg | 4.837467  | -0.134414 | -4.157714 |
| Mg | 1.046259  | -4.899830 | -3.438748 |
| Mg | -4.424725 | 3.366657  | -3.129526 |
| Mg | -4.632970 | -2.752705 | -2.808409 |
| Mg | 3.848077  | 2.854858  | -2.545665 |
| Mg | 3.611073  | -2.826638 | -2.199954 |
| Mg | -1.434990 | 4.851947  | -1.958956 |
| Mg | -1.781175 | -4.296478 | -1.412366 |
| Mg | -4.913447 | 0.395936  | -1.253243 |
| Mg | 4.865659  | -0.025722 | -0.543370 |
| Mg | 1.744229  | 4.770990  | -0.534258 |
| Mg | 1.404265  | -4.290040 | 0.126541  |
| Mg | -3.679182 | 3.204652  | 0.405321  |
| Mg | -3.810312 | -2.318610 | 0.705594  |
| Mg | 4.650428  | 2.708277  | 1.451180  |
| Mg | 4.161835  | -2.650269 | 1.728530  |
| Mg | -1.349103 | 4.976241  | 2.117547  |
| Mg | -1.310033 | -4.173223 | 2.411349  |
| Mg | 1.489417  | 3.201579  | 2.512694  |
| Mg | -4.445385 | 0.604000  | 2.684387  |
| Mg | 1.941285  | -4.677077 | 3.623610  |
| Mg | -3.784147 | -2.512281 | 4.259368  |
| Mg | 3.050157  | -1.575804 | 4.900076  |
| Mg | 3.271048  | 1.785201  | 4.955977  |
| Mg | -0.322051 | -2.418782 | 5.334785  |
| Mg | -0.270270 | 3.124023  | 5.349421  |
| Mg | -2.319519 | 0.454381  | 5.496416  |

Al19Mg31

|    |           |           |           |
|----|-----------|-----------|-----------|
| Al | 1.700131  | -0.386051 | -3.037845 |
| Al | -1.019063 | -0.386951 | -2.291976 |
| Al | 0.486382  | -2.762395 | -1.997561 |
| Al | -2.142594 | 2.143079  | -1.756313 |
| Al | 0.656578  | 1.826373  | -1.635406 |

|    |           |           |           |
|----|-----------|-----------|-----------|
| Al | 3.147103  | -2.036227 | -1.167819 |
| Al | 3.208797  | 0.833471  | -0.930990 |
| Al | -3.360681 | -0.230368 | -0.714577 |
| Al | 1.036831  | -0.646839 | -0.465674 |
| Al | -1.303855 | -2.010393 | 0.057997  |
| Al | -1.058324 | 0.732125  | 0.233099  |
| Al | -0.638364 | 3.365480  | 0.352072  |
| Al | 1.240850  | -3.009604 | 0.758736  |
| Al | -3.168324 | 2.120283  | 0.938424  |
| Al | 1.412764  | 1.577846  | 1.122351  |
| Al | 2.922807  | -0.788106 | 1.417602  |
| Al | -2.603574 | -0.479417 | 2.040841  |
| Al | 0.199815  | -0.793330 | 2.164734  |
| Al | -0.921665 | 1.742097  | 2.699831  |
| Mg | 2.433126  | -0.065059 | -5.990439 |
| Mg | -0.413713 | -1.936075 | -4.942623 |
| Mg | -0.422757 | 1.679148  | -4.581604 |
| Mg | 2.807209  | -3.171623 | -4.127281 |
| Mg | -3.360391 | 3.747775  | -4.058484 |
| Mg | -3.662751 | 0.202243  | -3.859083 |
| Mg | 2.972839  | 2.537252  | -3.615678 |
| Mg | 4.876806  | -0.437914 | -3.316549 |
| Mg | -2.801960 | -2.969049 | -2.542029 |
| Mg | -0.276069 | 4.675626  | -2.532095 |
| Mg | -5.313891 | 2.173386  | -1.418951 |
| Mg | 2.455970  | -5.145845 | -1.280439 |
| Mg | -3.244380 | 4.906993  | -0.608101 |
| Mg | 2.525339  | 4.067442  | -0.454732 |
| Mg | -0.970682 | -5.090863 | -0.383251 |
| Mg | 5.797926  | -0.731789 | 0.028568  |
| Mg | -4.218349 | -2.953382 | 0.699637  |
| Mg | 4.312553  | -3.653441 | 1.309445  |
| Mg | -5.663518 | 0.198176  | 1.427331  |
| Mg | 4.443326  | 2.060059  | 1.737687  |
| Mg | 1.439088  | -5.724617 | 2.157631  |
| Mg | -2.321835 | 4.612081  | 2.736704  |
| Mg | 1.195441  | 4.197606  | 2.820883  |
| Mg | -1.336189 | -3.465686 | 2.833195  |
| Mg | 5.081179  | -0.914560 | 3.583930  |
| Mg | 2.006547  | -2.668325 | 3.875078  |
| Mg | -3.820487 | 1.699332  | 4.021990  |
| Mg | -4.372265 | -1.900002 | 4.095386  |
| Mg | 1.979146  | 0.913072  | 4.131953  |
| Mg | -1.192593 | -0.563062 | 4.941989  |
| Mg | -0.730279 | 2.910028  | 5.522406  |

#### Al20Mg30

|    |           |           |           |
|----|-----------|-----------|-----------|
| Al | 2.590641  | -0.465892 | -3.974036 |
| Al | 0.296187  | 0.521410  | -3.024977 |
| Al | 1.319933  | -2.153379 | -2.320568 |
| Al | -1.498863 | -1.560906 | -2.200451 |
| Al | 2.729138  | 0.272282  | -1.409756 |
| Al | -1.834362 | 1.091624  | -1.282919 |
| Al | 0.764648  | 2.213792  | -0.810431 |
| Al | 0.312301  | -0.497181 | -0.547175 |
| Al | -0.242833 | -3.081862 | -0.109707 |
| Al | -1.541259 | 3.445500  | 0.250438  |
| Al | 2.359755  | -1.956044 | 0.361017  |
| Al | -2.170491 | -1.115910 | 0.500391  |
| Al | -3.362009 | 1.385940  | 1.067048  |
| Al | -0.709525 | 1.105581  | 1.239362  |
| Al | 2.021536  | 0.696849  | 1.276795  |
| Al | 0.839908  | 3.201775  | 1.831137  |
| Al | 0.205664  | -1.359225 | 2.077703  |
| Al | -1.733422 | 2.720358  | 3.030818  |
| Al | -2.104551 | -0.132852 | 3.149939  |
| Al | 0.490948  | 0.991495  | 3.624714  |
| Mg | 0.897348  | 1.318418  | -5.986054 |
| Mg | -0.197884 | -1.829415 | -5.120103 |
| Mg | 2.766680  | -3.546989 | -4.714808 |
| Mg | -2.602205 | 0.668265  | -4.295748 |
| Mg | -3.575514 | -2.740109 | -4.111558 |
| Mg | 2.515085  | 2.824808  | -3.352688 |

|    |           |           |           |
|----|-----------|-----------|-----------|
| Mg | 5.323639  | 0.865199  | -3.047132 |
| Mg | -0.985965 | 3.577440  | -3.036742 |
| Mg | -0.650316 | -4.551667 | -2.924702 |
| Mg | 4.501055  | -2.310686 | -2.000656 |
| Mg | -4.206560 | 3.128512  | -1.491886 |
| Mg | -4.567787 | -0.438176 | -1.432020 |
| Mg | 2.279206  | -4.851700 | -0.980073 |
| Mg | -3.348241 | -3.736360 | -0.704503 |
| Mg | 0.916270  | 5.335427  | -0.557542 |
| Mg | 3.655963  | 3.102275  | 0.044921  |
| Mg | -0.879268 | -6.032193 | 0.393578  |
| Mg | 5.008632  | -0.111024 | 0.756773  |
| Mg | 4.727137  | -3.590395 | 1.400099  |
| Mg | -4.160982 | 4.375558  | 1.795742  |
| Mg | -4.898715 | -1.246371 | 2.044324  |
| Mg | -0.986001 | 5.748255  | 2.371485  |
| Mg | 1.383520  | -4.221037 | 2.436357  |
| Mg | -2.112710 | -3.407444 | 2.657077  |
| Mg | 3.397351  | 2.350051  | 3.555815  |
| Mg | 2.975953  | -1.210615 | 3.575662  |
| Mg | -4.587217 | 1.669583  | 3.986825  |
| Mg | 0.548219  | 3.893656  | 4.921685  |
| Mg | -0.193315 | -1.728232 | 5.167753  |
| Mg | -1.676722 | 1.371612  | 5.918775  |

#### Al21Mg29

|    |           |           |           |
|----|-----------|-----------|-----------|
| Al | -2.450353 | 0.171939  | 3.966477  |
| Al | -2.258974 | -0.066551 | -0.658328 |
| Al | -1.903343 | 1.567347  | 1.651468  |
| Al | -1.816221 | -1.305522 | 1.798272  |
| Al | -1.779311 | 1.174532  | -3.133911 |
| Al | -1.688747 | -1.687615 | -2.899593 |
| Al | -0.766357 | -1.993428 | 4.186795  |
| Al | -0.647992 | 2.291116  | -0.793650 |
| Al | -0.492442 | -2.339939 | -0.426683 |
| Al | 0.158726  | 0.115627  | 0.697579  |
| Al | 0.162752  | 0.388926  | 3.300799  |
| Al | 0.211802  | -0.104485 | -1.892041 |
| Al | 0.279001  | -0.319478 | -4.497972 |
| Al | 0.814986  | 2.556836  | 1.599802  |
| Al | 0.918276  | 2.145082  | -3.144028 |
| Al | 0.941731  | -2.095151 | 2.024049  |
| Al | 1.066049  | -2.484959 | -2.760304 |
| Al | 2.105771  | 1.495121  | -0.670651 |
| Al | 2.191926  | -1.366370 | -0.422031 |
| Al | 2.588567  | 0.283284  | 1.835833  |
| Al | 2.678662  | -0.119756 | -2.912288 |
| Mg | -4.679914 | -0.043326 | 1.414250  |
| Mg | -4.585411 | -0.321220 | -2.738198 |
| Mg | -4.239464 | 2.727133  | 3.383559  |
| Mg | -3.908177 | -2.754779 | 3.527264  |
| Mg | -3.783812 | 2.654426  | -0.872324 |
| Mg | -3.593023 | -2.918285 | -0.459350 |
| Mg | -2.866827 | -1.639375 | 6.532566  |
| Mg | -2.672649 | -0.506108 | -5.682390 |
| Mg | -1.573452 | 4.661166  | 1.055371  |
| Mg | -1.417260 | 4.347429  | -3.027170 |
| Mg | -1.285062 | -4.413181 | 1.859612  |
| Mg | -1.112232 | -4.783461 | -2.280648 |
| Mg | -0.951828 | 3.160698  | 4.261122  |
| Mg | -0.701288 | 2.389073  | -5.866856 |
| Mg | -0.525283 | -3.268039 | -5.400256 |
| Mg | -0.199475 | 0.414101  | 6.359421  |
| Mg | 1.297758  | -4.402036 | 4.111141  |
| Mg | 1.505142  | 4.574252  | -0.958251 |
| Mg | 1.545590  | 5.332942  | 2.638817  |
| Mg | 1.776047  | -4.476917 | -0.129902 |
| Mg | 2.462366  | -1.230258 | 4.703958  |
| Mg | 2.486346  | 2.263369  | 4.329536  |
| Mg | 2.664870  | 1.413244  | -5.699750 |
| Mg | 2.775378  | -2.081492 | -5.410376 |
| Mg | 3.988804  | 3.091620  | 1.244720  |
| Mg | 4.040264  | 2.778284  | -2.771075 |

|    |          |           |           |
|----|----------|-----------|-----------|
| Mg | 4.088568 | -2.529904 | 1.814838  |
| Mg | 4.200418 | -2.879973 | -2.290181 |
| Mg | 4.949095 | 0.134063  | -0.499043 |

#### Al22Mg28

|    |           |           |           |
|----|-----------|-----------|-----------|
| Al | -3.617806 | 0.276046  | 0.572773  |
| Al | -3.117358 | -2.418006 | -0.442774 |
| Al | -2.608577 | -1.737409 | 2.386432  |
| Al | -2.375970 | -0.135696 | -2.023917 |
| Al | -1.544397 | 0.921392  | 2.464666  |
| Al | -1.466068 | 1.920193  | -0.180509 |
| Al | -1.217604 | -0.808711 | 0.352789  |
| Al | -0.752397 | -3.390714 | 0.908789  |
| Al | -0.580600 | -2.361972 | -1.788347 |
| Al | -0.195411 | -0.637387 | -3.967000 |
| Al | 0.071813  | 3.207333  | 1.788999  |
| Al | 0.189066  | -1.345643 | 2.669743  |
| Al | 0.282394  | 0.304446  | -1.590490 |
| Al | 0.786974  | 0.783839  | 1.013539  |
| Al | 1.072656  | 1.187080  | 3.599804  |
| Al | 1.246077  | 2.741943  | -0.829944 |
| Al | 1.362980  | -1.773305 | 0.138948  |
| Al | 2.057639  | -1.557693 | -2.488038 |
| Al | 2.114610  | 1.197763  | -3.205475 |
| Al | 2.842215  | 2.316676  | 1.521669  |
| Al | 2.864822  | -0.517049 | 2.101023  |
| Al | 2.921575  | 0.420336  | -0.633931 |
| Mg | -5.643550 | -1.977763 | 1.465657  |
| Mg | -5.441876 | -0.813028 | -1.861808 |
| Mg | -4.428377 | 0.552303  | 3.652183  |
| Mg | -4.185495 | 2.485684  | -1.648948 |
| Mg | -3.497152 | -4.729566 | 1.715114  |
| Mg | -3.319982 | 3.432202  | 1.799603  |
| Mg | -2.961027 | -2.733309 | -3.743501 |
| Mg | -2.942090 | 0.463187  | -5.050287 |
| Mg | -1.905553 | -5.205456 | -1.431052 |
| Mg | -1.345154 | -0.487155 | 5.255440  |
| Mg | -1.225933 | 3.096372  | 4.707857  |
| Mg | -1.021929 | 2.623067  | -3.221947 |
| Mg | -1.019473 | 5.000995  | -0.605331 |
| Mg | -0.972389 | -3.902883 | 4.063311  |
| Mg | 0.550150  | -3.686082 | -4.396997 |
| Mg | 0.648232  | 1.660373  | -5.967198 |
| Mg | 1.599735  | -4.593502 | -1.132489 |
| Mg | 1.930500  | 4.334338  | -3.444128 |
| Mg | 2.094731  | 4.170058  | 4.016463  |
| Mg | 2.170291  | -1.406365 | 5.099061  |
| Mg | 2.210239  | -3.770434 | 2.381789  |
| Mg | 2.261644  | 5.307270  | 0.677624  |
| Mg | 2.641446  | -1.045547 | -5.493295 |
| Mg | 4.192586  | 1.379493  | 4.249666  |
| Mg | 4.357423  | 3.081105  | -1.331005 |
| Mg | 4.384882  | -2.380887 | -0.214556 |
| Mg | 4.950290  | -0.190386 | -2.946569 |
| Mg | 5.581196  | 0.742454  | 1.036595  |

#### Al23Mg27

|    |           |           |           |
|----|-----------|-----------|-----------|
| Al | 1.327124  | -0.671589 | -3.324210 |
| Al | -0.915798 | 0.423804  | -2.103516 |
| Al | 1.538200  | 1.826698  | -1.899044 |
| Al | -0.489553 | -2.367542 | -1.861253 |
| Al | 3.629717  | -0.110462 | -1.602599 |
| Al | 2.329832  | -2.799295 | -1.578337 |
| Al | -1.002348 | 3.143647  | -1.541290 |
| Al | -3.097095 | -1.189079 | -1.502291 |
| Al | 1.245971  | -0.608378 | -0.665026 |
| Al | -2.744687 | 1.325730  | -0.135376 |
| Al | 1.269141  | 3.755369  | 0.204154  |
| Al | -2.153306 | -3.323707 | 0.267795  |
| Al | -0.043320 | 1.503126  | 0.321735  |
| Al | -1.202619 | -0.894819 | 0.343318  |
| Al | 2.668922  | 1.303487  | 0.698071  |

|    |           |           |           |
|----|-----------|-----------|-----------|
| Al | 0.641175  | -2.890879 | 0.735847  |
| Al | 3.175502  | -1.526844 | 0.920950  |
| Al | -1.476544 | 3.434132  | 1.334752  |
| Al | -3.598984 | -0.955994 | 1.374297  |
| Al | 0.915874  | -0.423891 | 2.103524  |
| Al | -1.613956 | 0.802402  | 2.461791  |
| Al | 0.845795  | 2.288217  | 2.703938  |
| Al | -1.248879 | -2.044443 | 2.742919  |
| Mg | -0.105408 | 2.083494  | -4.595960 |
| Mg | -1.730717 | -1.278284 | -4.565699 |
| Mg | 3.453447  | 1.485973  | -4.356011 |
| Mg | 0.949676  | -3.692926 | -4.309229 |
| Mg | 4.074910  | -2.007285 | -4.123235 |
| Mg | -3.538101 | 1.682014  | -3.182393 |
| Mg | 1.413430  | 4.827313  | -2.794371 |
| Mg | -2.924877 | -4.146082 | -2.713760 |
| Mg | 4.274213  | 3.180223  | -1.220181 |
| Mg | 0.154073  | -5.342317 | -1.143382 |
| Mg | 5.451576  | -2.644042 | -0.961740 |
| Mg | -3.874923 | 4.208731  | -0.616908 |
| Mg | -5.709457 | 0.414257  | -0.582649 |
| Mg | -0.853867 | 6.064892  | -0.350739 |
| Mg | -5.285814 | -3.102115 | -0.268363 |
| Mg | 5.684508  | 0.453741  | 0.768199  |
| Mg | 3.180980  | -4.725154 | 0.814862  |
| Mg | 3.644127  | 3.794959  | 2.329845  |
| Mg | -4.428311 | 2.162091  | 2.363532  |
| Mg | -0.694265 | -5.178542 | 2.410582  |
| Mg | 0.522280  | 5.427763  | 2.810878  |
| Mg | -3.909525 | -3.739018 | 2.893212  |
| Mg | 3.477503  | 0.425437  | 3.633353  |
| Mg | 1.852136  | -2.936494 | 3.663613  |
| Mg | -1.644152 | 3.176056  | 4.507580  |
| Mg | -3.478384 | -0.618162 | 4.541804  |
| Mg | 0.044779  | 0.023788  | 5.047010  |

#### Al24Mg26

|    |           |           |           |
|----|-----------|-----------|-----------|
| Al | -1.451916 | -0.016065 | -3.343239 |
| Al | 0.091546  | 2.150770  | -2.178243 |
| Al | 0.981881  | -0.530978 | -2.066731 |
| Al | -2.776650 | 2.147983  | -1.858367 |
| Al | 2.871113  | 1.454320  | -1.745697 |
| Al | -1.177258 | -2.233878 | -1.624849 |
| Al | -3.593729 | -0.721776 | -1.451924 |
| Al | 1.453719  | -3.134152 | -1.161761 |
| Al | -1.315824 | 0.338457  | -0.695690 |
| Al | -3.270524 | -3.441613 | -0.563273 |
| Al | 1.613369  | 3.634885  | -0.249204 |
| Al | 2.928821  | -0.893838 | -0.048196 |
| Al | 1.068239  | 1.124160  | 0.184009  |
| Al | -1.076081 | 2.843602  | 0.367275  |
| Al | 0.305737  | -1.401593 | 0.521687  |
| Al | -0.714234 | -3.811801 | 0.709916  |
| Al | -3.367130 | 1.120474  | 0.832146  |
| Al | -2.386269 | -1.516381 | 1.011106  |
| Al | 3.435956  | 1.679149  | 1.119084  |
| Al | 1.994249  | -2.971606 | 1.723423  |
| Al | -0.919022 | 0.597002  | 2.077553  |
| Al | 0.966427  | 2.584443  | 2.406730  |
| Al | 1.761234  | -0.201040 | 2.497359  |
| Al | -0.461340 | -1.997703 | 3.013651  |
| Mg | 1.454666  | 0.919692  | -4.759770 |
| Mg | -1.603371 | 2.857699  | -4.726300 |
| Mg | 0.395530  | -2.641586 | -4.302165 |
| Mg | -4.398386 | 0.665318  | -4.190870 |
| Mg | -3.304032 | -2.780490 | -3.822981 |
| Mg | 2.209249  | 4.153060  | -3.333240 |
| Mg | 3.742350  | -1.535206 | -3.042294 |
| Mg | -0.954254 | -5.302435 | -2.058506 |
| Mg | -1.023635 | 5.048231  | -1.843565 |
| Mg | -5.821221 | 1.509697  | -1.088982 |
| Mg | 4.740828  | 3.825785  | -0.846641 |
| Mg | 5.707930  | 0.398811  | -0.706761 |

|    |           |           |           |
|----|-----------|-----------|-----------|
| Mg | 4.450199  | -3.638468 | -0.181524 |
| Mg | -3.898129 | 4.219418  | 0.276243  |
| Mg | 1.684816  | -5.862743 | 0.376319  |
| Mg | -5.492489 | -1.481555 | 0.948458  |
| Mg | -0.087925 | 5.516010  | 1.674821  |
| Mg | 3.326689  | 4.664820  | 2.236444  |
| Mg | 4.740317  | -1.136854 | 2.483649  |
| Mg | -3.142438 | -4.003718 | 2.712633  |
| Mg | -2.242707 | 3.113470  | 3.300557  |
| Mg | 0.262199  | -5.018478 | 3.478227  |
| Mg | -3.320032 | -0.436674 | 3.798611  |
| Mg | 3.410617  | 1.761750  | 4.301501  |
| Mg | 2.155729  | -2.276888 | 4.821242  |
| Mg | 0.045185  | 0.658511  | 5.018130  |

#### Al25Mg25

|    |           |           |           |
|----|-----------|-----------|-----------|
| Al | -4.400093 | 1.100748  | -1.513442 |
| Al | -3.811071 | -0.080166 | 1.058648  |
| Al | -2.547843 | -0.771687 | -1.409928 |
| Al | -2.429449 | -2.652875 | 0.700017  |
| Al | -2.273906 | 1.963997  | -0.216757 |
| Al | -2.014940 | -1.204741 | 3.224491  |
| Al | -1.997302 | 1.664155  | 2.582901  |
| Al | -1.991735 | 1.526762  | -3.043034 |
| Al | -1.202036 | -0.288153 | 0.936576  |
| Al | -0.590627 | -1.045563 | -3.443817 |
| Al | -0.209258 | -2.180662 | -0.895530 |
| Al | -0.204242 | 0.616535  | -1.366699 |
| Al | -0.155616 | 3.298051  | -1.549372 |
| Al | 0.223174  | 2.138757  | 0.988383  |
| Al | 0.234628  | -2.424300 | 1.877758  |
| Al | 0.498446  | 0.211504  | 3.027372  |
| Al | 1.009154  | 1.439036  | -3.531163 |
| Al | 1.418320  | -0.364619 | 0.510455  |
| Al | 1.922165  | -0.902228 | -2.136896 |
| Al | 2.196108  | 1.833472  | -0.943752 |
| Al | 2.371335  | -2.792937 | -0.080640 |
| Al | 2.803419  | 1.524084  | 1.802195  |
| Al | 2.860224  | -1.346941 | 2.431757  |
| Al | 3.749600  | 0.862672  | -2.838926 |
| Al | 3.939145  | -0.306419 | -0.201754 |
| Mg | -5.335195 | -2.036196 | -0.884293 |
| Mg | -4.852683 | -2.603443 | 2.686115  |
| Mg | -4.841978 | 2.889555  | 1.264164  |
| Mg | -4.532778 | 0.591911  | 4.079859  |
| Mg | -3.830809 | -0.728876 | -4.241874 |
| Mg | -3.336333 | 4.207937  | -2.088634 |
| Mg | -2.414244 | -3.706402 | -2.494888 |
| Mg | -1.774773 | -4.368486 | 3.312186  |
| Mg | -1.573928 | 4.685695  | 1.165165  |
| Mg | -1.257492 | 0.799469  | 5.566272  |
| Mg | -0.947443 | 0.770181  | -5.963124 |
| Mg | -0.626013 | 3.978765  | -4.563714 |
| Mg | -0.118954 | -5.074299 | 0.177541  |
| Mg | 0.716310  | 3.271904  | 3.817807  |
| Mg | 0.739372  | -2.232247 | 4.948329  |
| Mg | 1.285408  | -3.814395 | -3.096598 |
| Mg | 2.125513  | 4.577696  | 0.563436  |
| Mg | 2.242507  | -0.906450 | -5.229678 |
| Mg | 2.480951  | -4.492564 | 2.620296  |
| Mg | 2.737102  | 4.030351  | -3.076612 |
| Mg | 2.998247  | 0.675287  | 4.874234  |
| Mg | 4.655956  | -2.327945 | -2.509076 |
| Mg | 5.149179  | 2.597797  | -0.360767 |
| Mg | 5.297345  | -2.899550 | 1.035772  |
| Mg | 5.617131  | 0.295824  | 2.429241  |

#### Al26Mg24

|    |           |           |           |
|----|-----------|-----------|-----------|
| Al | -1.908297 | -1.454923 | -4.138837 |
| Al | 0.033744  | 0.683324  | -3.899505 |
| Al | 2.510224  | -0.340552 | -2.650870 |
| Al | 0.067996  | -1.791952 | -2.434459 |



|    |           |           |           |
|----|-----------|-----------|-----------|
| Al | 1.918157  | 2.540778  | -2.353541 |
| Al | -1.017792 | 2.805535  | -2.130094 |
| Al | -2.161189 | 0.195968  | -2.105417 |
| Al | -2.548487 | -2.600584 | -1.554499 |
| Al | 0.411198  | 0.679109  | -1.317255 |
| Al | -0.095514 | -3.654422 | -0.284512 |
| Al | 1.770673  | -1.579003 | -0.261406 |
| Al | 2.862727  | 0.962656  | -0.141870 |
| Al | -1.024629 | -1.146934 | -0.013296 |
| Al | 3.187315  | 3.567540  | 0.041419  |
| Al | 0.633436  | 2.950505  | 0.187201  |
| Al | -3.623492 | -0.508270 | 0.236261  |
| Al | -1.770653 | 1.578909  | 0.261348  |
| Al | 0.613509  | 0.467681  | 1.330515  |
| Al | -2.315665 | -2.843824 | 1.491479  |
| Al | 0.413210  | -2.152651 | 2.082686  |
| Al | 2.877386  | -0.724240 | 2.154145  |
| Al | 2.281929  | 2.160576  | 2.408068  |
| Al | -1.816047 | -0.164748 | 2.411773  |
| Al | -0.650733 | 2.421816  | 2.674965  |
| Al | 0.630257  | 0.059886  | 3.908091  |
| Al | -1.278908 | -2.112620 | 4.097480  |
| Mg | 1.186804  | -1.866183 | -5.332859 |
| Mg | 2.860099  | 1.424435  | -5.197807 |
| Mg | 0.265415  | 3.738226  | -4.814828 |
| Mg | -2.817722 | 1.704766  | -4.741845 |
| Mg | -0.938021 | -4.568112 | -3.403551 |
| Mg | -4.942339 | -0.997094 | -2.812360 |
| Mg | 2.543123  | -3.710636 | -2.395493 |
| Mg | 4.988962  | 1.881619  | -2.213735 |
| Mg | 0.984504  | 5.452475  | -1.622449 |
| Mg | -4.287322 | 2.380712  | -1.387397 |
| Mg | 4.871915  | -1.415256 | -0.485475 |
| Mg | -2.597162 | -5.515754 | -0.241910 |
| Mg | -5.191759 | -3.201905 | 0.141134  |
| Mg | -1.958797 | 4.675848  | 0.522981  |
| Mg | 2.830886  | -4.011061 | 1.368275  |
| Mg | 5.288264  | 1.568544  | 1.704108  |
| Mg | 1.283617  | 5.139659  | 2.294985  |
| Mg | -3.999824 | 2.080044  | 2.376651  |
| Mg | -0.468220 | -5.058877 | 2.742287  |
| Mg | -4.472710 | -1.487886 | 3.333353  |
| Mg | 1.955774  | -2.669682 | 4.730561  |
| Mg | 3.628890  | 0.620864  | 4.865347  |
| Mg | 1.034145  | 2.934645  | 5.248387  |
| Mg | -2.048877 | 0.901045  | 5.321772  |

#### Al<sub>27</sub>Mg<sub>23</sub>

|    |           |           |           |
|----|-----------|-----------|-----------|
| Al | -3.811702 | 1.009594  | -0.447037 |
| Al | -3.420663 | -1.991975 | 0.171918  |
| Al | -2.912655 | 3.732560  | -0.883773 |
| Al | -2.908673 | 0.079572  | 2.248086  |
| Al | -2.596173 | -0.802939 | -2.445170 |
| Al | -1.848146 | -4.351767 | 0.736629  |
| Al | -1.676915 | 2.326958  | 0.993101  |
| Al | -1.527359 | -0.218196 | -0.019601 |
| Al | -1.505420 | 1.760679  | -1.877922 |
| Al | -1.099983 | -2.106311 | 1.891708  |
| Al | -0.968944 | 0.769384  | -4.277862 |
| Al | -0.921187 | -2.684646 | -1.071435 |
| Al | -0.137423 | 0.459935  | 2.352632  |
| Al | -0.017933 | 3.889279  | -0.788300 |
| Al | 0.159855  | -0.478488 | -2.259610 |
| Al | 0.607674  | 1.402379  | -0.211710 |
| Al | 0.938554  | -1.198777 | 0.318180  |
| Al | 0.942469  | 3.002628  | 1.901624  |
| Al | 0.985963  | -3.761498 | 0.793159  |
| Al | 1.172842  | 2.058181  | -2.784279 |
| Al | 1.551660  | -1.703711 | 2.872139  |
| Al | 1.834565  | -2.629722 | -1.794899 |
| Al | 2.521946  | 0.642792  | 1.565780  |
| Al | 2.692503  | 0.058409  | -1.396760 |
| Al | 2.826020  | 2.749477  | -0.390144 |

|    |           |           |           |
|----|-----------|-----------|-----------|
| Al | 3.435759  | -1.901996 | 0.572542  |
| Al | 4.738678  | 0.648045  | 0.143738  |
| Mg | -5.888833 | -0.455675 | 1.487845  |
| Mg | -5.657279 | -1.108470 | -1.951126 |
| Mg | -4.579986 | 2.962218  | 1.899333  |
| Mg | -4.088142 | 1.878096  | -3.551550 |
| Mg | -3.800505 | -3.035574 | 3.113444  |
| Mg | -3.460647 | -4.046527 | -2.208936 |
| Mg | -1.589183 | 2.580371  | 4.109929  |
| Mg | -1.420838 | 5.360078  | 1.615270  |
| Mg | -1.130386 | 4.123470  | -3.817524 |
| Mg | -1.117333 | -1.106499 | 4.858186  |
| Mg | -0.645990 | -2.674412 | -4.270984 |
| Mg | -0.155799 | -4.500868 | 3.626526  |
| Mg | 0.162266  | -5.519335 | -1.690822 |
| Mg | 1.905449  | 1.187640  | 4.586232  |
| Mg | 2.151128  | 5.646846  | 0.764609  |
| Mg | 2.246831  | -0.477690 | -4.531608 |
| Mg | 2.325232  | 4.950694  | -2.669139 |
| Mg | 3.431530  | -4.187430 | 2.810425  |
| Mg | 3.642271  | -4.870486 | -0.604724 |
| Mg | 4.259871  | 3.082503  | 2.388208  |
| Mg | 4.534794  | 2.022523  | -2.928422 |
| Mg | 4.766132  | -0.765214 | 3.183264  |
| Mg | 5.054104  | -1.806101 | -2.131170 |

#### Al28Mg22

|    |           |           |           |
|----|-----------|-----------|-----------|
| Al | 0.418566  | 1.257550  | -3.347470 |
| Al | -3.182327 | -1.859042 | -2.956011 |
| Al | -2.432088 | 0.954283  | -2.832344 |
| Al | 3.234488  | 1.262768  | -2.788215 |
| Al | -0.657305 | -1.235542 | -2.543883 |
| Al | -0.974490 | 3.358377  | -1.862091 |
| Al | 1.164913  | -3.092710 | -1.463443 |
| Al | 1.680872  | -0.361503 | -1.442453 |
| Al | 1.571242  | 2.373738  | -1.025568 |
| Al | -1.664531 | -3.343011 | -0.951594 |
| Al | -0.678319 | 0.953883  | -0.837706 |
| Al | -2.805471 | -0.768768 | -0.589161 |
| Al | 0.813865  | 4.795511  | -0.257402 |
| Al | -3.036028 | 2.050831  | -0.212713 |
| Al | 3.604962  | 0.752803  | 0.149271  |
| Al | -0.233929 | -1.415789 | 0.209213  |
| Al | 2.386897  | -1.806704 | 0.722821  |
| Al | -0.544930 | 2.891130  | 1.049060  |
| Al | 0.284931  | -3.758281 | 1.238417  |
| Al | 1.150699  | 0.776852  | 1.307787  |
| Al | 2.390390  | 3.201996  | 1.369659  |
| Al | -1.767343 | 0.405444  | 1.664954  |
| Al | -2.245978 | -2.348888 | 1.712196  |
| Al | 0.202006  | -1.252583 | 2.859725  |
| Al | 2.973855  | -0.355700 | 2.916204  |
| Al | 2.218511  | -2.992214 | 3.097624  |
| Al | -0.296519 | 1.506434  | 3.570027  |
| Al | 2.229107  | 2.037867  | 3.727279  |
| Mg | -1.471969 | -0.508049 | -5.459559 |
| Mg | -1.471312 | 3.117435  | -4.998734 |
| Mg | 1.953231  | -1.424533 | -4.368438 |
| Mg | -0.857505 | -4.006770 | -3.939592 |
| Mg | 1.702498  | 4.235324  | -3.482684 |
| Mg | -4.042797 | 3.706504  | -2.670644 |
| Mg | -5.387220 | 0.379102  | -1.904859 |
| Mg | 4.387453  | -1.785255 | -1.812689 |
| Mg | 0.104935  | -6.003765 | -1.028125 |
| Mg | 4.396176  | 3.719572  | -1.016591 |
| Mg | -4.753257 | -3.186681 | -0.353231 |
| Mg | -2.392879 | 5.273338  | 0.204598  |
| Mg | 3.192693  | -4.800905 | 0.512157  |
| Mg | -2.422798 | -5.447118 | 1.337136  |
| Mg | 5.383142  | -1.759394 | 1.582488  |
| Mg | -4.829032 | -0.123200 | 1.708731  |
| Mg | 5.160506  | 2.014052  | 2.557549  |
| Mg | -3.110180 | 2.968262  | 2.923424  |

|    |           |           |          |
|----|-----------|-----------|----------|
| Mg | 0.453962  | 4.732065  | 3.341235 |
| Mg | -0.729169 | -3.912114 | 4.217325 |
| Mg | -2.444257 | -0.715144 | 4.535208 |
| Mg | 1.371735  | -0.461455 | 5.631110 |

Al29Mg21

|    |           |           |           |
|----|-----------|-----------|-----------|
| Al | -0.720185 | -0.325231 | -4.734984 |
| Al | 1.741484  | 0.030896  | -3.890677 |
| Al | -1.803928 | 1.638315  | -3.349817 |
| Al | -1.301083 | -2.240223 | -3.069858 |
| Al | 3.816777  | -1.443447 | -2.866861 |
| Al | 0.837765  | 2.499709  | -2.436925 |
| Al | 1.392509  | -2.232489 | -2.066495 |
| Al | -0.145997 | 0.033070  | -1.945954 |
| Al | 2.740256  | 0.552397  | -1.466316 |
| Al | -2.785110 | -0.364114 | -1.353396 |
| Al | -1.604231 | 2.289495  | -0.788321 |
| Al | -0.911843 | -2.324099 | -0.460692 |
| Al | 3.690683  | -1.863161 | -0.132334 |
| Al | 0.952781  | 1.766426  | 0.143601  |
| Al | 0.116334  | 4.252189  | 0.191502  |
| Al | 1.307181  | -0.915140 | 0.286514  |
| Al | 1.397974  | -3.567676 | 0.550153  |
| Al | -1.123187 | 0.097302  | 0.728311  |
| Al | -3.456211 | 1.219827  | 1.134779  |
| Al | 3.312288  | 0.727031  | 1.262803  |
| Al | -1.378790 | -4.196952 | 1.304189  |
| Al | -2.946856 | -1.729641 | 1.339831  |
| Al | -1.067170 | 2.506534  | 1.963154  |
| Al | -0.264888 | -2.020262 | 2.323536  |
| Al | 1.680830  | 3.040841  | 2.376630  |
| Al | 2.517740  | -1.780477 | 2.529564  |
| Al | 0.882051  | 0.458078  | 2.622214  |
| Al | -1.822347 | 0.104258  | 3.338076  |
| Al | -0.088333 | 2.119932  | 4.414215  |
| Mg | 0.428133  | 2.497743  | -5.544056 |
| Mg | 1.261384  | -2.856939 | -5.100213 |
| Mg | -3.846112 | -0.679477 | -4.289864 |
| Mg | 3.854885  | 2.318909  | -3.769346 |
| Mg | -1.333746 | 4.791045  | -2.668951 |
| Mg | -4.579383 | 2.228140  | -1.780433 |
| Mg | -0.226527 | -5.066124 | -1.776945 |
| Mg | 3.482301  | -4.543347 | -1.768327 |
| Mg | -3.641538 | -3.579492 | -1.203291 |
| Mg | 5.785428  | 0.388904  | -0.926589 |
| Mg | 3.344149  | 3.623725  | -0.418674 |
| Mg | -5.624146 | -0.780323 | -0.074324 |
| Mg | -3.146727 | 4.524233  | 0.771483  |
| Mg | 5.591045  | -1.199676 | 2.324420  |
| Mg | -0.379541 | 5.233793  | 3.308552  |
| Mg | -4.929887 | -0.405363 | 3.434423  |
| Mg | 1.073112  | -4.568041 | 3.519138  |
| Mg | -3.318639 | 2.783815  | 4.087853  |
| Mg | -2.529813 | -3.041035 | 4.188868  |
| Mg | 3.262645  | 1.097582  | 4.457785  |
| Mg | 0.506480  | -1.101460 | 5.282047  |

Al30Mg20

|    |           |           |           |
|----|-----------|-----------|-----------|
| Al | -3.950397 | 0.804049  | -0.445378 |
| Al | -3.780160 | -1.962769 | -0.780567 |
| Al | -2.990417 | -0.780990 | 1.570895  |
| Al | -2.633394 | 1.204197  | -2.822286 |
| Al | -2.485841 | -1.602272 | -3.144216 |
| Al | -1.717515 | 1.681079  | 0.966098  |
| Al | -1.558626 | -0.402708 | -0.878455 |
| Al | -1.520159 | 0.489316  | 3.529566  |
| Al | -1.432510 | -2.856187 | 0.413696  |
| Al | -1.388163 | -2.334171 | 3.170219  |
| Al | -0.473758 | 2.427100  | -4.100517 |
| Al | -0.400811 | 2.104261  | -1.423437 |
| Al | -0.370795 | 4.093596  | 0.537646  |
| Al | -0.292485 | 2.889436  | 3.013924  |

|    |           |           |           |
|----|-----------|-----------|-----------|
| Al | -0.243764 | -0.092201 | -3.351033 |
| Al | -0.160925 | -0.650522 | 1.465211  |
| Al | -0.086118 | -2.501132 | -1.981867 |
| Al | 1.075799  | 1.720907  | 0.948833  |
| Al | 1.183319  | -0.242776 | -0.948731 |
| Al | 1.222984  | 0.619593  | 3.500015  |
| Al | 1.331553  | -2.200148 | 3.135873  |
| Al | 1.333492  | -2.718542 | 0.346440  |
| Al | 1.921734  | 1.614321  | -2.844504 |
| Al | 1.967072  | 3.536886  | -0.864362 |
| Al | 1.984861  | 4.082175  | 1.866483  |
| Al | 2.175170  | -1.277126 | -3.230971 |
| Al | 2.685541  | -0.575269 | 1.449895  |
| Al | 3.435214  | 1.275765  | -0.488430 |
| Al | 3.458493  | 1.857930  | 2.298478  |
| Al | 3.590796  | -1.521110 | -0.919003 |
| Mg | -6.112616 | -0.895431 | 1.104354  |
| Mg | -5.411239 | -0.360177 | -3.021224 |
| Mg | -4.257476 | 1.999523  | 2.667866  |
| Mg | -4.017550 | -3.789870 | 1.914293  |
| Mg | -4.007730 | -1.183585 | 4.539152  |
| Mg | -3.121743 | 3.819251  | -1.058651 |
| Mg | -2.461775 | -4.606245 | -2.027188 |
| Mg | -2.208279 | 0.253149  | -5.804773 |
| Mg | -0.152450 | 5.133939  | -2.523939 |
| Mg | -0.094106 | -2.708816 | -5.115108 |
| Mg | -0.041273 | -1.142764 | 5.820820  |
| Mg | 0.100896  | -4.997910 | 2.182089  |
| Mg | 1.601102  | 0.594140  | -5.821705 |
| Mg | 2.241355  | 3.241801  | 4.931000  |
| Mg | 2.536383  | -4.276016 | -2.152223 |
| Mg | 3.970350  | -0.665283 | 4.332249  |
| Mg | 4.064302  | -3.395064 | 1.743225  |
| Mg | 4.844803  | 3.992478  | 0.389658  |
| Mg | 4.863202  | 0.414754  | -3.166332 |
| Mg | 5.783656  | -0.110558 | 1.076922  |

#### Al31Mg19

|    |           |           |           |
|----|-----------|-----------|-----------|
| Al | -4.276047 | -0.662743 | -0.771249 |
| Al | -3.420341 | -0.990151 | 1.906010  |
| Al | -3.338619 | 1.458979  | 0.644890  |
| Al | -2.701800 | -2.713098 | -1.587874 |
| Al | -2.605829 | 1.193347  | -2.035066 |
| Al | -2.604079 | 3.662418  | -0.756051 |
| Al | -1.828120 | -3.101416 | 1.043568  |
| Al | -1.752151 | 3.335563  | 1.856536  |
| Al | -1.638707 | -0.633872 | -0.154555 |
| Al | -1.339919 | -1.907205 | 3.442212  |
| Al | -1.240721 | 0.677260  | 2.400309  |
| Al | -0.953228 | -0.871059 | -2.812419 |
| Al | -0.630627 | 1.861135  | -0.147898 |
| Al | -0.070651 | 4.152956  | -1.542575 |
| Al | -0.042592 | 1.697246  | -2.852366 |
| Al | -0.026344 | -2.793040 | -1.077908 |
| Al | 0.415988  | -1.428355 | 1.399351  |
| Al | 0.756329  | -4.156439 | 1.100046  |
| Al | 0.821376  | 3.844343  | 1.070137  |
| Al | 0.932961  | -0.311212 | 3.905870  |
| Al | 1.096610  | -0.181985 | -0.983305 |
| Al | 1.170472  | -2.998114 | 3.507014  |
| Al | 1.377932  | 1.175665  | 1.613279  |
| Al | 1.665058  | -1.908613 | -3.020838 |
| Al | 1.993401  | 2.412206  | -1.051389 |
| Al | 2.486465  | 0.737108  | -3.165143 |
| Al | 2.565705  | -2.371910 | -0.114032 |
| Al | 2.965564  | -1.285546 | 2.339027  |
| Al | 3.415928  | 2.973902  | 1.109780  |
| Al | 3.523597  | 0.373305  | 0.246042  |
| Al | 3.993695  | -1.059811 | -1.966853 |
| Mg | -5.499543 | 2.298161  | -1.477362 |
| Mg | -4.932880 | -3.474571 | 0.591584  |
| Mg | -4.032128 | 1.739304  | 3.631436  |
| Mg | -3.918951 | -0.951649 | -3.958479 |

|    |           |           |           |
|----|-----------|-----------|-----------|
| Mg | -2.206848 | 3.739292  | -3.920290 |
| Mg | -1.620647 | 0.334827  | 5.601983  |
| Mg | -1.431603 | -5.619332 | -0.814540 |
| Mg | -1.240190 | -5.099455 | 3.424979  |
| Mg | -1.239621 | 6.220823  | 0.585244  |
| Mg | -0.793015 | -3.793117 | -3.994123 |
| Mg | 0.487555  | 2.902786  | 4.112178  |
| Mg | 0.510173  | -0.111224 | -5.478356 |
| Mg | 2.061111  | 3.813705  | -3.936621 |
| Mg | 2.177052  | -4.913011 | -1.864809 |
| Mg | 2.785130  | 5.485676  | -0.803758 |
| Mg | 3.713927  | -4.390112 | 2.141868  |
| Mg | 3.740894  | 1.364167  | 3.788619  |
| Mg | 5.053664  | 2.148483  | -1.815004 |
| Mg | 5.674616  | -1.875618 | 0.640903  |

#### Al32Mg18

|    |           |           |           |
|----|-----------|-----------|-----------|
| Al | -3.987879 | 1.034508  | -1.032090 |
| Al | -3.554311 | -0.613647 | 3.589656  |
| Al | -3.099001 | -1.697251 | -0.891439 |
| Al | -2.782234 | -2.649975 | 1.672739  |
| Al | -2.754378 | -0.349396 | -3.282344 |
| Al | -2.677077 | 0.162726  | 1.236110  |
| Al | -2.252332 | 2.417540  | -2.732603 |
| Al | -2.009655 | 2.733408  | 0.295616  |
| Al | -1.634558 | 1.618892  | 3.285609  |
| Al | -1.378318 | 0.479060  | -1.110597 |
| Al | -1.233731 | -3.882086 | -0.490597 |
| Al | -0.988677 | -1.088700 | 3.167847  |
| Al | -0.654245 | -1.468470 | 0.480098  |
| Al | -0.559334 | -1.869203 | -2.252703 |
| Al | -0.120002 | 0.566686  | -3.482183 |
| Al | -0.042548 | -3.561051 | 2.026851  |
| Al | 0.105618  | 1.191865  | 1.262649  |
| Al | 0.109920  | 3.191554  | -4.021815 |
| Al | 0.232495  | 2.529430  | -1.440573 |
| Al | 0.627044  | 3.880553  | 0.761356  |
| Al | 0.813374  | 2.976396  | 3.245878  |
| Al | 0.969351  | 0.499279  | 4.121946  |
| Al | 1.380272  | -0.021021 | -0.868180 |
| Al | 1.463624  | -1.152146 | 2.031558  |
| Al | 1.492302  | -2.740989 | -0.511025 |
| Al | 1.973296  | -1.235720 | -3.188395 |
| Al | 2.288387  | 1.761658  | -3.039376 |
| Al | 2.714960  | 1.259435  | 2.106732  |
| Al | 2.728399  | 2.260973  | -0.335706 |
| Al | 2.769654  | -3.417747 | 1.747804  |
| Al | 3.591756  | -1.018932 | 0.513853  |
| Al | 3.970329  | 0.138860  | -1.833747 |
| Mg | -5.564109 | -1.060100 | 1.026267  |
| Mg | -4.626348 | 2.343739  | 2.151308  |
| Mg | -2.917850 | -3.680620 | -3.296261 |
| Mg | -2.224080 | -3.557386 | 4.604224  |
| Mg | -2.051139 | 1.559021  | -5.784253 |
| Mg | -1.770508 | 4.755928  | 2.706049  |
| Mg | -1.561314 | 0.072818  | 6.055469  |
| Mg | -1.301339 | 5.246066  | -1.600707 |
| Mg | -0.578399 | -1.875513 | -5.373892 |
| Mg | 0.959874  | -4.431269 | -3.100922 |
| Mg | 1.247156  | -5.820450 | 0.231281  |
| Mg | 1.297520  | -2.715570 | 4.779944  |
| Mg | 1.809874  | 0.755775  | -5.924047 |
| Mg | 2.226311  | 4.869634  | -2.085024 |
| Mg | 3.494399  | 4.321735  | 2.021443  |
| Mg | 4.145968  | -1.069033 | 3.692007  |
| Mg | 4.308726  | -3.064500 | -1.797275 |
| Mg | 5.602757  | 1.413238  | 0.661458  |

#### Al33Mg17

|    |           |           |           |
|----|-----------|-----------|-----------|
| Al | -3.737201 | -1.447457 | -1.760278 |
| Al | -3.658052 | 1.116767  | -2.524426 |
| Al | -3.516326 | -2.122303 | 0.904095  |

|    |           |           |           |
|----|-----------|-----------|-----------|
| Al | -3.395345 | 3.051566  | -0.664439 |
| Al | -3.146902 | -0.089516 | 2.740976  |
| Al | -3.042169 | 2.480339  | 1.962786  |
| Al | -2.341663 | 0.464032  | -0.059708 |
| Al | -1.366696 | -2.150724 | -0.768058 |
| Al | -1.341586 | -0.317941 | -2.690525 |
| Al | -1.252861 | -3.000177 | -3.320750 |
| Al | -1.229407 | -4.088436 | 1.202316  |
| Al | -1.216272 | 2.276712  | -2.210154 |
| Al | -1.049102 | -1.425312 | 1.768931  |
| Al | -0.893409 | 2.967582  | 0.324242  |
| Al | -0.705484 | 1.130111  | 2.224478  |
| Al | -0.275832 | -0.666317 | 4.245204  |
| Al | -0.233744 | 3.662434  | 2.909975  |
| Al | 0.112357  | -4.407263 | -1.349997 |
| Al | 0.319343  | -1.181924 | -4.640124 |
| Al | 0.401692  | 0.357749  | -0.381577 |
| Al | 0.715264  | -3.012343 | 3.152353  |
| Al | 0.884712  | 4.904269  | 0.783085  |
| Al | 0.973786  | -2.626850 | 0.491022  |
| Al | 1.024179  | -1.781591 | -2.120072 |
| Al | 1.119987  | 0.905757  | -2.997708 |
| Al | 1.179755  | 3.261471  | -1.405046 |
| Al | 1.354052  | 1.577543  | 3.912035  |
| Al | 1.570429  | -0.453706 | 2.077433  |
| Al | 1.689150  | 2.279455  | 1.218836  |
| Al | 2.834488  | -3.630207 | -1.115849 |
| Al | 2.992954  | -1.035580 | -0.265561 |
| Al | 3.037145  | 1.408189  | -1.064195 |
| Al | 3.224590  | -2.680373 | 1.904077  |
| Mg | -5.381918 | 0.592118  | 0.352988  |
| Mg | -3.305286 | -1.177519 | -4.945682 |
| Mg | -3.218420 | -4.635512 | -1.283793 |
| Mg | -2.524873 | -3.049260 | 3.988596  |
| Mg | -2.365574 | 5.538088  | 1.454335  |
| Mg | -1.931412 | 1.954863  | 5.021316  |
| Mg | -1.199111 | 5.390673  | -1.770535 |
| Mg | -1.171299 | 1.609429  | -5.245960 |
| Mg | 1.692968  | -4.100334 | -4.144808 |
| Mg | 1.712610  | -5.552394 | 1.304687  |
| Mg | 2.829701  | 4.358312  | 3.337922  |
| Mg | 2.853228  | -1.224302 | 4.825253  |
| Mg | 3.260181  | 3.062294  | -3.776889 |
| Mg | 3.724406  | -0.939232 | -3.380298 |
| Mg | 3.904015  | 4.274158  | -0.057540 |
| Mg | 4.412169  | 0.784843  | 1.956173  |
| Mg | 5.676782  | -2.612185 | -0.119142 |

#### Al34Mg16

|    |           |           |           |
|----|-----------|-----------|-----------|
| Al | -4.004245 | -0.201910 | -1.037569 |
| Al | -3.928327 | -1.050039 | 2.027156  |
| Al | -3.324660 | 2.454186  | -1.200693 |
| Al | -3.234265 | 1.216030  | 3.438552  |
| Al | -2.972099 | 3.502005  | 1.624199  |
| Al | -2.575689 | -2.032080 | -2.413371 |
| Al | -2.479054 | 0.931738  | 0.896033  |
| Al | -2.089552 | -3.173060 | 2.364957  |
| Al | -1.985033 | -1.547224 | 0.230704  |
| Al | -1.451673 | -4.179040 | -0.169995 |
| Al | -1.205503 | 0.470492  | -1.699787 |
| Al | -1.131242 | -0.593082 | 2.769711  |
| Al | -1.102462 | 3.233182  | -2.657826 |
| Al | -0.889825 | 2.780166  | -0.022768 |
| Al | -0.814047 | 2.236414  | 2.694948  |
| Al | -0.435392 | -1.282945 | -3.959544 |
| Al | -0.368583 | 4.728567  | 1.719984  |
| Al | -0.072058 | -2.209565 | -1.425957 |
| Al | 0.302640  | 1.386552  | -4.025490 |
| Al | 0.385400  | -2.524391 | 1.297890  |
| Al | 0.469052  | 0.173603  | 0.513051  |
| Al | 0.784070  | 4.742589  | -0.746761 |
| Al | 1.224257  | 2.222268  | -1.525201 |
| Al | 1.258170  | -4.448875 | -0.668850 |

|    |           |           |           |
|----|-----------|-----------|-----------|
| Al | 1.280372  | 0.722749  | 3.200200  |
| Al | 1.488286  | -0.281838 | -2.314155 |
| Al | 1.579588  | 2.680457  | 1.190661  |
| Al | 1.980198  | -2.883669 | -3.064496 |
| Al | 2.487953  | -1.999224 | -0.488299 |
| Al | 2.694256  | -1.052999 | 1.970129  |
| Al | 2.824194  | -3.741348 | 1.503349  |
| Al | 3.163941  | 0.677896  | -0.273084 |
| Al | 3.320823  | 1.516245  | -3.042848 |
| Al | 4.076991  | -1.044949 | -2.438423 |
| Mg | -5.559390 | 1.637382  | 1.127839  |
| Mg | -4.547922 | -3.340875 | -0.125271 |
| Mg | -3.112709 | -1.660039 | 5.010576  |
| Mg | -3.033250 | 0.844810  | -4.120568 |
| Mg | -2.348676 | 5.552825  | -0.771568 |
| Mg | -0.826057 | 0.974804  | 5.585268  |
| Mg | -0.760708 | -4.579881 | -3.347321 |
| Mg | 0.203438  | -5.525323 | 2.230712  |
| Mg | 0.975942  | -2.416283 | 4.333355  |
| Mg | 1.517424  | 3.804124  | 4.161000  |
| Mg | 1.738483  | 4.277992  | -3.844712 |
| Mg | 2.495244  | -0.639895 | -5.318048 |
| Mg | 3.895390  | 3.776585  | -0.760233 |
| Mg | 4.279958  | 1.667706  | 2.531784  |
| Mg | 4.378975  | -4.287275 | -1.448606 |
| Mg | 5.447378  | -1.515556 | 0.489385  |

#### Al35Mg15

|    |           |           |           |
|----|-----------|-----------|-----------|
| Al | -4.161272 | -2.552044 | -0.508874 |
| Al | -4.043223 | -2.513126 | 2.259290  |
| Al | -3.168777 | -0.229663 | -1.635560 |
| Al | -2.789872 | -0.358780 | 3.577245  |
| Al | -2.638465 | 2.194454  | -0.915288 |
| Al | -2.356519 | -1.019432 | 0.896167  |
| Al | -2.198252 | -3.999288 | 0.788014  |
| Al | -2.118060 | 1.638840  | 1.747195  |
| Al | -1.594061 | -2.382917 | -1.364561 |
| Al | -1.476072 | -2.795533 | 3.149503  |
| Al | -0.875440 | 3.928460  | 2.936945  |
| Al | -0.732118 | 3.640816  | 0.203657  |
| Al | -0.705876 | -0.380708 | -3.020418 |
| Al | -0.636227 | 1.571161  | 4.298388  |
| Al | -0.472884 | 0.477576  | -0.390916 |
| Al | -0.281257 | -0.425154 | 2.568534  |
| Al | -0.208633 | 2.474428  | -2.310384 |
| Al | -0.156762 | -3.188161 | -3.491399 |
| Al | 0.012621  | -2.403245 | 0.873267  |
| Al | 0.230070  | -4.412257 | -0.929123 |
| Al | 0.593148  | 1.920243  | 1.801060  |
| Al | 0.865618  | 1.193408  | -4.511549 |
| Al | 1.086033  | -1.848033 | -1.475757 |
| Al | 1.550740  | 4.487493  | 1.618721  |
| Al | 1.623896  | 3.134523  | 3.981163  |
| Al | 1.787549  | -2.181348 | 2.901278  |
| Al | 1.799237  | 2.698264  | -0.431812 |
| Al | 1.840243  | -1.332154 | -3.992117 |
| Al | 1.868525  | 0.623899  | -2.083809 |
| Al | 1.984173  | -0.232354 | 0.713809  |
| Al | 2.076306  | 0.432418  | 3.648342  |
| Al | 2.582961  | -3.130813 | 0.442309  |
| Al | 3.289698  | 2.139569  | 1.894044  |
| Al | 3.714092  | -1.330393 | -1.274742 |
| Al | 4.082132  | 1.244736  | -0.580323 |
| Mg | -5.039062 | 0.466124  | 0.977354  |
| Mg | -3.614090 | 4.402807  | 1.222109  |
| Mg | -3.578986 | 2.678879  | 4.351776  |
| Mg | -3.269022 | -2.265689 | -4.016469 |
| Mg | -2.649601 | -5.195162 | -2.149665 |
| Mg | -2.645787 | 1.771772  | -4.174071 |
| Mg | -0.545937 | -1.242645 | -6.070319 |
| Mg | 0.011727  | -1.299845 | 5.566624  |
| Mg | 0.589484  | -5.160420 | 2.218890  |
| Mg | 0.981842  | 5.593627  | -1.452765 |

|    |          |           |           |
|----|----------|-----------|-----------|
| Mg | 2.893715 | 3.367559  | -3.297329 |
| Mg | 2.911688 | -4.132112 | -2.703988 |
| Mg | 4.378246 | 4.446901  | 0.023042  |
| Mg | 4.499228 | 0.392021  | -3.816081 |
| Mg | 4.703285 | -0.908703 | 1.938590  |

#### Al36Mg14

|    |           |           |           |
|----|-----------|-----------|-----------|
| Al | -3.844200 | 1.183852  | 0.549045  |
| Al | -3.628721 | 0.045929  | -1.944317 |
| Al | -3.112312 | -0.115000 | 2.836561  |
| Al | -2.638250 | -2.519696 | -2.081728 |
| Al | -2.189343 | -2.703814 | 2.641185  |
| Al | -1.922033 | 3.968948  | 0.476549  |
| Al | -1.899508 | -3.874148 | 0.147493  |
| Al | -1.886556 | -0.959589 | 0.247222  |
| Al | -1.858989 | 1.863310  | -3.701710 |
| Al | -1.683870 | 1.683177  | -0.983251 |
| Al | -1.638605 | -1.112048 | 4.950907  |
| Al | -1.332404 | 1.576629  | 1.596759  |
| Al | -1.017837 | 1.507549  | 4.260064  |
| Al | -1.003380 | -0.420471 | -2.459052 |
| Al | -0.806793 | 4.050515  | -2.051193 |
| Al | -0.397946 | -0.639218 | 2.612976  |
| Al | -0.117499 | 3.727458  | 2.612007  |
| Al | 0.002494  | -2.509853 | -1.227180 |
| Al | 0.092752  | -2.373843 | -3.962859 |
| Al | 0.291230  | -2.846645 | 1.393962  |
| Al | 0.305909  | -2.843431 | 4.125955  |
| Al | 0.393077  | 0.285293  | -4.707852 |
| Al | 0.582562  | 1.750077  | -2.430136 |
| Al | 0.670882  | 2.802724  | 0.117102  |
| Al | 0.745016  | -0.000701 | 0.080562  |
| Al | 1.032401  | -0.206180 | 4.878810  |
| Al | 1.119972  | -4.744601 | -0.277746 |
| Al | 1.391877  | 1.402796  | 2.506320  |
| Al | 1.804989  | -0.722776 | -2.384329 |
| Al | 1.996631  | 3.967783  | -2.027696 |
| Al | 2.191884  | -3.448690 | -2.487123 |
| Al | 2.217591  | -1.387049 | 2.698883  |
| Al | 2.549357  | -2.215689 | -0.030088 |
| Al | 2.815455  | 1.410118  | -3.836735 |
| Al | 2.940912  | 1.598641  | -1.142867 |
| Al | 3.421958  | 0.222232  | 0.998601  |
| Mg | -4.725224 | -2.042808 | 0.533657  |
| Mg | -4.113887 | 3.377156  | -1.900191 |
| Mg | -3.531496 | 3.168425  | 3.160495  |
| Mg | -2.703716 | -0.997968 | -4.998937 |
| Mg | -0.856488 | -5.168281 | -2.732943 |
| Mg | -0.628441 | -5.585756 | 2.545366  |
| Mg | 0.616326  | 5.923594  | 0.218904  |
| Mg | 0.622145  | 3.566384  | -4.984933 |
| Mg | 1.573030  | 2.995030  | 5.252426  |
| Mg | 2.833899  | -4.445396 | 2.423886  |
| Mg | 3.002985  | -1.611135 | -5.128932 |
| Mg | 3.414171  | 3.574323  | 1.335068  |
| Mg | 4.066613  | 0.730800  | 4.113865  |
| Mg | 4.841381  | -0.887959 | -1.832834 |

#### Al37Mg13

|    |           |           |           |
|----|-----------|-----------|-----------|
| Al | -4.326860 | -0.617838 | -1.534563 |
| Al | -4.279810 | 1.367930  | 0.604564  |
| Al | -3.196854 | -2.438092 | -3.335743 |
| Al | -3.184105 | -2.991510 | -0.678307 |
| Al | -3.134124 | 0.247503  | -3.845719 |
| Al | -2.879776 | 3.793285  | -0.204228 |
| Al | -2.750475 | 0.143213  | 3.021082  |
| Al | -2.446898 | 1.384517  | -1.445898 |
| Al | -2.417792 | -0.632666 | 0.434069  |
| Al | -2.132024 | -2.461288 | 2.410413  |
| Al | -1.991229 | 3.719297  | -2.800150 |
| Al | -1.622956 | 1.766513  | 1.150246  |
| Al | -1.349017 | -0.986814 | -2.099439 |



|    |           |           |           |
|----|-----------|-----------|-----------|
| Al | -1.014654 | -3.791267 | -2.255139 |
| Al | -0.774762 | 4.306344  | 1.528095  |
| Al | -0.732574 | 1.444548  | -3.544819 |
| Al | -0.702587 | 1.849714  | 3.694679  |
| Al | -0.669262 | 5.295237  | -0.999423 |
| Al | -0.621516 | -2.524189 | 0.111408  |
| Al | -0.126299 | 2.694175  | -1.001221 |
| Al | -0.003827 | -0.492721 | 2.140905  |
| Al | 0.422755  | -3.347139 | 2.506755  |
| Al | 0.502980  | 0.126662  | -0.441094 |
| Al | 0.953441  | 2.181215  | 1.515723  |
| Al | 1.128567  | -4.478183 | -0.426272 |
| Al | 1.190342  | -2.127652 | -2.069575 |
| Al | 1.610228  | 0.511263  | -2.903753 |
| Al | 1.683942  | 4.457443  | 0.236443  |
| Al | 1.875482  | 0.997775  | 3.775429  |
| Al | 1.928027  | -2.098118 | 0.624870  |
| Al | 2.461933  | -1.627440 | 3.226275  |
| Al | 2.620361  | 2.085837  | -0.823070 |
| Al | 2.840516  | 0.314892  | 1.310796  |
| Al | 3.396487  | -0.595153 | -1.202734 |
| Al | 3.501955  | 2.878002  | 1.767892  |
| Al | 3.542802  | -3.325084 | -1.138091 |
| Al | 4.548869  | -1.768574 | 1.052480  |
| Mg | -5.175222 | -1.617441 | 1.531691  |
| Mg | -5.108923 | 2.543031  | -2.400421 |
| Mg | -3.525872 | 3.386107  | 3.039076  |
| Mg | -1.674009 | -5.362941 | 0.878502  |
| Mg | -0.380647 | -1.237923 | 5.058325  |
| Mg | -0.323825 | -1.546107 | -4.916911 |
| Mg | 1.449723  | 3.935830  | -3.288331 |
| Mg | 1.483239  | 4.300978  | 3.789094  |
| Mg | 1.790703  | -4.871566 | -3.483239 |
| Mg | 3.348856  | -4.604095 | 1.944912  |
| Mg | 3.589346  | -1.794430 | -4.091423 |
| Mg | 5.021205  | 0.397505  | 3.524248  |
| Mg | 5.654138  | 1.209415  | 0.051594  |

#### Al38Mg12

|    |           |           |           |
|----|-----------|-----------|-----------|
| Al | -4.447756 | 0.902616  | -0.419512 |
| Al | -4.021003 | -2.098511 | -0.448757 |
| Al | -3.212493 | 2.010507  | 2.137964  |
| Al | -2.952632 | 2.084349  | -2.776787 |
| Al | -2.529887 | -0.370200 | 1.066880  |
| Al | -2.518903 | -2.866805 | 2.090479  |
| Al | -2.417716 | -0.327337 | -1.697508 |
| Al | -2.384030 | -0.374721 | 3.659229  |
| Al | -2.262179 | -2.771474 | -2.824029 |
| Al | -1.931634 | 1.971830  | -0.236636 |
| Al | -1.601841 | -0.186442 | -4.262955 |
| Al | -1.306052 | -2.427319 | -0.279452 |
| Al | -1.261795 | 4.018387  | 1.214074  |
| Al | -0.782544 | 3.931088  | -1.693287 |
| Al | -0.468889 | 1.368116  | 2.242875  |
| Al | -0.338182 | 1.362092  | -2.388682 |
| Al | -0.098759 | -0.013405 | -0.069341 |
| Al | -0.088262 | -4.233268 | 1.133777  |
| Al | -0.062824 | -1.487161 | 2.215075  |
| Al | 0.003078  | -0.044742 | 4.643495  |
| Al | 0.048455  | -1.356704 | -2.415103 |
| Al | 0.339773  | -3.960487 | -1.769963 |
| Al | 0.953664  | 2.492507  | 0.000008  |
| Al | 0.979712  | 3.778401  | 2.515596  |
| Al | 1.412751  | 0.240780  | -4.108506 |
| Al | 1.610718  | -2.127388 | -0.044951 |
| Al | 1.727129  | 2.874641  | -2.822629 |
| Al | 1.880460  | 1.651851  | 3.830787  |
| Al | 2.001025  | -3.402774 | 2.445685  |
| Al | 2.104840  | 0.284991  | 1.477871  |
| Al | 2.238873  | 0.332170  | -1.413947 |
| Al | 2.276770  | -1.134902 | 3.803633  |
| Al | 2.452401  | -2.224943 | -2.872146 |
| Al | 3.268928  | 2.749320  | 1.641704  |

|    |           |           |           |
|----|-----------|-----------|-----------|
| Al | 3.580858  | 2.783313  | -0.997425 |
| Al | 3.910196  | -1.759769 | 1.597760  |
| Al | 4.212178  | -1.654967 | -1.040662 |
| Al | 4.523292  | 0.640844  | 0.261594  |
| Mg | -5.312875 | -0.777770 | 2.286900  |
| Mg | -4.874180 | -0.659508 | -3.422229 |
| Mg | -4.046709 | 4.178826  | -0.471692 |
| Mg | -2.722756 | -5.131487 | -0.562174 |
| Mg | -1.352206 | 2.954312  | 4.686962  |
| Mg | -0.674449 | 2.888336  | -5.026306 |
| Mg | -0.462404 | -3.302959 | 4.626078  |
| Mg | 0.143898  | -2.865757 | -5.082147 |
| Mg | 1.764899  | 5.418227  | -0.227840 |
| Mg | 3.205030  | -4.705891 | -0.326458 |
| Mg | 4.581503  | 0.684101  | -3.326520 |
| Mg | 4.912528  | 0.665085  | 3.449217  |

Al39Mg11

|    |           |           |           |
|----|-----------|-----------|-----------|
| Al | -1.867506 | -0.264051 | -4.167323 |
| Al | -0.766780 | 2.156625  | -4.050872 |
| Al | -0.154495 | -2.292831 | -4.043307 |
| Al | 1.532394  | 2.799882  | -3.001278 |
| Al | 2.226197  | -2.318190 | -2.981592 |
| Al | 3.289643  | 0.437505  | -2.816922 |
| Al | -3.101542 | 1.877413  | -2.806069 |
| Al | -2.471618 | -2.650789 | -2.778070 |
| Al | 0.504924  | 0.071675  | -2.635072 |
| Al | -2.132780 | -0.284846 | -1.456555 |
| Al | -0.763767 | 2.279277  | -1.236597 |
| Al | -0.118147 | -2.354818 | -1.230795 |
| Al | 2.460026  | -1.052606 | -0.733877 |
| Al | 2.101149  | 1.673359  | -0.729735 |
| Al | -4.464214 | 0.814261  | -0.575870 |
| Al | -4.073696 | -1.985489 | -0.562367 |
| Al | -3.321037 | 3.217316  | -0.517997 |
| Al | -2.273319 | -3.955570 | -0.455945 |
| Al | 1.145386  | 4.177672  | -0.426363 |
| Al | 2.232914  | -3.754880 | -0.314481 |
| Al | 4.515696  | 0.601210  | -0.021363 |
| Al | 0.078813  | 0.074166  | 0.034639  |
| Al | -1.397827 | 4.016916  | 1.051575  |
| Al | -2.165474 | 1.180694  | 1.058331  |
| Al | -1.778927 | -1.665098 | 1.066131  |
| Al | -0.217030 | -4.321527 | 1.140561  |
| Al | 1.012639  | -2.021531 | 1.339100  |
| Al | 0.535448  | 2.323601  | 1.435742  |
| Al | 3.215757  | 2.882397  | 1.459582  |
| Al | 3.783552  | -2.059246 | 1.496511  |
| Al | 2.436527  | 0.309338  | 1.668757  |
| Al | -4.296560 | -0.572782 | 1.685435  |
| Al | 2.077382  | -3.953176 | 2.688933  |
| Al | -0.075961 | 0.000532  | 2.773417  |
| Al | -1.250269 | 2.323080  | 3.462378  |
| Al | -0.507305 | -2.616910 | 3.475251  |
| Al | -2.514108 | -0.349290 | 3.574450  |
| Al | 2.118222  | -1.367712 | 3.799638  |
| Al | 1.731151  | 1.757461  | 3.829784  |
| Mg | 1.426682  | 0.186557  | -5.529629 |
| Mg | -4.949244 | -0.691588 | -3.370830 |
| Mg | -1.330137 | 4.998086  | -2.462189 |
| Mg | 0.105535  | -5.156475 | -2.392136 |
| Mg | 4.385093  | 3.522575  | -1.572968 |
| Mg | 5.146149  | -2.294888 | -1.501712 |
| Mg | -4.405238 | 2.608343  | 2.537044  |
| Mg | -3.495619 | -3.660896 | 2.588597  |
| Mg | 1.080559  | 4.894681  | 2.997665  |
| Mg | 4.904728  | 0.554519  | 3.379941  |
| Mg | -0.153966 | -0.093953 | 5.828451  |

Al40Mg10

|    |          |           |           |
|----|----------|-----------|-----------|
| Al | 1.526012 | 1.311362  | -4.165967 |
| Al | 2.637356 | -1.262676 | -3.564555 |

|    |           |           |           |
|----|-----------|-----------|-----------|
| Al | -2.087610 | -2.345098 | -3.531621 |
| Al | 0.113599  | -0.764381 | -3.121750 |
| Al | 0.739748  | -3.392845 | -2.906619 |
| Al | 1.429942  | 3.570827  | -2.457764 |
| Al | -0.540207 | 1.831715  | -2.446391 |
| Al | -3.262234 | 2.352247  | -2.223011 |
| Al | -2.341698 | -0.148974 | -1.959836 |
| Al | 4.420303  | -0.919410 | -1.686481 |
| Al | 2.240408  | 0.878977  | -1.604994 |
| Al | -1.191972 | 4.143887  | -1.391966 |
| Al | -0.955104 | -2.366530 | -1.097279 |
| Al | -3.666931 | -2.357969 | -1.060792 |
| Al | 1.881518  | -1.837425 | -0.865232 |
| Al | 3.380974  | 3.270957  | -0.738736 |
| Al | -4.495726 | 0.392243  | -0.553729 |
| Al | -0.072752 | 0.058709  | -0.440669 |
| Al | 0.520697  | -4.376223 | -0.236924 |
| Al | 4.538375  | 1.058897  | 0.098598  |
| Al | 0.730274  | 2.599000  | 0.138725  |
| Al | -2.052761 | 1.876536  | 0.179785  |
| Al | -2.061428 | -3.764037 | 0.847137  |
| Al | 4.223145  | -1.589154 | 0.865888  |
| Al | -2.349300 | -0.844137 | 0.918261  |
| Al | 2.161526  | 0.174784  | 1.136543  |
| Al | 2.570933  | -3.596432 | 1.188480  |
| Al | -1.251536 | 4.337522  | 1.219470  |
| Al | 0.216987  | -2.000253 | 1.461335  |
| Al | 2.971058  | 2.674613  | 1.837906  |
| Al | -4.113576 | 1.096544  | 1.933050  |
| Al | -0.399566 | 0.767368  | 2.170454  |
| Al | 0.541399  | 3.253244  | 2.903025  |
| Al | -2.243287 | 2.671539  | 3.006871  |
| Al | 2.477054  | -1.700394 | 3.093794  |
| Al | -2.036222 | -2.490396 | 3.135825  |
| Al | 1.881878  | 0.956483  | 3.767786  |
| Al | -2.535658 | 0.011129  | 3.774007  |
| Al | 0.043203  | -1.107858 | 4.152097  |
| Al | -0.537387 | 1.548723  | 4.842143  |
| Mg | -1.923343 | 0.728371  | -5.027540 |
| Mg | -4.942437 | -0.644984 | -3.551608 |
| Mg | 4.609109  | 1.832628  | -3.355358 |
| Mg | -2.031821 | -5.173681 | -2.072006 |
| Mg | 3.729526  | -4.104914 | -1.805641 |
| Mg | -4.352575 | 3.926459  | 0.392591  |
| Mg | 1.548434  | 5.575878  | 0.427628  |
| Mg | -5.007440 | -2.039246 | 1.901797  |
| Mg | 4.942225  | 0.452835  | 3.205673  |
| Mg | 0.376891  | -4.526461 | 3.267596  |

#### Al41Mg9

|    |           |           |           |
|----|-----------|-----------|-----------|
| Al | 1.023530  | -0.120255 | -5.231597 |
| Al | -0.585783 | -2.260304 | -4.822911 |
| Al | -1.657115 | 0.333415  | -4.482390 |
| Al | 2.055744  | -2.312456 | -3.813797 |
| Al | 0.435545  | 1.924486  | -3.471523 |
| Al | -2.236033 | 2.694132  | -3.360981 |
| Al | -2.576074 | -1.751086 | -3.035888 |
| Al | 2.633538  | 0.319364  | -3.010140 |
| Al | 0.140961  | -0.683581 | -2.692630 |
| Al | 0.060257  | -3.604838 | -2.545904 |
| Al | 4.196797  | -1.835530 | -2.269549 |
| Al | -1.949261 | 0.652597  | -1.499395 |
| Al | -0.491792 | 3.156080  | -1.333118 |
| Al | 2.217082  | 2.534977  | -1.271617 |
| Al | -3.285775 | 3.189723  | -0.888617 |
| Al | 1.813088  | -1.945947 | -0.869737 |
| Al | -1.146333 | -2.004252 | -0.804889 |
| Al | 3.689272  | 0.245570  | -0.577120 |
| Al | -3.814837 | -1.511282 | -0.559674 |
| Al | 0.694778  | 0.575443  | -0.236095 |
| Al | 0.082797  | -4.243314 | 0.181885  |
| Al | 4.364339  | -2.333355 | 0.355573  |
| Al | -4.143232 | 1.045994  | 0.508841  |

|    |           |           |           |
|----|-----------|-----------|-----------|
| Al | -1.562652 | 4.774355  | 0.703789  |
| Al | -1.492104 | 2.044549  | 0.865550  |
| Al | 0.807074  | 3.441904  | 1.098797  |
| Al | -2.048587 | -0.467074 | 1.190198  |
| Al | 0.232952  | -1.770089 | 1.434667  |
| Al | -2.253406 | -3.179010 | 1.451243  |
| Al | 2.879535  | 1.893718  | 1.465167  |
| Al | 2.283411  | -3.539441 | 1.627904  |
| Al | 2.635635  | -0.772069 | 1.677271  |
| Al | -3.577922 | 3.345070  | 1.933183  |
| Al | 0.322153  | 0.788757  | 2.540303  |
| Al | -0.108461 | -3.894719 | 3.013829  |
| Al | -1.044476 | 3.389796  | 3.188434  |
| Al | -2.560546 | 1.128954  | 3.286385  |
| Al | -1.435693 | -1.446807 | 3.642022  |
| Al | 1.586262  | 2.959486  | 3.669634  |
| Al | 1.267687  | -1.658362 | 3.945768  |
| Al | 2.796137  | 0.596306  | 3.966856  |
| Mg | -4.758982 | 0.735836  | -2.776472 |
| Mg | -2.040736 | 5.731717  | -2.345616 |
| Mg | 2.929441  | -4.765712 | -1.449253 |
| Mg | -2.832799 | -4.581462 | -1.420789 |
| Mg | 1.328872  | 5.674857  | -1.011234 |
| Mg | 5.589761  | 0.320034  | 2.002606  |
| Mg | -4.638797 | -1.338914 | 2.696479  |
| Mg | 4.352970  | -2.414531 | 3.763622  |
| Mg | -0.178225 | 0.937269  | 5.570927  |

#### Al42Mg8

|    |           |           |           |
|----|-----------|-----------|-----------|
| Al | -2.869661 | 0.179462  | -4.205638 |
| Al | -0.296574 | 0.786164  | -4.143771 |
| Al | -2.161428 | 2.822495  | -3.734082 |
| Al | 2.248007  | 0.572847  | -3.316384 |
| Al | -0.095921 | -3.980425 | -2.789983 |
| Al | -1.053343 | -1.375614 | -2.719188 |
| Al | 0.568079  | 2.759505  | -2.642244 |
| Al | 1.883999  | -2.036140 | -2.438136 |
| Al | -4.346244 | 1.585958  | -2.407856 |
| Al | -3.881744 | -1.110184 | -2.102790 |
| Al | -1.780929 | 1.236858  | -1.642041 |
| Al | -1.451523 | 4.053018  | -1.394386 |
| Al | -2.469658 | -3.434007 | -1.388751 |
| Al | 3.845165  | -0.187178 | -1.257521 |
| Al | 2.878718  | 2.371515  | -1.200490 |
| Al | 0.658526  | 0.122021  | -1.150067 |
| Al | 1.949385  | -4.397818 | -0.857821 |
| Al | -0.036248 | -2.659074 | -0.479488 |
| Al | -3.631159 | 2.986770  | -0.215976 |
| Al | -2.085354 | -1.014077 | -0.143137 |
| Al | 0.440048  | 2.671491  | 0.085622  |
| Al | -4.276924 | 0.482438  | 0.243067  |
| Al | 2.429711  | -1.988630 | 0.248876  |
| Al | 4.843599  | 1.624327  | 0.665956  |
| Al | 2.327457  | 0.616778  | 0.878216  |
| Al | -1.605794 | 1.362932  | 1.126519  |
| Al | -1.797373 | 4.121530  | 1.312385  |
| Al | 4.610753  | -0.930226 | 1.433931  |
| Al | 2.871517  | 3.253323  | 1.533171  |
| Al | -1.801945 | -3.120232 | 1.590503  |
| Al | 0.052091  | -0.768370 | 1.605765  |
| Al | 0.873290  | -3.612722 | 1.892210  |
| Al | 0.640582  | 4.524860  | 2.234555  |
| Al | -2.991638 | -0.788728 | 2.412846  |
| Al | -3.592148 | 2.087104  | 2.595137  |
| Al | 0.710790  | 1.789824  | 2.646013  |
| Al | 2.359603  | -1.525903 | 2.955800  |
| Al | 3.477720  | 1.038581  | 3.221032  |
| Al | -1.282291 | 3.239700  | 3.761272  |
| Al | -0.466428 | -2.044086 | 3.831381  |
| Al | -1.392814 | 0.585288  | 3.946614  |
| Al | 1.179143  | 0.112215  | 4.655122  |
| Mg | 0.667062  | -1.970888 | -5.325747 |
| Mg | -2.886381 | -3.087702 | -4.546282 |

|    |           |           |           |
|----|-----------|-----------|-----------|
| Mg | 4.854817  | -3.136088 | -1.430165 |
| Mg | 1.567482  | 5.383165  | -0.801591 |
| Mg | -0.784355 | -5.760109 | 0.013275  |
| Mg | -4.866334 | -2.661161 | 0.589137  |
| Mg | 4.008024  | -4.138522 | 1.894483  |
| Mg | 1.958646  | 3.357714  | 4.960647  |

#### Al43Mg7

|    |           |           |           |
|----|-----------|-----------|-----------|
| Al | -4.210566 | 1.088002  | -1.593393 |
| Al | -4.144673 | 1.900392  | 1.123604  |
| Al | -3.801730 | -1.728956 | -2.010129 |
| Al | -3.418999 | -3.215563 | 0.378718  |
| Al | -3.184970 | -0.499609 | 0.235900  |
| Al | -2.608720 | 2.679016  | -2.918167 |
| Al | -2.070763 | 3.411819  | 2.396745  |
| Al | -2.008811 | 0.764546  | 2.378450  |
| Al | -1.853406 | -2.363389 | -3.648950 |
| Al | -1.849443 | 2.187490  | -0.274496 |
| Al | -1.636439 | -1.934259 | 2.002483  |
| Al | -1.588497 | 0.092685  | -2.218006 |
| Al | -1.241244 | -0.812355 | 4.466347  |
| Al | -1.192425 | -2.468592 | -0.956832 |
| Al | -0.972462 | -4.367245 | 1.239847  |
| Al | -0.755012 | 4.723181  | 0.567159  |
| Al | -0.560788 | 4.057553  | -2.000602 |
| Al | -0.501036 | 1.947061  | 4.206070  |
| Al | -0.489549 | -0.154659 | 0.293927  |
| Al | -0.258618 | 1.912955  | -3.924213 |
| Al | 0.161757  | -0.744671 | -4.343846 |
| Al | 0.219129  | -3.045608 | 3.499254  |
| Al | 0.381864  | 2.153370  | 1.421114  |
| Al | 0.553802  | -3.353673 | -3.194171 |
| Al | 0.562362  | -4.617176 | -0.873921 |
| Al | 0.696745  | 1.731471  | -1.399248 |
| Al | 0.758632  | 4.284522  | 2.818586  |
| Al | 0.784581  | -0.276648 | 2.765033  |
| Al | 1.062124  | -2.382968 | 0.829412  |
| Al | 1.065037  | -1.045409 | -1.774381 |
| Al | 1.675323  | 4.031562  | -0.235268 |
| Al | 2.072653  | 2.074790  | 3.797779  |
| Al | 2.246790  | 0.230895  | 0.438422  |
| Al | 2.284671  | 0.822879  | -3.470042 |
| Al | 2.696296  | -2.261295 | 3.168522  |
| Al | 2.705601  | -1.859015 | -3.855249 |
| Al | 2.756865  | -3.155908 | -1.350871 |
| Al | 3.213517  | 2.633997  | 1.466041  |
| Al | 3.438494  | 2.098210  | -1.258883 |
| Al | 3.665663  | 0.169352  | 2.809114  |
| Al | 3.871239  | -0.622717 | -1.687714 |
| Al | 3.899325  | -1.913156 | 0.802539  |
| Al | 4.983022  | 0.658181  | 0.492080  |
| Mg | -4.485317 | -1.071465 | 3.056060  |
| Mg | -3.759258 | 4.606353  | -0.593236 |
| Mg | -3.188339 | 0.242579  | -4.868218 |
| Mg | -2.403045 | -5.103712 | -2.041647 |
| Mg | 1.730494  | -0.502877 | 5.703776  |
| Mg | 2.213282  | 4.018750  | -3.483127 |
| Mg | 2.484840  | -5.020686 | 1.617627  |

#### Al44Mg6

|    |           |           |           |
|----|-----------|-----------|-----------|
| Al | -4.582243 | 0.891969  | 0.991893  |
| Al | -4.348334 | -1.893719 | 0.743077  |
| Al | -4.080311 | 2.178022  | -1.479549 |
| Al | -3.549422 | 2.082677  | 3.298922  |
| Al | -3.394980 | -0.675689 | 3.077762  |
| Al | -3.136723 | 3.380927  | 0.855715  |
| Al | -3.011122 | -0.268588 | -0.953930 |
| Al | -2.622515 | 4.531770  | -1.653248 |
| Al | -2.550090 | -4.069012 | 0.046903  |
| Al | -2.162946 | 2.567131  | -3.552906 |
| Al | -1.921464 | 0.958393  | 1.445862  |
| Al | -1.734245 | -1.832977 | 1.204879  |

|    |           |           |           |
|----|-----------|-----------|-----------|
| Al | -1.428987 | 2.181212  | -1.002042 |
| Al | -1.225433 | -2.435146 | -1.657840 |
| Al | -1.209801 | 0.766905  | 4.143769  |
| Al | -1.155768 | 0.081199  | -3.007620 |
| Al | -1.071581 | 3.227279  | 2.775157  |
| Al | -0.988376 | -2.042648 | 3.842243  |
| Al | -0.594463 | 4.488193  | 0.234087  |
| Al | -0.489084 | -4.155973 | 1.985498  |
| Al | -0.338385 | -0.172661 | -0.441645 |
| Al | -0.006447 | 4.000573  | -2.481288 |
| Al | 0.037766  | -4.766648 | -0.710042 |
| Al | 0.413770  | 1.871401  | -4.319639 |
| Al | 0.430075  | -0.358608 | 2.211207  |
| Al | 0.612419  | 2.129570  | 0.928199  |
| Al | 0.643863  | -3.691355 | -3.123982 |
| Al | 0.878743  | -2.425807 | 0.327693  |
| Al | 1.162852  | -0.593418 | 4.816014  |
| Al | 1.186184  | 1.600745  | -1.817991 |
| Al | 1.343675  | 1.860488  | 3.552109  |
| Al | 1.351439  | -1.255801 | -2.260172 |
| Al | 1.670378  | -2.680129 | 3.018397  |
| Al | 2.083255  | 3.833603  | -0.568597 |
| Al | 2.115302  | -4.697349 | 1.144476  |
| Al | 2.302996  | -0.011813 | 0.181235  |
| Al | 2.675590  | -3.574081 | -1.330846 |
| Al | 2.855457  | 0.497015  | -3.610587 |
| Al | 3.126474  | -0.227243 | 2.844798  |
| Al | 3.292667  | 2.226977  | 1.454291  |
| Al | 3.606203  | -2.317287 | 0.985148  |
| Al | 3.873837  | 1.718127  | -1.264184 |
| Al | 4.039991  | -1.090590 | -1.578221 |
| Al | 4.956422  | 0.120509  | 0.750423  |
| Mg | -4.266919 | -2.764463 | -2.380191 |
| Mg | -3.505170 | -3.905408 | 3.121456  |
| Mg | 0.516528  | -1.215829 | -5.314217 |
| Mg | 1.704365  | 4.863133  | 2.463157  |
| Mg | 2.986179  | 3.713158  | -3.653263 |
| Mg | 3.508383  | -2.648734 | -4.282371 |

#### Al45Mg5

|    |           |           |           |
|----|-----------|-----------|-----------|
| Al | -3.939127 | -1.860026 | 2.221229  |
| Al | -3.870288 | 0.939341  | 2.789683  |
| Al | -2.927105 | -1.322428 | -0.257862 |
| Al | -2.872743 | -0.918873 | 4.592133  |
| Al | -2.827108 | 1.417580  | 0.319930  |
| Al | -2.670110 | -3.881533 | 0.765208  |
| Al | -2.630256 | 4.031741  | -0.514360 |
| Al | -2.530750 | 3.373539  | 2.233216  |
| Al | -2.131727 | 0.493858  | -2.328787 |
| Al | -1.933213 | 3.127167  | -3.161801 |
| Al | -1.873301 | -1.327332 | -4.295877 |
| Al | -1.648590 | -0.463297 | 2.211127  |
| Al | -1.607107 | -3.046248 | 3.249616  |
| Al | -1.518910 | 1.508804  | 4.184314  |
| Al | -0.688356 | 1.088128  | -4.593210 |
| Al | -0.669968 | -2.011904 | -2.007657 |
| Al | -0.550288 | -0.017566 | -0.189710 |
| Al | -0.497319 | -4.530712 | -0.999260 |
| Al | -0.471187 | 2.507867  | -1.007413 |
| Al | -0.448041 | 5.079083  | -1.866971 |
| Al | -0.396559 | -2.492723 | 0.795725  |
| Al | -0.332562 | -5.032936 | 1.723530  |
| Al | -0.318185 | 1.917959  | 1.716719  |
| Al | -0.275007 | 4.558963  | 0.884070  |
| Al | -0.138936 | 3.868268  | 3.585256  |
| Al | -0.113510 | -0.950730 | 4.434560  |
| Al | 0.817989  | 0.470201  | -2.484782 |
| Al | 0.823586  | -1.496230 | -4.288878 |
| Al | 0.870536  | 3.099759  | -3.327274 |
| Al | 1.158218  | -0.487392 | 2.056770  |
| Al | 1.197476  | -3.068176 | 2.962356  |
| Al | 1.293301  | 1.505684  | 3.920149  |
| Al | 1.724331  | -3.371701 | -2.382528 |

|    |           |           |           |
|----|-----------|-----------|-----------|
| Al | 1.765696  | -1.379997 | -0.563169 |
| Al | 1.843698  | 1.338891  | 0.035861  |
| Al | 1.903874  | 3.964800  | -0.847054 |
| Al | 1.907327  | -3.994062 | 0.379565  |
| Al | 2.072015  | 3.348484  | 1.931249  |
| Al | 3.173820  | -0.941064 | -2.864428 |
| Al | 3.202273  | 1.852404  | -2.267583 |
| Al | 3.431761  | -1.914661 | 1.569153  |
| Al | 3.509466  | 0.908853  | 2.178921  |
| Al | 4.051565  | -2.786364 | -0.981823 |
| Al | 4.179776  | 2.711108  | 0.186604  |
| Al | 4.212858  | -0.040072 | -0.397338 |
| Mg | -4.792968 | 2.148465  | -2.016288 |
| Mg | -3.402569 | -3.570846 | -2.378863 |
| Mg | -0.616041 | -4.353090 | -4.278710 |
| Mg | 2.458898  | 1.082938  | -5.299515 |
| Mg | 3.093367  | -1.083922 | 4.674198  |

#### Al46Mg4

|    |           |           |           |
|----|-----------|-----------|-----------|
| Al | -4.234827 | -0.228927 | 0.996069  |
| Al | -3.893417 | -0.897468 | -1.774593 |
| Al | -3.625846 | 2.548965  | 1.356402  |
| Al | -3.458442 | -2.046081 | 2.951803  |
| Al | -3.197285 | -2.770349 | 0.247145  |
| Al | -3.077571 | 1.453060  | -3.191318 |
| Al | -2.897031 | 0.668466  | 3.350103  |
| Al | -2.835292 | 3.605581  | -1.232365 |
| Al | -2.795153 | -3.356596 | -2.471762 |
| Al | -2.382704 | 1.060005  | -0.574814 |
| Al | -2.230046 | 3.366126  | 3.631063  |
| Al | -2.019583 | -1.083089 | -3.914245 |
| Al | -1.598892 | -0.818597 | 1.412495  |
| Al | -1.587655 | 4.437800  | 1.151530  |
| Al | -1.267063 | -1.470114 | -1.271355 |
| Al | -1.192307 | -3.429237 | 2.145317  |
| Al | -1.165820 | 1.246334  | -5.212529 |
| Al | -1.045863 | 3.340754  | -3.393206 |
| Al | -0.983068 | 1.888736  | 1.733309  |
| Al | -0.978078 | -1.333227 | 4.060603  |
| Al | -0.846225 | -4.103328 | -0.637615 |
| Al | -0.460325 | 0.825187  | -2.632811 |
| Al | -0.362959 | 1.418142  | 4.416989  |
| Al | -0.217278 | 3.071015  | -0.809093 |
| Al | -0.107625 | -3.058349 | -3.168729 |
| Al | 0.278255  | 0.475167  | -0.134633 |
| Al | 0.457966  | 3.723014  | 3.066832  |
| Al | 0.709248  | -2.212460 | 0.594109  |
| Al | 0.718303  | -0.705341 | -4.578726 |
| Al | 0.899223  | -0.053171 | 2.443246  |
| Al | 1.332084  | 1.994686  | -4.236735 |
| Al | 1.373117  | -2.654530 | 3.207108  |
| Al | 1.465613  | -1.137095 | -1.978732 |
| Al | 1.545514  | -0.542627 | 5.016560  |
| Al | 1.823975  | 2.367724  | 1.108591  |
| Al | 1.921415  | -3.721699 | -1.282889 |
| Al | 2.155043  | 1.822400  | -1.625273 |
| Al | 2.411675  | 1.775503  | 3.726500  |
| Al | 2.752741  | -0.288006 | 0.374644  |
| Al | 3.275588  | 0.131567  | -3.442535 |
| Al | 3.318329  | -2.877032 | 1.079068  |
| Al | 3.500030  | -0.806241 | 3.017983  |
| Al | 4.062201  | -1.854729 | -1.455985 |
| Al | 4.333061  | 1.480310  | 1.659412  |
| Al | 4.666084  | 0.847247  | -1.111480 |
| Al | 5.325516  | -0.980862 | 0.877779  |
| Mg | -5.536734 | 1.819647  | -1.139514 |
| Mg | 1.291546  | -5.358802 | 1.433763  |
| Mg | 1.430302  | 5.415043  | 0.470926  |
| Mg | 2.950261  | -2.994520 | -4.258410 |

#### Al47Mg3

|    |          |           |           |
|----|----------|-----------|-----------|
| Al | 1.246980 | -1.236417 | -4.971968 |
|----|----------|-----------|-----------|

|    |           |           |           |
|----|-----------|-----------|-----------|
| Al | -0.354761 | 1.022216  | -4.558451 |
| Al | -1.417993 | -1.649787 | -4.249368 |
| Al | -1.999279 | 3.227839  | -3.960769 |
| Al | -3.008316 | 0.653256  | -3.778894 |
| Al | 2.319449  | 0.982521  | -3.608978 |
| Al | 0.669348  | -3.328998 | -3.187068 |
| Al | 0.655664  | 3.257316  | -3.092009 |
| Al | 2.917227  | -1.658528 | -2.784857 |
| Al | 0.369525  | -0.666690 | -2.486951 |
| Al | -1.979542 | -3.715293 | -2.387084 |
| Al | 3.274549  | 3.165603  | -2.114016 |
| Al | -1.236411 | 1.565862  | -1.970024 |
| Al | -3.679198 | 2.633412  | -1.817313 |
| Al | -2.433277 | -1.080317 | -1.760883 |
| Al | -1.431412 | 4.242076  | -1.424450 |
| Al | 3.962094  | 0.595431  | -1.316395 |
| Al | 0.006936  | -5.279627 | -1.258028 |
| Al | 1.400106  | 1.526525  | -1.057864 |
| Al | 2.269726  | -3.736167 | -0.878064 |
| Al | -0.244032 | -2.656655 | -0.634401 |
| Al | 1.271168  | 4.190587  | -0.469618 |
| Al | 2.079990  | -1.087872 | -0.247977 |
| Al | -0.569542 | -0.089264 | -0.024360 |
| Al | -3.150722 | 0.822410  | 0.178778  |
| Al | -1.994958 | -4.387528 | 0.434517  |
| Al | -0.668726 | 2.568002  | 0.608344  |
| Al | 3.339982  | 2.573700  | 0.631493  |
| Al | -3.150329 | 3.471966  | 0.810222  |
| Al | -2.448723 | -1.752254 | 1.059371  |
| Al | 0.644715  | -4.410090 | 1.349962  |
| Al | 3.946865  | -0.071968 | 1.484102  |
| Al | 1.385435  | 0.881984  | 1.646999  |
| Al | 2.892485  | -2.743302 | 1.767391  |
| Al | 0.345616  | -1.717442 | 1.922719  |
| Al | 1.255969  | 3.525306  | 2.322211  |
| Al | -1.260448 | 0.512187  | 2.451721  |
| Al | -3.704167 | 1.539760  | 2.771550  |
| Al | -1.457555 | -3.385271 | 3.033816  |
| Al | -1.456445 | 3.147281  | 3.169653  |
| Al | 3.244908  | 1.863976  | 3.348026  |
| Al | -3.048653 | -1.113725 | 3.636326  |
| Al | 2.279853  | -0.756305 | 3.687945  |
| Al | 1.198816  | -3.348761 | 3.892600  |
| Al | 0.615841  | 1.511207  | 4.235338  |
| Al | -0.404151 | -1.142465 | 4.525698  |
| Al | -2.047901 | 1.099720  | 4.970014  |
| Mg | -4.687501 | -3.013124 | -0.743633 |
| Mg | 5.137115  | -2.305497 | -0.521534 |
| Mg | -0.896321 | 5.753206  | 1.366161  |

#### Al48Mg2

|    |           |           |           |
|----|-----------|-----------|-----------|
| Al | -4.402318 | 0.514964  | 2.405649  |
| Al | -4.076896 | -2.612438 | -1.118501 |
| Al | -4.022223 | -2.169825 | 1.658844  |
| Al | -3.434290 | -0.158402 | -0.072667 |
| Al | -3.326460 | 3.163347  | 2.075843  |
| Al | -2.948498 | 1.748589  | 4.433468  |
| Al | -2.805939 | -1.858813 | -3.588739 |
| Al | -2.569182 | -0.966290 | 3.891147  |
| Al | -2.374865 | 2.454197  | -0.387543 |
| Al | -2.316055 | -4.329937 | -2.419360 |
| Al | -2.242265 | -4.093912 | 0.365255  |
| Al | -2.178167 | 0.571118  | -2.510498 |
| Al | -1.786182 | 0.974701  | 2.119930  |
| Al | -1.473122 | -2.033625 | -1.272675 |
| Al | -1.404930 | -1.766450 | 1.542600  |
| Al | -1.271064 | 4.390698  | -1.973343 |
| Al | -1.267568 | 4.669289  | 0.846507  |
| Al | -1.075896 | 2.480298  | -4.125909 |
| Al | -0.855043 | 3.295727  | 3.364005  |
| Al | -0.749127 | 0.257311  | -0.189890 |
| Al | -0.744309 | -0.275388 | -4.728898 |
| Al | -0.355384 | 0.716170  | 4.488566  |



|    |           |           |           |
|----|-----------|-----------|-----------|
| Al | -0.218813 | -2.889871 | -3.618845 |
| Al | 0.087794  | -2.028954 | 3.838885  |
| Al | 0.161022  | -4.280229 | -1.131899 |
| Al | 0.202076  | 2.164334  | -1.795573 |
| Al | 0.268417  | 2.478235  | 0.972923  |
| Al | 0.296973  | -3.933866 | 1.691197  |
| Al | 0.571681  | -0.521275 | -2.415122 |
| Al | 0.803741  | -0.054529 | 2.096071  |
| Al | 0.986836  | -1.897155 | 0.023091  |
| Al | 1.059962  | 4.121597  | -3.452110 |
| Al | 1.192737  | 4.513069  | -0.664757 |
| Al | 1.222851  | 4.714899  | 2.126510  |
| Al | 1.506473  | 1.432426  | -4.152268 |
| Al | 1.774319  | 2.230046  | 3.308769  |
| Al | 1.876565  | -1.314044 | -4.644287 |
| Al | 2.015026  | 0.678705  | -0.296791 |
| Al | 2.237325  | -0.331205 | 4.369250  |
| Al | 2.249134  | -2.729307 | -2.272152 |
| Al | 2.489214  | -2.250230 | 2.338971  |
| Al | 2.650099  | -4.033635 | 0.157646  |
| Al | 2.930862  | 2.675668  | -1.985304 |
| Al | 3.023862  | 2.964270  | 0.858909  |
| Al | 3.308837  | -0.073048 | -2.600309 |
| Al | 3.543564  | 0.405065  | 2.008982  |
| Al | 3.717133  | -1.484361 | -0.092473 |
| Al | 4.685950  | 1.091063  | -0.471410 |
| Mg | -2.328046 | -4.166658 | 3.582699  |
| Mg | 5.364192  | -2.452340 | -2.584392 |

#### Al49Mg1

|    |           |           |           |
|----|-----------|-----------|-----------|
| Al | -5.390501 | -0.935273 | 0.394333  |
| Al | -4.569324 | 1.157892  | -1.232101 |
| Al | -4.383098 | 1.343598  | 1.635684  |
| Al | -3.985116 | -1.463223 | -1.995967 |
| Al | -3.724020 | -1.180552 | 2.652042  |
| Al | -3.447444 | -2.934410 | 0.400912  |
| Al | -3.041773 | 0.760970  | -3.594369 |
| Al | -2.790254 | -0.247874 | 0.204535  |
| Al | -2.605006 | 1.218574  | 3.833759  |
| Al | -2.421721 | -1.878094 | -4.286932 |
| Al | -2.005076 | 2.062116  | -1.404744 |
| Al | -1.928560 | -3.420778 | -1.987312 |
| Al | -1.911521 | -1.331472 | 4.781645  |
| Al | -1.830327 | 2.311355  | 1.406938  |
| Al | -1.668262 | -3.141846 | 2.640860  |
| Al | -1.378513 | -4.814194 | 0.393750  |
| Al | -1.325401 | -0.702540 | -2.131496 |
| Al | -1.069548 | -0.428367 | 2.395534  |
| Al | -0.994781 | 2.704921  | -3.882580 |
| Al | -0.788903 | -2.190876 | 0.205455  |
| Al | -0.539535 | 3.146555  | 3.674493  |
| Al | -0.432212 | 0.071573  | -4.631726 |
| Al | -0.264358 | 0.538115  | 0.022520  |
| Al | 0.100830  | 0.613660  | 4.680778  |
| Al | 0.230694  | -2.492178 | -3.594249 |
| Al | 0.369881  | 3.176152  | -0.145244 |
| Al | 0.651677  | -2.053519 | 3.871297  |
| Al | 0.659572  | 1.257956  | -2.356462 |
| Al | 0.766868  | -3.992497 | -1.214195 |
| Al | 0.927395  | -3.830137 | 1.639485  |
| Al | 0.937094  | 1.500644  | 2.181535  |
| Al | 1.325099  | -1.277568 | -1.368459 |
| Al | 1.383224  | 3.820328  | -2.621524 |
| Al | 1.486086  | -1.123618 | 1.412013  |
| Al | 1.558566  | 2.065755  | -4.766254 |
| Al | 1.664415  | 4.082186  | 2.074216  |
| Al | 2.096226  | 2.576779  | 4.365126  |
| Al | 2.256925  | -0.471799 | -3.838467 |
| Al | 2.385132  | 1.038209  | -0.163612 |
| Al | 2.695550  | -0.052645 | 3.659039  |
| Al | 2.870100  | -2.986771 | -2.769807 |
| Al | 3.074225  | 3.630112  | -0.350704 |
| Al | 3.098294  | -2.898733 | 0.022235  |

|    |           |           |           |
|----|-----------|-----------|-----------|
| Al | 3.188309  | -2.671767 | 2.815789  |
| Al | 3.371089  | 1.855692  | -2.614713 |
| Al | 3.648092  | 2.117644  | 2.052372  |
| Al | 4.020091  | -0.714455 | -1.584577 |
| Al | 4.182361  | -0.553967 | 1.253626  |
| Al | 5.006713  | 1.606700  | -0.347333 |
| Mg | -1.459253 | 5.131667  | -1.787139 |

Al50Mg0

|    |           |           |           |
|----|-----------|-----------|-----------|
| Al | -0.571615 | 0.635797  | -5.201242 |
| Al | 1.176612  | -1.396656 | -4.436394 |
| Al | 1.892205  | 1.374476  | -4.077466 |
| Al | -1.706370 | -1.635924 | -4.001582 |
| Al | -0.465866 | 2.765900  | -3.378529 |
| Al | -2.650964 | 0.948701  | -3.344561 |
| Al | -0.000511 | -3.682743 | -3.269079 |
| Al | 3.643639  | -0.623969 | -3.246340 |
| Al | 4.316020  | 2.008985  | -2.758248 |
| Al | -2.697421 | -3.909122 | -2.617556 |
| Al | -0.094757 | 0.102277  | -2.602550 |
| Al | 2.028939  | 3.465213  | -2.135164 |
| Al | -3.703972 | -1.385784 | -2.020091 |
| Al | 1.787433  | -2.019400 | -1.820411 |
| Al | -0.325525 | 4.787994  | -1.434956 |
| Al | -2.529698 | 3.053641  | -1.425625 |
| Al | 2.321046  | 0.808885  | -1.388110 |
| Al | -4.614189 | 1.185049  | -1.365658 |
| Al | -1.091868 | -2.202639 | -1.304721 |
| Al | 1.471590  | -4.611354 | -1.238143 |
| Al | 4.818699  | 0.156766  | -0.732098 |
| Al | 0.008009  | 2.203336  | -0.719773 |
| Al | -2.117304 | 0.393539  | -0.686069 |
| Al | -1.097078 | -4.773514 | -0.510237 |
| Al | 3.874711  | 2.706508  | -0.073099 |
| Al | 0.439619  | -0.470888 | -0.011383 |
| Al | -3.325311 | -3.246142 | 0.071563  |
| Al | 1.503157  | 4.114670  | 0.598498  |
| Al | 2.952388  | -1.291368 | 0.663197  |
| Al | -4.263501 | -0.654989 | 0.712220  |
| Al | 0.739349  | -3.061713 | 0.816052  |
| Al | -1.320015 | 3.910636  | 1.021125  |
| Al | -3.514066 | 2.074813  | 1.050558  |
| Al | 1.829137  | 1.428337  | 1.291781  |
| Al | -1.670747 | -1.464942 | 1.362165  |
| Al | -0.956260 | 1.244549  | 1.705810  |
| Al | 4.306692  | 0.723334  | 1.997912  |
| Al | -1.455860 | -4.014637 | 2.186110  |
| Al | 3.289881  | 3.271045  | 2.600859  |
| Al | 0.729752  | -0.773373 | 2.614860  |
| Al | -3.732409 | -2.507635 | 2.750431  |
| Al | 0.519768  | 3.136865  | 3.072153  |
| Al | -3.058993 | 0.187221  | 3.144853  |
| Al | 3.179613  | -1.472922 | 3.391305  |
| Al | -2.260257 | 2.864183  | 3.431939  |
| Al | 0.953001  | -3.299603 | 3.522298  |
| Al | 2.251446  | 1.092552  | 4.010228  |
| Al | -1.358012 | -1.857677 | 4.098855  |
| Al | -0.579269 | 0.871711  | 4.425851  |
| Al | 1.129129  | -1.159988 | 5.258460  |

55

Al0mg55

|    |           |           |           |
|----|-----------|-----------|-----------|
| Mg | -0.389985 | -0.914379 | -5.823529 |
| Mg | 3.074201  | -1.917578 | -5.823409 |
| Mg | -3.844445 | 0.111612  | -5.678697 |
| Mg | 2.246159  | 1.543960  | -5.241457 |
| Mg | -1.256780 | 2.571333  | -5.168196 |
| Mg | 1.362100  | 4.967065  | -4.529083 |
| Mg | 0.625803  | -4.050836 | -4.254544 |
| Mg | -2.877156 | -3.023447 | -4.181240 |
| Mg | 4.891110  | -0.073189 | -3.312630 |

|    |           |           |           |
|----|-----------|-----------|-----------|
| Mg | -4.279722 | 2.616530  | -3.120826 |
| Mg | 1.520598  | -0.948506 | -2.880455 |
| Mg | -1.901599 | 0.055220  | -2.808855 |
| Mg | 3.889701  | -3.530958 | -2.702696 |
| Mg | 4.024289  | 3.412584  | -2.657365 |
| Mg | -1.643628 | 5.074874  | -2.538768 |
| Mg | -1.838152 | -6.083236 | -2.579748 |
| Mg | -5.281063 | -0.841317 | -2.510863 |
| Mg | 0.673759  | 2.456897  | -2.240208 |
| Mg | -0.909224 | -3.008991 | -1.276024 |
| Mg | 1.402575  | -5.640015 | -1.060413 |
| Mg | 1.620260  | 5.594850  | -0.987008 |
| Mg | -4.265272 | -3.977768 | -0.941799 |
| Mg | 6.586230  | 1.773173  | -0.719440 |
| Mg | -4.608447 | 5.056316  | -0.485306 |
| Mg | 3.257780  | 0.877078  | -0.355868 |
| Mg | -2.279491 | 2.501052  | -0.240026 |
| Mg | 5.667870  | -1.662305 | -0.118546 |
| Mg | 0.000015  | 0.000012  | -0.000007 |
| Mg | -5.667884 | 1.662263  | 0.118561  |
| Mg | 2.279477  | -2.501042 | 0.240054  |
| Mg | -3.257790 | -0.877085 | 0.355895  |
| Mg | 4.608402  | -5.056335 | 0.485323  |
| Mg | -6.586208 | -1.773198 | 0.719478  |
| Mg | 4.265274  | 3.977767  | 0.941830  |
| Mg | -1.620255 | -5.594864 | 0.986928  |
| Mg | -1.402631 | 5.640029  | 1.060370  |
| Mg | 0.909213  | 3.009026  | 1.275989  |
| Mg | -0.673737 | -2.456922 | 2.240213  |
| Mg | 5.281085  | 0.841285  | 2.510874  |
| Mg | 1.838074  | 6.083311  | 2.579654  |
| Mg | 1.643621  | -5.074912 | 2.538745  |
| Mg | -4.024253 | -3.412671 | 2.657338  |
| Mg | -3.889738 | 3.530924  | 2.702705  |
| Mg | 1.901603  | -0.055157 | 2.808874  |
| Mg | -1.520592 | 0.948509  | 2.880500  |
| Mg | 4.279716  | -2.616511 | 3.120862  |
| Mg | -4.891076 | 0.073083  | 3.312697  |
| Mg | 2.877120  | 3.023534  | 4.181237  |
| Mg | -0.625822 | 4.050874  | 4.254496  |
| Mg | -1.362093 | -4.967111 | 4.529021  |
| Mg | 1.256827  | -2.571343 | 5.168185  |
| Mg | -2.246079 | -1.543968 | 5.241480  |
| Mg | 3.844436  | -0.111574 | 5.678707  |
| Mg | 0.390007  | 0.914423  | 5.823578  |
| Mg | -3.074180 | 1.917634  | 5.823411  |

|         |           |           |           |
|---------|-----------|-----------|-----------|
| 55      |           |           |           |
| Al5Mg50 |           |           |           |
| Al      | -2.889284 | -2.431371 | 1.931158  |
| Al      | -2.836632 | 3.937518  | 1.984189  |
| Al      | -0.353617 | 5.067510  | 1.656856  |
| Al      | 1.724378  | -4.892092 | -1.650276 |
| Al      | 3.770823  | -0.335171 | -3.369408 |
| Mg      | -5.806183 | 2.492680  | 2.339525  |
| Mg      | -5.676921 | -3.970998 | 2.146464  |
| Mg      | -5.405054 | -1.026628 | 0.423978  |
| Mg      | -5.387345 | 5.390691  | 0.610222  |
| Mg      | -5.107685 | -1.049973 | 3.860400  |
| Mg      | -4.938653 | 5.355382  | 3.995840  |
| Mg      | -4.168740 | 2.454672  | -0.687941 |
| Mg      | -3.928680 | -3.862858 | -0.798057 |
| Mg      | -3.456046 | 2.401411  | 4.838761  |
| Mg      | -3.426873 | -3.901696 | 4.719327  |
| Mg      | -2.996939 | 0.731712  | 1.953994  |
| Mg      | -2.816505 | 7.120475  | 2.019991  |
| Mg      | -2.709441 | -5.671580 | 1.868444  |
| Mg      | -2.349726 | 5.314473  | -0.862740 |
| Mg      | -2.263270 | -0.853064 | -0.989278 |
| Mg      | -1.732993 | -0.919613 | 4.591258  |
| Mg      | -1.597693 | 5.254626  | 4.620545  |
| Mg      | -1.462976 | 2.559750  | -3.292329 |
| Mg      | -1.040063 | -6.583978 | -1.660707 |
| Mg      | -0.852097 | 2.381809  | 0.056455  |
| Mg      | -0.802633 | -3.571656 | -3.326910 |

|    |           |           |           |
|----|-----------|-----------|-----------|
| Mg | -0.688013 | -3.703638 | 0.037688  |
| Mg | -0.378540 | 2.337148  | 3.385850  |
| Mg | -0.289212 | -3.745950 | 3.384884  |
| Mg | -0.244132 | 7.852291  | -0.041665 |
| Mg | -0.036953 | -0.799985 | 1.593476  |
| Mg | 0.244109  | 7.785901  | 3.333421  |
| Mg | 0.721462  | -0.245136 | -4.611848 |
| Mg | 0.957563  | 4.955269  | -1.341795 |
| Mg | 0.961576  | -6.278407 | -4.430422 |
| Mg | 0.997159  | -6.423858 | 1.105385  |
| Mg | 1.371250  | -1.634063 | -1.588630 |
| Mg | 1.735905  | 1.671372  | -2.017630 |
| Mg | 1.754902  | 4.827337  | 4.128914  |
| Mg | 2.063774  | -8.057716 | -1.726031 |
| Mg | 2.224851  | 3.062480  | 1.238128  |
| Mg | 2.441366  | -3.185268 | -4.361439 |
| Mg | 2.508936  | -3.317126 | 1.151365  |
| Mg | 2.577383  | 6.441872  | 1.248234  |
| Mg | 2.669360  | 0.305213  | 3.389028  |
| Mg | 3.019777  | 2.289644  | -5.074780 |
| Mg | 3.494838  | -0.758369 | -6.537237 |
| Mg | 3.941944  | -0.026576 | -0.077851 |
| Mg | 4.207792  | -5.940081 | -3.411705 |
| Mg | 4.216523  | -6.042723 | 0.004363  |
| Mg | 4.423508  | -3.040856 | -1.630679 |
| Mg | 5.009710  | 2.428691  | -2.261172 |
| Mg | 5.768549  | -2.504954 | -4.695735 |
| Mg | 6.143706  | 0.887546  | -5.116715 |
| Mg | 6.691754  | -0.532088 | -2.055163 |

|          |           |           |           |
|----------|-----------|-----------|-----------|
| 55       |           |           |           |
| Al10Mg45 |           |           |           |
| Al       | 0.611790  | 0.519748  | -6.639030 |
| Al       | -1.259817 | -0.100384 | -4.714285 |
| Al       | 1.378396  | -0.820164 | -4.354885 |
| Al       | 0.643508  | 1.832309  | -4.214871 |
| Al       | -0.107237 | 0.088634  | -2.246287 |
| Al       | -0.741122 | -0.361975 | 2.967450  |
| Al       | 1.786230  | 0.291416  | 3.857145  |
| Al       | -2.395830 | -0.931290 | 5.072012  |
| Al       | 0.283587  | -1.623888 | 5.160113  |
| Al       | -0.450631 | 1.026048  | 5.299683  |
| Mg       | 0.533211  | -1.132426 | -9.403216 |
| Mg       | -0.378431 | 2.158442  | -9.229531 |
| Mg       | 2.890562  | 1.264619  | -8.791113 |
| Mg       | -2.342525 | -0.241610 | -7.721164 |
| Mg       | 2.950008  | -1.688143 | -7.004598 |
| Mg       | 1.474389  | 3.638171  | -6.723446 |
| Mg       | -0.261430 | -2.598799 | -6.475835 |
| Mg       | -1.733479 | 2.714580  | -6.195411 |
| Mg       | 3.546842  | 1.272196  | -5.488396 |
| Mg       | -3.419824 | -2.428123 | -5.257259 |
| Mg       | -4.322152 | 0.828762  | -5.085390 |
| Mg       | 2.142904  | -3.946746 | -4.500660 |
| Mg       | -0.309506 | 4.904787  | -4.033434 |
| Mg       | 4.477887  | -1.577787 | -3.894526 |
| Mg       | 2.925777  | 4.024205  | -3.598757 |
| Mg       | -0.793320 | -2.907949 | -3.164843 |
| Mg       | -2.258763 | 2.381311  | -2.885690 |
| Mg       | -3.216772 | -0.774371 | -2.218228 |
| Mg       | 3.008975  | 0.949047  | -2.189807 |
| Mg       | 2.047116  | -2.210504 | -1.497861 |
| Mg       | 0.580871  | 3.081549  | -1.218507 |
| Mg       | -1.018770 | -2.033900 | 0.128721  |
| Mg       | -1.914284 | 1.198139  | 0.299152  |
| Mg       | 1.348925  | 0.338361  | 0.665383  |
| Mg       | 4.306576  | -0.688711 | 2.057440  |
| Mg       | -3.727908 | -1.143910 | 2.101513  |
| Mg       | 3.396390  | 2.596376  | 2.230409  |
| Mg       | 1.532489  | -2.563572 | 2.321856  |
| Mg       | 0.061582  | 2.745259  | 2.601502  |
| Mg       | -1.551253 | -3.455836 | 3.216051  |
| Mg       | -3.017461 | 1.835852  | 3.494847  |
| Mg       | -4.564818 | -3.282744 | 4.697347  |
| Mg       | -5.473504 | -0.003213 | 4.870164  |

|    |           |           |          |
|----|-----------|-----------|----------|
| Mg | 1.113592  | -4.729291 | 4.892467 |
| Mg | 4.688607  | 1.035452  | 4.998331 |
| Mg | 3.448552  | -2.181490 | 5.074377 |
| Mg | 1.975706  | 3.134456  | 5.354287 |
| Mg | -1.339985 | 4.125994  | 5.358852 |
| Mg | -1.707041 | -3.690690 | 6.591150 |
| Mg | -3.180380 | 1.626800  | 6.871284 |
| Mg | 2.131280  | 0.218366  | 7.059930 |
| Mg | -4.219546 | -1.572021 | 7.642052 |
| Mg | 1.475839  | -3.027535 | 7.798406 |
| Mg | -0.978748 | -0.691326 | 7.971554 |
| Mg | -0.077052 | 2.577518  | 8.093550 |

55

Al15Mg40

|    |           |           |           |
|----|-----------|-----------|-----------|
| Al | -0.433569 | 3.679130  | -2.706389 |
| Al | -1.060531 | 1.189384  | -1.770993 |
| Al | 1.096127  | -0.604167 | -1.582818 |
| Al | 1.483826  | 2.202095  | -1.367451 |
| Al | 0.233707  | -3.287583 | -1.253338 |
| Al | 1.285746  | 4.909672  | -0.936735 |
| Al | -1.364809 | -1.194735 | -0.446980 |
| Al | -0.698360 | 3.261678  | 0.025598  |
| Al | 0.283584  | 0.789305  | 0.666693  |
| Al | -2.427512 | 1.097302  | 0.685648  |
| Al | 1.034069  | -1.824999 | 0.918843  |
| Al | 1.271935  | -4.510300 | 1.056576  |
| Al | -1.264456 | -3.436459 | 1.113170  |
| Al | -1.190677 | -0.900685 | 2.300737  |
| Al | 0.381213  | -3.010954 | 3.278375  |
| Mg | -0.091857 | 3.965032  | -5.840013 |
| Mg | -2.472559 | 1.794090  | -4.488997 |
| Mg | 0.843204  | 1.034249  | -4.323755 |
| Mg | -2.758833 | 5.268485  | -4.148352 |
| Mg | 1.940647  | -2.520739 | -3.917325 |
| Mg | -0.633637 | -4.898341 | -3.776465 |
| Mg | 2.618705  | 3.863430  | -3.774299 |
| Mg | -1.276772 | -1.472571 | -3.605589 |
| Mg | 0.440743  | 6.575807  | -3.557255 |
| Mg | 3.797424  | 0.497632  | -2.830462 |
| Mg | 3.605918  | 6.681997  | -2.168954 |
| Mg | -3.962810 | -0.160484 | -1.941054 |
| Mg | 2.106440  | -5.761794 | -1.802518 |
| Mg | -3.020067 | -3.590457 | -1.617649 |
| Mg | -3.513891 | 3.178718  | -1.544482 |
| Mg | -1.810496 | 6.032632  | -0.956345 |
| Mg | 3.418340  | -2.769709 | -0.910941 |
| Mg | 4.275053  | 3.500194  | -0.833868 |
| Mg | -1.045839 | -6.148128 | -0.518059 |
| Mg | 0.887501  | 8.012979  | -0.437641 |
| Mg | 3.435995  | 0.296030  | 0.493917  |
| Mg | -5.511234 | 1.459673  | 0.758103  |
| Mg | 4.234599  | -5.581092 | 0.945073  |
| Mg | -4.073742 | -1.718207 | 1.077198  |
| Mg | 3.274579  | 6.197159  | 1.198350  |
| Mg | 1.509533  | -7.635845 | 1.205979  |
| Mg | -3.866543 | -5.185783 | 1.306574  |
| Mg | 2.079409  | 3.114540  | 1.715027  |
| Mg | -3.276507 | 4.005170  | 1.730973  |
| Mg | -0.121869 | 5.643807  | 1.968015  |
| Mg | 3.575407  | -2.645576 | 2.514414  |
| Mg | -0.941442 | -5.955646 | 2.960631  |
| Mg | -0.823645 | 2.262326  | 3.231423  |
| Mg | 1.714701  | 0.044276  | 3.412753  |
| Mg | -3.679768 | 0.517775  | 3.606115  |
| Mg | -2.828450 | -3.123530 | 3.883852  |
| Mg | 2.288492  | -5.479671 | 3.920193  |
| Mg | -0.845562 | -0.843246 | 5.412742  |
| Mg | 2.319895  | -2.422096 | 5.695110  |
| Mg | -0.441354 | -4.391768 | 5.976645  |

55

Al20Mg35

|    |           |           |           |
|----|-----------|-----------|-----------|
| Al | -2.901668 | -0.911331 | 4.069527  |
| Al | -2.435459 | 0.825273  | 2.092363  |
| Al | -2.344754 | -0.490195 | -0.410943 |

|    |           |           |           |
|----|-----------|-----------|-----------|
| Al | -1.984861 | 1.208514  | -2.631622 |
| Al | -1.805782 | -2.027234 | 1.902523  |
| Al | -1.367950 | -1.586104 | -2.817456 |
| Al | -1.204339 | 2.124002  | -0.078536 |
| Al | -0.302285 | -0.317543 | 3.769081  |
| Al | -0.204657 | -2.404451 | -0.379790 |
| Al | -0.102497 | -0.099455 | 1.155388  |
| Al | 0.037804  | 2.227504  | 2.463659  |
| Al | 0.142480  | 0.126681  | -1.430688 |
| Al | 0.382173  | 0.352694  | -4.033424 |
| Al | 0.475686  | 2.636915  | -2.280292 |
| Al | 1.036839  | -2.298048 | 2.162512  |
| Al | 1.473521  | -1.883154 | -2.580964 |
| Al | 1.628092  | 1.817844  | 0.167855  |
| Al | 2.179906  | 0.315190  | 2.495507  |
| Al | 2.244165  | -0.972912 | -0.017837 |
| Al | 2.611934  | 0.726040  | -2.245491 |
| Mg | -5.075175 | 1.374414  | 3.672625  |
| Mg | -4.856739 | -1.162821 | 1.365884  |
| Mg | -4.501477 | -0.818610 | -2.630567 |
| Mg | -4.441391 | 2.447752  | -3.978665 |
| Mg | -4.347196 | 1.935063  | -0.347762 |
| Mg | -3.927091 | -3.827264 | 3.326114  |
| Mg | -3.143447 | -3.518073 | -0.710412 |
| Mg | -3.115333 | -3.560226 | -4.377634 |
| Mg | -2.655218 | 3.985300  | 1.995313  |
| Mg | -2.412120 | -0.168534 | -5.472445 |
| Mg | -2.245935 | 4.358821  | -1.975961 |
| Mg | -1.976334 | 2.136487  | 4.961197  |
| Mg | -1.195085 | -0.712351 | 6.738777  |
| Mg | -1.019696 | 3.019389  | -5.068012 |
| Mg | -0.759565 | -3.376315 | 4.594228  |
| Mg | -0.683154 | -4.948173 | 1.400853  |
| Mg | -0.265772 | -4.610687 | -2.572510 |
| Mg | 0.159919  | 4.895582  | 3.958454  |
| Mg | 0.199043  | -2.501885 | -5.435204 |
| Mg | 0.469695  | 4.746165  | 0.323495  |
| Mg | 0.853053  | 5.525722  | -3.227035 |
| Mg | 1.518541  | 1.793739  | 5.259200  |
| Mg | 2.276681  | -1.640694 | 5.030635  |
| Mg | 2.307752  | -4.834509 | 3.311098  |
| Mg | 2.424954  | -4.110942 | -0.265729 |
| Mg | 2.452828  | 2.656155  | -4.776920 |
| Mg | 3.000732  | -4.202557 | -3.874050 |
| Mg | 3.027265  | 3.428581  | 2.444580  |
| Mg | 3.206089  | -0.756239 | -5.003894 |
| Mg | 3.394522  | 3.769397  | -1.498910 |
| Mg | 4.252622  | -2.122266 | 2.075162  |
| Mg | 4.618803  | -1.776319 | -1.867827 |
| Mg | 4.660928  | 1.003637  | 0.380350  |
| Mg | 4.784879  | 0.787858  | 4.033199  |
| Mg | 5.454076  | 1.414174  | -3.158999 |

55  
Al<sub>25</sub>Mg<sub>30</sub>

|    |           |           |           |
|----|-----------|-----------|-----------|
| Al | -1.069692 | 1.049480  | -3.588091 |
| Al | 1.696253  | 0.427481  | -3.081668 |
| Al | 0.861483  | 3.164894  | -2.957944 |
| Al | 2.117423  | -2.312068 | -2.300296 |
| Al | -0.407264 | -1.173846 | -2.056142 |
| Al | -1.864615 | 3.190696  | -1.746637 |
| Al | 4.088566  | -0.238932 | -1.653799 |
| Al | -2.561430 | 0.462893  | -1.207525 |
| Al | 0.001605  | 1.456499  | -1.182694 |
| Al | 2.651273  | 2.142315  | -0.968708 |
| Al | 1.770327  | -0.409152 | -0.467972 |
| Al | -2.292542 | -2.298303 | -0.326292 |
| Al | 0.492878  | 3.854918  | -0.131343 |
| Al | 0.547369  | -2.816312 | 0.048624  |
| Al | 3.351849  | -2.311558 | 0.361325  |
| Al | -0.657210 | -0.388498 | 0.612346  |
| Al | -1.595912 | 2.196443  | 0.928555  |
| Al | 3.679697  | 0.493373  | 1.156507  |
| Al | 1.142018  | 1.608078  | 1.371809  |
| Al | -3.097366 | -0.120870 | 1.498014  |

|    |           |           |           |
|----|-----------|-----------|-----------|
| Al | -3.674854 | -2.716082 | 2.003254  |
| Al | 1.512696  | -1.082828 | 2.184751  |
| Al | -1.019735 | -2.312720 | 2.337514  |
| Al | -0.726468 | 0.513721  | 3.138986  |
| Al | -2.771510 | -1.094270 | 4.001989  |
| Mg | 1.085403  | 1.798013  | -5.831624 |
| Mg | 0.299563  | -1.645559 | -5.036491 |
| Mg | -1.598674 | 3.902951  | -4.839645 |
| Mg | 3.869332  | -1.137955 | -4.706708 |
| Mg | 4.038490  | 2.387128  | -3.762611 |
| Mg | -4.167752 | 1.848093  | -3.506297 |
| Mg | -3.131022 | -1.642663 | -3.484489 |
| Mg | -0.664677 | -4.243986 | -2.488065 |
| Mg | -0.436485 | 5.989414  | -2.268837 |
| Mg | 5.142742  | -3.207599 | -2.115556 |
| Mg | 2.969154  | 5.180140  | -1.664475 |
| Mg | 2.453256  | -5.135295 | -0.831021 |
| Mg | -5.265080 | -1.102712 | -0.544554 |
| Mg | 5.752738  | 2.244064  | -0.539497 |
| Mg | -4.528315 | -4.477243 | -0.481974 |
| Mg | -4.603523 | 2.467820  | 0.078193  |
| Mg | 6.304671  | -1.121071 | 0.455371  |
| Mg | -2.279746 | 5.237724  | 0.670037  |
| Mg | -1.467360 | -5.108841 | 0.989778  |
| Mg | 3.325737  | 3.788374  | 1.659058  |
| Mg | 1.701307  | -4.183157 | 2.625977  |
| Mg | -5.808574 | -0.339487 | 2.900720  |
| Mg | -0.106534 | 3.787873  | 3.207001  |
| Mg | 4.340687  | -1.745706 | 3.345423  |
| Mg | -3.411808 | 2.224727  | 3.555768  |
| Mg | 2.359298  | 1.186388  | 4.203617  |
| Mg | -2.049703 | -4.305339 | 4.419525  |
| Mg | -5.144836 | -3.040895 | 4.792707  |
| Mg | 0.385506  | -1.781578 | 5.090300  |
| Mg | -1.538635 | 0.891025  | 6.133806  |

55

Al30Mg25

|    |           |           |           |
|----|-----------|-----------|-----------|
| Al | -1.575780 | -1.780401 | -3.992501 |
| Al | -0.870397 | 1.219906  | -3.570429 |
| Al | 0.749773  | -3.333555 | -3.011276 |
| Al | 1.867010  | 1.196707  | -2.480612 |
| Al | 0.557663  | 3.535944  | -2.354640 |
| Al | 0.128585  | -0.877145 | -2.224110 |
| Al | 2.819799  | -1.439947 | -2.056865 |
| Al | -3.070511 | 2.225432  | -1.934555 |
| Al | -2.581707 | -0.397224 | -1.859028 |
| Al | -1.579904 | -3.007181 | -1.456262 |
| Al | -1.651162 | 4.296997  | -1.165949 |
| Al | -0.623419 | 1.581832  | -0.908787 |
| Al | 3.930818  | 0.792342  | -0.522811 |
| Al | 1.022952  | -2.829712 | -0.368450 |
| Al | 1.515471  | -0.083366 | -0.059290 |
| Al | 1.725845  | 2.585224  | 0.045150  |
| Al | -0.967412 | -0.973592 | 0.266965  |
| Al | -3.444091 | -1.838608 | 0.436819  |
| Al | -2.784757 | 0.978971  | 0.633758  |
| Al | 3.382659  | -1.800857 | 0.753056  |
| Al | -0.983083 | 3.336768  | 1.177682  |
| Al | -1.136551 | -3.406502 | 1.356298  |
| Al | -0.045868 | 1.021739  | 1.961403  |
| Al | 0.939653  | -1.674190 | 2.137123  |
| Al | 2.653226  | 0.713853  | 2.223482  |
| Al | 1.402081  | 3.308224  | 2.597620  |
| Al | -1.816668 | -0.878968 | 2.801744  |
| Al | -2.415250 | 1.943553  | 3.098590  |
| Al | 0.684968  | -0.174220 | 4.285726  |
| Al | -0.178142 | 2.292532  | 4.444847  |
| Mg | 1.418947  | 2.668208  | -5.250128 |
| Mg | 1.419354  | -0.861989 | -5.036974 |
| Mg | -3.780791 | 0.530928  | -4.616256 |
| Mg | -1.956595 | 4.083082  | -4.312979 |
| Mg | -1.822240 | -4.932756 | -3.946254 |
| Mg | 4.676372  | 0.568407  | -3.667962 |
| Mg | -4.488270 | -2.714787 | -2.651877 |

|    |           |           |           |
|----|-----------|-----------|-----------|
| Mg | 3.780166  | 3.697658  | -2.060490 |
| Mg | 3.467977  | -4.441412 | -1.395899 |
| Mg | 5.855634  | -1.679405 | -1.193841 |
| Mg | -5.492584 | 0.354555  | -0.873028 |
| Mg | -0.070277 | -5.710027 | -0.820238 |
| Mg | -3.538315 | -4.992290 | -0.002816 |
| Mg | 0.982295  | 5.622746  | 0.182067  |
| Mg | -4.120534 | 3.788454  | 0.836187  |
| Mg | 4.423679  | 3.281978  | 1.523871  |
| Mg | 5.715298  | -0.013113 | 1.975660  |
| Mg | 1.977618  | -4.606849 | 2.023920  |
| Mg | -4.904771 | -0.043004 | 2.731765  |
| Mg | -3.718999 | -3.369836 | 3.205717  |
| Mg | -1.281513 | 5.100893  | 3.680820  |
| Mg | 3.441493  | -1.814946 | 4.027988  |
| Mg | -0.417333 | -3.184903 | 4.535219  |
| Mg | 2.928908  | 1.977659  | 5.094119  |
| Mg | -2.151323 | 0.156194  | 5.756704  |

55

Al<sub>35</sub>Mg<sub>20</sub>

|    |           |           |           |
|----|-----------|-----------|-----------|
| Al | 2.077106  | -0.669321 | -4.199095 |
| Al | -0.225580 | 0.906434  | -3.909182 |
| Al | 0.774920  | -2.965809 | -3.469560 |
| Al | -1.787632 | -4.059497 | -3.176192 |
| Al | -1.564494 | -1.395942 | -3.127309 |
| Al | 0.272927  | 3.562704  | -3.098762 |
| Al | 2.193880  | 1.647815  | -2.739907 |
| Al | -2.665669 | 1.038940  | -2.508218 |
| Al | 0.796273  | -0.730149 | -1.865177 |
| Al | 3.551540  | -0.582707 | -1.756092 |
| Al | -2.088837 | 3.717203  | -1.753735 |
| Al | -0.302078 | 1.723056  | -1.249190 |
| Al | -3.216399 | -2.690827 | -1.191820 |
| Al | -0.519164 | -3.083824 | -1.080690 |
| Al | 2.233405  | -2.936612 | -0.973057 |
| Al | 4.169977  | 2.041990  | -0.897062 |
| Al | 1.760038  | 3.511103  | -0.704628 |
| Al | -4.300955 | -0.226025 | -0.559745 |
| Al | -1.634712 | -0.590632 | -0.479069 |
| Al | 1.979033  | 0.851389  | 0.050632  |
| Al | -2.780369 | 1.915269  | 0.144100  |
| Al | -0.656675 | 3.651418  | 0.699000  |
| Al | 0.670743  | -1.474494 | 0.829637  |
| Al | 3.422354  | -1.327436 | 0.939906  |
| Al | 0.655709  | -4.180850 | 1.080651  |
| Al | -1.788929 | -2.707077 | 1.336084  |
| Al | -0.427449 | 0.997829  | 1.440559  |
| Al | 4.063860  | 1.334003  | 1.729666  |
| Al | -2.874296 | -0.219388 | 1.951528  |
| Al | 1.620902  | 2.779398  | 1.993913  |
| Al | -2.275896 | 2.459844  | 2.750609  |
| Al | 1.902201  | 0.116507  | 2.804751  |
| Al | 1.841125  | -2.591242 | 2.980716  |
| Al | -0.585233 | -1.091929 | 3.255381  |
| Al | -0.008695 | 1.596076  | 4.036483  |
| Mg | -0.436437 | -1.532080 | -6.033493 |
| Mg | -2.328248 | 3.088465  | -4.891941 |
| Mg | -4.654285 | -1.243440 | -3.615657 |
| Mg | 3.977477  | -3.156787 | -3.596239 |
| Mg | 0.920198  | -5.741981 | -1.874150 |
| Mg | -5.207948 | 2.710164  | -1.707195 |
| Mg | -0.022011 | 6.107189  | -1.188960 |
| Mg | -2.187813 | -5.544517 | -0.123535 |
| Mg | 6.222968  | -0.248378 | -0.046346 |
| Mg | -3.550782 | 4.869786  | 0.940694  |
| Mg | 4.148983  | 4.488748  | 1.159457  |
| Mg | 3.836615  | -4.452639 | 1.310397  |
| Mg | -4.953033 | -2.583144 | 1.495865  |
| Mg | -5.370919 | 1.682972  | 1.910413  |
| Mg | -0.235965 | 4.762279  | 3.641199  |
| Mg | 4.620969  | -1.099324 | 3.845191  |
| Mg | -0.759217 | -4.183523 | 3.951719  |
| Mg | 3.121897  | 2.302102  | 4.719001  |
| Mg | -2.758202 | 0.323870  | 5.080684  |



|          |           |           |           |
|----------|-----------|-----------|-----------|
| Mg       | 1.332823  | -0.876978 | 5.737768  |
| 55       |           |           |           |
| Al40Mg15 |           |           |           |
| Al       | -2.024781 | -0.244585 | -4.110352 |
| Al       | -0.806647 | 2.602880  | -3.962689 |
| Al       | 0.152610  | -2.140727 | -3.951260 |
| Al       | 2.751259  | -0.445534 | -3.870147 |
| Al       | 2.031623  | 2.347479  | -3.746286 |
| Al       | 0.314883  | 0.342647  | -2.973213 |
| Al       | -2.013728 | 1.262585  | -1.854383 |
| Al       | -1.837394 | 4.054237  | -1.775528 |
| Al       | 1.578831  | -1.716930 | -1.704570 |
| Al       | 4.335684  | -1.104807 | -1.700045 |
| Al       | -1.390262 | -1.458150 | -1.648900 |
| Al       | -0.183448 | -3.890010 | -1.565195 |
| Al       | 0.467573  | 2.628629  | -1.507057 |
| Al       | 2.533700  | 0.936565  | -1.464191 |
| Al       | 2.918333  | 3.539593  | -0.773493 |
| Al       | -2.752268 | -3.397790 | -0.499134 |
| Al       | -3.861829 | 2.697637  | -0.389692 |
| Al       | 3.450786  | -3.256336 | -0.241954 |
| Al       | 0.084031  | 0.091229  | -0.096149 |
| Al       | 0.651363  | 4.523669  | 0.426457  |
| Al       | -1.278319 | 2.590888  | 0.465775  |
| Al       | -2.886189 | 0.263083  | 0.485385  |
| Al       | 4.308242  | 1.566001  | 0.509664  |
| Al       | 2.829553  | -0.721655 | 0.561627  |
| Al       | 0.913882  | -2.791950 | 0.628949  |
| Al       | 1.537861  | 1.888729  | 1.191535  |
| Al       | -1.116538 | -4.498272 | 1.269982  |
| Al       | -4.153426 | -2.049921 | 1.310169  |
| Al       | -1.402202 | -1.746024 | 1.403420  |
| Al       | -3.225671 | 2.396854  | 2.340104  |
| Al       | -0.991255 | 0.874435  | 2.461607  |
| Al       | 3.016345  | -2.651121 | 2.481575  |
| Al       | 1.051593  | -0.773872 | 2.520364  |
| Al       | -0.265683 | 3.494347  | 2.810359  |
| Al       | 3.453744  | 0.491728  | 2.895760  |
| Al       | -3.305587 | -0.342205 | 3.216497  |
| Al       | 0.312854  | -3.304168 | 3.290853  |
| Al       | -2.519414 | -3.105396 | 3.348546  |
| Al       | 1.172575  | 1.504851  | 4.014580  |
| Al       | -0.924619 | -1.087914 | 4.364789  |
| Mg       | 0.522495  | 0.450496  | -6.070097 |
| Mg       | -4.035483 | 2.577588  | -3.744859 |
| Mg       | -2.697415 | -3.484673 | -3.710231 |
| Mg       | 3.003819  | -3.754663 | -3.456075 |
| Mg       | 0.989763  | 5.337746  | -2.844073 |
| Mg       | 5.131409  | 1.907418  | -2.749391 |
| Mg       | -4.511560 | -0.873866 | -1.910958 |
| Mg       | -2.478788 | 5.361627  | 1.160830  |
| Mg       | 5.769501  | -1.320831 | 1.268761  |
| Mg       | -5.831149 | 0.749398  | 1.430175  |
| Mg       | 1.926953  | -5.587116 | 1.486573  |
| Mg       | -4.194351 | -5.227404 | 1.679641  |
| Mg       | 3.166228  | 3.946410  | 2.672941  |
| Mg       | -1.862055 | 1.909124  | 5.266021  |
| Mg       | 2.172566  | -1.361951 | 5.356984  |
| 55       |           |           |           |
| Al45Mg10 |           |           |           |
| Al       | -4.505035 | -0.945809 | -0.234657 |
| Al       | -4.013956 | 1.378318  | -1.813134 |
| Al       | -3.873594 | -0.317131 | 2.475227  |
| Al       | -3.410445 | -1.206693 | -2.856164 |
| Al       | -3.275083 | -2.906183 | 1.433861  |
| Al       | -3.078449 | 3.438252  | -0.075364 |
| Al       | -2.988183 | 2.409874  | 2.602268  |
| Al       | -2.568558 | 0.827823  | 0.405008  |
| Al       | -1.983938 | 3.177383  | -2.696708 |
| Al       | -1.963224 | -1.774232 | -0.643158 |
| Al       | -1.765523 | 0.464654  | 4.261449  |
| Al       | -1.503622 | -3.328404 | -2.808713 |
| Al       | -1.468612 | 0.565661  | -2.229336 |
| Al       | -1.418573 | -4.376738 | -0.156747 |

|    |           |           |           |
|----|-----------|-----------|-----------|
| Al | -1.333228 | -1.146171 | 2.089487  |
| Al | -1.009901 | -0.999663 | -4.383217 |
| Al | -0.975801 | 4.200976  | 1.722126  |
| Al | -0.877567 | 3.109838  | 4.288369  |
| Al | -0.791069 | -3.751438 | 2.555170  |
| Al | -0.531066 | 2.639886  | -0.484447 |
| Al | -0.433741 | 1.545757  | 2.126101  |
| Al | -0.104252 | 1.722500  | -4.304705 |
| Al | -0.006659 | -0.020563 | -0.000736 |
| Al | 0.140417  | -1.682985 | 4.287160  |
| Al | 0.452314  | -1.571762 | -2.186811 |
| Al | 0.537328  | -2.625131 | 0.485608  |
| Al | 0.820679  | 3.772775  | -2.580418 |
| Al | 0.980395  | -4.173688 | -1.687404 |
| Al | 1.003397  | 1.051648  | 4.404046  |
| Al | 1.301678  | 1.132106  | -2.030200 |
| Al | 1.422476  | 4.388809  | 0.157155  |
| Al | 1.474372  | -0.547899 | 2.229981  |
| Al | 1.491602  | 3.361375  | 2.835882  |
| Al | 1.791912  | -0.383272 | -4.258528 |
| Al | 1.966825  | 1.789905  | 0.643076  |
| Al | 1.995798  | -3.157919 | 2.699869  |
| Al | 2.574311  | -0.810093 | -0.404363 |
| Al | 2.623024  | 2.275457  | -4.095524 |
| Al | 3.004098  | -2.365593 | -2.571286 |
| Al | 3.090390  | -3.418841 | 0.078364  |
| Al | 3.288082  | 2.933168  | -1.466658 |
| Al | 3.412301  | 1.229591  | 2.854519  |
| Al | 3.887315  | 0.364224  | -2.502915 |
| Al | 4.021216  | -1.355915 | 1.813949  |
| Al | 4.506802  | 0.968693  | 0.233187  |
| Mg | -5.688751 | 1.833920  | 0.912776  |
| Mg | -4.353953 | -3.941381 | -1.425732 |
| Mg | -3.241462 | 1.250644  | -4.948423 |
| Mg | -2.948998 | -2.527156 | 4.627915  |
| Mg | -1.168868 | 5.838347  | -1.069058 |
| Mg | 1.005347  | -3.469666 | -4.842670 |
| Mg | 1.187787  | -5.827159 | 1.075907  |
| Mg | 3.254840  | -1.209364 | 4.949903  |
| Mg | 4.345298  | 3.961990  | 1.419986  |
| Mg | 5.702108  | -1.792724 | -0.911273 |

55

Al50Mg5

|    |           |           |           |
|----|-----------|-----------|-----------|
| Al | -0.399747 | -0.446573 | -4.595388 |
| Al | -1.036359 | -3.130706 | -4.234181 |
| Al | 2.287453  | 0.480332  | -4.001707 |
| Al | 1.609672  | -2.278687 | -3.728269 |
| Al | -2.265992 | 1.596156  | -3.722329 |
| Al | -2.909864 | -1.169716 | -3.444221 |
| Al | 4.190090  | -1.327947 | -3.079512 |
| Al | 2.080320  | 3.095351  | -2.762120 |
| Al | -0.719299 | 3.746548  | -2.593749 |
| Al | -4.666060 | 0.837034  | -2.517272 |
| Al | 0.135852  | 1.193029  | -2.477590 |
| Al | -0.519264 | -1.566697 | -2.109065 |
| Al | 0.315307  | -4.162865 | -2.020162 |
| Al | 4.067883  | 1.237130  | -1.902651 |
| Al | -2.440955 | -3.487547 | -1.846858 |
| Al | 2.093575  | -0.665451 | -1.531818 |
| Al | -3.247753 | 2.987098  | -1.444677 |
| Al | 2.998834  | -3.237239 | -1.427295 |
| Al | -2.323872 | 0.424216  | -1.256658 |
| Al | -4.298937 | -1.440549 | -0.965589 |
| Al | 3.783198  | 3.751468  | -0.650625 |
| Al | 1.096460  | 4.485566  | -0.484945 |
| Al | 1.880962  | 1.874601  | -0.327710 |
| Al | 4.498575  | -1.093909 | -0.313742 |
| Al | -0.865902 | 2.609094  | -0.154203 |
| Al | 0.004188  | -0.008974 | -0.004944 |
| Al | 0.862327  | -2.602798 | 0.160437  |
| Al | -4.519862 | 1.112116  | 0.288899  |
| Al | -1.948978 | -1.917306 | 0.338472  |
| Al | -1.066027 | -4.457630 | 0.490499  |
| Al | 4.279949  | 1.518572  | 0.929692  |

|    |           |           |           |
|----|-----------|-----------|-----------|
| Al | 2.393501  | -0.419471 | 1.297820  |
| Al | -3.000918 | 3.239074  | 1.434576  |
| Al | 3.207399  | -2.983621 | 1.434597  |
| Al | -2.093761 | 0.668893  | 1.539210  |
| Al | 2.454769  | 3.517903  | 1.829743  |
| Al | -4.057585 | -1.185815 | 1.917420  |
| Al | -0.317676 | 4.164611  | 2.027353  |
| Al | 0.514597  | 1.568595  | 2.115445  |
| Al | -0.130011 | -1.163694 | 2.405384  |
| Al | 0.709703  | -3.750522 | 2.643183  |
| Al | -2.043665 | -3.068689 | 2.816808  |
| Al | -4.185226 | 1.337093  | 3.088652  |
| Al | 2.866672  | 1.202561  | 3.447119  |
| Al | -1.611627 | 2.278423  | 3.737708  |
| Al | 2.203442  | -1.603764 | 3.755076  |
| Al | -2.269235 | -0.498246 | 4.036814  |
| Al | 1.024103  | 3.133949  | 4.239485  |
| Al | 0.384159  | 0.416977  | 4.622989  |
| Al | -0.271782 | -2.309351 | 4.835853  |
| Mg | 0.304556  | 2.595870  | -5.431458 |
| Mg | -1.899888 | 5.716192  | -0.325185 |
| Mg | 1.896247  | -5.716022 | 0.341029  |
| Mg | -4.272889 | -4.187837 | 0.739097  |
| Mg | 5.239341  | -0.906824 | 2.840561  |

55

Al55Mg0

|    |           |           |           |
|----|-----------|-----------|-----------|
| Al | -2.018950 | -0.249961 | -4.962733 |
| Al | 0.368508  | 1.178463  | -4.493653 |
| Al | 0.319050  | -1.696537 | -4.328662 |
| Al | 2.740520  | 2.557472  | -3.836170 |
| Al | 2.749766  | -0.262739 | -3.753321 |
| Al | -2.153494 | 2.169534  | -3.517561 |
| Al | 2.643668  | -3.071944 | -3.513077 |
| Al | -2.233532 | -2.482332 | -3.250653 |
| Al | 0.277214  | 3.603314  | -2.942191 |
| Al | -3.761620 | -0.093031 | -2.749347 |
| Al | 0.147667  | -3.923527 | -2.510309 |
| Al | -1.014740 | -0.125641 | -2.494295 |
| Al | -2.197702 | 4.498048  | -1.924862 |
| Al | 1.377410  | 1.285401  | -1.928072 |
| Al | 1.328731  | -1.543994 | -1.765705 |
| Al | 4.130124  | 1.271502  | -1.744311 |
| Al | 4.080692  | -1.603528 | -1.579337 |
| Al | -2.354490 | -4.610583 | -1.402210 |
| Al | 2.602046  | 3.660810  | -1.243062 |
| Al | -3.852920 | 2.331855  | -1.197897 |
| Al | -1.104585 | 2.260767  | -0.967451 |
| Al | -3.932985 | -2.320025 | -0.930961 |
| Al | 2.472510  | -3.866075 | -0.811116 |
| Al | -1.183378 | -2.317306 | -0.704761 |
| Al | -5.346508 | 0.067885  | -0.420648 |
| Al | 0.080093  | 4.651858  | -0.266953 |
| Al | -2.687232 | 0.034110  | -0.211428 |
| Al | -0.000001 | -0.000000 | 0.000002  |
| Al | 2.687233  | -0.034108 | 0.211428  |
| Al | -0.080095 | -4.651857 | 0.266954  |
| Al | 5.346508  | -0.067880 | 0.420647  |
| Al | 1.183376  | 2.317307  | 0.704761  |
| Al | -2.472510 | 3.866074  | 0.811118  |
| Al | 3.932983  | 2.320030  | 0.930958  |
| Al | 1.104586  | -2.260766 | 0.967451  |
| Al | 3.852921  | -2.331852 | 1.197897  |
| Al | -2.602049 | -3.660810 | 1.243061  |
| Al | 2.354486  | 4.610585  | 1.402209  |
| Al | -4.080693 | 1.603527  | 1.579339  |
| Al | -4.130124 | -1.271502 | 1.744309  |
| Al | -1.328731 | 1.543991  | 1.765706  |
| Al | -1.377408 | -1.285401 | 1.928070  |
| Al | 2.197704  | -4.498047 | 1.924863  |
| Al | 1.014740  | 0.125641  | 2.494293  |
| Al | -0.147669 | 3.923525  | 2.510311  |
| Al | 3.761622  | 0.093037  | 2.749346  |
| Al | -0.277212 | -3.603315 | 2.942191  |
| Al | 2.233530  | 2.482334  | 3.250653  |

|    |           |           |          |
|----|-----------|-----------|----------|
| Al | -2.643670 | 3.071939  | 3.513081 |
| Al | 2.153498  | -2.169532 | 3.517560 |
| Al | -2.749766 | 0.262734  | 3.753322 |
| Al | -2.740520 | -2.557476 | 3.836169 |
| Al | -0.319051 | 1.696533  | 4.328664 |
| Al | -0.368506 | -1.178467 | 4.493651 |
| Al | 2.018952  | 0.249962  | 4.962732 |

## **Part II**

Structures obtained at the DFT level

|        |               |               |               |  |
|--------|---------------|---------------|---------------|--|
| 2      |               |               |               |  |
| Al0Mg2 |               |               |               |  |
| MG     | 0.8599225039  | -1.7786071045 | 0.1016409077  |  |
| MG     | -0.8604228474 | 1.7784989795  | 0.0343163745  |  |
| 2      |               |               |               |  |
| Al1Mg1 |               |               |               |  |
| AL     | -0.7111095475 | -0.5398572185 | 1.2139130450  |  |
| MG     | 0.7265915177  | 0.5275802870  | -1.2138692326 |  |
| 2      |               |               |               |  |
| Al2Mg0 |               |               |               |  |
| AL     | -0.1100825396 | -0.6320822853 | -1.1568678791 |  |
| AL     | 0.1065805160  | 0.6321790073  | 1.1569648703  |  |
| 3      |               |               |               |  |
| Al0Mg3 |               |               |               |  |
| MG     | -1.1104694209 | 1.2087048839  | -1.1357835435 |  |
| MG     | -0.2133808075 | -1.9794888345 | -0.1443144536 |  |
| MG     | 1.3238502285  | 0.7707839506  | 1.2800989971  |  |
| 3      |               |               |               |  |
| Al1Mg2 |               |               |               |  |
| AL     | 0.9043061670  | 0.3264294126  | 1.2282789151  |  |
| MG     | -0.9685108416 | -1.5136056515 | 0.1248925681  |  |
| MG     | 0.0642046746  | 1.1871752389  | -1.3531714832 |  |
| 3      |               |               |               |  |
| Al2Mg1 |               |               |               |  |
| AL     | -0.3928004618 | 1.3936109752  | 0.4634562126  |  |
| AL     | -0.6723724022 | -1.1066674775 | 0.7965664840  |  |
| MG     | 1.0651728641  | -0.2869434977 | -1.2600226966 |  |
| 3      |               |               |               |  |
| Al3Mg0 |               |               |               |  |
| AL     | -0.7572056588 | -0.7226540010 | -1.1061156076 |  |
| AL     | 1.2246858157  | 0.8395744350  | -0.3384740809 |  |
| AL     | -0.4674801569 | -0.1169214340 | 1.4445896885  |  |
| 4      |               |               |               |  |
| Al0Mg4 |               |               |               |  |
| MG     | 0.0831167812  | -0.3630203897 | -1.8888278497 |  |
| MG     | 0.2041700125  | 1.8911263001  | 0.2997666277  |  |
| MG     | -1.7014325523 | -0.5799794861 | 0.6904682691  |  |
| MG     | 1.4141457587  | -0.9481274243 | 0.8985929528  |  |
| 4      |               |               |               |  |
| Al1Mg3 |               |               |               |  |
| AL     | 0.3155382672  | -1.4632489145 | -0.8090724165 |  |
| MG     | -1.4350765743 | 0.8310605550  | -0.8694057230 |  |
| MG     | -0.4304666702 | -0.4146877465 | 1.7742863590  |  |
| MG     | 1.5500049774  | 1.0468761061  | -0.0958082195 |  |
| 4      |               |               |               |  |
| Al2Mg2 |               |               |               |  |
| AL     | -1.6295888992 | -0.0087429578 | 0.4688320350  |  |
| AL     | 0.6017560177  | -1.5822722029 | 0.1253467512  |  |
| MG     | 0.0909642976  | 0.5196315977  | -1.7691527361 |  |
| MG     | 0.9368675840  | 1.0713825629  | 1.1749729499  |  |
| 4      |               |               |               |  |
| Al3Mg1 |               |               |               |  |
| AL     | -1.5296248467 | -0.3580359140 | -0.6463243220 |  |
| AL     | -0.0929615767 | 1.6607154421  | 0.3498323748  |  |
| AL     | 1.0292514132  | -0.0631617987 | -1.3531421362 |  |
| MG     | 0.5933350102  | -1.2395177294 | 1.6496340834  |  |
| 4      |               |               |               |  |
| Al4Mg0 |               |               |               |  |
| AL     | -1.9292468466 | -0.5640098450 | 0.1202725509  |  |
| AL     | -0.1251698454 | 0.0001744833  | -2.0098762978 |  |
| AL     | 0.1253164013  | -0.0007715081 | 2.0095822945  |  |
| AL     | 1.9290992907  | 0.5646068698  | -0.1199785476 |  |
| 5      |               |               |               |  |
| Al0Mg5 |               |               |               |  |
| MG     | 1.0170249012  | -0.5812156449 | -1.3265082244 |  |
| MG     | -2.4118043017 | -0.8713305137 | -1.4669305755 |  |
| MG     | -0.5971813685 | 1.6654474203  | -0.0070870135 |  |
| MG     | 2.4113601800  | 0.8722837370  | 1.4663625961  |  |
| MG     | -0.4194004110 | -1.0851849987 | 1.3341632173  |  |
| 5      |               |               |               |  |
| Al1Mg4 |               |               |               |  |
| AL     | -0.0283166716 | 0.3393959604  | -1.3369075855 |  |
| MG     | 2.7766253392  | -0.4187844119 | -0.5862173966 |  |
| MG     | -2.7869554585 | 0.6119342624  | -0.1867817478 |  |

|        |               |               |               |
|--------|---------------|---------------|---------------|
| MG     | -0.2728336424 | -1.7184904665 | 0.6930905142  |
| MG     | 0.3114814332  | 1.1859446555  | 1.4168162156  |
| 5      |               |               |               |
| Al2Mg3 |               |               |               |
| AL     | -1.5323163771 | -0.3603944034 | -0.6721499555 |
| AL     | 1.0028210747  | 0.0167660754  | 0.9802928188  |
| MG     | -2.0310392404 | -1.4697464200 | 1.9707754970  |
| MG     | 0.7602468158  | 2.2344923921  | -0.6461413302 |
| MG     | 1.8002877271  | -0.4211186440 | -1.6327780301 |
| 5      |               |               |               |
| Al3Mg2 |               |               |               |
| AL     | 0.0217196703  | -1.7004797617 | -0.4982712870 |
| AL     | 1.1663646779  | 0.7720663262  | -0.8391390043 |
| AL     | -0.7056702090 | -0.8312149521 | 2.0416574976  |
| MG     | -0.9107495087 | -0.0650798869 | -2.5158862874 |
| MG     | 0.4283343695  | 1.8247082745  | 1.8116390811  |
| 5      |               |               |               |
| Al4Mg1 |               |               |               |
| AL     | -0.6332510750 | -1.1793948171 | -1.4825892723 |
| AL     | -0.3683912031 | 1.5227460505  | -0.9299694423 |
| AL     | 1.4514300571  | -1.6463094222 | 0.2563022900  |
| AL     | 1.3376418195  | 0.9512723750  | 1.1690331728  |
| MG     | -1.7874295985 | 0.3516848138  | 0.9872232519  |
| 5      |               |               |               |
| Al5Mg0 |               |               |               |
| AL     | -1.7667672835 | 1.6564506068  | -1.2445628279 |
| AL     | 0.8997328802  | -2.5711267571 | -0.0548463110 |
| AL     | -0.5534817858 | -0.5819005552 | -0.8241857523 |
| AL     | 1.3679403935  | -0.2953197879 | 1.3544006487  |
| AL     | 0.0525747957  | 1.7918964933  | 0.7691942424  |
| 6      |               |               |               |
| Al0Mg6 |               |               |               |
| MG     | -2.2761950063 | 0.0002604191  | -1.9132039217 |
| MG     | 0.8725539445  | 0.6677002457  | -1.0121958545 |
| MG     | 1.6199614415  | -2.4883372468 | -0.1943940129 |
| MG     | -1.6788115329 | 2.4988839287  | 0.1511587678  |
| MG     | -0.8602040616 | -0.6219883551 | 1.0487730159  |
| MG     | 2.3226942148  | -0.0565189916 | 1.9198620053  |
| 6      |               |               |               |
| Al1Mg5 |               |               |               |
| AL     | -0.2897372777 | 0.1886853374  | 0.0165249049  |
| MG     | 1.6478097139  | -0.0242776704 | -2.2023120407 |
| MG     | 0.0256454260  | -2.4991974261 | -1.1730001196 |
| MG     | -0.9153767401 | 3.0784142023  | 0.8637704741  |
| MG     | 2.1881379256  | -1.2224913069 | 0.5421391216  |
| MG     | -2.6564780477 | 0.4788658637  | 1.9528776597  |
| 6      |               |               |               |
| Al2Mg4 |               |               |               |
| AL     | 0.3930584664  | -1.6123133783 | -0.9219618618 |
| AL     | -0.5792874331 | 1.5335022809  | -0.7329392440 |
| MG     | 0.1324718551  | 0.2022259135  | -3.0767933122 |
| MG     | 1.6308376246  | 0.1400106951  | 1.0154807750  |
| MG     | -1.0253172279 | 1.4118808255  | 1.9925382081  |
| MG     | -0.5517632851 | -1.6753063367 | 1.7236754350  |
| 6      |               |               |               |
| Al3Mg3 |               |               |               |
| AL     | -0.6052904228 | -0.5776811600 | -1.2750498892 |
| AL     | 1.5321519712  | -0.5657976452 | 0.6186216648  |
| AL     | -0.7949302871 | 1.0753768540  | 0.7217538783  |
| MG     | 1.6225225721  | -2.2591258576 | -1.5170552227 |
| MG     | -2.9711068876 | 1.1226161075  | -1.2169089158 |
| MG     | 1.2166530542  | 1.2046117012  | 2.6686374846  |
| 6      |               |               |               |
| Al4Mg2 |               |               |               |
| AL     | 1.0740294266  | 0.2103723920  | -1.7499087870 |
| AL     | -1.1766444112 | 1.4414097376  | -0.8921686253 |
| AL     | 1.8996556136  | -0.0615877332 | 0.8054647873  |
| AL     | -0.3525003985 | 1.1701278188  | 1.6616091688  |
| MG     | 1.3119534186  | -2.4923849905 | -0.6874496787 |
| MG     | -2.7564946491 | -0.2679372246 | 0.8624541349  |
| 6      |               |               |               |
| Al5Mg1 |               |               |               |
| AL     | -1.6030178530 | -1.3490115589 | 0.4448727533  |
| AL     | -1.1170496518 | 1.1525214021  | -0.3740667765 |

|        |               |               |               |
|--------|---------------|---------------|---------------|
| AL     | 0.4214912202  | -0.9601156285 | 2.2490469643  |
| AL     | -0.2801614051 | -1.3681515019 | -1.8987128872 |
| AL     | 0.9696574418  | 1.4696165896  | 1.1528337630  |
| MG     | 1.6090792478  | 1.0551406976  | -1.5739728169 |
| 6      |               |               |               |
| Al6Mg0 |               |               |               |
| AL     | -0.5467659909 | 0.4443340969  | -1.6605639131 |
| AL     | 1.9619440000  | -0.0786949179 | -0.5423286156 |
| AL     | -0.8412308369 | 2.5039215908  | 0.0199489810  |
| AL     | -1.6997564977 | -0.7853320402 | 0.4139414800  |
| AL     | 1.5966495952  | 2.0236608797  | 1.0810121336  |
| AL     | 0.7238282601  | -1.3210371292 | 1.4878839940  |
| 7      |               |               |               |
| Al0Mg7 |               |               |               |
| MG     | 0.3201581939  | 0.4935728910  | -3.1225374969 |
| MG     | 0.1450700544  | -1.1730748769 | -0.4120513582 |
| MG     | 2.9047790715  | 0.1427717910  | -1.2996057181 |
| MG     | -1.1936687879 | 1.1723287163  | 1.8716453081  |
| MG     | 0.7806230809  | 2.2894255515  | -0.6470405592 |
| MG     | -2.7642056115 | -1.3004790159 | 0.8830161211  |
| MG     | -0.1927560013 | -1.6245450571 | 2.7265727032  |
| 7      |               |               |               |
| Al1Mg6 |               |               |               |
| AL     | -0.0026764269 | 0.0036002294  | 0.0069586084  |
| MG     | -2.9210549348 | 0.0340813178  | 0.7709444091  |
| MG     | -2.0111758019 | -1.0479535383 | -1.9897371228 |
| MG     | -1.3489291248 | -2.6365956828 | 0.5945001675  |
| MG     | 1.3532790966  | 2.6327705072  | -0.6016046580 |
| MG     | 2.0154312185  | 1.0589176819  | 1.9880084387  |
| MG     | 2.9151259734  | -0.0448205153 | -0.7690708429 |
| 7      |               |               |               |
| Al2Mg5 |               |               |               |
| AL     | 1.7404231208  | -0.3645961153 | -0.8514271774 |
| AL     | -1.8254915159 | 0.7593497944  | -0.1040603146 |
| MG     | -0.1948436921 | 0.9991151612  | -2.3855531574 |
| MG     | -1.7353313372 | -1.8225622873 | -1.0611128005 |
| MG     | 1.7339406677  | 2.1296511793  | 0.3254590044  |
| MG     | -1.3473315517 | -0.8457524696 | 2.1596812856  |
| MG     | 1.6286333085  | -0.8552052627 | 1.9170131600  |
| 7      |               |               |               |
| Al3Mg4 |               |               |               |
| AL     | -0.8057397325 | -1.6994610553 | 0.8871248399  |
| AL     | -0.2745105459 | -0.5431063922 | -1.5985932074 |
| AL     | 2.0941191284  | -0.8862834930 | -0.5624100877 |
| MG     | -2.4524963004 | 0.4228326612  | -0.0233224422 |
| MG     | -1.3864359299 | 3.2699662511  | 0.2830732276  |
| MG     | 1.7309173750  | -2.3788013400 | 1.8650757892  |
| MG     | 1.0941470052  | 1.8148523683  | -0.8509481194 |
| 7      |               |               |               |
| Al4Mg3 |               |               |               |
| AL     | -1.8513157014 | -0.8546559149 | 0.0909573322  |
| AL     | -0.5406845720 | 1.3457236980  | -0.9655279764 |
| AL     | 0.3589896731  | -1.3222028855 | 1.7212029932  |
| AL     | 1.4805562399  | 1.0853636184  | 0.9056958525  |
| MG     | -1.1809378732 | 1.1365298803  | 2.0907738005  |
| MG     | -0.4660911143 | -1.4527855704 | -2.2570399636 |
| MG     | 2.1994833480  | 0.0620281741  | -1.5860620384 |
| 7      |               |               |               |
| Al5Mg2 |               |               |               |
| AL     | -1.6049293943 | 0.8937121034  | -1.4891310440 |
| AL     | 0.9560930555  | 1.5645609612  | -0.8710184440 |
| AL     | -0.3321958500 | -2.1670517456 | 0.6028001426  |
| AL     | -1.8096899192 | 0.0205267579  | 1.0857184210  |
| AL     | 0.3599797178  | 1.5148209837  | 1.7812310100  |
| MG     | 0.3524122347  | -1.1823255966 | -2.0030253979 |
| MG     | 2.0783301556  | -0.6442434641 | 0.8934253123  |
| 7      |               |               |               |
| Al6Mg1 |               |               |               |
| AL     | 1.4847856703  | 0.8756441601  | -1.1732400211 |
| AL     | -1.7226746767 | -1.1446724297 | -0.9958150857 |
| AL     | 0.8647604882  | -1.7588954215 | -1.1918514424 |
| AL     | -1.0827804897 | 1.4865050160  | -0.9845048487 |
| AL     | 1.2367438763  | -0.9701742739 | 1.3718671581  |
| AL     | -1.3314788058 | -0.3577903446 | 1.5717047091  |



MG 0.5506439372 1.8693832936 1.4018405307

7

Al7Mg0

AL -1.6496250022 -0.0538859314 -1.7656134213  
AL 0.4665484715 1.6099748139 -1.1027138580  
AL 0.9092785007 -1.0695712437 -1.4325515489  
AL -1.9965768267 -0.4265576881 0.8952998018  
AL 2.2171159387 0.2328933371 0.9708492013  
AL -0.2359958796 1.5198336469 1.4239084016  
AL 0.2892537975 -1.8126869346 1.0108204236

8

Al0Mg8

MG -1.0524848802 -1.6124858793 -0.1146272671  
MG 1.3586262494 -2.3434392316 -1.9274494570  
MG 1.4825632751 3.1128080824 0.2806455946  
MG -0.9557193748 1.7320342310 -1.2788609751  
MG 1.5177860282 -2.7001194721 1.2336549903  
MG -3.4367299837 0.3154248641 0.1778605791  
MG 1.9221619608 0.0828082504 -0.0732830289  
MG -0.8362032747 1.4129691552 1.7020605641

8

Al1Mg7

AL -1.1424533479 -1.1988953061 -1.6833466041  
MG -0.6885748311 1.6957109804 -1.5205540367  
MG 1.7586616498 -0.9425985450 -1.3004568974  
MG 1.9897952921 1.8419747309 -0.0100645473  
MG -2.6965054261 0.0170276450 0.3565481717  
MG -0.2337412308 -2.6488566382 0.5828700872  
MG -0.5788871178 1.7937328268 1.6862576909  
MG 1.5917050118 -0.5580956938 1.8887461356

8

Al2Mg6

AL 1.3791816023 1.0771124844 -1.1698687274  
AL -0.7586482912 -1.8604434928 -0.6570024427  
MG -1.2423225890 0.5075731784 -2.2485107595  
MG 2.0912475647 -1.5610010773 -0.2278179523  
MG -2.5111370087 0.0182384694 0.5310515021  
MG 1.7754613223 0.8955970260 1.6248671995  
MG -0.0033777807 -1.5448235214 2.0506455969  
MG -0.7304058197 2.4677469333 0.0966345834

8

Al3Mg5

AL -1.7277878364 -0.9928076611 -0.6344592379  
AL -0.4824476390 -0.7680604424 1.8589942895  
AL 1.3506713492 -0.2019234456 -1.4612305567  
MG -1.9476415705 1.5114516722 0.8769995573  
MG -0.9497332019 1.4275189616 -1.9812561708  
MG 0.4952391893 -2.6376639246 -0.1254559528  
MG 0.9629636667 2.1200237292 0.2656804116  
MG 2.2987360424 -0.4585378894 1.2007276598

8

Al4Mg4

AL -1.3960653624 1.3328316065 -0.4902144161  
AL -1.2691776557 -1.3693964416 0.6775091878  
AL 1.3543181874 1.3442229381 0.5650883756  
AL 1.3077296431 -1.2935563761 -0.7518509388  
MG -1.2224664083 -1.0549622108 -2.0842499630  
MG -0.9527179939 1.0119229088 2.2407938010  
MG 1.2556223528 -1.1345779839 2.0216542664  
MG 0.9227572370 1.1635165591 -2.1787303128

8

Al5Mg3

AL -1.2758050856 -0.6317236270 -1.3219269571  
AL 0.2956862768 1.7237216868 -0.8512584573  
AL 2.5532816039 0.4881221537 0.3862314320  
AL 0.7775063831 -1.7509618198 0.3443287862  
AL 0.2281573831 0.6431531515 1.7750388172  
MG 1.3600354574 -0.5667646904 -2.1902824130  
MG -2.1684606428 1.4698269501 0.4378371085  
MG -1.7704023761 -1.3753728049 1.4200316836

8

Al6Mg2

AL -1.8360970060 -0.4590835272 -0.6326723054  
AL -0.6537261577 -2.2485089762 0.9270705959

|    |               |               |               |
|----|---------------|---------------|---------------|
| AL | -0.1733918639 | 1.8191409733  | 0.7571797058  |
| AL | 0.5321622655  | 0.5110126856  | -1.4893367929 |
| AL | 0.9926253407  | 0.0112478022  | 2.3037749037  |
| AL | 1.7313464554  | -1.2994020469 | 0.0427317444  |
| MG | -1.9217470611 | 0.0321144428  | 2.2362218764  |
| MG | 1.3288280270  | 1.6334796463  | -4.1449697280 |

8

|        |               |               |               |
|--------|---------------|---------------|---------------|
| Al7Mg1 |               |               |               |
| AL     | -1.8415107745 | 1.1329873887  | -0.9694032691 |
| AL     | -0.6949563312 | -1.3310310363 | -1.1977668169 |
| AL     | 0.6810531642  | 1.2865271250  | -1.8436624678 |
| AL     | -1.1841624682 | 1.8848948322  | 1.5522536684  |
| AL     | -0.2881646164 | -0.6369975744 | 1.3812589875  |
| AL     | -0.1251367967 | -3.4753283111 | 0.5150172913  |
| AL     | 1.3465034737  | 1.8484545891  | 0.7732205790  |
| MG     | 2.1063743492  | -0.7095080132 | -0.2109179724 |

8

|        |               |               |               |
|--------|---------------|---------------|---------------|
| Al8Mg0 |               |               |               |
| AL     | 1.5126988079  | -1.3172188939 | -1.7196666204 |
| AL     | -0.7196530616 | 0.3731971215  | -1.7943511136 |
| AL     | 1.6344194580  | 1.0692899897  | -0.2511738975 |
| AL     | -1.6328976431 | -1.0704645735 | 0.2505964287  |
| AL     | -0.6608862539 | 2.8446332514  | -0.2881172007 |
| AL     | 0.6585077182  | -2.8423807039 | 0.2883853038  |
| AL     | -1.5143977903 | 1.3153108417  | 1.7181454748  |
| AL     | 0.7222077649  | -0.3723680331 | 1.7961806250  |

9

|        |               |               |               |
|--------|---------------|---------------|---------------|
| Al0Mg9 |               |               |               |
| MG     | 1.3154338291  | 0.1899598306  | -2.0725714466 |
| MG     | -1.1748747015 | 1.9796083801  | -1.8907368693 |
| MG     | -1.6446389814 | -1.0289283323 | -1.5066232513 |
| MG     | 0.9073522360  | -2.6594954481 | -0.9974602893 |
| MG     | 0.9226350361  | 2.2585154463  | 0.3344602769  |
| MG     | -2.0486334995 | 1.0362250432  | 0.9015090066  |
| MG     | 2.2077705473  | -0.6180426814 | 0.8895572349  |
| MG     | -0.7526299687 | -1.8382774691 | 1.4553548680  |
| MG     | 0.2675855027  | 0.6804342308  | 2.8865104701  |

|        |               |               |               |
|--------|---------------|---------------|---------------|
| Al1Mg8 |               |               |               |
| AL     | -0.1318377955 | 2.5413414984  | 0.3600994294  |
| MG     | -2.3220422171 | 0.8228720484  | -0.2606994761 |
| MG     | -1.2865108113 | -1.8867922460 | 0.6531958873  |
| MG     | -1.3578848617 | -1.1305565326 | -2.3358946519 |
| MG     | -0.5810641309 | 0.5467030811  | 2.3505465217  |
| MG     | 0.4872464636  | 1.2362687549  | -2.0983568758 |
| MG     | 1.4970950214  | -1.5937998140 | 1.9470821473  |
| MG     | 1.4634677752  | -1.4861839414 | -1.1372078818 |
| MG     | 2.2315285564  | 0.9501481511  | 0.5212348999  |

|        |               |               |               |
|--------|---------------|---------------|---------------|
| Al2Mg7 |               |               |               |
| AL     | 0.1164324096  | -1.8283973637 | 0.8195780634  |
| AL     | 0.3230059355  | 1.8532324391  | 0.7038301846  |
| MG     | 0.6377454537  | 1.0450203187  | -2.0562471141 |
| MG     | -1.6395800838 | -1.1123738900 | -1.3550479979 |
| MG     | 1.3361724609  | -1.8177091696 | -1.7507417450 |
| MG     | -2.0811707745 | 1.7754471825  | -0.8260261445 |
| MG     | 2.4950747428  | 0.1490900408  | 0.1829575245  |
| MG     | -1.9990158667 | -0.1025205716 | 1.4953813284  |
| MG     | 0.8113357226  | 0.0382110138  | 2.7863149006  |

|        |               |               |               |
|--------|---------------|---------------|---------------|
| Al3Mg6 |               |               |               |
| AL     | -1.2113165170 | -0.4260031738 | 1.7667909237  |
| AL     | -0.2615107583 | -0.0416593162 | -1.8034843053 |
| AL     | 1.4536156492  | -0.6175897281 | 1.0164026750  |
| MG     | -2.7108537944 | -0.7146211000 | -0.5656088859 |
| MG     | -1.4219265165 | 2.0250097833  | -0.1697527496 |
| MG     | -0.2502967582 | -2.4689540617 | -0.0851836702 |
| MG     | 1.5331577752  | 1.7978879546  | -0.6775208707 |
| MG     | 0.4267213613  | 1.8415013902  | 2.1466015204  |
| MG     | 2.4424085588  | -1.3955727482 | -1.6282446373 |

|        |               |               |               |
|--------|---------------|---------------|---------------|
| Al4Mg5 |               |               |               |
| AL     | -0.5298238254 | -0.2619848345 | 1.8209316920  |
| AL     | -0.0449680205 | -0.2703518596 | -1.9058568022 |
| AL     | -0.2107580021 | -2.5545671635 | 0.0010375460  |
| AL     | 1.7214801891  | 0.6785234395  | 0.1980824976  |
| MG     | -0.7938311652 | 1.8588610644  | -0.1040931442 |
| MG     | -2.3610692184 | -0.8229549667 | -0.3170527986 |
| MG     | -1.8603041714 | 4.8226101338  | -0.2242878751 |
| MG     | 1.8593658611  | -1.6934244371 | 1.7942978355  |
| MG     | 2.2199083528  | -1.7567103762 | -1.2630599511 |

|        |               |               |               |
|--------|---------------|---------------|---------------|
| Al5Mg4 |               |               |               |
| AL     | -1.3751181058 | 1.0100187941  | 1.1783056080  |
| AL     | -0.9605077862 | 0.5107655037  | -1.4924117284 |
| AL     | 0.7997836603  | -0.6336060681 | 1.5437434832  |
| AL     | 1.8022620983  | 1.0120958260  | -0.6579934562 |
| AL     | 0.9424630655  | -1.4692928239 | -1.0922295105 |
| MG     | -1.7494634789 | -1.6536692776 | 0.3779478471  |
| MG     | -0.1557429744 | 3.0667991125  | -0.5684505524 |
| MG     | -0.5502053170 | -3.9882114271 | -1.1818596538 |
| MG     | 1.2465298382  | 2.1451013604  | 1.8929469630  |

|        |               |               |               |
|--------|---------------|---------------|---------------|
| Al6Mg3 |               |               |               |
| AL     | -1.7669642213 | 1.0251862492  | 0.2267101218  |
| AL     | -0.9043711658 | -1.4957603670 | -0.5104113975 |
| AL     | 1.1127863862  | 0.2078463198  | -1.8386477549 |
| AL     | 0.8955365849  | 1.2930075713  | 0.9171737154  |
| AL     | 1.4222108019  | -2.2445881677 | 2.6197191729  |
| AL     | 1.8037757931  | -1.2613302053 | 0.1899277292  |
| MG     | -1.6017790575 | 0.3824510938  | -2.5512505186 |
| MG     | -0.8759215278 | -0.6156425648 | 2.3091367276  |
| MG     | -0.0852725938 | 2.7088290706  | -1.3623587958 |

|        |               |               |               |
|--------|---------------|---------------|---------------|
| Al7Mg2 |               |               |               |
| AL     | -1.6282333484 | 0.6427889219  | 0.2399842232  |
| AL     | -1.6631574493 | -1.6245350965 | -2.7216794938 |
| AL     | -1.0751210688 | -2.0654381015 | -0.1390030264 |
| AL     | -0.3628215372 | 0.7276174228  | -2.3488369189 |
| AL     | 0.1245489842  | -1.0361673004 | 2.0500714498  |
| AL     | 0.8837328564  | 1.9415049500  | -0.2891609306 |
| AL     | 1.3819258118  | -0.8632878268 | -0.6878319406 |
| MG     | -0.1492381570 | 1.7920772687  | 2.3550053518  |
| MG     | 2.4883639082  | 0.4854387617  | 1.5414512854  |

|        |               |               |               |
|--------|---------------|---------------|---------------|
| Al8Mg1 |               |               |               |
| AL     | 0.0787775553  | 0.7898123906  | -3.2157865547 |
| AL     | 0.4954196830  | -1.4544747907 | -1.8412263100 |
| AL     | -1.6645594126 | 1.2061127855  | -1.2428226993 |
| AL     | 1.5419122116  | 1.4768714051  | -1.0593568983 |
| AL     | 1.7135086726  | -0.7835931320 | 0.4445217335  |
| AL     | -1.3185094838 | -1.0941257017 | 0.1164431202  |
| AL     | -0.2423851941 | 1.6510975573  | 0.9801695604  |
| AL     | 0.8148847363  | 0.0262406892  | 2.8492418704  |
| MG     | -1.4190487683 | -1.8179422032 | 2.9688151178  |

|        |               |               |               |
|--------|---------------|---------------|---------------|
| Al9Mg0 |               |               |               |
| AL     | -2.0038355173 | -0.9430771123 | 2.4656592192  |
| AL     | -1.2171886340 | -0.0702149856 | -0.8792120738 |
| AL     | -1.0075573180 | 1.2933538157  | 1.5426745229  |
| AL     | -0.2750996040 | -2.2903161061 | 1.0063562299  |
| AL     | 0.7280398166  | 1.7114327920  | -1.6963784891 |
| AL     | 0.2698342840  | -2.4217315336 | -1.5412276536 |
| AL     | 2.0301446585  | -0.5309627490 | -1.9767639719 |
| AL     | 0.1682727246  | 3.2929166545  | 0.3319746224  |
| AL     | 1.3073905896  | -0.0414017755 | 0.7469165941  |

|    |               |               |               |
|----|---------------|---------------|---------------|
| MG | 0.4392357751  | -0.0553913684 | -2.6113949971 |
| MG | -0.5881634296 | 2.5817553743  | -1.5103477456 |
| MG | 2.3474229781  | -1.7054336970 | -0.9275587909 |
| MG | -2.3681503696 | 0.1433589647  | -1.1857235297 |
| MG | -0.5948734904 | -2.4492317702 | -0.8294982588 |
| MG | -1.0497163081 | 1.4170421691  | 1.2908855445  |
| MG | 1.8105530654  | 1.2190682340  | -0.1634419305 |
| MG | 0.7581733322  | -1.2192277971 | 1.6510961484  |
| MG | -2.3014864300 | -1.3804690798 | 1.4416120108  |
| MG | 1.5470038768  | 1.4485289704  | 2.8443705489  |

10

Al1Mg9

|    |               |               |               |
|----|---------------|---------------|---------------|
| AL | 0.3738193367  | 1.5535805539  | -0.4835109962 |
| MG | -2.1427964162 | -1.5133903114 | -0.2231693434 |
| MG | -2.4229013291 | 1.3493181981  | -0.9653097438 |
| MG | -1.1402198668 | 0.6675777013  | 1.7884705107  |
| MG | -0.6006669827 | -0.3982037536 | -2.6532089169 |
| MG | -0.2531845288 | -2.1737964096 | 2.1002469121  |
| MG | 0.8173812528  | -2.3779144458 | -0.7596407910 |
| MG | 1.2288928117  | 3.1383780443  | 1.7783231486  |
| MG | 1.8359565910  | -0.2015235590 | 1.2478942229  |
| MG | 2.3037181313  | -0.0440260182 | -1.8300950030 |

10

Al2Mg8

|    |               |               |               |
|----|---------------|---------------|---------------|
| AL | 0.0657708826  | -0.4662377992 | 2.5780372149  |
| AL | -1.6790137282 | 1.0490522492  | 0.5343412603  |
| MG | -2.4505517580 | -1.4197258486 | 1.6902091988  |
| MG | -1.6543691971 | -1.1577093995 | -1.2309762277 |
| MG | 0.8528586960  | 3.4326458895  | -3.6852613090 |
| MG | 0.1535211111  | -2.7159334072 | 0.8466613183  |
| MG | 0.7348221060  | 2.1025349090  | 1.5704343498  |
| MG | 1.2639134195  | -1.6745197827 | -1.7292222005 |
| MG | 0.4486647462  | 1.2193497406  | -1.3431748535 |
| MG | 2.2643837219  | -0.3694555510 | 0.7689522487  |

10

Al3Mg7

|    |               |               |               |
|----|---------------|---------------|---------------|
| AL | 0.2160482471  | -2.0882660674 | -0.8088641919 |
| AL | -0.6003241958 | 1.4831352792  | -0.7619673658 |
| AL | 1.1327368346  | -0.4864891738 | 1.1976400242  |
| MG | 1.0031309354  | 0.1379542070  | -2.7737900626 |
| MG | -1.8929644602 | -0.6506442969 | -1.9760459539 |
| MG | 2.9294865006  | -1.2096626692 | -1.0131517303 |
| MG | 2.1901604128  | 1.6379782460  | -0.4695471962 |
| MG | -2.9307036079 | 0.5566564242  | 3.3835545865  |
| MG | -1.6423824431 | -1.0862511998 | 1.1168274783  |
| MG | -0.4051882234 | 1.7055892506  | 2.1053444118  |

10

Al4Mg6

|    |               |               |               |
|----|---------------|---------------|---------------|
| AL | -2.1636850946 | 0.0362191398  | -0.6261136929 |
| AL | -0.9781494612 | 1.4893721540  | 1.2265316645  |
| AL | -0.2989365047 | -1.2272227080 | 0.9714684266  |
| AL | 1.4197759983  | -0.0913761046 | -1.1528339737 |
| MG | -0.1546227842 | 2.1766503245  | -1.4731519456 |
| MG | -0.1748791447 | -2.4806233176 | -1.6717178191 |
| MG | -2.7641675486 | -1.7836582711 | -2.7104285695 |
| MG | 1.8767728145  | 2.0743744011  | 0.8114488249  |
| MG | 0.7664355654  | 0.6332561891  | 3.2249027673  |
| MG | 2.4714561598  | -0.8269918072 | 1.3998953176  |

10

Al5Mg5

|    |               |               |               |
|----|---------------|---------------|---------------|
| AL | -1.4735037758 | 0.8897997887  | -0.5991329225 |
| AL | -1.1046951779 | 0.5414630256  | 1.9227457663  |
| AL | -0.8159459785 | -1.7723281792 | 0.1725744279  |
| AL | 1.0386562513  | -0.3677935123 | -1.4585718214 |
| AL | 1.8811650192  | -0.9226175439 | 0.9117661656  |
| MG | -2.2368109447 | 1.2118116451  | -3.2980767493 |
| MG | -0.0444286994 | -2.0385575226 | 2.8247527736  |
| MG | 1.3927077622  | 0.6123967957  | 3.2270555590  |
| MG | 1.0903486373  | 1.8778791791  | 0.4527813384  |
| MG | 0.2725059063  | -0.0320536763 | -4.1558945376 |

10

Al6Mg4

|    |               |              |               |
|----|---------------|--------------|---------------|
| AL | 0.6373201904  | 0.3492165678 | -2.6225835905 |
| AL | -1.4066369210 | 0.0288937215 | -0.8892641561 |

|    |               |               |               |
|----|---------------|---------------|---------------|
| AL | 1.0699342070  | 1.2656804075  | -0.1221103134 |
| AL | -0.4713896527 | -2.5017502214 | -0.9587808445 |
| AL | 2.5255994135  | -1.0034074276 | -0.0347412563 |
| AL | 0.1529845687  | -1.0842955120 | 1.2494947384  |
| MG | 1.8764871349  | -2.2025451326 | -2.5238484189 |
| MG | -2.9410220247 | 1.6740350709  | 0.8988007632  |
| MG | -1.2308128402 | 0.4417346283  | 3.2544394196  |
| MG | -0.2124650759 | 3.0324378976  | 1.7485946585  |

10

Al7Mg3

|    |               |               |               |
|----|---------------|---------------|---------------|
| AL | -0.1233536732 | 0.0116418731  | -0.5450350685 |
| AL | -0.7098286321 | -2.0897226382 | 1.3654660716  |
| AL | -1.0882128772 | -0.4830445078 | -3.0605524275 |
| AL | 0.2811847237  | 2.1670787247  | 1.5582216126  |
| AL | 0.6728499894  | 1.5458642772  | -2.8067823762 |
| AL | 0.5928011722  | -0.2585669810 | 2.7881821794  |
| AL | 2.1619119192  | -0.9787624252 | 0.7208315539  |
| MG | -2.0437590515 | 0.5527153402  | 1.5329458340  |
| MG | -1.9761079842 | -2.1974714684 | -1.0769262271 |
| MG | 2.2325154138  | 1.7302688054  | -0.4763501521 |

10

Al8Mg2

|    |               |               |               |
|----|---------------|---------------|---------------|
| AL | 0.8372797230  | -1.9009525691 | -2.4349323076 |
| AL | -1.7563929424 | -1.2916727465 | -1.8368276049 |
| AL | 2.8781192885  | -1.1755471247 | -0.6365046498 |
| AL | 0.2913553750  | -0.4665841452 | -0.1491920436 |
| AL | -1.7988581819 | 1.7292634253  | 1.1709335534  |
| AL | -2.2814723569 | -0.9334826794 | 0.7995452286  |
| AL | 2.3300778483  | 0.0907273661  | 1.6969057164  |
| AL | -0.2130052924 | -0.0852643992 | 2.5463228361  |
| MG | -1.1785213620 | 1.6523956085  | -1.6285820963 |
| MG | 0.8914189006  | 2.3811162642  | 0.4723313677  |

10

Al9Mg1

|    |               |               |               |
|----|---------------|---------------|---------------|
| AL | -1.8002069247 | 1.5794456530  | 0.2872247581  |
| AL | -1.5545951213 | -0.1914044687 | 2.4436302423  |
| AL | -0.1303558334 | -0.6142456821 | 0.0180198574  |
| AL | -0.4188458574 | 1.2200664475  | -2.0416011105 |
| AL | 0.9313529931  | 1.0043496118  | 2.0023308921  |
| AL | -1.3848306495 | -2.6980962174 | 1.2669055244  |
| AL | 1.3109652764  | -0.9453542926 | -2.4155107274 |
| AL | 0.0389717878  | -3.0724862220 | -1.1664786869 |
| AL | 2.3093436468  | 0.6391264102  | -0.3339081005 |
| MG | 0.6982006822  | 3.0785987604  | -0.0606126489 |

10

Al10Mg0

|    |               |               |               |
|----|---------------|---------------|---------------|
| AL | -2.9863134141 | -0.5735428037 | 0.3557229312  |
| AL | -1.5039738899 | -1.0951969243 | -1.7577925693 |
| AL | -1.6539197438 | 0.5714489464  | 2.3162536055  |
| AL | -0.7903755901 | 1.4817364970  | -0.1272944200 |
| AL | 1.1164074354  | -1.9810671247 | -1.1218114130 |
| AL | 0.8560110628  | 1.4354294950  | 2.9521652414  |
| AL | -0.1199772932 | -1.3167518681 | 1.0407736840  |
| AL | 0.4242328917  | 0.9149989456  | -2.3281320309 |
| AL | 1.8590787088  | 0.6691112620  | 0.5360938521  |
| AL | 2.7988298323  | -0.1061664253 | -1.8659788810 |

Al0Mg11

|    |               |               |               |
|----|---------------|---------------|---------------|
| MG | -0.5615850972 | 1.4137515900  | -2.5028897616 |
| MG | -1.1108905586 | -1.1599961323 | -1.0416778334 |
| MG | -1.2694974295 | 2.8634131523  | -5.2831081339 |
| MG | 1.7126567296  | 0.3465284974  | -0.8314988801 |
| MG | 1.5098857959  | -2.7164303771 | -0.6735884000 |
| MG | -0.8868942059 | 1.6415888482  | 0.4876871551  |
| MG | -2.7459638193 | -0.5877934662 | 1.4917357633  |
| MG | -0.2884784821 | 0.1300078049  | 3.1109417253  |
| MG | -0.4994530169 | -2.6286455553 | 1.5990576001  |
| MG | 1.8617655098  | 1.8525106250  | 1.8377909378  |
| MG | 2.2784545741  | -1.1549349869 | 1.8055508274  |

Al1Mg10

|    |              |               |               |
|----|--------------|---------------|---------------|
| AL | 1.9611907958 | -0.8733206095 | 0.3392893155  |
| MG | 0.5555565449 | 0.1715742341  | -1.9592373073 |
| MG | 0.0727243732 | -2.6740977693 | -0.8172922127 |

|    |               |               |               |
|----|---------------|---------------|---------------|
| MG | -2.3194227535 | -0.5719977339 | -1.5127135116 |
| MG | -1.2257297331 | 2.2514774267  | -0.7306851838 |
| MG | 1.7508968698  | 3.2837237872  | -0.9407670439 |
| MG | 3.7704820750  | 1.2371420470  | -0.2457620863 |
| MG | -2.5331885399 | -2.6353617614 | 0.7142173822  |
| MG | -2.4265746232 | 0.3237154508  | 1.4164127605  |
| MG | 0.4292599251  | 1.2488183458  | 1.5627237662  |
| MG | -0.0351959341 | -1.7616724175 | 2.1738131212  |

#### Al2Mg9

|    |               |               |               |
|----|---------------|---------------|---------------|
| AL | -0.4089250470 | -2.1829176356 | -0.9804585598 |
| AL | -0.5678089955 | 1.4180099519  | 0.1258138999  |
| MG | -2.3139985529 | -0.7742208901 | 0.4618154844  |
| MG | -1.7370112561 | 0.6369118547  | -2.2987320993 |
| MG | -1.0054797927 | 2.4661618873  | 2.8751917194  |
| MG | 0.3602225099  | -1.0948976259 | -3.4818282160 |
| MG | 0.5072506691  | -1.4129869034 | 1.5661566902  |
| MG | -0.4447752997 | -0.2111642676 | 4.2037808928  |
| MG | 1.1560485985  | 1.4472267710  | -2.1826475579 |
| MG | 2.1824923566  | 1.0363012424  | 0.7035519371  |
| MG | 2.2719838098  | -1.3284243847 | -0.9926431909 |

#### Al3Mg8

|    |               |               |               |
|----|---------------|---------------|---------------|
| AL | -1.3343660099 | 0.0092868802  | -1.0308256901 |
| AL | 1.6014261690  | 1.0704890650  | 0.4748119897  |
| AL | -0.0721670450 | -1.5017534177 | 0.7328587715  |
| MG | 1.3771604921  | -0.5058589913 | -1.8909467460 |
| MG | 0.1514033559  | 2.4632664957  | -1.4779067161 |
| MG | 2.3396681928  | -3.2723340846 | -2.5005581364 |
| MG | -2.6923355416 | 2.4644021992  | -0.4710868864 |
| MG | 0.9817105279  | -4.0922465608 | 0.0583579254  |
| MG | -0.5118208162 | 2.7916463849  | 1.5111144540  |
| MG | -2.2596545611 | 0.2489998054  | 1.6592224252  |
| MG | 0.4189752360  | 0.3241032242  | 2.9349576092  |

#### Al4Mg7

|    |               |               |               |
|----|---------------|---------------|---------------|
| AL | -1.6765963584 | 0.4498861226  | 0.5221255983  |
| AL | -1.3087365903 | -2.2462635133 | -2.8185787384 |
| AL | 0.3880310984  | -1.3205110401 | 0.8946995871  |
| AL | 1.5069953579  | 0.3915925816  | -0.9292222148 |
| MG | -2.1971311769 | -2.2922182515 | -0.2129316668 |
| MG | -1.0829640901 | 0.4863317925  | -2.3786451201 |
| MG | -0.4929022699 | 2.2043573853  | 2.6092767557  |
| MG | -0.1522283405 | 2.6542767853  | -0.4568654376 |
| MG | 1.4236252308  | -0.0964053604 | 3.2019918435  |
| MG | 1.2318419720  | -2.3602900313 | -1.7611756289 |
| MG | 2.3600661670  | 2.1292445292  | 1.3293250220  |

#### Al5Mg6

|    |               |               |               |
|----|---------------|---------------|---------------|
| AL | -0.6560507233 | 0.0746259439  | -2.7610635555 |
| AL | 1.0062419825  | 0.5509938969  | -0.1611512809 |
| AL | -0.5448672521 | -2.1290535628 | -1.3644508908 |
| AL | -0.2124817349 | 2.7951093110  | 0.8043905591  |
| AL | 0.3593997866  | -0.4141823665 | 2.3537422138  |
| MG | 2.0791902149  | -1.0763404837 | -2.1932867380 |
| MG | -0.6718975764 | 2.6467166118  | -1.9008055471 |
| MG | -1.9274515554 | 0.1729875407  | -0.0254703121 |
| MG | 1.6842817183  | -2.2224812572 | 0.5240291247  |
| MG | -1.3210098183 | -2.4851372439 | 1.2870906097  |
| MG | 0.2046469581  | 2.0867626098  | 3.4369758170  |

#### Al6Mg5

|    |               |               |               |
|----|---------------|---------------|---------------|
| AL | -3.4568067112 | 0.6314956017  | 1.4816734497  |
| AL | -0.5842663549 | -0.8913922213 | -0.9215989301 |
| AL | -0.7085165675 | 0.7879475421  | 1.5248638542  |
| AL | -2.2136797615 | 2.0554898034  | -0.7150818035 |
| AL | 0.6192835350  | -1.4368389561 | 1.5801462490  |
| AL | 0.2932203993  | 1.7181102327  | -1.3438069144 |
| MG | -3.4096525647 | -0.8287064766 | -0.9076448018 |

|    |              |               |               |
|----|--------------|---------------|---------------|
| MG | 2.5334618628 | 0.1451652789  | -1.7098553419 |
| MG | 1.9526573886 | 1.5331227250  | 1.0195536338  |
| MG | 1.5877502121 | -2.6464042038 | -0.9306335382 |
| MG | 3.3865485620 | -1.0679893261 | 0.9223851433  |

#### Al7Mg4

|    |               |               |               |
|----|---------------|---------------|---------------|
| AL | -1.6968401247 | 1.5788517995  | 1.0532584307  |
| AL | -2.2756778620 | -0.9955992531 | 0.4519894069  |
| AL | -0.5734631917 | -2.5566430483 | 1.7928008639  |
| AL | -0.2630163970 | 2.7761921266  | -1.0022541655 |
| AL | 1.0602291585  | -2.8600753539 | -0.2377649875 |
| AL | 0.4940902784  | -0.2774179509 | -0.0990580056 |
| AL | 2.3157885908  | -1.4067445822 | -2.0429843965 |
| MG | -1.6758233406 | 0.4702668868  | -1.8700398188 |
| MG | -0.1674137638 | -0.0523640992 | 2.8819015235  |
| MG | 1.1807066397  | 2.0932468598  | 1.3573810543  |
| MG | 1.6014200124  | 1.2302876150  | -2.2852299054 |

#### Al8Mg3

|    |               |               |               |
|----|---------------|---------------|---------------|
| AL | -1.9531302312 | -1.6720585744 | -1.5601456186 |
| AL | -2.4980161288 | 0.2453720298  | 0.0757068308  |
| AL | 0.2974823083  | -2.7804752762 | 1.2385804132  |
| AL | 0.8872139040  | 2.6208645339  | 1.3235394428  |
| AL | 0.1595104324  | 0.0904425342  | -1.2201840386 |
| AL | 0.0190557745  | -0.2125318725 | 1.5394977231  |
| AL | 2.6380811310  | -1.0190155914 | -1.3784201258 |
| AL | 2.5181260925  | 0.7664400848  | 0.4733066035  |
| MG | -0.9242202185 | 2.7503313655  | -0.8882184714 |
| MG | -1.7293711841 | 2.0765471775  | 2.0497966283  |
| MG | 0.5852671198  | -2.8659164111 | -1.6534593874 |

#### Al9Mg2

|    |               |               |               |
|----|---------------|---------------|---------------|
| AL | 0.3300499218  | -0.8322930997 | -2.2872744050 |
| AL | 0.2911740478  | 1.7094162696  | -1.6747048313 |
| AL | -1.8294534544 | 2.0865591737  | 0.6971340569  |
| AL | 2.6393387111  | -1.3909795941 | 1.4195303152  |
| AL | 1.3115585231  | -2.5665076662 | -0.5904388789 |
| AL | -1.4005473321 | -2.5994138028 | -0.4030165498 |
| AL | 0.3430836523  | -0.0968526533 | 0.4934708907  |
| AL | 0.7220079399  | 2.9070720524  | 0.5875693726  |
| AL | 2.1915095418  | 1.1841235564  | 2.0312425266  |
| MG | -2.2872322030 | 0.2123105466  | -1.6787822190 |
| MG | -2.3114893483 | -0.6134357824 | 1.4052707220  |

#### Al10Mg1

|    |               |               |               |
|----|---------------|---------------|---------------|
| AL | -2.6120586616 | -0.6163688669 | -0.4516536698 |
| AL | -0.2155070962 | -1.2943522417 | 2.7664825953  |
| AL | -2.1170781533 | 1.6008361675  | 0.8261196910  |
| AL | -0.4656324467 | 0.8705643580  | -2.7186768326 |
| AL | -0.1797439136 | 1.4673376225  | 2.6517172238  |
| AL | -1.1140570065 | -1.7824651017 | -2.2708255827 |
| AL | 0.0531064593  | -0.6116394796 | 0.1734818858  |
| AL | 0.2436236281  | 2.0890097624  | -0.5139312332 |
| AL | 2.8460219258  | -0.6924380360 | -0.0678489929 |
| AL | 2.1042041583  | 1.3884933297  | 1.2964818467  |
| MG | 1.4571201064  | -2.4189775142 | -1.6913479315 |

#### Al11Mg0

|    |               |               |               |
|----|---------------|---------------|---------------|
| AL | -2.3805243941 | 0.2326681000  | 0.6461246416  |
| AL | -1.9484067861 | 0.6146082610  | -1.9346650569 |
| AL | -0.0058491988 | -3.2724172001 | -0.1185602520 |
| AL | -0.6782897406 | -1.8313023035 | 2.1254869798  |
| AL | -0.6029015918 | 0.8935246749  | 2.6250173188  |
| AL | -0.3890625146 | 2.2430888507  | 0.1026072980  |
| AL | 0.6012528018  | 0.9903567991  | -2.6053711147 |
| AL | 0.7508550347  | -1.7849800301 | -2.3382220078 |
| AL | 0.3474351697  | -0.4901904180 | -0.0046612014 |
| AL | 2.0685039546  | 0.8409674507  | 2.0711704021  |
| AL | 2.2369862652  | 1.5636748154  | -0.5689270076 |

## Al0Mg12

|    |               |               |               |
|----|---------------|---------------|---------------|
| MG | -2.6787027438 | -0.2081765896 | -1.3448551495 |
| MG | -2.3899142590 | -0.4784955679 | 1.7447867023  |
| MG | -1.5333726076 | 2.0885131077  | 0.3228352859  |
| MG | -1.8361561333 | -2.9332355698 | -0.0903859782 |
| MG | -0.6907529005 | -2.0867020542 | -2.7494484326 |
| MG | 0.6233851511  | 0.2516811958  | 1.5613648229  |
| MG | 0.3255759166  | 0.5247083435  | -1.5844989403 |
| MG | -0.2144580815 | -2.5355630763 | 2.4256953346  |
| MG | 0.6480189994  | 4.2807090457  | 0.3333187894  |
| MG | 1.2267304805  | -2.2457659740 | -0.3117192895 |
| MG | 3.4475465923  | 3.1965882938  | -0.0300949922 |
| MG | 3.0720985857  | 0.1457398454  | -0.2769971528 |

## Al1Mg11

|    |               |               |               |
|----|---------------|---------------|---------------|
| AL | 0.8856886988  | -1.5237560072 | -0.3630438089 |
| MG | -1.0232711295 | -0.9846266057 | -2.5268343178 |
| MG | 1.1447551846  | 1.0538449281  | -1.6558337697 |
| MG | -1.7548034411 | 1.5302847264  | -1.1254117375 |
| MG | -1.5274266181 | -3.3401334960 | -0.7173694108 |
| MG | 3.4569294802  | -0.3371604982 | -0.1398781785 |
| MG | -3.2473007608 | -1.0851047905 | -0.1613579407 |
| MG | 3.1530889426  | 2.4924025624  | 0.4703165134  |
| MG | 0.3322310326  | 3.0093970058  | 0.6636637383  |
| MG | -1.7081669900 | 0.8991562989  | 1.7664392679  |
| MG | -0.9182027599 | -1.9761005342 | 1.8984219990  |
| MG | 1.2064793606  | 0.2617984103  | 1.8908866454  |

## Al2Mg10

|    |               |               |               |
|----|---------------|---------------|---------------|
| AL | -0.8916977542 | 1.2391711006  | 0.4635116418  |
| AL | 0.3686415574  | -0.9709715613 | -1.2302460398 |
| MG | -3.5358146802 | 0.7576304363  | -0.7295148042 |
| MG | -3.7660039307 | -2.2396259098 | 0.1742756193  |
| MG | -1.0214070330 | -1.5748096497 | 1.2843634320  |
| MG | 0.3642108959  | 1.7446047977  | -2.0160423103 |
| MG | -2.2294788787 | -1.5684787381 | -2.4821968306 |
| MG | 0.6958956642  | 0.5304872226  | 2.6595862587  |
| MG | 1.5568527541  | 2.7303076379  | 0.5796382120  |
| MG | 1.9951317592  | -1.7454430791 | 0.9157465278  |
| MG | 2.9347616612  | 0.3447006990  | -1.2575387785 |
| MG | 3.5289079847  | 0.7524280439  | 1.6384160717  |

## Al3Mg9

|    |               |               |               |
|----|---------------|---------------|---------------|
| AL | -0.2924659972 | 1.1170336093  | 1.3904671405  |
| AL | 0.3331243176  | 1.1576224494  | -1.3278377496 |
| AL | 1.1642818345  | -1.3315591968 | -0.3700846965 |
| MG | -3.4989286935 | -0.9562063892 | -1.5554423781 |
| MG | -2.5607551544 | 1.5295910544  | -0.1264909864 |
| MG | -1.9405828047 | 1.0759360141  | -3.0779475051 |
| MG | -1.5633408368 | -1.4449622966 | 0.7006583327  |
| MG | -0.6793258591 | -1.6172192106 | -2.4039809768 |
| MG | 0.7218592615  | -1.4408156015 | 2.6141658535  |
| MG | 2.1497628741  | 1.2338113741  | 2.8788253082  |
| MG | 2.7347092012  | 1.6290278933  | -0.0637603715 |
| MG | 3.4316628569  | -0.9522606999 | 1.3414280292  |

## Al4Mg8

|    |               |               |               |
|----|---------------|---------------|---------------|
| AL | -0.7441740603 | 1.1759593945  | -1.2772665214 |
| AL | 1.2850345277  | -0.8122537098 | -1.1153049972 |
| AL | -1.5999499393 | -0.5411433312 | 0.8323412173  |
| AL | 1.0587589977  | 0.1805752102  | 1.5446849958  |
| MG | 2.2986467633  | 1.7926464351  | -0.8261454360 |
| MG | -1.6176619754 | -1.3348986659 | -2.1881827052 |
| MG | 0.4292070577  | -3.4516581359 | -1.5053129695 |
| MG | -1.9828443351 | -3.2308123998 | 0.1368191903  |
| MG | 0.0203581454  | 3.7574726079  | -0.4987792279 |
| MG | 1.5328221821  | 2.9264811079  | 1.8643194656  |
| MG | -1.3749568308 | 2.1363237542  | 1.6434275407  |
| MG | 0.6947594669  | -2.5986942673 | 1.3893994475  |



## Al5Mg7

|    |               |               |               |
|----|---------------|---------------|---------------|
| AL | -0.9755811547 | -0.4322923242 | -1.1870279316 |
| AL | 1.1160137731  | 3.1466572917  | -0.1447659171 |
| AL | 0.0798121130  | -3.0174927137 | -0.6482773363 |
| AL | 0.9448976775  | 0.7511711053  | 1.3134291965  |
| AL | 1.9783424492  | 1.0399612507  | -1.4624517611 |
| MG | -0.9454965874 | 3.1101471666  | 1.7217744360  |
| MG | -2.4033242739 | -2.5228205495 | 0.5666792943  |
| MG | -2.1333052303 | 0.3853333187  | 1.4580989530  |
| MG | 1.3134449319  | -1.4882364343 | -2.6187116792 |
| MG | -1.3286704293 | 2.2747267515  | -1.2432907704 |
| MG | 0.0336778799  | -1.8173277154 | 2.0316993313  |
| MG | 2.3201888509  | -1.4298281475 | 0.2128421847  |

## Al6Mg6

|    |               |               |               |
|----|---------------|---------------|---------------|
| AL | 1.4409850262  | 0.0312299704  | -1.9502242402 |
| AL | 0.3526906402  | 2.0634263983  | -0.8237593876 |
| AL | -0.1053442289 | -2.5776016197 | -1.5931739486 |
| AL | 1.4445692405  | -1.6272987666 | 1.1324856876  |
| AL | -0.7153335796 | -0.3695816471 | -0.0735068452 |
| AL | -1.8227425818 | 1.9985861505  | 1.0064191471  |
| MG | -2.8963433643 | -1.9908521550 | -1.3609604630 |
| MG | 2.6348254213  | 0.9326278067  | 0.6548457686  |
| MG | -3.8616640674 | 0.4234224473  | -0.1331977928 |
| MG | 2.6614897356  | -2.3289991788 | -1.2216786964 |
| MG | 0.6793377214  | 3.1005494775  | 1.7824108834  |
| MG | 0.1875310367  | 0.3444911164  | 2.5803398870  |

## Al7Mg5

|    |               |               |               |
|----|---------------|---------------|---------------|
| AL | -1.7695830000 | 2.5947728419  | -1.2401708752 |
| AL | 0.2987170783  | -1.3564537233 | -1.6136216902 |
| AL | 2.5637784589  | -0.0919312641 | -1.9149622676 |
| AL | -2.9517771672 | 1.0325916313  | 0.5164547084  |
| AL | -0.1857297838 | 0.6953381945  | 0.1523853665  |
| AL | -1.8835162347 | -0.6002039522 | 2.3593089006  |
| AL | -0.2773735550 | -2.3237684905 | 1.0126004086  |
| MG | 0.7111935410  | 1.9217967681  | -2.3383442545 |
| MG | -2.3888683753 | -1.4162757850 | -0.7071841162 |
| MG | 2.4334787474  | -1.7008263128 | 0.5312467129  |
| MG | 2.5607658684  | 1.2600610403  | 0.5691872113  |
| MG | 0.8889154221  | -0.0151009482 | 2.6730998955  |

## Al8Mg4

|    |               |               |               |
|----|---------------|---------------|---------------|
| AL | -1.6287197041 | -1.7043534835 | -1.8504698107 |
| AL | -1.7619228619 | 0.9323784718  | -1.6847465254 |
| AL | -1.1259037875 | 0.6820976378  | 2.5963659105  |
| AL | 0.2041781356  | -0.6218876884 | 0.3828744080  |
| AL | 0.6633593012  | -0.1670657949 | -2.8643323261 |
| AL | 1.0804473900  | 1.6009872938  | -0.8561754499 |
| AL | 0.9106931426  | 2.2859757259  | 1.7820555450  |
| AL | 2.4103000493  | -2.2048483515 | 0.6784176039  |
| MG | -2.6111448510 | -0.6911561379 | 0.6769414073  |
| MG | -1.5055437098 | 2.6796876029  | 0.4104277026  |
| MG | 0.8557469428  | -2.8887597176 | -1.4854841337 |
| MG | 2.5085099526  | 0.0969424417  | 2.2141256685  |

## Al9Mg3

|    |               |               |               |
|----|---------------|---------------|---------------|
| AL | -2.1772839713 | -0.2275732400 | 1.8799375799  |
| AL | -1.2654649452 | 0.5376785742  | -2.4926576378 |
| AL | -1.0528382566 | 2.0105995302  | 0.9460053643  |
| AL | -2.6497833674 | -0.7870472834 | -0.6844529611 |
| AL | 0.8347642503  | 0.3671448922  | 2.5665004774  |
| AL | -0.3371851808 | -2.0165544373 | 2.4995984035  |
| AL | 1.5617653495  | 0.8183694890  | -2.1802429702 |
| AL | 0.0815533696  | -0.4755635040 | -0.1331132579 |
| AL | 2.0959470655  | -1.7384856325 | -1.7610071035 |
| MG | 0.9837974482  | -3.1617870887 | 0.3784365060  |
| MG | -0.0966564268 | 2.9798397551  | -1.4706618011 |
| MG | 2.0213856649  | 1.6933789454  | 0.4516574006  |

Al10Mg2

|    |               |               |               |
|----|---------------|---------------|---------------|
| AL | -0.8557683891 | -2.5145082722 | 1.4698582120  |
| AL | -2.4188613515 | 0.3188833655  | -1.0615291061 |
| AL | -2.0554006579 | 1.2731536871  | 1.3621430640  |
| AL | -0.6117077488 | -0.3279852604 | 2.9248848363  |
| AL | 0.3369305870  | 1.8538336662  | -1.7707963782 |
| AL | 0.1409328665  | -0.2340968500 | 0.1267955682  |
| AL | -0.6074152200 | -0.4158484442 | -2.9208667291 |
| AL | 0.3292120625  | 2.7242432288  | 0.7091422544  |
| AL | 1.6089143678  | 0.9555919634  | 2.2811320713  |
| AL | 2.9623412518  | -0.2289229980 | 0.3501487750  |
| MG | -0.8909462471 | -2.6445710885 | -1.2797490118 |
| MG | 2.0617674789  | -0.7597729977 | -2.1911625561 |

Al11Mg1

|    |               |               |               |
|----|---------------|---------------|---------------|
| AL | -0.0484736725 | -1.0622484372 | -2.3342143693 |
| AL | -2.3560968388 | 0.1422523540  | -1.8765382106 |
| AL | 2.4462546565  | -0.9877746014 | -1.4690726226 |
| AL | -1.8746434163 | 2.3121383586  | -0.4282374149 |
| AL | 2.7460011398  | 1.2196208683  | -0.0276464894 |
| AL | 0.0875495353  | 0.3888685837  | 0.0575152031  |
| AL | -1.9351333635 | -1.7406892340 | 0.1180254112  |
| AL | 0.9060404420  | -2.4152778130 | 0.3533394501  |
| AL | -2.4104458170 | 0.6260590469  | 1.5507170540  |
| AL | 2.1529501338  | -0.4674017186 | 1.9357270152  |
| AL | 0.7480058514  | 2.9778442829  | -0.5235975319 |
| MG | -0.4620096507 | -0.9933916901 | 2.6439805050  |

Al12Mg0

|    |               |               |               |
|----|---------------|---------------|---------------|
| AL | -2.4920925130 | 1.0851224301  | 0.5422906923  |
| AL | -0.3480244094 | -3.0106929018 | 0.0860864050  |
| AL | -2.1174727037 | 0.4362156200  | -1.9670364928 |
| AL | -1.1116311672 | 0.4417692784  | 2.6727499551  |
| AL | -0.0370316516 | 2.1822791155  | -1.3954170443 |
| AL | -0.7207044491 | -1.7939546925 | -2.2997342589 |
| AL | -0.0345680559 | -0.3156962283 | 0.0092521320  |
| AL | 0.5311693289  | 2.1881139481  | 1.2719984533  |
| AL | 0.3179499505  | -1.7771869858 | 2.3978575803  |
| AL | 1.1636839826  | 0.0341226295  | -2.6830892804 |
| AL | 2.1789656148  | 0.0596733363  | 1.9516015762  |
| AL | 2.6697540732  | 0.4702344506  | -0.5865607178 |

13  
Al0Mg13

|    |               |               |               |
|----|---------------|---------------|---------------|
| MG | -2.4331447790 | -0.6755819030 | -0.9177391806 |
| MG | -2.5552588605 | 2.3087839574  | -0.1597501191 |
| MG | -0.6605451464 | -0.1101766886 | 1.4968532785  |
| MG | 0.2788280928  | 0.6844039304  | -1.4105496139 |
| MG | -1.3257035557 | -3.0787388718 | 0.5687244879  |
| MG | -1.2059032480 | 3.8673437751  | 2.0516886376  |
| MG | -0.3524772360 | -2.2591385271 | -2.4531492569 |
| MG | 2.3187161764  | -0.4084575280 | 0.6825582001  |
| MG | 1.3438085767  | 2.4127381361  | 1.1005553296  |
| MG | -0.3147025754 | 4.2840218914  | -0.8028792011 |
| MG | 0.8861184891  | -2.4875272141 | 2.4932964191  |
| MG | 2.4355269751  | -1.2000454907 | -2.3137943078 |
| MG | 1.5847360908  | -3.3376254671 | -0.3358146734 |

13  
Al1Mg12

|    |               |               |               |
|----|---------------|---------------|---------------|
| AL | -0.2235993351 | 0.0310236290  | 1.5536917179  |
| MG | -1.4614216802 | -1.2198654527 | -1.9126872242 |
| MG | -0.9515697095 | 1.6792758614  | -1.8984336414 |
| MG | 1.4474965428  | -0.2441878570 | -2.0587058073 |
| MG | -3.5492196909 | 0.6347374223  | -0.5570081996 |
| MG | 3.4278382610  | -2.1120951289 | -0.6253634787 |
| MG | 3.9462798001  | 0.8110929092  | -0.6050168705 |
| MG | 0.5034249114  | -2.4195146095 | 0.1255805530  |
| MG | 1.3046025013  | 2.0977098640  | 0.1482807835  |
| MG | -2.4072094743 | -1.9096088621 | 0.8304731899  |
| MG | -1.6026928165 | 2.6051543851  | 0.8647718437  |

|    |               |               |              |
|----|---------------|---------------|--------------|
| MG | 2.5641961768  | -0.4680686128 | 1.7603908706 |
| MG | -2.9981254869 | 0.5143454522  | 2.3740272632 |

13

Al2Mg11

|    |               |               |               |
|----|---------------|---------------|---------------|
| AL | -0.0649659787 | 0.8709629436  | -0.1339296107 |
| AL | -1.1060830245 | -0.8431450697 | 1.8087540565  |
| MG | 1.0642963004  | 2.5236577862  | -3.8418446538 |
| MG | 0.8177746726  | -0.2073097869 | -2.7768657752 |
| MG | -0.2816303369 | 3.5709719412  | -1.3821921479 |
| MG | -1.1148748938 | -3.4456813007 | 0.7279565445  |
| MG | 1.0108668879  | -2.8647602900 | -1.3262672567 |
| MG | 2.6531141084  | -0.4928903264 | -0.3212292878 |
| MG | -1.6630978815 | -1.1937763727 | -1.1358400806 |
| MG | -1.8045293420 | 3.1053240926  | 1.2080632797  |
| MG | 1.4800624009  | 0.3667782056  | 2.2788419283  |
| MG | 1.5908933373  | -2.5178504288 | 1.6609141451  |
| MG | -2.5818252502 | 1.1277186060  | 3.2336388585  |

13

Al3Mg10

|    |               |               |               |
|----|---------------|---------------|---------------|
| AL | -0.5139416137 | -1.6406101071 | -2.1740447051 |
| AL | 0.0705136395  | 0.5209086677  | -0.4954534984 |
| AL | 0.8423053225  | -1.6192557533 | 1.8959247337  |
| MG | -0.5739590586 | 0.0804297408  | -4.3928793439 |
| MG | 0.1317060687  | 2.4776304916  | -2.7994047072 |
| MG | -2.4546635059 | -0.6758240889 | -0.1491420855 |
| MG | 1.9578038785  | -1.7582531313 | -0.6256005894 |
| MG | -0.5668322473 | -3.4149681651 | -0.0111227325 |
| MG | 1.1317892343  | 3.3785826843  | -0.1095514140 |
| MG | -1.9234726585 | -2.1541114154 | 2.3195395426  |
| MG | -0.9821233157 | 0.7793789807  | 2.1623027168  |
| MG | 2.1811245673  | 0.8370399774  | 1.5596391629  |
| MG | 0.6997496889  | 3.1890511184  | 2.8197939199  |

13

Al4Mg9

|    |               |               |               |
|----|---------------|---------------|---------------|
| AL | 0.7600842166  | 0.2623043008  | -1.1511009045 |
| AL | -1.9701113792 | 0.8453109881  | -0.3790055290 |
| AL | -0.5495375096 | -0.8188508980 | 1.1400689185  |
| AL | 2.0430601542  | 0.4569224356  | 1.2793746869  |
| MG | -0.1860825687 | 2.7036181883  | -1.9608786812 |
| MG | -3.6422053487 | -0.9222722347 | -1.7723578857 |
| MG | 1.5969497115  | -2.4139245033 | -1.7738826048 |
| MG | -1.4879201592 | -2.8212596699 | -1.1718684230 |
| MG | 1.4812870756  | 3.1144149959  | 0.5193321064  |
| MG | 3.2526074369  | -2.0242794169 | 1.1092287250  |
| MG | 0.5988236182  | -3.4628653307 | 0.9438711616  |
| MG | -1.4986326132 | 3.5199078284  | 0.6794970219  |
| MG | -0.3983216345 | 1.5609743164  | 2.5377224078  |

13

Al5Mg8

|    |               |               |               |
|----|---------------|---------------|---------------|
| AL | -1.8175525590 | 0.7831889806  | 2.3015398741  |
| AL | -2.3484511080 | -0.6266945483 | -0.0586290132 |
| AL | -0.7640488431 | -1.6693092360 | 2.0704792198  |
| AL | 0.2793851411  | 0.3294101010  | -0.2879301975 |
| AL | 2.2004046542  | -1.8158981066 | -1.6375203576 |
| MG | -3.0842254639 | 2.0204343271  | -0.2605986036 |
| MG | -0.5084342337 | -2.2558843415 | -1.2702645744 |
| MG | -0.5031863408 | 2.8085635539  | 0.7865938931  |
| MG | 1.4240167774  | 0.4509782856  | -3.1825292361 |
| MG | 1.1134381572  | 0.5918889162  | 2.4483836296  |
| MG | -0.6915241830 | 2.2641464797  | -2.2795748914 |
| MG | 1.5678291446  | -2.7473637099 | 0.9955721633  |
| MG | 3.1323488569  | -0.1334617016 | 0.3744760941  |

13

Al6Mg7

|    |               |               |               |
|----|---------------|---------------|---------------|
| AL | -0.0284041506 | -0.2325868718 | -1.6286839329 |
| AL | -1.0555395993 | 2.4345860621  | -1.1872331847 |
| AL | -2.4821144427 | -1.3771548918 | -0.5822739507 |
| AL | 2.8758088005  | 1.6853223456  | 0.6275942411  |
| AL | 1.1234818585  | -2.8821732285 | 1.3700071653  |
| AL | -1.0964539403 | 0.5656409529  | 1.0358145021  |
| MG | 1.6927377255  | 2.0171002031  | -1.8455576336 |
| MG | -0.1895552744 | -2.9990814893 | -1.0591977881 |
| MG | -3.4951524462 | 1.0447043231  | -1.7153923114 |
| MG | 2.3569750665  | -0.9627667404 | -0.4330268359 |

|         |               |               |               |
|---------|---------------|---------------|---------------|
| MG      | 0.4638964517  | 2.9180113575  | 1.1797794304  |
| MG      | -1.4500868597 | -2.0879587293 | 1.9838822698  |
| MG      | 1.2844058104  | -0.1236412934 | 2.2542870284  |
| 13      |               |               |               |
| Al7Mg6  |               |               |               |
| AL      | 0.4291216935  | 1.6518745480  | -2.3674568091 |
| AL      | -1.0894236058 | -2.2885293682 | -1.4984551020 |
| AL      | 0.3959696484  | -0.4944374152 | 0.0318482591  |
| AL      | 2.7063707737  | 0.9907568379  | -0.9899042750 |
| AL      | -1.8534094709 | 0.1609273392  | 2.2300462576  |
| AL      | -1.6213173448 | -2.3316102472 | 1.0891390430  |
| AL      | 2.3580466108  | 0.7031494542  | 1.6095443904  |
| MG      | -1.3906077038 | -0.2166866637 | -3.3815621501 |
| MG      | 1.4216906437  | -1.2077610925 | -2.5007253571 |
| MG      | -2.2835230564 | 0.5034754510  | -0.6071799371 |
| MG      | -0.0606160807 | 2.3559344921  | 0.4052199659  |
| MG      | 0.6913954673  | -1.4264469751 | 2.6858019140  |
| MG      | 0.2963014251  | 1.5993536393  | 3.2936848004  |
| 13      |               |               |               |
| Al8Mg5  |               |               |               |
| AL      | -2.8483521706 | 0.4980202991  | 0.6838704318  |
| AL      | -1.7436916556 | 2.2565788186  | -0.8649091021 |
| AL      | -1.2472736557 | -0.5988370031 | -1.5623307672 |
| AL      | -2.7260237764 | -2.1689357228 | 0.2685093117  |
| AL      | 0.0078357286  | 0.7895630988  | 0.8065510011  |
| AL      | -0.2457769017 | 1.4780349938  | -3.0344515040 |
| AL      | 1.3965840658  | -1.0096245111 | 2.4968590260  |
| AL      | 2.8884328462  | -1.5661223316 | 0.3676091159  |
| MG      | -1.3714108906 | -1.1259098633 | 2.6479100831  |
| MG      | 0.1632738784  | -2.4396148357 | 0.1305637016  |
| MG      | 1.1252696941  | 2.9153518781  | -0.8591336954 |
| MG      | 1.6886632461  | -0.2804104457 | -1.8325960282 |
| MG      | 2.9124695915  | 1.2519036249  | 0.7515464257  |
| 13      |               |               |               |
| Al9Mg4  |               |               |               |
| AL      | -2.7592879874 | -1.3551431247 | -0.5933358214 |
| AL      | -2.8256881926 | 0.7426652244  | 1.0783518428  |
| AL      | -0.6451374866 | 2.0644958344  | 1.8948210374  |
| AL      | -1.1610855030 | -1.0069455863 | -2.6917609991 |
| AL      | -0.6797377280 | -2.8901056126 | 0.0877292074  |
| AL      | 0.8030294637  | 2.8170603929  | -0.1892141742 |
| AL      | 1.1437373128  | -2.0253213851 | -1.7386602305 |
| AL      | -0.3387216664 | 0.0033610988  | 0.0455202494  |
| AL      | 0.3772686037  | -0.2211567413 | 2.8688509225  |
| MG      | -0.5082515095 | 1.6665081666  | -2.4155152066 |
| MG      | 2.3223897951  | 0.5086984103  | -1.1148744869 |
| MG      | 1.8641033513  | -1.6755586083 | 1.0249922108  |
| MG      | 2.4073805468  | 1.3714399310  | 1.7430954483  |
| 13      |               |               |               |
| Al10Mg3 |               |               |               |
| AL      | -2.2048033954 | 1.9555841740  | 0.2653365147  |
| AL      | -2.5533043804 | -0.4326610881 | -1.0916101963 |
| AL      | -1.8687632378 | -2.1942730974 | 0.8133837909  |
| AL      | -2.3060532930 | 0.0997248891  | 2.1633646856  |
| AL      | 0.3333300940  | 2.7767218372  | -0.0620939665 |
| AL      | 0.0033900845  | 0.1297896813  | 0.5116640319  |
| AL      | 2.2669070283  | -0.4610332145 | 2.4038787926  |
| AL      | 1.6620515702  | 0.8385231410  | -2.1534903000 |
| AL      | 2.5097534931  | 1.3711544365  | 0.5152631043  |
| AL      | 2.4451353999  | -1.1728989273 | -0.6140650008 |
| MG      | -0.9991320305 | 1.4055982137  | -2.4970106633 |
| MG      | 0.8292611768  | -2.6108197758 | 1.4040826156  |
| MG      | -0.1177715098 | -1.7054092697 | -1.6587034087 |
| 13      |               |               |               |
| Al11Mg2 |               |               |               |
| AL      | -1.4946485077 | -1.8273831434 | -1.2431878826 |
| AL      | -2.0545103652 | 0.4381775294  | 2.1660354691  |
| AL      | -2.7587646805 | 0.4927966346  | -0.3986494812 |
| AL      | -1.3746232996 | -2.0933130306 | 1.6287472544  |
| AL      | -0.7175445015 | 2.7895470468  | -0.4194256338 |
| AL      | 0.0897464939  | -0.0181797085 | 0.3426193524  |
| AL      | 0.0774306589  | 2.1004754269  | 2.1205951335  |
| AL      | 1.8167854058  | 1.5075182039  | -1.5620424375 |
| AL      | 2.6690854479  | -1.2021376554 | 0.5983513572  |

|    |               |               |               |
|----|---------------|---------------|---------------|
| AL | 2.4534415371  | 1.4296821372  | 1.0206700645  |
| AL | 1.342521719   | -1.1963317671 | -1.9685117614 |
| MG | -0.7805109233 | 0.7427718635  | -2.4124094548 |
| MG | 0.7315595625  | -3.1636255372 | 0.1272090204  |

13

Al12Mg1

|    |               |               |               |
|----|---------------|---------------|---------------|
| AL | 0.3677684940  | -0.6968277618 | -2.8332785428 |
| AL | 1.7991315281  | 1.4197572664  | -1.9841212593 |
| AL | 2.4803751795  | -0.9024970255 | -0.6222786514 |
| AL | -3.0080482268 | 0.4109149976  | 0.0743094948  |
| AL | -1.9952375646 | -1.2728006916 | -1.7434958514 |
| AL | -0.1873295544 | 0.3332563707  | -0.2571402782 |
| AL | 0.8388663741  | 2.9464624069  | 0.0197642068  |
| AL | 2.0972953670  | 1.0016842324  | 1.5400755769  |
| AL | -1.5200727396 | 2.4205283893  | 1.0971700082  |
| AL | 1.0033012138  | -1.4684653630 | 1.5489324864  |
| AL | -1.6418438535 | -1.7754855358 | 1.2184133965  |
| AL | -0.5126243277 | 0.4433176086  | 2.7147745100  |
| MG | 0.2784181102  | -2.8598438942 | -0.7731250965 |

13

Al13Mg0

|    |               |               |               |
|----|---------------|---------------|---------------|
| AL | -0.7355218891 | -0.6708012462 | -2.5627539108 |
| AL | -0.2955806230 | 2.0333733122  | -1.7629563315 |
| AL | 1.4278487776  | -1.9138705423 | -1.3724325138 |
| AL | 2.0244866884  | 0.7153748196  | -1.6752465068 |
| AL | -2.0377828015 | -2.2134721844 | -0.2438326226 |
| AL | -2.8298427278 | 0.2109349734  | -0.9407246443 |
| AL | -1.8983420443 | 2.1810335230  | 0.5218798943  |
| AL | -0.2491542950 | -0.1060976610 | 0.2559005323  |
| AL | 2.6086594381  | -0.2901718367 | 0.8420281375  |
| AL | 0.2655856747  | -2.8269213501 | 0.9144117978  |
| AL | 1.3498160087  | 2.3519237000  | 0.6714630018  |
| AL | -0.3595077226 | 1.4639320712  | 2.5908798757  |
| AL | 0.7293365158  | -0.9352385785 | 2.7613832904  |

Al0Mg14

|    |               |               |               |
|----|---------------|---------------|---------------|
| MG | -0.7437838881 | -0.0345432167 | -3.7149471454 |
| MG | 1.9769719220  | 0.8762846011  | -2.5521514537 |
| MG | -0.3645452127 | 2.8884710299  | -2.6332223064 |
| MG | 0.4298935280  | -1.6776598219 | -1.3154770829 |
| MG | -2.9510381843 | 1.2215846850  | -2.0259511137 |
| MG | -1.2903662721 | -3.1959252659 | 0.7162977898  |
| MG | 3.0997433410  | -0.6736782561 | 0.0871858462  |
| MG | 0.9047010716  | 1.2879428860  | 0.2228234744  |
| MG | -1.6107501565 | 2.9207853639  | 0.1909237343  |
| MG | 1.5718157496  | -2.9096135230 | 1.4538287250  |
| MG | -2.0674151393 | -0.2390636140 | 0.6031129753  |
| MG | 2.1621765565  | -0.2042787452 | 2.9808418281  |
| MG | -0.6449613023 | -1.6349948435 | 3.1569911078  |
| MG | -0.4724420133 | 1.3746907201  | 2.8297436213  |

Al1Mg13

|    |               |               |               |
|----|---------------|---------------|---------------|
| AL | 0.0020920079  | -1.3596884698 | -0.4324801371 |
| MG | -2.2545692123 | 1.2072379368  | -2.9590951659 |
| MG | 0.3343195421  | -0.4093074341 | -3.0997940250 |
| MG | 0.5146438165  | 2.5854925896  | -2.8583430804 |
| MG | -2.3755628526 | -1.7541463990 | -2.0991428765 |
| MG | -3.5525764076 | 0.3636675106  | -0.3442327181 |
| MG | 1.9436508133  | 0.8415209228  | -0.6385816233 |
| MG | 2.4438062191  | -2.0133352418 | 0.9151986956  |
| MG | -0.9483884396 | 2.0038394999  | -0.1721270772 |
| MG | -0.2790217073 | -2.9984870031 | 2.0415156441  |
| MG | 3.4886791512  | 0.5616929865  | 1.9848543883  |
| MG | -1.4078633906 | -0.1169158574 | 1.8967860362  |
| MG | 1.2000545327  | -0.8442089587 | 3.5452534741  |
| MG | 0.8907369274  | 1.9326399178  | 2.2201884653  |

Al2Mg12

|    |               |               |               |
|----|---------------|---------------|---------------|
| AL | 0.8858104115  | 2.1684874767  | -0.0055963650 |
| AL | 0.1819896017  | -0.4541765829 | 0.2316051164  |
| MG | 1.1428809190  | 1.7795302259  | -2.9530930456 |
| MG | -0.9758559564 | -0.6813391134 | -2.3262992823 |
| MG | 1.8614954747  | -1.0581552149 | -3.3605187746 |

|    |               |               |               |
|----|---------------|---------------|---------------|
| MG | 1.5620930450  | -2.8025999760 | -0.9032073531 |
| MG | -1.5487798367 | 2.1890389057  | -1.5603698701 |
| MG | -2.5992994585 | -0.0294331180 | 0.2288811270  |
| MG | -1.6310894747 | 2.9380728353  | 1.4013512224  |
| MG | 2.8256151199  | 0.2070890073  | -0.8531034436 |
| MG | 0.7320967550  | -4.1970959141 | 1.5774792503  |
| MG | -2.3075031547 | 0.6716093068  | 3.1772398245  |
| MG | 0.5820210722  | 1.1225799577  | 2.6668062771  |
| MG | -0.7114745179 | -1.8536077960 | 2.6788243167  |

#### Al3Mg11

|    |               |               |               |
|----|---------------|---------------|---------------|
| AL | -0.5873196550 | 0.0491533665  | -0.7669485578 |
| AL | -0.0084447718 | -1.1531756817 | 2.4474896911  |
| AL | 2.1129017658  | -0.0919595932 | -2.3461437463 |
| MG | -2.6654455909 | 0.4094022175  | 1.2694202402  |
| MG | -2.5428704467 | -2.2792522124 | 2.2787383693  |
| MG | -1.6416500514 | 2.7810137318  | -0.3524037507 |
| MG | -2.3373623354 | -2.2050694486 | -0.6740799086 |
| MG | 0.4872970412  | -2.4636765030 | -1.9459403339 |
| MG | 0.5136057225  | 2.2538991543  | -2.4262852710 |
| MG | 0.5519380398  | 1.4748197496  | 1.6829534746  |
| MG | 0.9892051959  | 3.9933027508  | 0.0016962439  |
| MG | 0.0826973817  | -3.4370140307 | 0.7399466304  |
| MG | 2.0589831379  | -1.0804491059 | 0.4710230352  |
| MG | 2.9864665665  | 1.7490066052  | -0.3794661167 |

#### Al4Mg10

|    |               |               |               |
|----|---------------|---------------|---------------|
| AL | -1.6706888813 | -1.3674657825 | 1.4424803925  |
| AL | -1.1213288899 | 1.6119086267  | 1.0698118098  |
| AL | -0.4630779069 | -0.5547687069 | -0.7121097189 |
| AL | 1.3417332771  | -0.9358191927 | 1.4791589743  |
| MG | -1.8876913348 | 0.6939247706  | -3.2433639250 |
| MG | -2.0749091971 | 0.6358028836  | 3.5174889172  |
| MG | -1.6954143055 | -2.2218565625 | -3.1616692566 |
| MG | -0.5927113147 | 2.7676354769  | -1.5755134268 |
| MG | -0.0554890543 | -1.4635610656 | 3.8568865610  |
| MG | 0.8878584275  | 1.3772939030  | 3.2368099101  |
| MG | 1.1785499562  | -2.4158807578 | -2.6827574971 |
| MG | 1.4886690115  | 1.0048980154  | -2.6272865067 |
| MG | 1.6765764196  | 1.7182828039  | 0.3418490653  |
| MG | 2.9879217926  | -0.8503934122 | -0.9417862990 |

#### Al5Mg9

|    |               |               |               |
|----|---------------|---------------|---------------|
| AL | -0.4728696936 | 0.4336932330  | -1.2078760509 |
| AL | 2.0464711438  | -0.4295406912 | -2.1884992262 |
| AL | -2.8382507959 | 1.1609322327  | 0.2917531459  |
| AL | 1.3899282927  | 2.3462883260  | 1.4725205412  |
| AL | 0.4764930149  | -0.4550938868 | 1.2175258032  |
| MG | -0.0850931501 | -2.3308309035 | -2.3266594961 |
| MG | 1.6799503310  | 2.3070948515  | -1.3983279206 |
| MG | 3.1665299957  | 0.3165421719  | 0.3956864974  |
| MG | -2.6765040415 | -1.4683888605 | -1.0167961892 |
| MG | -0.5870855477 | -3.2033458872 | 0.5090804804  |
| MG | -2.2765367848 | -1.0245434013 | 2.0201829329  |
| MG | -0.9227020229 | 3.1996365628  | -0.1694327403 |
| MG | 2.1940927923  | -2.5631423973 | -0.1910765234 |
| MG | -1.0944225339 | 1.7106986501  | 2.5919177457  |

#### Al6Mg8

|    |               |               |               |
|----|---------------|---------------|---------------|
| AL | -2.3345331283 | 0.4028134471  | -1.7884975699 |
| AL | -1.0605935711 | 0.4435212150  | 0.7401404459  |
| AL | -1.0231912247 | 2.6729888256  | -0.9507528737 |
| AL | -0.8493468740 | -1.9339663478 | 2.2338924125  |
| AL | 1.0823000005  | -0.4578159766 | -0.7836368253 |
| AL | 2.5046247192  | 1.0865072481  | 1.3099933937  |
| MG | -2.5100971909 | -1.9790311379 | -0.1173602499 |
| MG | -0.7475422692 | -1.8942822327 | -2.6525455038 |
| MG | 0.1867888529  | -3.3061192034 | -0.2163267153 |
| MG | 0.2347724961  | 2.9192313623  | 1.5740681486  |
| MG | 0.4059695951  | 0.4067353520  | 3.2780605300  |

|    |              |               |               |
|----|--------------|---------------|---------------|
| MG | 0.1591236710 | 0.9865375376  | -3.1920072432 |
| MG | 1.9211010469 | 2.3804537858  | -1.1403142492 |
| MG | 2.0306218764 | -1.7275758750 | 1.7052872996  |

Al7Mg7

|    |               |               |               |
|----|---------------|---------------|---------------|
| AL | -1.7883359841 | -2.4191701952 | 0.1170761948  |
| AL | -1.4467397180 | 0.3659119138  | 1.0576247352  |
| AL | -0.6509859959 | 0.8212844296  | -2.8653624603 |
| AL | -0.1580052665 | -1.8472816809 | 2.1845750130  |
| AL | 0.1633420848  | 2.7624827622  | 1.2184254690  |
| AL | 0.7327196289  | -0.1853449213 | -0.5427288756 |
| AL | 2.5531128931  | -1.3220505580 | 1.3531532216  |
| MG | -2.9149439074 | -0.2486487300 | -1.3550058953 |
| MG | -1.8549041817 | 2.5293085936  | -0.7782129176 |
| MG | 0.8637498595  | 0.6394011406  | 3.0062595063  |
| MG | -0.5139150006 | -1.9564032954 | -2.5048033604 |
| MG | 1.1134756442  | -3.1122537646 | -0.1907481440 |
| MG | 1.1249501397  | 2.5441565612  | -1.5304355860 |
| MG | 2.7764798042  | 1.4286077445  | 0.8301830991  |

Al8Mg6

|    |               |               |               |
|----|---------------|---------------|---------------|
| AL | -1.4009651255 | -0.8445504771 | -2.3535781323 |
| AL | -1.3103111819 | 1.9801743523  | -2.0632892088 |
| AL | 2.7866447497  | -0.4021017588 | -0.8489965722 |
| AL | -1.0616017085 | -1.7447813969 | 0.1806012511  |
| AL | 0.2991765755  | 0.6132167292  | -0.0482035700 |
| AL | 2.5972805784  | 0.3369157115  | 1.6865108091  |
| AL | -1.9186132187 | 0.4021633515  | 2.3283231541  |
| AL | 0.2690676881  | -1.1712868768 | 2.5042524319  |
| MG | 0.9630231570  | -2.2737538230 | -2.1343452603 |
| MG | 1.0608483941  | 0.8602925671  | -2.8485211025 |
| MG | -3.0561168228 | 0.2656821125  | -0.3834762313 |
| MG | -1.5725534331 | 2.7210950199  | 0.6073429098  |
| MG | 1.7784556547  | -2.6252626650 | 0.7327097178  |
| MG | 0.5656636929  | 1.8821961537  | 2.6406688035  |

Al9Mg5

|    |               |               |               |
|----|---------------|---------------|---------------|
| AL | -0.7867856395 | 0.4949030081  | -2.7661285636 |
| AL | -1.9214052062 | 0.9006430735  | -0.1858861334 |
| AL | 2.4978352047  | 1.8007486775  | 0.2609614005  |
| AL | 0.0472590722  | 2.5621487673  | -1.2766795409 |
| AL | 0.5576612922  | -0.2392488085 | 0.0463333714  |
| AL | -2.2181068360 | -1.4880907863 | 1.1727331491  |
| AL | -1.2860768174 | 0.4903541659  | 2.5757950679  |
| AL | -0.1797941458 | 2.6047147953  | 1.3292917601  |
| AL | 0.6985913017  | -1.8205914635 | 2.3256563602  |
| MG | 2.2002771114  | 0.7561793576  | -2.2842586272 |
| MG | 0.9171875901  | -1.9167914983 | -2.3754413107 |
| MG | -2.1152635033 | -1.6801862303 | -1.6334984898 |
| MG | -0.1148534355 | -3.2399210347 | 0.1006712285  |
| MG | 1.7034740114  | 0.7751389766  | 2.7104503280  |

Al10Mg4

|    |               |               |               |
|----|---------------|---------------|---------------|
| AL | -2.0140917301 | -1.4658207696 | -1.3735855961 |
| AL | 1.3633689169  | 1.4323459729  | -2.1869060602 |
| AL | -2.7158490652 | 1.1763355246  | -0.1904488804 |
| AL | -0.0956619570 | 0.1607917367  | 0.1843323744  |
| AL | -0.5995258060 | 2.7503557280  | -0.8072849492 |
| AL | 1.8736702876  | -1.9341679621 | 0.6153708078  |
| AL | 2.8250522288  | 0.4881761162  | -0.2712481938 |
| AL | -0.6638203311 | -2.7638364039 | 0.4477594154  |
| AL | 0.6374497673  | 2.4229927228  | 1.5425405833  |
| AL | 0.0044008113  | -1.0266045864 | 2.7064290915  |
| MG | -1.2238840998 | 0.6661577250  | -2.8360091786 |
| MG | 0.8334289656  | -1.4275094977 | -1.9639738708 |
| MG | -2.5673660924 | -0.8425841286 | 1.6537196075  |
| MG | 2.3428281042  | 0.3633688221  | 2.4793038493  |

Al11Mg3

|    |               |               |               |
|----|---------------|---------------|---------------|
| AL | 1.3225069531  | 1.2112120256  | -2.2723668236 |
| AL | -1.3906165242 | 1.5713219577  | -1.7238251128 |
| AL | -0.4553829169 | -2.6973511292 | -0.7731733366 |
| AL | 2.5258308267  | 1.6744329618  | 0.1202991086  |
| AL | 0.1480833017  | 0.0013872175  | 0.0889870654  |
| AL | -2.2843846475 | 1.1903688545  | 0.9178116140  |
| AL | -1.6485232455 | -1.3910208067 | 1.8225591991  |
| AL | 0.0227040149  | 2.8680122379  | 0.3350895599  |
| AL | 0.8914981981  | -2.3409281735 | 1.5993088957  |
| AL | 2.0782617299  | 0.0388581431  | 2.1621136157  |
| AL | -0.2867656001 | 1.2116939501  | 2.7719467331  |
| MG | -0.3616740513 | -0.9229076805 | -2.9324537981 |
| MG | -2.6919369696 | -0.9510237279 | -0.8984814115 |
| MG | 2.1304009306  | -1.4640538304 | -1.2178163089 |

#### Al12Mg2

|    |               |               |               |
|----|---------------|---------------|---------------|
| AL | -2.6664274797 | -0.9038562128 | -0.3798311015 |
| AL | -1.6884631994 | 0.9739403783  | -2.1790131235 |
| AL | -2.0435432897 | 0.7708557057  | 2.0163120832  |
| AL | -1.5865739280 | 2.5505075136  | 0.0853772820  |
| AL | -0.9547538446 | -1.6074051367 | 2.4675021216  |
| AL | -0.4151000869 | -1.3948024906 | -2.4939613340 |
| AL | -0.5128206709 | -2.7120697858 | -0.0577787395 |
| AL | -0.0609555186 | 0.0716464928  | 0.0236729836  |
| AL | 0.8896586120  | 1.2215350544  | 2.4033291552  |
| AL | 1.1716289931  | 2.6800572773  | 0.0533907014  |
| AL | 1.7109342784  | -1.3875010028 | 1.6683819088  |
| AL | 2.8338426017  | 0.5458387449  | 0.0389191817  |
| MG | 1.2575571768  | 1.0159246336  | -2.3902016111 |
| MG | 2.0650173557  | -1.8246731720 | -1.2560995080 |

#### Al13Mg1

|    |               |               |               |
|----|---------------|---------------|---------------|
| AL | -2.2346310367 | 1.5339403105  | 0.0713713814  |
| AL | -2.0501017760 | -0.8034835242 | -1.4776125223 |
| AL | -0.9636663630 | 1.1434119469  | 2.5277778685  |
| AL | -0.9379165519 | 1.1827171448  | -2.9934175380 |
| AL | 0.1550123239  | 2.7444338031  | -0.5645490103 |
| AL | 0.1223191245  | 0.0107315353  | 0.1121765343  |
| AL | -0.8495305025 | -2.7343862593 | 0.1672759101  |
| AL | 0.5639470035  | -1.2895982323 | 2.5815277729  |
| AL | 0.5771036883  | -1.6239145834 | -2.0947632375 |
| AL | 1.8589260756  | -2.2628109099 | 0.2648712908  |
| AL | 1.7749519006  | 0.9434225267  | -2.0696877371 |
| AL | 1.4828172068  | 1.9413506042  | 1.7191190634  |
| AL | 2.9915377900  | 0.2271075139  | 0.2127368707  |
| MG | -2.4907698833 | -1.0129218764 | 1.5431743531  |

#### Al14Mg0

|    |               |               |               |
|----|---------------|---------------|---------------|
| AL | -2.4748107492 | -0.0820324913 | 1.6396818206  |
| AL | -3.0906423085 | -0.0770342823 | -1.0353080721 |
| AL | -0.7345787753 | -2.4981784322 | -1.5497333151 |
| AL | -0.8299831738 | 2.4966502016  | -1.4026844158 |
| AL | -1.1942817359 | 2.3176567349  | 1.2437118548  |
| AL | -1.1456207030 | -2.4322546701 | 1.1310395338  |
| AL | -0.8414276402 | 0.0150232637  | -2.7914597458 |
| AL | -0.3111255635 | -0.0346625655 | -0.1054948697 |
| AL | 1.8430128559  | -1.3906142091 | -1.4093418178 |
| AL | 1.5816438086  | 1.7935652422  | 0.8636349547  |
| AL | 0.1262422817  | 0.1958216184  | 2.7440980849  |
| AL | 1.5475665791  | -1.6803257747 | 1.2725730384  |
| AL | 1.6289129594  | 1.2685166120  | -1.8278601423 |
| AL | 3.8950921648  | 0.1078697524  | 1.2271430913  |

#### 15

##### Al0Mg15

|    |               |               |               |
|----|---------------|---------------|---------------|
| MG | -1.0524622170 | 0.9796198656  | -3.4142280115 |
| MG | 1.8267926933  | 0.9522917403  | -2.6377515343 |
| MG | 0.5837198919  | -1.6885258223 | -3.2402316590 |
| MG | -0.3404675032 | -3.2219272511 | -0.8557165438 |
| MG | -0.1074121822 | 2.0055656090  | -0.4849370756 |
| MG | -2.4013310260 | -1.6210740624 | -2.2984058033 |



|    |               |               |               |
|----|---------------|---------------|---------------|
| MG | 1.7738112611  | -1.0497162160 | -0.2920930992 |
| MG | -1.6546692138 | -0.9618826994 | 0.7763856982  |
| MG | -2.9728692988 | 1.0658007612  | -1.1354598381 |
| MG | 2.8173742915  | 1.7565543077  | 0.4468143734  |
| MG | 0.6444512549  | -2.4175520368 | 2.2292425307  |
| MG | 0.8599590056  | 2.5305203693  | 2.5577499090  |
| MG | -0.4918792648 | -0.0637057331 | 3.6641965508  |
| MG | 2.4994057783  | -0.1371205798 | 2.7302864053  |
| MG | -1.9844244707 | 1.8711517479  | 1.9541480974  |

15

Al1Mg14

|    |               |               |               |
|----|---------------|---------------|---------------|
| AL | -0.5616989178 | -0.2802750932 | 0.3293445892  |
| MG | -4.3550633464 | -0.4666298700 | 2.3441847783  |
| MG | -2.6872002388 | 1.8402976139  | 1.3819221872  |
| MG | -1.9986448459 | 1.5607016797  | -1.4985434236 |
| MG | -2.3885422666 | -2.4710142483 | 1.3962244804  |
| MG | -0.2672009639 | -0.7063501825 | -2.5321202022 |
| MG | -0.5473688938 | 3.6552193302  | 0.1304220772  |
| MG | 0.1693279735  | -3.2485612820 | 0.0692726691  |
| MG | 0.1193344799  | 1.7496047826  | 2.3793937542  |
| MG | 0.8098454696  | 2.2707606395  | -2.2396700678 |
| MG | 1.7418982397  | -2.9235260679 | -2.5187404400 |
| MG | 2.0246472928  | -0.4916927203 | 1.6431201574  |
| MG | 2.5236034113  | -0.1033245939 | -1.3714116646 |
| MG | 2.2397645078  | 2.4114976039  | 0.3651921371  |
| MG | 3.1773000986  | -2.7967065919 | 0.1214079679  |

15

Al2Mg13

|    |               |               |               |
|----|---------------|---------------|---------------|
| AL | -2.1793995496 | -0.0172503706 | 0.8415965987  |
| AL | 0.6524634375  | -0.2108643077 | 0.3763796299  |
| MG | -1.6662302617 | -2.8180749722 | 1.0547607728  |
| MG | -1.1965665906 | 2.1024703858  | -0.8881163906 |
| MG | -1.4957347332 | -1.0965866793 | -1.7789233569 |
| MG | 1.2935560240  | 3.2154915331  | -2.0988178846 |
| MG | -1.4929232403 | -0.7470828883 | 3.4277635692  |
| MG | -1.1092795340 | 2.1799168577  | 2.3472636029  |
| MG | 0.8841636966  | -2.3250989866 | 2.3629755020  |
| MG | 1.4154567358  | 2.5891786637  | 0.7261876918  |
| MG | 0.9178662113  | -1.8629985656 | -3.4091790271 |
| MG | -0.2430270057 | 0.9766654792  | -3.5597696390 |
| MG | 1.1853912032  | 0.5878653610  | 3.1615677650  |
| MG | 0.7735626475  | -2.9467101779 | -0.7136682708 |
| MG | 2.2607009592  | 0.3730806677  | -1.8500205633 |

15

Al3Mg12

|    |               |               |               |
|----|---------------|---------------|---------------|
| AL | -0.0633906966 | -1.1917936225 | -2.7821607533 |
| AL | -0.3265252707 | 2.2067090862  | 1.7524079686  |
| AL | -0.5739007673 | -0.0980448648 | 0.1516364403  |
| MG | 1.8419293802  | 0.7430005915  | -2.2102421137 |
| MG | -1.1484139562 | -3.4330331723 | -1.4818127002 |
| MG | -0.8213752642 | 1.7599774117  | -3.0393912009 |
| MG | 0.7169822628  | 3.0977026401  | -0.7993116078 |
| MG | 1.5687632958  | -1.9670452360 | -0.5212263310 |
| MG | -0.9195355704 | -2.8689000476 | 1.3445245320  |
| MG | -2.1817288696 | 2.2950765257  | -0.4547435012 |
| MG | -2.5663735520 | -0.3673116799 | -1.7958942291 |
| MG | 2.1892562881  | 0.8537817011  | 0.7467436647  |
| MG | 1.5309399167  | 1.0820701633  | 3.5777955718  |
| MG | 1.7639968200  | -1.7318707559 | 2.5008266164  |
| MG | -1.0106250165 | -0.3803197407 | 3.0108486433  |

15

Al4Mg11

|    |               |               |               |
|----|---------------|---------------|---------------|
| AL | 0.1429102558  | 1.1043344439  | -0.6025992022 |
| AL | -0.5254786110 | -1.4485399790 | 0.3405061783  |
| AL | 1.9032336268  | -1.6405691820 | 1.4683412428  |
| AL | -1.5314453417 | 2.1791516278  | 1.9424205522  |
| MG | 1.4810894148  | -0.0464071403 | -3.0123020088 |
| MG | -1.4300241346 | 0.5181297053  | -3.0532249496 |
| MG | 2.2195736508  | -2.3113875525 | -1.2039895289 |
| MG | -3.0512294144 | -1.2674650895 | -1.0919694206 |
| MG | -2.8411646837 | 1.7039228735  | -0.5886663554 |
| MG | -0.5114505577 | -2.3201155990 | -2.5966830904 |
| MG | 1.1972405421  | 2.6322512873  | 1.5497878625  |
| MG | 3.0027227403  | 0.6885331980  | -0.4756807489 |

|         |               |               |               |
|---------|---------------|---------------|---------------|
| MG      | -2.9381713352 | -0.2893562512 | 1.7080105822  |
| MG      | -0.0959098444 | -0.1269979303 | 2.9597277797  |
| MG      | 2.9781046921  | 0.6245175881  | 2.6563211071  |
| 15      |               |               |               |
| Al5Mg10 |               |               |               |
| AL      | 2.1886439291  | 0.4969289476  | -1.1432402453 |
| AL      | -1.9086877689 | -0.8115947752 | -2.2237794413 |
| AL      | 1.6378835896  | 2.4420361252  | 0.6816914589  |
| AL      | -0.1669202724 | -0.2514748791 | 0.3101400996  |
| AL      | -2.2876493525 | 0.7841169644  | 1.9810687912  |
| MG      | 0.7932031225  | -1.1819456084 | -2.9562874157 |
| MG      | -0.3008289669 | 1.7204694933  | -1.7538057170 |
| MG      | -0.3309042087 | -2.9658054551 | -0.8481171063 |
| MG      | -3.0391963762 | 1.4331987800  | -0.7796312058 |
| MG      | 2.6427961248  | -2.2778068209 | -0.6710302431 |
| MG      | -2.9018245878 | -1.3980123548 | 0.3411420216  |
| MG      | 3.0954112677  | 0.0595395004  | 1.5425082848  |
| MG      | -1.0797518015 | 3.1206802758  | 0.8314751206  |
| MG      | 0.4287118114  | 0.9736897783  | 2.8724966350  |
| MG      | 1.2291124900  | -2.1440199714 | 1.8153689627  |
| 15      |               |               |               |
| Al6Mg9  |               |               |               |
| AL      | -2.6094553239 | -0.7446890218 | -0.3771908072 |
| AL      | -0.8041012408 | -2.9392030520 | -0.5697737690 |
| AL      | -0.0643168704 | 0.0312149808  | 0.2901624375  |
| AL      | 0.2632496453  | 0.9684985663  | -2.3428999320 |
| AL      | 0.8977938689  | -0.3440142946 | 3.0159595882  |
| AL      | 2.8143161544  | -0.3760237289 | 1.0116687273  |
| MG      | -2.1317222822 | 1.8519212631  | 0.9219822986  |
| MG      | 0.9400162208  | 2.2512726726  | 2.0771563719  |
| MG      | -1.2098610952 | -1.3238548380 | -2.8351429587 |
| MG      | -2.4482316746 | 1.6175782429  | -1.9489514835 |
| MG      | -1.2097306979 | -1.9361248581 | 2.0983756534  |
| MG      | 1.6837710711  | -1.4196085454 | -1.3994084184 |
| MG      | -0.1117405451 | 3.2688822903  | -0.6338096075 |
| MG      | 2.5247734364  | 1.8854630914  | -0.5438683559 |
| MG      | 1.4652393331  | -2.7913137685 | 1.2357392552  |
| 15      |               |               |               |
| Al7Mg8  |               |               |               |
| AL      | -2.7656035539 | -0.1082057622 | 0.5684868302  |
| AL      | -0.9678308382 | -0.6277737686 | 2.6690945141  |
| AL      | 0.3164204088  | 1.6295538043  | -2.3360330971 |
| AL      | 0.4231510065  | -2.7578685491 | -1.1631426677 |
| AL      | 0.1067374128  | -0.0563094857 | 0.0683153121  |
| AL      | 2.6596389179  | -1.3361747144 | -0.2100711049 |
| AL      | 2.5281203723  | 1.3002700289  | -0.6079816603 |
| MG      | -1.7825690207 | -2.6933236886 | 0.5765491764  |
| MG      | -1.5025262155 | -0.7474691166 | -2.0093363821 |
| MG      | -1.4674865281 | 2.0642563866  | 2.0805861718  |
| MG      | -2.0112058843 | 2.1951852699  | -0.8783580211 |
| MG      | 0.9558749498  | -2.4508150034 | 1.7604022904  |
| MG      | 1.5564996999  | -0.7649007953 | -2.8350159685 |
| MG      | 1.3420050381  | 1.1490415618  | 2.1834565540  |
| MG      | 0.6087752347  | 3.2045328324  | 0.1330490527  |
| 15      |               |               |               |
| Al8Mg7  |               |               |               |
| AL      | -1.7066884809 | 0.5223014490  | -2.2701367243 |
| AL      | -1.4112485549 | 1.3893475539  | 2.1090580361  |
| AL      | -1.8561243123 | -1.4439994532 | 1.7375992227  |
| AL      | 0.0821521357  | -1.7108796459 | -2.3475488678 |
| AL      | 0.4380062659  | -0.7337215986 | 2.7962372907  |
| AL      | 0.0046381184  | 0.0056072552  | 0.0026836712  |
| AL      | 2.4373376580  | -0.9764134522 | -1.2626733881 |
| AL      | 2.2434993508  | 1.7733846528  | -0.4358800978 |
| MG      | -3.1290976464 | 0.6601002960  | 0.0625405592  |
| MG      | -2.2296053730 | -2.0820892705 | -0.9546398753 |
| MG      | -0.5624570547 | 2.5741290929  | -0.5402060462 |
| MG      | 0.6006159918  | -2.5890817177 | 0.4315652143  |
| MG      | 0.9800142649  | 1.0632299420  | -2.8268386498 |
| MG      | 1.2766934410  | 2.0424627548  | 2.1113838681  |
| MG      | 2.8322641957  | -0.4943788584 | 1.3868587872  |
| 15      |               |               |               |
| Al9Mg6  |               |               |               |
| AL      | -0.4038110620 | 0.6415028886  | -2.7627164377 |

|    |               |               |               |
|----|---------------|---------------|---------------|
| AL | 0.2951891477  | -2.0198708766 | -1.9031459357 |
| AL | -1.9098615380 | -2.1972792982 | 0.5808030646  |
| AL | -1.8349803051 | 1.9827128005  | -0.7594634078 |
| AL | -0.0057841521 | -0.0526818369 | 0.0291388194  |
| AL | 2.4440265092  | -1.4929162672 | -0.1343851875 |
| AL | 0.5281505655  | -2.6010151060 | 1.4008545525  |
| AL | -0.9880643540 | -0.4020527883 | 2.7322830879  |
| AL | 1.6689786605  | -0.1546111549 | 2.4652387047  |
| MG | 2.3180000872  | 0.3192740785  | -2.2220634174 |
| MG | -2.5257922411 | -0.8076176065 | -1.6844984721 |
| MG | 0.8655960543  | 2.7649907443  | -1.1437452741 |
| MG | 2.7986927278  | 1.4026336914  | 0.5594575667  |
| MG | -3.0493210623 | 0.4105388264  | 1.1486122465  |
| MG | -0.2010180377 | 2.2063929048  | 1.6936310900  |

15  
Al10Mg5

|    |               |               |               |
|----|---------------|---------------|---------------|
| AL | 1.2834582568  | 1.6035444348  | -2.0331522247 |
| AL | -1.9082454288 | 0.7419013132  | -1.7689536723 |
| AL | 1.2246592753  | -2.4265481155 | -1.1239029182 |
| AL | 2.9487080568  | -0.5411802716 | -0.3704516022 |
| AL | -2.4168697219 | -1.4571705700 | 0.6371305009  |
| AL | 0.0457257686  | -0.0757452524 | -0.0290283695 |
| AL | 1.9617115133  | 1.9764576772  | 0.5269407087  |
| AL | 0.4286707469  | -2.6295442709 | 1.4174655249  |
| AL | 1.8453156720  | -0.3245429163 | 2.2159995449  |
| AL | -0.9660961082 | -0.4358951619 | 2.6268346629  |
| MG | 0.3756958539  | -0.6631409729 | -3.2221221026 |
| MG | -1.5505745680 | -2.2907415272 | -1.7991325381 |
| MG | -0.6328380824 | 3.0063851725  | -0.4611739853 |
| MG | -2.6121385090 | 1.3771979419  | 0.9723923960  |
| MG | -0.0271837254 | 2.1390205192  | 2.4111540747  |

15  
Al11Mg4

|    |               |               |               |
|----|---------------|---------------|---------------|
| AL | -2.5640968920 | 1.1817514464  | -0.6873489139 |
| AL | -2.4871037703 | -1.4231699004 | 0.4478375508  |
| AL | -1.6277580469 | -0.5896217585 | -2.5792609451 |
| AL | -1.8451686091 | 1.5205692775  | 2.0412219630  |
| AL | -0.3812410893 | 2.8315905792  | -0.0531512878 |
| AL | -0.7709950659 | -2.7336630391 | -1.2697179087 |
| AL | -0.1175422325 | -0.0404334109 | -0.1302195885 |
| AL | -0.5653976900 | -0.7832155643 | 2.5671653889  |
| AL | 1.3135736913  | 1.4605552229  | 1.6284016667  |
| AL | 2.0245521688  | 1.7120183788  | -1.2159596040 |
| AL | 2.7090579153  | -0.5180284952 | 0.1399954708  |
| MG | -0.3296138332 | 1.8453326267  | -2.7051048195 |
| MG | 1.3190850567  | -0.9617866344 | -2.3997295509 |
| MG | 0.9221515659  | -2.6244674598 | 0.9546504841  |
| MG | 2.4004978311  | -0.8774312688 | 3.2612190942  |

15  
Al12Mg3

|    |               |               |               |
|----|---------------|---------------|---------------|
| AL | -2.4130162703 | -0.7154800193 | 0.3778484850  |
| AL | -1.8476445053 | 1.7607989835  | -0.9430715528 |
| AL | -3.3871024395 | -1.0220916669 | -2.4905719564 |
| AL | -0.8596508427 | 2.5236318789  | 1.5237247396  |
| AL | -0.3979992492 | -2.2725454128 | -0.9859192716 |
| AL | -1.3761221607 | 0.2230427585  | 2.7350175974  |
| AL | 0.2141334162  | 0.1794475184  | 0.1418535101  |
| AL | -0.6763205466 | -0.0411758162 | -2.6454379198 |
| AL | 1.0052893678  | 2.0709290231  | -1.8320716306 |
| AL | 1.7722883880  | 2.4783798305  | 0.7506237204  |
| AL | 1.8536125446  | -2.1646657488 | 0.6547397068  |
| AL | 3.1032055952  | 0.2175801381  | 0.1536920343  |
| MG | -0.5098001920 | -2.3710694687 | 2.0544681649  |
| MG | 2.0060415662  | -0.8888869793 | -2.1216722336 |
| MG | 1.5130873284  | 0.0221059811  | 2.6267766064  |

15  
Al13Mg2

|    |               |               |               |
|----|---------------|---------------|---------------|
| AL | -2.6197193696 | -0.2111425345 | -1.6841538497 |
| AL | -2.6310441430 | -1.6871687757 | 0.7212045921  |
| AL | -0.6896603087 | -2.0179020563 | -2.4812855633 |
| AL | -1.2469594873 | 0.0541707946  | 2.4416295570  |
| AL | -2.4152515227 | 1.4551794903  | 0.4159016995  |
| AL | -0.2214211966 | -0.3961462383 | -0.1305621973 |
| AL | 0.2548750576  | -2.3260666057 | 2.2507058575  |

|    |               |               |               |
|----|---------------|---------------|---------------|
| AL | 0.1173556346  | -3.2198259708 | -0.2653998833 |
| AL | 1.2661406379  | -0.1099310273 | -2.6040773213 |
| AL | 1.6709735448  | 0.0341691343  | 1.8893724939  |
| AL | 2.6619197008  | 3.8751449333  | 0.7760229502  |
| AL | 2.0099594641  | 1.4691592061  | -0.5168032770 |
| AL | 2.4134719600  | -1.4542391764 | -0.4129209317 |
| MG | -0.6006595409 | 1.9955151973  | -1.7623917747 |
| MG | 0.0300175688  | 2.5390836290  | 1.3627576480  |

15

Al14Mg1

|    |               |               |               |
|----|---------------|---------------|---------------|
| AL | -2.4312854930 | 1.2419968250  | -1.8769666765 |
| AL | 1.7322559554  | 0.0742244998  | -2.2206730313 |
| AL | -0.5157861684 | -1.1780211312 | -2.8251513982 |
| AL | -0.0131876419 | 2.2437907384  | -2.0081301797 |
| AL | -2.5397518326 | -1.5422807433 | -0.9732591794 |
| AL | 2.6110527123  | -0.6044552302 | 0.2432178082  |
| AL | -0.3148391936 | 0.2057829815  | -0.2191384792 |
| AL | -2.6816274081 | 1.4234028149  | 0.8404081214  |
| AL | 0.4703101360  | -2.3858159144 | -0.3166833152 |
| AL | -0.4720798016 | 2.9904766884  | 0.7893856747  |
| AL | 2.9870667413  | -2.4306242646 | 2.3123494080  |
| AL | -1.9887159488 | -1.0428897526 | 1.6345351694  |
| AL | 0.7272412879  | 0.7742921317  | 2.2190488800  |
| AL | 0.3226952773  | -1.9406643948 | 2.4912823531  |
| MG | 2.1066523779  | 2.1707847513  | -0.0902231554 |

15

Al15Mg0

|    |               |               |               |
|----|---------------|---------------|---------------|
| AL | -2.6002904432 | -0.2265070971 | 1.1544041363  |
| AL | -2.1687322551 | -0.6907997726 | -1.7041936388 |
| AL | -2.0467398566 | 1.9212899574  | -0.4033795566 |
| AL | -2.7684612723 | -2.5357842186 | 2.6044701460  |
| AL | -0.6668216097 | 1.7196870551  | 2.1656414499  |
| AL | -0.2588764447 | -2.3921078508 | 1.5372595490  |
| AL | -0.2902921986 | 1.3338912832  | -2.5043992258 |
| AL | -0.0053393449 | -0.0054226141 | 0.0042192265  |
| AL | -0.1815917578 | -2.4749991497 | -1.3814232094 |
| AL | 0.6144696621  | 2.7785454828  | -0.1657612714 |
| AL | 1.2671819325  | -0.1127097856 | 2.5379031274  |
| AL | 2.1147279566  | -1.8669827078 | 0.3424747487  |
| AL | 1.8231943135  | -0.5592353563 | -2.1195508087 |
| AL | 2.4637703141  | 2.2443328875  | -2.3095559772 |
| AL | 2.7038030040  | 0.8668028867  | 0.2418923041  |

Al0Mg20

|    |               |               |               |
|----|---------------|---------------|---------------|
| MG | -2.7330979385 | 0.3888911895  | -1.5538627275 |
| MG | -2.8952810191 | 0.0729052383  | 1.4532356083  |
| MG | -2.5062318543 | -2.6714406797 | 2.7992880689  |
| MG | -1.9780725797 | -2.3513653493 | -0.1598285955 |
| MG | -0.5698279303 | 1.0031902597  | -3.5588963647 |
| MG | -1.2018580662 | -1.8634888866 | -3.0007444028 |
| MG | -3.4372606000 | 2.8334267685  | 0.1859236886  |
| MG | -0.9436596104 | 2.3494992464  | 1.9193197441  |
| MG | -0.3411989504 | -0.5630919050 | 3.0060845238  |
| MG | 0.1756854600  | -3.4868746682 | 1.8895778777  |
| MG | -0.8245300801 | 2.9072718438  | -1.2277997754 |
| MG | 0.9128195805  | -2.8624620386 | -0.9999079501 |
| MG | 1.5763101131  | -1.1317246399 | -3.5530077819 |
| MG | 0.0569548287  | 0.0283029157  | -0.0439125193 |
| MG | 1.8498123810  | 1.4649512173  | 2.8870999704  |
| MG | 1.5601477901  | 3.3371090847  | 0.5762569228  |
| MG | 2.3224677894  | -1.3307894913 | 1.7090187646  |
| MG | 1.9204755278  | 1.5894996287  | -1.8972906876 |
| MG | 3.2747279353  | -0.9932603128 | -1.1308951907 |
| MG | 3.7816162233  | 1.2794495788  | 0.7003418262  |

Al1Mg19

|    |               |               |               |
|----|---------------|---------------|---------------|
| AL | 0.0050824378  | -0.1715246782 | -0.0386964542 |
| MG | -2.6964351049 | -1.0651364196 | 1.3700929801  |
| MG | -3.5664181531 | 0.9336511179  | -0.8148122804 |
| MG | -1.6457622946 | 1.7656723407  | 1.4346671511  |
| MG | -1.9064478880 | 3.3177763889  | -1.2419050562 |
| MG | -1.4014907243 | -3.4428132082 | -0.0213193535 |
| MG | -0.8578137328 | -0.0235747250 | 3.7605350246  |
| MG | -1.1798981104 | 0.7025594136  | -2.7363537564 |

|    |               |               |               |
|----|---------------|---------------|---------------|
| MG | -2.9931038141 | -1.7240260443 | -1.7633711023 |
| MG | -0.3876006469 | -2.6406740372 | 2.6340144049  |
| MG | -0.0481740820 | -2.0956938264 | -2.3957658555 |
| MG | 0.3638522532  | 3.9345785741  | 0.6622660938  |
| MG | 0.9845378113  | 2.2188949385  | 3.0513913202  |
| MG | 0.8819377922  | 2.9530029961  | -2.1378627164 |
| MG | 1.9056833473  | -0.5795555472 | 2.4404455727  |
| MG | 1.9592903346  | 0.2873346960  | -2.4582571761 |
| MG | 1.5056754852  | -2.7891213300 | 0.3258620301  |
| MG | 2.3456829778  | 1.7106667276  | 0.3307289738  |
| MG | 2.9518753587  | -2.4720512537 | -2.3622241132 |
| MG | 3.7795257530  | -0.8199661236 | -0.0394366871 |

#### Al2Mg18

|    |               |               |               |
|----|---------------|---------------|---------------|
| AL | 0.2406079581  | 0.4423976817  | 0.0555865525  |
| AL | -2.0784995751 | -0.9365631840 | -0.6134304396 |
| MG | 1.6205836184  | 0.7962910107  | -2.6649215520 |
| MG | -1.3766831984 | 0.1672740141  | -3.2233991897 |
| MG | -0.7644919973 | 2.9323463865  | -2.5687188005 |
| MG | 0.3991222254  | -1.9125652411 | -2.0269185642 |
| MG | 1.5716564544  | 3.1605802377  | -0.8101291836 |
| MG | -2.5868896148 | -6.4488671550 | -1.2661646179 |
| MG | -2.9838956498 | 1.7291986742  | -1.0740622237 |
| MG | 3.1189143787  | -1.3570431831 | -1.0437382019 |
| MG | 3.8431479880  | 1.3899700547  | -0.4349548355 |
| MG | -1.3225665318 | -3.7008161455 | -0.3676200946 |
| MG | -1.0487496913 | 3.2631594697  | 0.6112325460  |
| MG | 1.0476260325  | -2.4213649103 | 0.9786224840  |
| MG | 1.8100569629  | 2.2697059831  | 2.0080549503  |
| MG | -1.7623640409 | -2.0814331716 | 2.1667082518  |
| MG | 3.1072199276  | -0.4123786543 | 1.8533130196  |
| MG | -2.3967081763 | 0.7836788754  | 1.7798788551  |
| MG | 0.3423528272  | -0.2168900984 | 3.0931837954  |
| MG | -0.7804378972 | 2.5533193556  | 3.5474762483  |

#### Al3Mg17

|    |               |               |               |
|----|---------------|---------------|---------------|
| AL | -1.5554707329 | -1.8539104869 | -2.2924090251 |
| AL | -0.2596842403 | -0.3358062983 | -0.3174726087 |
| AL | 0.8549197232  | 2.0801909120  | -1.1747945286 |
| MG | -2.7348096478 | -1.9765199967 | 0.3259231943  |
| MG | -3.5331878438 | 0.0858640792  | -2.0096354963 |
| MG | -3.3616011893 | 0.9659571868  | 0.7836975406  |
| MG | -1.3859640294 | -0.3569515781 | 2.5833432470  |
| MG | -0.3182416390 | -3.0308364908 | 1.9073370552  |
| MG | -0.6593748071 | 2.2538543972  | 1.2958313610  |
| MG | -0.4650322797 | -3.9958188163 | -0.9240211451 |
| MG | -0.7377004324 | 0.6499894829  | -3.3462815329 |
| MG | -1.9955464788 | 2.5429872454  | -1.4196216660 |
| MG | 2.0567432086  | -2.8574968728 | 0.0707074224  |
| MG | 0.6688669364  | 1.5681833070  | 3.9925631681  |
| MG | 1.5933861982  | -0.5937099409 | 2.0286536942  |
| MG | 1.2838077576  | -1.8666359302 | -2.6431738406 |
| MG | 2.2277643631  | 0.8873527320  | -3.4004732187 |
| MG | 2.5160860946  | 2.3435194566  | 1.1910842841  |
| MG | 2.8782734581  | -0.0779858760 | -0.6483081399 |
| MG | 2.9267665807  | 3.5677744878  | 3.9970512348  |

#### Al4Mg16

|    |               |               |               |
|----|---------------|---------------|---------------|
| AL | -1.2912328412 | -2.4933765092 | 1.0394762863  |
| AL | -0.8328707795 | 1.8642113452  | 1.9798331935  |
| AL | -0.5512121257 | 1.2133105917  | -1.8524217096 |
| AL | 0.4999023254  | -0.1743102227 | 0.3090825599  |
| MG | -4.5590372579 | -2.2963929887 | -3.1167672421 |
| MG | -2.7646217358 | -0.1861829127 | 1.4236672526  |
| MG | -2.5470597328 | 2.2519890702  | -0.2452991389 |
| MG | -4.7154558031 | 4.4006972833  | -1.1519196693 |
| MG | -2.0358004188 | -1.1845451714 | -1.3732096791 |
| MG | -0.2097180521 | -0.6250596993 | 3.1526416821  |
| MG | 1.1119938547  | -3.1722227373 | 2.1906622291  |
| MG | 0.8361282656  | 2.9626694851  | -0.0026934634 |
| MG | 0.6179022597  | -2.8981846244 | -1.0080193003 |

|    |              |               |               |
|----|--------------|---------------|---------------|
| MG | 1.8346818230 | 2.1590112480  | 2.7619194415  |
| MG | 0.3117176115 | -0.9784941941 | -3.3445445545 |
| MG | 2.1164802787 | 1.7319144227  | -2.4595247154 |
| MG | 3.2509417281 | 1.0111819505  | 0.3307767661  |
| MG | 2.7827489410 | -0.5760750377 | 3.0091678928  |
| MG | 3.1546708868 | -2.0427641791 | 0.5145429108  |
| MG | 2.9898377723 | -0.9673771201 | -2.1573707421 |

#### Al5Mg15

|    |               |               |               |
|----|---------------|---------------|---------------|
| AL | -1.9861279064 | -0.5624242514 | -2.0169546261 |
| AL | -0.1026267684 | -0.4606537050 | 0.5232954912  |
| AL | 0.2480445320  | 1.3408400949  | -1.4343597959 |
| AL | 1.7164496143  | -2.6883986319 | -0.4675184103 |
| AL | 2.2344808969  | 1.6395777756  | 0.7910293779  |
| MG | -3.4790973721 | -0.9164002208 | 0.3430761898  |
| MG | -1.9885029441 | 0.6525088765  | 2.4836355685  |
| MG | -2.5317782837 | 1.7551278407  | -0.4503794652 |
| MG | -2.1804142046 | -2.5169775106 | 2.3665972788  |
| MG | -1.2144736345 | 1.3478552001  | -4.0648696423 |
| MG | -1.1847810374 | -2.9291665777 | -0.5613899638 |
| MG | -0.2943523456 | 2.9245167258  | 1.0374456867  |
| MG | 0.0623027576  | -1.3490098265 | 3.8583124047  |
| MG | 0.5716992683  | -1.4259923678 | -2.6984503701 |
| MG | 0.8758107405  | 1.3502998748  | 3.2376917922  |
| MG | 0.8796075502  | 3.3312846355  | -3.9456243523 |
| MG | 0.5937232477  | -3.5508990685 | 1.9069255543  |
| MG | 2.4971430706  | 3.3276453449  | -1.5542951576 |
| MG | 2.8524286584  | -0.2242811567 | -1.1843245729 |
| MG | 2.4304641603  | -1.0454530519 | 1.8301580124  |

#### Al6Mg14

|    |               |               |               |
|----|---------------|---------------|---------------|
| AL | -2.8804591866 | -0.7061439011 | 0.5731676490  |
| AL | 0.3386403945  | 3.2453622151  | -0.4225128333 |
| AL | -0.2862786196 | 0.2540376826  | -0.6645733668 |
| AL | -0.8138500489 | -0.1416306495 | 2.1759989977  |
| AL | 0.8198726005  | -2.3896529853 | -1.1155696722 |
| AL | 2.3343777502  | 1.4792515068  | -0.1223842705 |
| MG | -3.5501756511 | 0.9134007891  | -1.5607313525 |
| MG | -2.0455942730 | 2.1125312975  | 0.8014725034  |
| MG | -1.6567202555 | 0.5314191003  | -3.7844973119 |
| MG | -0.9724879834 | -2.7779251049 | 1.0037580953  |
| MG | -1.9023970694 | -1.8021966929 | -1.9461303626 |
| MG | 0.7976147515  | 2.1337289292  | 2.1701152270  |
| MG | 0.6167977333  | -1.2608347538 | -3.6861007548 |
| MG | 0.2738998214  | -4.1040984209 | 3.5539542962  |
| MG | -1.6782503030 | 3.0628276521  | -2.2510937769 |
| MG | 2.3326336973  | -1.8798067065 | 4.1981116263  |
| MG | 2.6337401828  | 1.2273985215  | 4.5499166097  |
| MG | 1.0371813762  | 1.7029095268  | -2.8298526047 |
| MG | 1.7403159187  | -0.9623524561 | 1.1908224619  |
| MG | 2.8611381641  | -0.6382275500 | -1.8338711601 |

#### Al7Mg13

|    |               |               |               |
|----|---------------|---------------|---------------|
| AL | -2.3631161708 | 1.1683131273  | 1.2279430131  |
| AL | -0.7181019102 | -1.8945734314 | -1.6978417003 |
| AL | -0.3698741021 | 2.6581649342  | -2.6418150643 |
| AL | -0.0712672674 | -0.4863781240 | 1.9699388798  |
| AL | 0.1944795123  | 0.5201388063  | -0.5982051165 |
| AL | 1.8410891670  | -1.7124358057 | 0.0742814223  |
| AL | 2.4085887051  | 0.8024552234  | 1.6343566797  |
| MG | -2.4918936991 | 0.7646366065  | -1.6126563075 |
| MG | -2.5116379732 | -1.5485903294 | 0.4740537275  |
| MG | -3.0051501965 | -0.4509098382 | 3.5781631307  |
| MG | -0.5050692334 | 0.0437497486  | -3.7767046064 |
| MG | -1.4417424473 | 3.3502922724  | -0.2492748618 |
| MG | -0.3883229031 | -3.6169592844 | 0.6333883083  |
| MG | 0.1420014358  | 2.4340026436  | 2.0857171494  |
| MG | -1.3678977847 | -2.8203730653 | 3.5041575940  |
| MG | 1.4594736712  | -2.9394731191 | 2.8039633707  |
| MG | 1.9090162023  | -1.3292087509 | -2.7267988725 |
| MG | 2.1234932288  | 1.6068837032  | -3.2581412693 |

|    |              |              |               |
|----|--------------|--------------|---------------|
| MG | 1.6804286839 | 2.9593786597 | -0.5232336991 |
| MG | 3.4755040813 | 0.4908880230 | -0.9012937779 |

Al8Mg12

|    |               |               |               |
|----|---------------|---------------|---------------|
| AL | -3.5041539784 | -0.9960765854 | 0.3012809279  |
| AL | -1.2946494353 | -1.1844330507 | -3.3139886974 |
| AL | -1.3807589894 | 2.6348905742  | -0.5786794543 |
| AL | -1.5564049274 | -0.6439901391 | 2.1999264501  |
| AL | 0.6665006545  | -2.0278947467 | 1.5444169593  |
| AL | 1.2093068266  | -0.4133290842 | -2.5736570621 |
| AL | 1.1764861313  | 2.0653628337  | -1.2716956084 |
| AL | -0.7265777481 | -0.2479948077 | -0.4622663338 |
| MG | -3.2279447160 | 0.6278620401  | -1.8486513312 |
| MG | -2.9530154280 | 1.6514712100  | 1.3562519012  |
| MG | -2.8148659649 | -2.7596384806 | -1.8127659107 |
| MG | -1.7415572399 | -3.2243456578 | 0.8358915242  |
| MG | -0.8200954219 | 1.5875096921  | -3.2077715391 |
| MG | 0.3770917181  | 1.4154327563  | 1.7038441944  |
| MG | 0.3713305295  | -2.7971775339 | -1.3241979785 |
| MG | 2.9423874977  | 2.0850572359  | 3.3157794859  |
| MG | 2.7501312286  | -0.9002543364 | 3.0810341563  |
| MG | 2.4976525060  | -0.4240700894 | -0.0563264050 |
| MG | 3.1848019580  | 2.8823976213  | 0.4498259730  |
| MG | 4.8443347989  | 0.6692185485  | 1.6617477481  |

Al9Mg11

|    |               |               |               |
|----|---------------|---------------|---------------|
| AL | -2.8525308139 | 3.0262017829  | 1.0132088673  |
| AL | -2.5384323371 | -1.6344278551 | 0.4483075453  |
| AL | -0.5597161707 | 1.4258327182  | 2.1979890903  |
| AL | -0.8492529327 | 2.3241975802  | -0.7253067444 |
| AL | 0.2458390954  | -0.3776938866 | -0.1484021027 |
| AL | -0.6145651608 | -3.3552843259 | 0.3334579015  |
| AL | 1.7876725237  | 0.1825717435  | 2.3161850023  |
| AL | 1.4466510161  | 1.7065005267  | -1.8646782663 |
| AL | 3.5470341776  | -2.2534349415 | -1.1787721187 |
| MG | -3.2061706508 | 0.5007542452  | 2.0467953852  |
| MG | -3.0706591262 | 0.7100762876  | -1.0448112001 |
| MG | -1.3429890502 | -1.8518483896 | -2.1681172370 |
| MG | -0.6777249038 | 4.5186470085  | 1.7460144121  |
| MG | -0.5369765165 | -1.4506808407 | 2.5750578444  |
| MG | -0.8551862548 | 0.8208054259  | -3.2231609596 |
| MG | 1.3797939169  | -3.8408125381 | -1.4317467546 |
| MG | 1.7097575939  | 2.6804060512  | 0.8550969287  |
| MG | 1.6168210015  | -0.9686065579 | -2.7976708794 |
| MG | 2.0966515448  | -2.4160778737 | 1.2340075473  |
| MG | 3.2739810477  | 0.2528738391  | -0.1834552616 |

Al10Mg10

|    |               |               |               |
|----|---------------|---------------|---------------|
| AL | -1.1017976977 | 1.1465828793  | -2.9954849152 |
| AL | 1.4975263837  | 0.7937514016  | -1.8261449787 |
| AL | -1.1149439701 | -0.9569628625 | -0.8811561064 |
| AL | -2.4340434967 | 1.4640816693  | -0.6287219012 |
| AL | 0.1369384945  | 0.8481469818  | 0.6595759845  |
| AL | -1.7643508916 | -3.9444096733 | -0.7032383862 |
| AL | 2.4217725361  | -0.6334009741 | 0.5689829716  |
| AL | -1.8028935656 | -2.4974239006 | 1.4342554210  |
| AL | -1.5340329679 | 2.9524031654  | 1.4772880936  |
| AL | 2.1720390619  | 1.2303126160  | 2.6797042603  |
| MG | -0.9152614958 | -1.3909420215 | -4.0178989046 |
| MG | -0.0427643337 | -3.8853611504 | -2.7617271084 |
| MG | 1.9432355849  | -1.8488929653 | -2.3685274955 |
| MG | 0.0002973076  | 3.1692324416  | -1.0573475325 |
| MG | 2.9249334634  | 2.3015611862  | 0.1032928173  |
| MG | 0.9636667884  | -3.0591751885 | 0.2587073100  |
| MG | 1.0791631115  | 3.7468827055  | 1.7649647358  |
| MG | -2.4735550678 | 0.1214335994  | 1.9515216794  |
| MG | 0.4019582430  | -1.1968959322 | 2.6878494003  |
| MG | -0.3578854882 | 1.6390760222  | 3.6541046551  |

Al11Mg9

|    |               |               |               |
|----|---------------|---------------|---------------|
| AL | -2.0336923230 | -3.0182009846 | -0.3822911206 |
| AL | -1.3115426246 | 1.2631727244  | -0.8313607282 |
| AL | 0.3475334674  | 3.5944382765  | 2.4753939728  |
| AL | -2.0382839770 | 1.2376101748  | -3.6120259708 |
| AL | -2.5097885450 | -0.7271501167 | 0.7060444660  |
| AL | 0.2722372092  | -3.5164925733 | -1.4978168231 |
| AL | 0.1654784200  | -3.3427301058 | 1.4181990620  |
| AL | 0.2235340592  | -0.9427041207 | -0.0286475066 |
| AL | 1.2105059966  | 0.9259908649  | -2.0638935136 |
| AL | 1.2054223960  | 1.7900487988  | 0.5624552142  |
| AL | 2.0038277253  | -0.9999681605 | 2.1792446909  |
| MG | -1.7171033199 | 1.6372829091  | 2.1249474511  |
| MG | -1.1067255415 | -1.2184922293 | -2.6883968626 |
| MG | -1.9758772073 | 3.8031703918  | -2.4964260699 |
| MG | -0.7970306722 | -1.2021528899 | 2.9858764690  |
| MG | -0.9121761026 | 4.2789170269  | 0.1570679312  |
| MG | 1.0411822318  | 1.1794362529  | 3.6042429724  |
| MG | 2.0046452124  | -1.6769210218 | -2.5235851360 |
| MG | 2.6714739821  | -2.9758789409 | 0.1333505299  |
| MG | 3.2563796130  | -0.0893772766 | -0.2223790279 |

Al12Mg8

|    |               |               |               |
|----|---------------|---------------|---------------|
| AL | -2.1877863394 | -0.5415603191 | 2.0805513755  |
| AL | -2.6148699353 | 3.1236938887  | -1.5798525217 |
| AL | -2.7740275135 | 1.1286448077  | 0.1732846557  |
| AL | -1.9819946848 | -1.4534316254 | -0.9903133138 |
| AL | -0.4799919678 | -2.3874855044 | 0.9722985578  |
| AL | -0.9193158456 | 4.0900737406  | -3.4297690645 |
| AL | -0.0545370275 | 0.3156212289  | 0.1664697592  |
| AL | 0.4893139053  | 2.0353485272  | -2.0176524584 |
| AL | 1.6610440957  | 2.5671028018  | 1.0446206665  |
| AL | 2.1196252070  | -1.6976951552 | -0.2267953434 |
| AL | 2.1061858724  | -2.9625202623 | 2.1727652811  |
| AL | 2.6166261206  | 0.8632078667  | -0.8445433547 |
| MG | -1.9796154570 | 0.6702788078  | -2.7453306103 |
| MG | 0.3646220558  | -3.7442405201 | -1.5189454545 |
| MG | -0.3268099645 | 1.5466934016  | 2.7806834212  |
| MG | -0.5709899193 | 3.8334420509  | 0.1265767154  |
| MG | 0.1085447143  | -1.3557679285 | 3.5454980802  |
| MG | 1.3996110920  | -5.2161838882 | 0.7382963290  |
| MG | 2.3454946840  | 0.0413725045  | 2.0710509295  |
| MG | 0.6788719076  | -0.8565934230 | -2.5188936498 |

Al13Mg7

|    |               |               |               |
|----|---------------|---------------|---------------|
| AL | -2.8971197975 | -0.0407359589 | 0.5878318057  |
| AL | -1.7022821295 | 3.4047897546  | -1.4503077417 |
| AL | -0.8796565424 | 1.7990581439  | 0.8717720764  |
| AL | -2.4935215796 | -2.0134152978 | -1.1583008435 |
| AL | -1.0486870997 | -0.3752393086 | 2.6234431815  |
| AL | 1.0081310285  | -0.1141582537 | -3.0446728081 |
| AL | -0.0539899443 | -0.8080018102 | -0.1344645177 |
| AL | 1.4886287480  | -3.3835749012 | 1.1085492672  |
| AL | 0.5128310748  | 3.8028112336  | 2.5331463632  |
| AL | 0.6498180111  | 1.4494168901  | 3.4592811920  |
| AL | 1.6024114706  | -2.5213114229 | -1.6681186268 |
| AL | 1.0890187605  | 1.9618313399  | -1.5338805733 |
| AL | 2.6145826943  | -0.2958275994 | -0.6338686673 |
| MG | -1.8190865047 | 0.7062252701  | -2.1763163926 |
| MG | -1.5538906350 | -2.7996538213 | 1.5053319238  |
| MG | -0.8037533000 | -2.1060404577 | -3.2764242339 |
| MG | -0.5291435922 | -4.0564196606 | -0.8311889019 |
| MG | 0.5088641528  | 4.4075867418  | -0.1239604392 |
| MG | 1.9753230742  | -0.9488465496 | 2.2487422852  |
| MG | 2.3315211103  | 1.9315076677  | 1.0934056512  |

Al14Mg6

|    |               |               |               |
|----|---------------|---------------|---------------|
| AL | 0.3800397128  | -0.5011633013 | -3.6614332616 |
| AL | -0.1352003210 | 2.1720794700  | -2.7667789540 |
| AL | -0.6069633402 | -0.1796923605 | -0.8156788498 |
| AL | 1.9644984551  | 0.9734448964  | -1.6257585491 |
| AL | 0.2984664472  | -2.4681946998 | 0.6107009653  |



|    |               |               |               |
|----|---------------|---------------|---------------|
| AL | -1.6134043786 | 1.8662861991  | 1.4716220576  |
| AL | -2.2277760702 | -2.5513631830 | -0.2669814359 |
| AL | 3.0344574526  | -2.1812240176 | 0.6375420104  |
| AL | 1.5008093790  | 0.4251283930  | 0.9144429423  |
| AL | -3.3154426030 | -0.0197291658 | 0.4581837415  |
| AL | 2.8226200642  | 1.6540066350  | 3.1030970027  |
| AL | 1.1234692189  | -1.5117886058 | 3.1995836302  |
| AL | 0.1927602089  | 1.4037809843  | 3.4731533430  |
| AL | 3.6636731397  | -0.8280869789 | 2.7397678468  |
| MG | -2.0526084015 | 0.7463827628  | -4.2302990655 |
| MG | -3.2152128125 | -1.0340440874 | -2.3360826371 |
| MG | 1.8048888124  | -1.9786230522 | -1.8861504390 |
| MG | -2.5342589613 | 1.9725499503  | -1.3261010725 |
| MG | 0.4176493922  | 2.9587307326  | -0.0175255679 |
| MG | -1.5024653947 | -0.9184795712 | 2.3246962928  |

#### Al15Mg5

|    |               |               |               |
|----|---------------|---------------|---------------|
| AL | -3.0025185333 | -1.2350334519 | 1.8268995985  |
| AL | -2.0135412216 | 1.4059145689  | 1.9598835029  |
| AL | -1.7358557107 | 1.6785574552  | -2.9520751575 |
| AL | -1.2543070180 | -1.1970103972 | -2.7907659295 |
| AL | -0.8398133515 | -0.2144206084 | 3.7673066972  |
| AL | -0.9884503364 | -2.9072227390 | 2.6492918017  |
| AL | -0.2204639785 | -0.6873080646 | 1.0746483881  |
| AL | 0.8267432967  | 0.1825837244  | -3.8328684203 |
| AL | 0.3402836119  | 0.4951637638  | -1.1091906457 |
| AL | 0.9617876910  | 1.6963895720  | 1.8805895504  |
| AL | 0.6424932840  | 2.8424902061  | -2.6271770247 |
| AL | 1.0910700596  | -2.2001853059 | -1.1655379773 |
| AL | 1.9943863466  | -0.6233514734 | 3.3080826378  |
| AL | 2.6687383931  | -0.2990270455 | 0.3331248581  |
| AL | 3.1380336866  | 0.7576686107  | -2.3991296830 |
| MG | -2.8017501074 | 0.3010191795  | -0.6493686755 |
| MG | -1.7339716739 | -2.6824620255 | -0.3998890794 |
| MG | -0.9553015321 | 2.8866442618  | -0.1236359968 |
| MG | 1.5923768466  | -2.9313205519 | 1.6487310556  |
| MG | 2.2900612470  | 2.7309103211  | -0.3989205007 |

#### Al16Mg4

|    |               |               |               |
|----|---------------|---------------|---------------|
| AL | -3.7974997269 | -0.3029190900 | 0.2959804023  |
| AL | -2.4912857906 | -2.9850338631 | 0.2064691184  |
| AL | -1.7628383437 | 1.6532343918  | 1.1315242424  |
| AL | -2.0688651964 | -1.0410847650 | 2.2064735663  |
| AL | -0.7268751665 | -0.7214893433 | -0.3750038569 |
| AL | -0.0681502279 | 3.5202181813  | 1.9552419817  |
| AL | 0.5068235652  | -2.9605343936 | -2.0516054581 |
| AL | -0.0129443350 | 1.8419041844  | -1.8637754907 |
| AL | 1.6144455403  | 3.6127977520  | -0.1359680893 |
| AL | 0.9832793545  | 1.0272303252  | 0.6150826541  |
| AL | 0.1254731575  | -3.1928037679 | 0.6307002219  |
| AL | 0.5561874633  | -0.9930777670 | 2.3799498266  |
| AL | 1.8694560187  | -0.2860223054 | -1.8965548815 |
| AL | 1.8545201963  | 2.0524984394  | 3.0806449964  |
| AL | 3.4364401726  | 1.7268630255  | -0.9432591558 |
| AL | 3.5613305060  | 0.4425787158  | 1.8275262766  |
| MG | -2.9317798597 | -1.9328342559 | -2.2560299801 |
| MG | -2.6986749857 | 1.0500781562  | -1.8537162032 |
| MG | -0.5870137028 | -0.6745092260 | -3.3979182869 |
| MG | 2.6379703608  | -1.8370963944 | 0.4442411158  |

#### Al17Mg3

|    |               |               |               |
|----|---------------|---------------|---------------|
| AL | -2.1691078381 | -0.1133942446 | -3.1011274908 |
| AL | -0.4173793270 | 2.5858979329  | -2.8171897439 |
| AL | -0.8808909931 | 0.6429733462  | -0.7852224989 |
| AL | 2.0057704274  | -1.0399769295 | -1.3025896325 |
| AL | 1.6294925219  | 1.7574792996  | -0.8917483688 |
| AL | -3.1648650310 | -1.3217687005 | -0.6184978244 |
| AL | -3.5278392660 | 1.3774027235  | -1.1330463903 |
| AL | 1.1272817386  | -3.4801279002 | 0.3659570017  |
| AL | -1.8217054362 | 3.4715521444  | -0.7057172763 |
| AL | 3.9416402838  | 0.8615150658  | 0.7380308934  |

|    |               |               |               |
|----|---------------|---------------|---------------|
| AL | 0.4909940629  | -0.3699292062 | 1.1265497345  |
| AL | -2.5232852208 | 0.4370139748  | 1.5347445664  |
| AL | 3.0460893424  | -1.7813532666 | 1.1312657736  |
| AL | 1.7512819903  | 1.9779502101  | 2.1741455122  |
| AL | 0.7023237890  | -2.4747307796 | 3.0782277809  |
| AL | -0.8047555113 | 2.5146349014  | 1.5698137415  |
| AL | 2.2097144824  | -0.3300077062 | 3.3351762131  |
| MG | 0.6616774749  | 0.0373795736  | -3.4534004971 |
| MG | -0.6713099112 | -2.2915391587 | -1.6597992260 |
| MG | -1.5851285789 | -2.4609722804 | 1.4144287317  |

#### Al18Mg2

|    |               |               |               |
|----|---------------|---------------|---------------|
| AL | -3.5133135855 | 0.4669993079  | 1.3710395339  |
| AL | -2.9941791359 | 3.0433698280  | 0.5188766287  |
| AL | -1.3774900843 | 3.0973639089  | -1.7217167878 |
| AL | -1.5627599691 | 0.8628192845  | 3.0995184885  |
| AL | -1.1510274363 | -1.2250107837 | -1.8274605473 |
| AL | -2.2755294827 | -1.8000452339 | 0.6519474040  |
| AL | -0.3748576276 | -3.6951102990 | 0.1497202769  |
| AL | -0.7093827026 | 0.8951186822  | 0.2655261576  |
| AL | 0.6080692387  | 3.5247123999  | -0.0412159047 |
| AL | 0.4848277878  | 2.5887430579  | 2.5298128262  |
| AL | 0.0678570443  | 1.0941604064  | -2.7642453834 |
| AL | 1.8376680137  | -0.9626369993 | -3.0781593446 |
| AL | 0.9298876633  | -0.2608605370 | 2.4764752990  |
| AL | 1.4199575603  | -2.9079304395 | 1.9588451109  |
| AL | 1.0746025316  | -1.1430160272 | -0.2273260173 |
| AL | 0.8706761310  | -3.2542817247 | -2.1531747277 |
| AL | 2.2237639148  | 1.3273330331  | 0.5986433744  |
| AL | 3.5820991348  | -0.2456084918 | -1.1927698397 |
| MG | -3.0924185228 | 0.7692055825  | -1.4863929112 |
| MG | 3.9515495266  | -2.1753239553 | 0.8720553636  |

#### Al19Mg1

|    |               |               |               |
|----|---------------|---------------|---------------|
| AL | -3.4915947064 | 1.2171349482  | -1.2551500597 |
| AL | -3.1857227879 | 1.6645311070  | 1.3585746872  |
| AL | -2.8099873635 | -0.5742788393 | 2.6488556015  |
| AL | -2.6562808403 | -0.8904694262 | -2.6855291587 |
| AL | -2.1787371352 | -2.8801561426 | 1.4885993428  |
| AL | -2.2614717518 | -2.9846584093 | -1.1412531578 |
| AL | -1.6458490666 | -0.4505072464 | 0.0251485491  |
| AL | -0.4620689445 | 1.0797161260  | 2.2926951596  |
| AL | 1.5221391633  | 2.5628775687  | -1.8062995071 |
| AL | 0.3418053044  | -1.8148514464 | 1.8517159866  |
| AL | -0.3687338728 | 0.5923381125  | -2.5005491602 |
| AL | 0.3210557075  | -2.1367151475 | -1.5634556611 |
| AL | 1.0717733188  | 0.1822901302  | -0.0133359782 |
| AL | 1.8241067705  | 2.7899086630  | 0.8622741022  |
| AL | 2.2439607088  | 0.9998083744  | 2.8848024405  |
| AL | 2.6133425162  | 0.2072581207  | -2.4914748641 |
| AL | 3.0487132832  | -1.2065088148 | 1.4528704185  |
| AL | 3.0068287848  | -2.1074378350 | -1.0695869929 |
| AL | 4.0081377947  | 1.1343880745  | -0.0910914414 |
| MG | -0.9414148831 | 2.6153320824  | -0.2478093068 |

#### Al20Mg0

|    |               |               |               |
|----|---------------|---------------|---------------|
| AL | -3.3466315032 | 1.2979271387  | -0.2585924428 |
| AL | -3.8113041080 | -1.4790515544 | -0.3940410698 |
| AL | -2.9289265345 | 0.5546251402  | 2.3276247611  |
| AL | -1.7654020846 | -1.9386692253 | -2.3192551352 |
| AL | -2.1547651087 | -2.0717874247 | 1.8424112798  |
| AL | -2.4737245562 | 0.7189872262  | -2.7723075592 |
| AL | -1.0310441255 | -3.5645855998 | -0.1937923982 |
| AL | -1.0287100088 | -0.3181881716 | -0.0995655652 |
| AL | -0.8292132380 | 2.5067348611  | -0.0364479747 |
| AL | -0.2166398481 | 0.7400006772  | 2.5058817821  |
| AL | 1.0079224349  | -1.8510172660 | -1.4401210644 |
| AL | 1.6554702055  | 3.5175357898  | 0.1955973001  |
| AL | 1.7096382387  | 0.6725319961  | 0.1724482299  |
| AL | 0.7206850918  | -1.8931395268 | 1.5317632439  |
| AL | 0.2385004165  | 0.8161617951  | -2.4717977350 |

|    |              |               |               |
|----|--------------|---------------|---------------|
| AL | 2.1658821576 | 2.1726098145  | 2.4301911513  |
| AL | 2.7261547880 | -0.3965131059 | 2.6916943866  |
| AL | 2.5775289138 | 2.2147395029  | -1.9314202856 |
| AL | 3.2038099132 | -0.3425562794 | -2.1177934226 |
| AL | 3.5807689559 | -1.3563447878 | 0.3375225180  |

25

Al0Mg25

|    |               |               |               |
|----|---------------|---------------|---------------|
| MG | -0.1571098007 | -0.3114809545 | -2.9522419488 |
| MG | 2.7721157816  | -0.0953007152 | -2.0299196273 |
| MG | -3.0461362059 | -0.3828296944 | -1.8760637811 |
| MG | -1.8669779882 | 2.1201895538  | -3.2371987865 |
| MG | 1.4629198747  | -2.8297219442 | -2.9024098688 |
| MG | 1.0820661590  | 2.3897903918  | -2.1799181684 |
| MG | -1.3660782472 | -2.8535133388 | -1.6352200707 |
| MG | -1.2898704174 | 4.3864890982  | -1.4638159392 |
| MG | 3.6620458003  | -2.9626366087 | -0.9640016794 |
| MG | 1.0452416315  | -4.5952775069 | -0.5913549021 |
| MG | -2.7548932379 | -1.7469125690 | 0.7490844631  |
| MG | -3.7842205854 | 2.5926189612  | -1.0507072059 |
| MG | 3.0851388304  | 2.0619862047  | 0.0049971292  |
| MG | -0.8877030706 | 1.1269967542  | -0.0832214648 |
| MG | 0.5633885745  | 3.7152546816  | 0.8062132863  |
| MG | 0.7285539828  | -1.2067281902 | 0.0632370827  |
| MG | -2.4893630361 | 4.0578207798  | 1.2764511568  |
| MG | 3.6030480651  | -0.8047553356 | 1.1156253831  |
| MG | 2.6945704583  | -3.7119737076 | 1.7825270801  |
| MG | -0.3895346737 | -3.4416521068 | 1.8063573711  |
| MG | -3.4451100045 | 1.1519830369  | 1.5912351795  |
| MG | 1.4223457294  | 1.1045278763  | 2.2374066476  |
| MG | -1.0821406048 | 2.4190552868  | 3.2188341280  |
| MG | 1.5827062392  | -1.6202961811 | 3.4591688083  |
| MG | -1.1450002544 | -0.5636357722 | 2.8549337272  |

25

Al1Mg24

|    |               |               |               |
|----|---------------|---------------|---------------|
| AL | 1.2540221580  | -0.3879522827 | -0.3822325996 |
| MG | -4.8444148363 | 0.8097127056  | -0.0407535079 |
| MG | -3.3898108131 | -1.8339515208 | 0.6196486070  |
| MG | -3.3871374043 | -0.4234550783 | -2.1861824594 |
| MG | -3.9571969209 | 0.1742601590  | 2.7462015178  |
| MG | -3.4679115829 | 3.0174427798  | 1.4424364042  |
| MG | -2.6624228668 | 2.5261954087  | -1.3847833156 |
| MG | -1.2547704885 | 0.3923438108  | 0.3451997926  |
| MG | -1.0739346780 | -2.2382328321 | -1.5753558861 |
| MG | -0.3295424789 | 3.3552182573  | 1.0378689418  |
| MG | -0.7140645907 | -3.3829536092 | 1.0870871303  |
| MG | -0.6199666680 | 0.5153900180  | -2.8859483074 |
| MG | -1.1075042706 | -1.2085120353 | 3.0981320846  |
| MG | -1.6769497658 | 1.8503879953  | 3.4190141956  |
| MG | 1.0556351979  | 0.9678599293  | 2.5239144106  |
| MG | 1.7207291367  | -3.3127830825 | -0.8813856194 |
| MG | 0.3867852287  | 3.0455912605  | -1.8419057382 |
| MG | 1.0862200451  | -1.8669599210 | -3.6672269374 |
| MG | 1.6686904565  | -1.9893461279 | 2.2001901128  |
| MG | 2.4235191869  | 2.3981010709  | 0.2216530803  |
| MG | 2.4317572156  | 0.8993437264  | -2.8124842326 |
| MG | 3.8783389176  | 0.2340000973  | 1.9552261037  |
| MG | 4.6412733374  | 0.5163804394  | -0.8727980220 |
| MG | 3.7621120106  | -1.8121090954 | -2.5563746725 |
| MG | 4.1765454737  | -2.2459730733 | 0.3908609167  |

25

Al2Mg23

|    |               |               |               |
|----|---------------|---------------|---------------|
| AL | -0.8655723592 | -0.5496213198 | -2.3635283276 |
| AL | 0.3522139984  | -1.4658997654 | -0.0359138602 |
| MG | -0.2017318812 | 1.9698889113  | -3.5791849420 |
| MG | 1.9231577690  | 0.0472536995  | -2.2954016914 |
| MG | -1.1127167074 | -3.6041760307 | -2.1405287269 |
| MG | 2.0478748731  | 3.0829835946  | -2.1507965747 |
| MG | -3.3256222357 | -1.6526784746 | -1.5495737600 |
| MG | -2.7245150053 | 1.6285333425  | -1.8997882022 |
| MG | 1.8762740372  | -3.5375589646 | -1.7593123134 |
| MG | -0.8065403258 | 4.0414105218  | -1.4175492735 |
| MG | 3.6727490612  | -1.5830640049 | -0.3781628987 |
| MG | 0.0103884173  | -4.9556293257 | 0.1894345951  |

|    |               |               |               |
|----|---------------|---------------|---------------|
| MG | 2.9589124371  | 1.2912391568  | 0.3009587189  |
| MG | -2.1148594957 | -3.0142905887 | 0.8778268859  |
| MG | 1.6854627594  | 4.1046654179  | 0.5628479858  |
| MG | -0.1851757363 | 1.2992774697  | -0.0053879143 |
| MG | -2.9512087673 | 0.0431108632  | 0.8294094125  |
| MG | -3.1345306497 | 3.2776394581  | 0.4671829898  |
| MG | 2.7576394149  | -3.9582470681 | 1.0739255129  |
| MG | -0.6835536151 | -0.5646979601 | 2.7554866957  |
| MG | -0.8517183733 | 4.4978660269  | 1.7754337670  |
| MG | 2.2558026677  | -0.9214811819 | 2.2895705684  |
| MG | 0.3507029486  | -3.4581967778 | 2.6945566783  |
| MG | 1.0869787623  | 1.9197738990  | 2.7574645307  |
| MG | -2.0204139941 | 2.0618981010  | 3.0010291437  |

25

Al3Mg22

|    |               |               |               |
|----|---------------|---------------|---------------|
| AL | 0.9464388937  | 0.9000199195  | -1.0850472072 |
| AL | 0.2146352083  | -1.4344512180 | 0.0971153519  |
| AL | -0.9821853267 | 0.8344085199  | 0.7576106417  |
| MG | 0.3767514554  | 0.3906480180  | -3.8052697956 |
| MG | -1.6247190510 | 2.1176201818  | -1.9253914050 |
| MG | 3.2537094144  | -0.2416991754 | -3.0223265060 |
| MG | 1.0687073973  | -2.2979958193 | -2.6400430983 |
| MG | 2.8317835471  | 2.6959123351  | -3.2083517105 |
| MG | -1.9697174206 | -0.7793528733 | -2.0641480146 |
| MG | -1.3788692696 | -3.6143309746 | -1.2527151729 |
| MG | -1.4372531470 | 3.8895992196  | 0.5648316144  |
| MG | 1.3635654794  | -4.4563911104 | -0.3912182686 |
| MG | 0.8144991994  | 4.0825354230  | -1.5856219528 |
| MG | 3.1126323451  | -1.8572611552 | -0.4716670746 |
| MG | -3.7091570161 | 1.1047854663  | 0.1813733746  |
| MG | 3.6609727588  | 1.1032090042  | -0.3154958332 |
| MG | -2.7550097526 | -1.8014527055 | 0.8641394364  |
| MG | 1.3393358037  | 2.7450606219  | 1.2088236796  |
| MG | -0.8812111382 | -4.1274233254 | 1.6561113392  |
| MG | -3.4085215927 | 3.0669738308  | 2.6161319993  |
| MG | 2.0231450673  | 0.0656865565  | 2.1678904576  |
| MG | 1.8285026549  | -2.9418112464 | 2.1456643722  |
| MG | -3.3093768101 | 0.1803788521  | 3.0901114999  |
| MG | -0.7046751585 | -1.3709689605 | 3.0285715761  |
| MG | -0.6739835418 | 1.7463006153  | 3.3889196967  |

25

Al4Mg21

|    |               |               |               |
|----|---------------|---------------|---------------|
| AL | -1.6591331445 | 0.8172817411  | -1.0712433074 |
| AL | 1.0034718372  | 0.1742564024  | -0.4466938274 |
| AL | -1.1912678481 | -1.9745993761 | -0.8480761942 |
| AL | -1.0178093171 | -0.1387639116 | 1.4838830645  |
| MG | -2.4031062992 | 1.7458073753  | -3.9593186634 |
| MG | 2.6088613538  | -0.2722089637 | -2.9233396604 |
| MG | 0.5902307848  | 1.6828969039  | -4.2529564651 |
| MG | -0.3995771333 | -0.8528751306 | -3.2853652723 |
| MG | 2.6825446297  | 2.7328124491  | -2.3730268967 |
| MG | -0.2024035637 | 3.2040989275  | -1.8067130916 |
| MG | 4.3903413297  | 1.0584206826  | -0.7265413793 |
| MG | -3.9645709202 | -0.4363514344 | 0.3108946981  |
| MG | 1.3547778169  | -2.8652204484 | -1.7031203442 |
| MG | -4.6597840882 | 0.8493587276  | -2.3309188175 |
| MG | 3.6826755042  | -1.8078299689 | -0.3420016830 |
| MG | -2.3625054338 | -3.4912048522 | 1.2027770790  |
| MG | 1.9465387073  | 2.8287658837  | 0.5468354283  |
| MG | -3.5301543403 | -1.4426929742 | 3.0529718829  |
| MG | 1.0495065032  | -2.2613584113 | 1.3002440635  |
| MG | -1.0816653877 | 2.7494238938  | 1.0327224693  |
| MG | 3.0845047594  | 0.1521918292  | 1.8184500204  |
| MG | -0.9244612334 | -2.9638854930 | 3.7177526324  |
| MG | 0.8230691569  | 1.6801822152  | 3.0618141541  |
| MG | -1.2819848627 | -0.0107867528 | 4.4650961787  |
| MG | 1.4619021893  | -1.1577203141 | 4.0758739315  |

25

Al5Mg20

|    |               |               |               |
|----|---------------|---------------|---------------|
| AL | -0.3293159176 | -0.9383441478 | -1.0397331916 |
| AL | -0.2914329859 | 2.9870674380  | -0.6209845358 |
| AL | -1.0450252153 | -3.1453852179 | -2.9452469068 |
| AL | -0.4084557639 | 0.5936309525  | 1.1284883916  |
| AL | 1.7267382345  | 0.9312735444  | -0.6910676546 |

|    |               |               |               |
|----|---------------|---------------|---------------|
| MG | -3.9805273271 | -0.9338215795 | 0.4502721689  |
| MG | -2.4184390476 | 1.1139594253  | -1.2859231842 |
| MG | -3.1588798815 | 1.5530630189  | 1.8087345884  |
| MG | -3.3780316107 | -1.7415711906 | -2.3167220176 |
| MG | -1.9687084952 | -3.1378193436 | -0.0164152352 |
| MG | -2.0480941215 | -1.3865772586 | 2.6364199321  |
| MG | -1.5917462161 | 1.4555121681  | 4.2762057590  |
| MG | 0.2652797078  | 1.5548510548  | -3.0246246153 |
| MG | -1.3311437890 | -0.5858369046 | -4.1153065215 |
| MG | -0.7878438254 | 3.4582984581  | 2.1533611696  |
| MG | 0.9159810005  | -3.7871852251 | -1.2434629241 |
| MG | 0.6592114113  | -2.3669660402 | 1.5345610379  |
| MG | 0.4982314463  | -0.6744900226 | 4.0733791231  |
| MG | 1.3246333069  | 2.1206889862  | 3.8348730506  |
| MG | 4.3778696705  | 2.4130767451  | -0.8366928940 |
| MG | 1.5151265229  | -1.4400003662 | -3.4190115071 |
| MG | 2.1089843121  | 3.2131096440  | 1.1533719784  |
| MG | 2.5627218360  | 0.0803523534  | 1.9561643092  |
| MG | 2.8471287163  | -1.6677170756 | -0.5265578704 |
| MG | 3.9357370317  | 0.3308315833  | -2.9240814503 |

25

Al6Mg19

|    |               |               |               |
|----|---------------|---------------|---------------|
| AL | 0.4850438290  | 1.5108386904  | -0.6120942235 |
| AL | 1.2072345315  | -1.3585182986 | -0.3383763992 |
| AL | -2.2470256031 | -2.3652956956 | -1.0386011054 |
| AL | -1.0950550209 | -0.1517170136 | 0.8130592496  |
| AL | 3.0124030799  | 0.4995473992  | 0.6126944364  |
| AL | -0.0963066504 | -2.5329283263 | 1.8486647018  |
| MG | 1.5843163922  | -1.0269365867 | -4.0876026733 |
| MG | 1.9294231666  | 1.7906258217  | -3.0371392687 |
| MG | -0.9330398521 | -0.2266570625 | -2.4458444821 |
| MG | -0.3783794336 | -3.1027280618 | -3.1920414856 |
| MG | -2.2609548421 | 2.2067073169  | -1.3928856996 |
| MG | 0.0036563067  | -4.1285508164 | -0.4549392231 |
| MG | 4.0552598219  | 2.5342973215  | -0.9223601906 |
| MG | -3.8054290024 | -0.1994776439 | -0.1574112915 |
| MG | 1.7823179067  | 4.2091142713  | -0.6950839973 |
| MG | 2.3715248827  | -3.3212145458 | -2.2686330641 |
| MG | -0.7137305889 | 3.7292225635  | 1.0462813204  |
| MG | 3.6871145005  | -0.5602146004 | -1.9461011608 |
| MG | -3.2281762227 | 2.3165029466  | 1.3988785818  |
| MG | -2.9326201120 | -2.6387360983 | 1.6650861003  |
| MG | -3.6372919163 | -0.0693108534 | 3.0272465133  |
| MG | 1.8789500266  | 2.6859979311  | 1.9264368126  |
| MG | -0.9144327704 | 1.6738268786  | 3.3109228457  |
| MG | 1.4121832813  | -0.2519650558 | 2.8583025007  |
| MG | -1.1669867107 | -1.2224294817 | 4.0815392020  |

25

Al7Mg18

|    |               |               |               |
|----|---------------|---------------|---------------|
| AL | -3.3013725283 | 2.2084953682  | 0.7522949979  |
| AL | -1.4564145973 | -1.7426653215 | -1.5036115285 |
| AL | 0.3956937701  | 3.3440436452  | -2.3788362089 |
| AL | -0.2579509865 | -2.5074814374 | 2.9049917299  |
| AL | -0.3666139115 | 1.6248464265  | 1.6223491477  |
| AL | -0.2638748793 | 0.7901455090  | -1.1664951209 |
| AL | 0.8119023960  | -0.8613952453 | 0.6305345546  |
| MG | -3.6207284958 | 0.1305869409  | -1.1264656414 |
| MG | -2.1051578920 | -0.7244555972 | 1.3899454375  |
| MG | -2.5525795024 | 2.6578800302  | -2.2812775443 |
| MG | -2.9421054108 | 1.7417811607  | 3.4158278495  |
| MG | -2.3715671646 | 0.0518274750  | -3.7848016790 |
| MG | 0.5037139571  | -1.0607356591 | -3.6004388831 |
| MG | -1.1496350749 | -3.5718995344 | 0.5387170312  |
| MG | -1.0414639445 | 3.8090395834  | -0.0378993187 |
| MG | -0.3840354486 | -0.0118309757 | 4.0152730739  |
| MG | 1.2621394553  | -3.0182379688 | -1.4316260935 |
| MG | 1.6856038798  | -4.0505098922 | 1.4684796590  |
| MG | -0.0823175140 | 1.7548491474  | -4.4924410548 |
| MG | 2.0272268645  | 2.3527759015  | -0.0796123456 |
| MG | 2.5583222068  | -1.5941612142 | 2.9771980503  |
| MG | 2.1066365820  | 1.3493405035  | 2.8226300460  |
| MG | 2.7632347429  | -0.3647817757 | -1.7338569987 |
| MG | 3.9577983484  | 0.2497691714  | 0.8565713156  |
| MG | 3.8235451476  | -2.5572262416 | 0.2225495244  |

25

Al8Mg17

|    |               |               |               |
|----|---------------|---------------|---------------|
| AL | -1.4047796297 | -1.6269728220 | -0.8480841771 |
| AL | -1.9263466138 | -0.0409700493 | 3.9107882277  |
| AL | -2.6932546588 | 2.1725206897  | 0.1752557549  |
| AL | 0.8011112434  | -2.7115431127 | -1.8908221947 |
| AL | -0.1368743677 | 2.7491709534  | -0.2073994330 |
| AL | -0.6241957216 | 0.1860198993  | 1.2801076093  |
| AL | 1.0975727554  | 0.0300142445  | -0.6519228978 |
| AL | 3.9448402848  | 0.7628679349  | 0.4256631917  |
| MG | -3.9903705337 | -0.3730437619 | -0.6289401960 |
| MG | -2.5686711023 | -1.9084062135 | 1.8209145131  |
| MG | -3.9094358870 | 0.8375141016  | 2.2050456519  |
| MG | -3.7088675047 | -1.4591847806 | -3.5494387887 |
| MG | -1.3588528800 | 2.6245079042  | 2.6946210301  |
| MG | -0.6768419302 | -1.2155716207 | -3.9850502266 |
| MG | -1.5670508323 | 1.0324843073  | -2.1613358587 |
| MG | -0.0158017684 | -1.9585300847 | 3.6222737040  |
| MG | 0.5486003537  | -2.8899031824 | 0.9426515781  |
| MG | 0.6886429450  | 0.9365429040  | 4.2427958178  |
| MG | 1.1560466040  | 1.2803613792  | -3.4662370646 |
| MG | 2.4369261431  | -1.5154278823 | -3.6786577241 |
| MG | 1.8181304484  | 2.2473919558  | 1.8600461953  |
| MG | 2.4834695754  | 2.7716724378  | -1.1628347273 |
| MG | 3.3252612723  | -1.8309273139 | -0.7168127650 |
| MG | 2.3437652852  | -0.7437067850 | 2.2007224786  |
| MG | 3.9369765195  | 0.6431188976  | -2.4333496990 |

25

Al9Mg16

|    |               |               |               |
|----|---------------|---------------|---------------|
| AL | -3.4409459184 | 1.0948755528  | -1.6376580706 |
| AL | -2.1630623622 | -1.2801301133 | -0.4150369190 |
| AL | -0.7480403787 | 0.9332536278  | 0.5979966621  |
| AL | -1.3728556387 | 3.5684128945  | 1.4788540229  |
| AL | 0.9180263146  | 1.4686692908  | -1.8841241911 |
| AL | 0.3415929306  | 2.3541834825  | 3.2513914057  |
| AL | 0.8694777151  | -0.9611121029 | -0.2936282304 |
| AL | 2.0204486287  | -2.1703761830 | 2.4231289020  |
| AL | 3.1028150774  | 1.1577288375  | -0.3395933626 |
| MG | -2.9058321241 | -0.8247776689 | 2.2614104893  |
| MG | -3.8131898291 | 1.8879009405  | 0.9288558339  |
| MG | -2.2129094310 | -1.2682812124 | -3.2178502685 |
| MG | -2.3336122957 | 1.6916786081  | 3.5050118760  |
| MG | -1.4076621625 | 1.5433595528  | -3.5630868623 |
| MG | -0.1196466820 | -0.4901487689 | 3.4756440960  |
| MG | -0.6638228565 | -2.8052371800 | 1.5584592941  |
| MG | -0.4278575596 | -3.2582444992 | -1.6321502238 |
| MG | 0.6463605318  | -0.9434210270 | -3.6478731809 |
| MG | -1.4457080845 | 3.3591973596  | -1.2591670960 |
| MG | 1.3006757753  | 3.0771746136  | 0.6247001132  |
| MG | 1.8002686723  | -4.0194812400 | 0.3174556307  |
| MG | 3.3422935595  | -0.2045577742 | -2.7289496827 |
| MG | 2.5087907691  | -2.9382446128 | -2.2938286226 |
| MG | 2.4714297250  | 0.6250803569  | 2.3024640417  |
| MG | 3.7329656235  | -1.5975007347 | 0.1875753429  |

25

Al10Mg15

|    |               |               |               |
|----|---------------|---------------|---------------|
| AL | -2.5905142262 | 0.9329855263  | -0.2421929147 |
| AL | -1.4776397290 | -1.6460547252 | 3.1877879345  |
| AL | -1.1079753925 | -3.4580427991 | -1.3405294205 |
| AL | -1.0412760962 | 0.8546099129  | 3.9902176726  |
| AL | 0.3697838937  | -0.7900943163 | -1.0048659144 |
| AL | -1.5508548936 | 3.5750024716  | -0.5213739038 |
| AL | -0.1610670400 | 0.4180598591  | 1.2422095562  |
| AL | 1.5602351919  | -3.7353177127 | -0.9730164601 |
| AL | 2.6968633309  | 1.0307363613  | 1.9893508300  |
| AL | 2.1179946150  | 0.3087571553  | -3.3725316249 |
| MG | -2.4568076868 | -1.8475723677 | 0.5238921312  |
| MG | -3.3091117119 | 0.3658678864  | 2.4104061999  |
| MG | -2.1733114261 | -0.9958766668 | -2.5339158298 |
| MG | -1.6389765333 | 2.9673210346  | 2.1691195685  |
| MG | -2.2558245401 | 2.0891704688  | -2.8047513910 |
| MG | 0.4228947571  | -2.2720264481 | -3.4239999882 |
| MG | 1.1072421787  | 3.1074961190  | 0.7580923915  |
| MG | -0.4353548812 | 0.5104200964  | -4.4375076587 |

|    |              |               |               |
|----|--------------|---------------|---------------|
| MG | 0.1172904351 | -3.1283222403 | 1.3885363474  |
| MG | 1.2115401574 | -0.8187842308 | 3.5795858787  |
| MG | 1.1495856100 | 2.4957684060  | 3.7274971061  |
| MG | 3.1978941525 | -1.8766813270 | -2.1701292459 |
| MG | 0.6803412591 | 2.4476472084  | -2.2187126483 |
| MG | 2.6383799688 | -1.5606313454 | 0.8729891196  |
| MG | 2.9286666066 | 1.0255606732  | -0.7961577359 |

25

Al11Mg14

|    |               |               |               |
|----|---------------|---------------|---------------|
| AL | -2.5951343427 | -2.2458420647 | -0.4382703290 |
| AL | -1.3455186878 | 2.3365750658  | 0.1587613587  |
| AL | -2.4777260479 | 1.4395753267  | 2.4886676604  |
| AL | -0.1123444388 | -0.1341715677 | -1.1677013329 |
| AL | 0.3178374009  | -2.0750441744 | 3.4377605830  |
| AL | 0.3557786718  | -1.8256931100 | -3.6659145424 |
| AL | -0.1585044309 | 3.0923206292  | -2.1113445610 |
| AL | 0.2218755508  | 0.1600348935  | 1.4309641558  |
| AL | 2.0671924075  | 2.0318584155  | 2.9054626262  |
| AL | 2.5477327626  | -0.4489984882 | 3.2296251003  |
| AL | 2.5734451824  | -0.4694618984 | -3.0572745439 |
| MG | -3.3805377029 | 0.3680253215  | -0.1238950086 |
| MG | -2.2373530673 | -1.3414502145 | 2.3413941238  |
| MG | -2.4287979920 | -0.8598954814 | -2.9357118621 |
| MG | -2.6724927611 | 2.0299924990  | -2.5371453268 |
| MG | -0.9808957480 | -3.5980855183 | -2.1335487252 |
| MG | -0.2995275718 | 0.4927456718  | 4.2157642036  |
| MG | -0.0036106036 | 0.9147055833  | -3.8983802647 |
| MG | -0.3961993769 | 3.2370752102  | 2.7540112954  |
| MG | -0.2189098593 | -3.1046403639 | 0.8594278262  |
| MG | 1.5125662324  | 2.9745918721  | 0.3097694599  |
| MG | 2.5689906948  | -2.5848463171 | 1.5841963407  |
| MG | 1.9081378675  | -2.5984924929 | -1.3427082260 |
| MG | 2.4321089786  | 2.1075058766  | -2.3499342930 |
| MG | 2.8018848817  | 0.1016153261  | 0.0460232814  |

25

Al12Mg13

|    |               |               |               |
|----|---------------|---------------|---------------|
| AL | 1.5830865096  | -1.2648248971 | -2.9914523827 |
| AL | 1.4228917476  | 1.4717786909  | -2.9433451601 |
| AL | -2.7210840463 | -0.1988276943 | -2.6630356438 |
| AL | -1.3161305269 | -3.5006911646 | -0.2388712274 |
| AL | 2.8690817914  | -2.1054113925 | -0.8124392712 |
| AL | -0.1456692395 | -0.6945002257 | -0.9159597425 |
| AL | -1.5172209772 | 3.3743476832  | 0.4706065809  |
| AL | 2.9056799626  | 2.3437221517  | 1.4591987852  |
| AL | 0.0664391303  | 0.8597045945  | 1.1830108882  |
| AL | 0.6163480930  | -1.2477781035 | 3.4028805889  |
| AL | 1.6673341094  | 1.1827521757  | 3.4984234139  |
| AL | -2.4724722754 | 1.8738026084  | 2.4828496289  |
| MG | -0.5681262452 | 0.1523218696  | -4.3075739522 |
| MG | -1.2517312832 | -2.5715178987 | -2.9206966450 |
| MG | -1.2045312433 | 2.1887679483  | -2.1550768713 |
| MG | 1.0314565094  | -3.9608521703 | -1.6877301110 |
| MG | 3.1878487835  | 0.7012673872  | -1.0409504408 |
| MG | 1.1777358720  | 3.1792765559  | -0.5202750158 |
| MG | -3.5149372925 | -2.0096858495 | -0.7681923484 |
| MG | -3.0191922320 | 0.9548303469  | -0.0628059525 |
| MG | 0.9638677740  | -2.9688550375 | 1.1789841023  |
| MG | 2.8272903903  | -0.5603311386 | 1.6447778578  |
| MG | 0.3025876903  | 3.4309167571  | 2.4850193869  |
| MG | -1.8271303590 | -1.2994369523 | 1.8236539516  |
| MG | -1.0634226426 | 0.6692247550  | 4.3989975801  |

25

Al13Mg12

|    |               |               |               |
|----|---------------|---------------|---------------|
| AL | -1.1370054775 | 1.4336781304  | -2.9251044162 |
| AL | 3.1158156912  | -1.0982167603 | -1.3885809449 |
| AL | -1.3653995806 | -1.3023160134 | -3.2393453796 |
| AL | -1.1637507828 | 0.0555046594  | -0.4833609892 |
| AL | -0.7657872036 | 3.6417084392  | -1.5187587741 |
| AL | 1.3444994723  | 1.4690542413  | -1.5960067972 |
| AL | 2.1442007662  | -3.1663765216 | 0.3615974498  |
| AL | -2.5311287176 | -2.5883167439 | -1.0327248561 |
| AL | -2.8422563083 | 1.0593461650  | 2.0909122542  |
| AL | 1.1588678698  | -0.3253393674 | 0.6168440847  |
| AL | 1.6841962180  | 2.4929438489  | 2.2247447127  |

|    |               |               |               |
|----|---------------|---------------|---------------|
| AL | -1.5771263817 | -1.3767295973 | 1.8837171351  |
| AL | 2.6135807861  | 0.2226567787  | 3.1061153208  |
| MG | 1.3193409414  | -0.4805579708 | -3.5295114914 |
| MG | -3.7073461926 | -0.1284514187 | -2.3752743724 |
| MG | 0.5412819598  | -2.8085829435 | -1.8436685935 |
| MG | 3.5680158305  | 1.3218895257  | 0.3303503811  |
| MG | -3.1865947749 | 2.1925337559  | -0.6006678397 |
| MG | -4.1570497494 | -0.7140353887 | 0.4419230345  |
| MG | 4.0028967150  | -1.5023089247 | 1.3766205310  |
| MG | -0.6341921713 | -3.7743433855 | 0.7230617975  |
| MG | 1.6945080671  | 3.8759499946  | -0.1821668212 |
| MG | -0.9920372355 | 3.0240715722  | 1.3589577198  |
| MG | 1.1022651630  | -2.1969541487 | 2.8670732686  |
| MG | -0.2297949046 | 0.6731940733  | 3.3332555855  |

25

Al14Mg11

|    |               |               |               |
|----|---------------|---------------|---------------|
| AL | -3.0107285604 | -2.5555798106 | 0.0417222338  |
| AL | -3.8901010849 | -0.2329104595 | -1.0285289603 |
| AL | -3.8476949544 | 0.0528454482  | 1.8900594616  |
| AL | -1.9912139193 | -1.4728844647 | 3.0431988317  |
| AL | 0.2052373660  | 1.3064696705  | -0.6045384518 |
| AL | -1.3819230838 | -0.4110028298 | 0.4555152661  |
| AL | -1.0603308571 | -0.9664350489 | -2.3439791165 |
| AL | -0.9741348342 | 1.3049112816  | 2.5725742746  |
| AL | 1.1429210132  | 2.6624783653  | -2.9357067454 |
| AL | 1.8913228858  | -3.9357711972 | -1.0011221070 |
| AL | 2.4966561595  | -2.9752800190 | 1.4788747967  |
| AL | 1.8183795987  | 3.6782322524  | -0.3830220929 |
| AL | 1.0538356437  | -1.2001950170 | -0.2691620239 |
| AL | 3.3723181816  | -0.4633255494 | 1.5061154331  |
| MG | -2.7457880015 | 2.2782590376  | 0.3997973843  |
| MG | -0.7831040620 | -3.6747726442 | -1.6003339308 |
| MG | -2.2204759665 | 1.5892958332  | -2.5733036283 |
| MG | -0.3704328092 | 3.7966994370  | 1.3823028844  |
| MG | -0.3907967891 | -3.2309842260 | 1.4238122411  |
| MG | -0.8949034006 | 3.9931280435  | -1.5270611612 |
| MG | 0.8522214901  | -0.8961952109 | 2.9324114941  |
| MG | 1.8931563858  | 1.8487405292  | 1.9585197680  |
| MG | 1.7635426361  | -0.1209893040 | -2.9047376263 |
| MG | 3.7237586366  | -1.7154111361 | -1.1190702174 |
| MG | 3.3482773261  | 1.3406780190  | -0.7943380076 |

25

Al15Mg10

|    |               |               |               |
|----|---------------|---------------|---------------|
| AL | -2.6843191968 | 0.4065568447  | 2.7578346572  |
| AL | -3.1755184953 | 2.0189348618  | -1.8229270636 |
| AL | -2.9793147926 | -0.5461943519 | -2.7409079238 |
| AL | -1.0597954255 | 1.7031170543  | -3.6178483024 |
| AL | -1.2650851764 | -1.9597357027 | 1.5923044505  |
| AL | -0.2037037646 | 0.7120654122  | 1.2775205580  |
| AL | -0.3481288105 | -0.4484504769 | 3.8531150317  |
| AL | -0.2961158268 | 3.2183488554  | -1.3182205509 |
| AL | -0.8277693784 | 0.3912914042  | -1.1939529432 |
| AL | 0.5371022529  | -3.9045152090 | 0.4457430865  |
| AL | 1.3002281054  | -3.0739040543 | -2.1811475298 |
| AL | 1.1083184933  | -1.0607624569 | -0.2649554098 |
| AL | 1.8580867569  | 1.2756169628  | 3.0479051530  |
| AL | 2.0745225919  | 1.6575557542  | -0.1945142687 |
| AL | 3.6974739859  | -0.3689044397 | -1.5135123164 |
| MG | -3.3725723846 | -0.3516643845 | 0.1578656514  |
| MG | -2.3781912624 | 2.5999960199  | 0.8473857744  |
| MG | -1.5013486181 | -2.6311645247 | -1.1911690952 |
| MG | -0.7729860832 | 2.4156827137  | 3.6547242714  |
| MG | -0.3958203376 | -1.3389368389 | -3.6795730778 |
| MG | 0.5368254779  | 3.6457765406  | 1.3505483153  |
| MG | 1.6661401933  | 0.8417220489  | -2.9886842801 |
| MG | 1.5585023996  | -2.1071813609 | 2.4829401521  |
| MG | 3.2790721428  | -2.8976785031 | -0.1459884707 |
| MG | 3.6443951529  | -0.1975691692 | 1.3855151309  |

25

Al16Mg9

|    |               |               |               |
|----|---------------|---------------|---------------|
| AL | -3.3291426913 | 0.4178302819  | -1.7025708449 |
| AL | -0.9434071624 | 2.9412707810  | 1.4143258461  |
| AL | -2.2817017950 | -1.3326670734 | 0.2591749040  |
| AL | -2.8498550541 | -0.4559665477 | 3.2225778526  |



|    |               |               |               |
|----|---------------|---------------|---------------|
| AL | -1.3226998694 | -1.4665026712 | -2.3005133393 |
| AL | -0.5126826594 | 0.9455370598  | -0.8694319500 |
| AL | -0.6837283606 | -3.7028015919 | -0.1638765019 |
| AL | -0.4097635134 | 1.8506336061  | 3.8846926065  |
| AL | 0.7013091409  | 3.6227848029  | -0.6766591848 |
| AL | 1.4671926543  | -2.5131040288 | 2.1795035393  |
| AL | -0.4403243305 | 0.0621681237  | 1.7891048062  |
| AL | 0.8681936241  | -1.1720510612 | -0.1284933617 |
| AL | 1.0733396895  | -0.1772173187 | -3.2422386514 |
| AL | 2.2623230498  | 1.4552347496  | -1.2131247060 |
| AL | 2.9086271428  | -3.1470433198 | 0.0370493711  |
| AL | 3.4158798270  | -0.3376173179 | 1.0634070003  |
| MG | -3.3343570891 | 1.3229242609  | 1.1004696390  |
| MG | -2.1061466578 | 3.0803486757  | -1.3768188735 |
| MG | -1.3103765428 | -2.7600711703 | 2.7062428344  |
| MG | -1.6910312734 | 0.9416842820  | -3.8801828212 |
| MG | 0.4796980490  | 2.7518438572  | -3.2818026844 |
| MG | 1.0805715376  | -3.0876279380 | -2.3258527450 |
| MG | 1.7345695878  | -0.1403875750 | 3.7525244937  |
| MG | 1.7913299185  | 2.0079873793  | 1.5582293007  |
| MG | 3.4321817778  | -1.1071912462 | -1.8057365296 |

25

Al17Mg8

|    |               |               |               |
|----|---------------|---------------|---------------|
| AL | -2.9392212472 | -0.4153566365 | -0.8029835197 |
| AL | -2.8360300245 | 2.1801201229  | 0.2873815215  |
| AL | -1.9363327240 | -2.1979146224 | 1.2531504336  |
| AL | -0.6487912264 | 0.4990050780  | 1.1525695325  |
| AL | -1.6445211721 | -0.9110814884 | -3.2344752213 |
| AL | -1.2021665773 | 1.5060293018  | -1.9675434546 |
| AL | -0.0874086940 | -1.2899297149 | -0.7907756191 |
| AL | 0.9675163556  | 2.6974026511  | 2.0969756581  |
| AL | 0.7970698211  | -1.9868970134 | 1.8582635256  |
| AL | 0.7998058108  | 0.4510463028  | 3.7538347058  |
| AL | 1.2637453219  | 0.9225102549  | -0.6710349545 |
| AL | 2.8417704957  | -1.0847874189 | -1.8169170084 |
| AL | 1.2119238328  | 3.0144867066  | -2.6290167644 |
| AL | 2.1835052529  | -3.1326050713 | -0.2719885492 |
| AL | 2.5357724151  | 3.2125763783  | -0.1059858407 |
| AL | 2.7589360742  | 0.2431154264  | 1.8960628152  |
| AL | 4.0776370908  | 0.9426138552  | -0.3946534362 |
| MG | -3.6226851455 | 0.1372872337  | 2.0457151511  |
| MG | -2.3668662045 | -3.0981061789 | -1.7151839912 |
| MG | -1.6629981438 | 2.3465749174  | 3.0391305525  |
| MG | -1.5646730521 | -0.8704566073 | 3.8035066414  |
| MG | -0.4448913817 | 3.6381280582  | -0.2160236836 |
| MG | -0.2234586578 | -4.2888361983 | -0.0392974737 |
| MG | 1.0750235667  | 0.3010618104  | -3.6059769851 |
| MG | 0.6673382134  | -2.8159891476 | -2.9247340354 |

25

Al18Mg7

|    |               |               |               |
|----|---------------|---------------|---------------|
| AL | -3.5111943245 | -1.7265854965 | 1.3840570287  |
| AL | -3.3681765315 | 0.7268265309  | 2.3445132539  |
| AL | -2.1271938632 | 2.4325901026  | -2.2277177672 |
| AL | -1.4122370037 | -3.2173684107 | 1.5681360331  |
| AL | -1.9702565680 | -0.2277705152 | -3.1655095488 |
| AL | -1.9893131843 | 2.4422298429  | 0.5958432708  |
| AL | 0.4548765687  | -3.6016899820 | -0.4895451888 |
| AL | -0.9982131701 | -0.3008364675 | 1.4309245092  |
| AL | -0.1965639072 | 0.8388475360  | -1.1366445178 |
| AL | 0.1260850819  | 1.0436433855  | -4.2955198534 |
| AL | -1.3826380335 | 2.0493989956  | 3.4186777245  |
| AL | -0.1477850436 | 3.7994620109  | -1.1695029808 |
| AL | 0.8117520791  | -2.1973136084 | 2.4982882882  |
| AL | 0.3474067643  | -1.7433336064 | -2.5966112739 |
| AL | 2.9588355896  | 1.2812772436  | 1.4658405947  |
| AL | 1.2669974849  | -0.8864927421 | 0.0694211107  |
| AL | 3.3598736121  | -1.2885100618 | 1.9308728123  |
| AL | 2.2170162083  | 0.1306664935  | -2.8097576723 |
| MG | -3.4418972668 | 0.3364449608  | -0.6914879018 |
| MG | -2.0905483632 | -2.2472094332 | -1.1190515049 |
| MG | 0.9982421007  | 0.5034646827  | 3.4197758788  |
| MG | 0.6255305945  | 2.9796311199  | 1.5433278981  |
| MG | 3.1328961140  | -3.2600280199 | -0.1882647275 |
| MG | 2.3034818711  | 2.4021579344  | -1.0859712589 |

|         |               |               |               |
|---------|---------------|---------------|---------------|
| MG      | 4.0330241905  | -0.2695044958 | -0.6940952068 |
| 25      |               |               |               |
| Al19Mg6 |               |               |               |
| AL      | -3.0652469393 | -1.7965117135 | -0.4933092230 |
| AL      | -2.3985343851 | -0.3382061170 | 1.8342813991  |
| AL      | -2.2411626596 | 2.5036862137  | 1.7269628245  |
| AL      | -1.6108033573 | 2.1223365257  | -1.0083442910 |
| AL      | -0.6979069510 | 1.6144498410  | 3.9612195581  |
| AL      | 0.4550514363  | -3.7129875854 | -1.3407337642 |
| AL      | -0.8696374808 | -1.4823387223 | -2.4428949102 |
| AL      | -0.2956964562 | -1.4877640326 | 0.3149579620  |
| AL      | -0.8049892731 | 1.2354785734  | -3.6049334602 |
| AL      | -0.3300209470 | -1.2924954370 | 3.2608965785  |
| AL      | 0.0232304427  | 1.0033346231  | 1.2059607724  |
| AL      | 0.9410676736  | 2.9284790441  | -2.2724400497 |
| AL      | 0.7704699865  | -3.5259005305 | 1.9094909110  |
| AL      | 0.7268422190  | 0.3885285562  | -1.2789576264 |
| AL      | 1.9975814316  | 2.1559588066  | 2.9097105625  |
| AL      | 2.5451302182  | -2.5634478617 | 0.2313596905  |
| AL      | 2.2149260467  | -0.5215278543 | 2.2775334210  |
| AL      | 3.0704664239  | 1.2868780961  | -2.6993328869 |
| AL      | 2.5368525516  | 2.2702410383  | 0.0822291872  |
| MG      | -4.1471231605 | 1.0384000977  | 0.0907482078  |
| MG      | -3.2243961529 | 0.2445995427  | -2.6089445621 |
| MG      | -1.8271864405 | -4.1165756797 | 0.2530694920  |
| MG      | 0.1866350319  | 3.7857804050  | 0.6009153816  |
| MG      | 2.1959463906  | -1.5964082047 | -2.5716199356 |
| MG      | 3.8485073508  | -0.1439896249 | -0.3378262390 |

|         |               |               |               |
|---------|---------------|---------------|---------------|
| 25      |               |               |               |
| Al20Mg5 |               |               |               |
| AL      | -3.7894821453 | 1.0298260611  | 0.8145449229  |
| AL      | -3.1770854517 | -0.9422924618 | -1.0348617294 |
| AL      | -2.4789927856 | -3.4871781664 | -0.6783985603 |
| AL      | -2.5661089017 | 3.3242539037  | 0.5523897494  |
| AL      | -0.4147029066 | -0.9668901571 | 2.9388920213  |
| AL      | -1.0368866206 | -0.7873139442 | -3.0696112772 |
| AL      | -0.4001086327 | 3.4231103800  | 2.0954860041  |
| AL      | 0.4760124769  | 1.5069694928  | 3.5749376359  |
| AL      | 0.6730878939  | 0.4311226096  | -1.1647502507 |
| AL      | -1.0327497028 | 0.9150894869  | 1.0490644260  |
| AL      | -0.8672902574 | -3.6725389979 | 1.6262244924  |
| AL      | -0.5611290946 | -1.4764669111 | 0.0131397869  |
| AL      | 0.1642398300  | 1.6917967490  | -3.6549128994 |
| AL      | 1.7796003885  | 1.7385246496  | 1.0451801202  |
| AL      | 1.4962565520  | -2.5182091735 | 1.7119930688  |
| AL      | 2.2559257555  | -0.4998993077 | -3.5984567761 |
| AL      | 2.4772059536  | -0.2032241668 | 3.3896619580  |
| AL      | 2.3362545987  | 2.5135822980  | -2.0302000586 |
| AL      | 3.5261254190  | 0.5049452372  | -0.8761297958 |
| AL      | 2.1389822058  | -1.9631865377 | -0.9672812024 |
| MG      | -2.9694402995 | -1.4240143144 | 1.9780948598  |
| MG      | -2.1697672777 | 1.6807221396  | -1.8098748067 |
| MG      | 0.0413094642  | 3.4880885758  | -0.8049906528 |
| MG      | 0.0940344503  | -3.2688121908 | -2.4151431572 |
| MG      | 4.0047110878  | -1.0380052536 | 1.3149991210  |

|         |               |               |               |
|---------|---------------|---------------|---------------|
| 25      |               |               |               |
| Al21Mg4 |               |               |               |
| AL      | -4.1781333990 | 0.9275743748  | 0.5723222486  |
| AL      | -3.2513592715 | 0.0412729249  | -2.1908268248 |
| AL      | -3.3233373444 | -1.7134402514 | 0.5911928443  |
| AL      | -1.9658696989 | -0.1379739488 | 2.5142564729  |
| AL      | -1.4307590929 | 0.4531735830  | -0.2447764960 |
| AL      | -1.4056815205 | -2.9960245274 | 2.5403492129  |
| AL      | -0.1596021627 | 1.1726553089  | -2.6380941654 |
| AL      | -1.2185648439 | -2.3587060390 | -0.9988120970 |
| AL      | 0.3732410415  | 3.6650536850  | 1.1098727234  |
| AL      | 1.3310073635  | -3.6018440890 | 0.0032179023  |
| AL      | 0.3097870767  | -1.1995073977 | 0.9639257178  |
| AL      | 0.3916049095  | 1.2653577812  | 2.8371366967  |
| AL      | 0.5746794198  | -1.2776296771 | 3.8291485446  |
| AL      | 1.0699204591  | 1.2298740217  | -0.0834673389 |
| AL      | 1.6745414223  | -0.6610098523 | -3.7823888417 |
| AL      | 2.4816835782  | -2.6324459941 | 2.2633265793  |
| AL      | 1.5381000645  | 3.6530282759  | -1.5852399396 |

|    |               |               |               |
|----|---------------|---------------|---------------|
| AL | 2.4565618965  | -1.1631871233 | -0.9422572759 |
| AL | 2.6997639132  | 2.6815131941  | 1.9293015735  |
| AL | 3.1038919857  | 0.0294153597  | 1.4306666281  |
| AL | 2.7840273207  | 1.2841738645  | -2.2864900793 |
| MG | -1.4013538057 | 3.1762371173  | -1.2021003996 |
| MG | -2.2261907830 | 2.6001853190  | 1.7336642082  |
| MG | -1.2756117095 | -1.2873899974 | -3.6559461886 |
| MG | 1.0476511810  | -3.1503559128 | -2.7079817056 |

25

Al22Mg3

|    |               |               |               |
|----|---------------|---------------|---------------|
| AL | -0.4770820867 | -0.5088605316 | -4.0298071200 |
| AL | 1.9678154978  | -0.1607446861 | -2.9942913967 |
| AL | -3.1547351656 | -0.9190320428 | -2.9126076596 |
| AL | 3.9112829804  | -1.2644227159 | -1.0621632085 |
| AL | -1.6981469786 | 2.5689108864  | -1.7668945638 |
| AL | -0.6756692077 | -0.0518947567 | -1.3356815855 |
| AL | 0.9301587608  | 2.1968455433  | -1.9702359417 |
| AL | -1.3460638980 | -2.7965829419 | -1.8670333015 |
| AL | 1.2516140011  | -2.2799315352 | -1.4204303948 |
| AL | -3.2985490745 | 0.5269141338  | -0.6152886249 |
| AL | -0.1235297994 | 4.6027072600  | 0.3235223313  |
| AL | 0.0227275460  | 1.5842718307  | 0.6281640403  |
| AL | 2.4513169080  | 0.2529261016  | 1.0005964967  |
| AL | 0.0550482202  | -1.3380382116 | 0.8472684152  |
| AL | -0.5402218943 | -4.3288650645 | 0.8904444169  |
| AL | -2.6793461163 | -1.9815261863 | 0.4414028223  |
| AL | 2.2737438168  | 3.0954603721  | 0.4343156129  |
| AL | 1.1084512696  | -2.3027599836 | 3.3201546473  |
| AL | -2.1885821038 | 0.3750632142  | 2.1288476018  |
| AL | -0.7682436986 | 2.7208921783  | 3.0866664157  |
| AL | 0.6885080847  | 0.4341954495  | 3.1921843276  |
| AL | -1.6254246735 | -2.2355756425 | 2.9701627911  |
| MG | 3.7939438550  | 1.5342497637  | -1.3427997630 |
| MG | 2.7117761480  | -2.7084586087 | 1.0809561523  |
| MG | -2.5907933913 | 2.9842591741  | 0.9725484885  |

25

Al23Mg2

|    |               |               |               |
|----|---------------|---------------|---------------|
| AL | -3.7518218877 | -0.2990490531 | 1.0972092659  |
| AL | -3.2016526373 | -3.0276265516 | 0.9375111363  |
| AL | -2.2978615703 | 0.4102957460  | -1.3088797749 |
| AL | -1.7412217535 | 3.1014114710  | -1.8075920178 |
| AL | -0.8405171989 | -1.5020992481 | -4.0822080285 |
| AL | -1.2867887396 | 1.5101301317  | 2.1341924872  |
| AL | -0.6978696645 | -3.6856671917 | 1.4998950632  |
| AL | -2.2986308441 | -2.3215275163 | -1.6628115156 |
| AL | -1.1172201351 | -1.0215943392 | 0.8884965822  |
| AL | -0.3900756960 | -0.4664383279 | 3.7249736890  |
| AL | 0.3649334700  | -3.2712451244 | -0.9984684271 |
| AL | 0.2609076413  | -0.5188668127 | -1.3672137664 |
| AL | -0.4480576799 | 1.3844173116  | -3.3649226369 |
| AL | 1.3039984144  | 2.9499493664  | 2.0227844686  |
| AL | 0.9530509363  | 2.1891512596  | -0.9548941965 |
| AL | 1.8635223491  | -2.2008657017 | -3.0270540239 |
| AL | 1.1266503253  | 0.3692370536  | 1.1302120250  |
| AL | 1.3593150686  | -2.1251767345 | 2.3818993704  |
| AL | 2.9854564988  | -0.8208931216 | -0.8427346427 |
| AL | 2.8098245574  | 1.0958310017  | 3.7442760796  |
| AL | 2.1780701276  | 0.6312643560  | -3.3090769325 |
| AL | 3.5555087498  | 1.8850666676  | 0.3741237094  |
| AL | 3.6196217274  | -0.7337483483 | 1.7597366052  |
| MG | -3.5071715360 | 2.4238601317  | 0.3756926051  |
| MG | -0.8019705231 | 4.0441845741  | 0.6548548755  |

25

Al24Mg1

|    |               |               |               |
|----|---------------|---------------|---------------|
| AL | 2.3676317586  | 0.6009706938  | -3.7283518700 |
| AL | -0.2874114402 | 0.6888681458  | -3.9403036425 |
| AL | 1.7002950461  | -2.2792483945 | -3.5133236612 |
| AL | 3.9144482011  | -0.3157074675 | -1.7733972157 |
| AL | -1.3556676044 | 2.1599680771  | -1.8721005627 |
| AL | -1.7734670964 | -1.1188310400 | -2.6316274023 |
| AL | 1.4584058825  | 2.5442359188  | -1.9372876882 |
| AL | 0.8661831440  | -0.2720776420 | -1.4266734434 |
| AL | -3.0508144737 | 0.6527667746  | -0.2813686652 |
| AL | 2.6977950764  | -2.4725779287 | -0.7458583938 |

|    |               |               |               |
|----|---------------|---------------|---------------|
| AL | -0.1062686754 | -2.8482131154 | -1.1458363181 |
| AL | -3.3821263847 | -2.1479196738 | -0.5866881233 |
| AL | -2.1765561776 | 3.3077777631  | 0.4637956317  |
| AL | 2.6795762366  | 0.3370030704  | 0.6311700976  |
| AL | -0.0361009967 | 1.3285246142  | 0.5017463013  |
| AL | -1.6595135579 | -3.7137654494 | 0.8743386129  |
| AL | -1.1350981005 | -1.0332820290 | 0.8757737107  |
| AL | 1.5744834623  | -2.4679994388 | 1.6191269257  |
| AL | -2.2287297682 | 1.1464633286  | 2.3461543417  |
| AL | -0.4848852736 | -2.6313272726 | 3.1801491094  |
| AL | 2.0474278251  | 2.2855427238  | 2.2617487617  |
| AL | -2.4345493787 | -0.9584253476 | 4.1242153963  |
| AL | -0.3408539054 | 3.1438945115  | 3.4156013261  |
| MG | 0.5704414327  | 0.0228228394  | 2.9327169452  |
| MG | 0.5753547683  | 4.0405383381  | 0.3562818260  |

25

Al25Mg0

|    |               |               |               |
|----|---------------|---------------|---------------|
| AL | -4.0810915084 | -0.6332107015 | 1.0479141120  |
| AL | -3.6203698724 | -0.1867175869 | -2.1474968815 |
| AL | -2.7795242850 | -2.7782477897 | -1.5727731750 |
| AL | -2.7225655591 | 1.7026757270  | 0.6627436843  |
| AL | -2.6076087304 | -3.0568468722 | 1.3119615221  |
| AL | -1.8093505759 | -0.0880205655 | 2.8063660030  |
| AL | -1.4874404066 | -0.6862562516 | -0.1244547433 |
| AL | -1.2866212966 | 3.5221115858  | 2.6117521819  |
| AL | -1.0769021972 | 3.4775050116  | -0.6126323001 |
| AL | -0.6613474689 | -1.2350451402 | -2.8375382431 |
| AL | -1.3232794157 | 1.3691083559  | -2.3211817838 |
| AL | -0.1402960633 | -3.3884828249 | -0.8420095723 |
| AL | 0.1596104526  | 1.2429292691  | 1.1874879453  |
| AL | -0.0844282655 | -2.0904003595 | 1.9549118653  |
| AL | 0.6685926727  | 0.4392589501  | 4.0423474432  |
| AL | 1.0766332469  | 3.8243196650  | 0.8649165312  |
| AL | 1.1139836780  | -0.6196061649 | -0.6941035228 |
| AL | 1.4494007845  | 2.0671768314  | -1.2872586822 |
| AL | 1.8709192235  | -2.5863796133 | -2.9883885987 |
| AL | 1.6431702661  | 0.4174741878  | -3.4375719785 |
| AL | 2.1529329047  | -3.1225946847 | 0.6685150441  |
| AL | 3.7575782543  | 3.5343591551  | 0.6937122416  |
| AL | 2.3148987391  | -0.4067818905 | 1.9595123858  |
| AL | 3.8162988271  | 0.8736448101  | -0.0491320464 |
| AL | 3.6568045953  | -1.5919741033 | -0.8976014320 |

30

Al0Mg30

|    |               |               |               |
|----|---------------|---------------|---------------|
| MG | -0.1505927223 | 0.7444940545  | -3.7981051427 |
| MG | -0.7644253943 | -2.2769868489 | -3.6211939901 |
| MG | 2.1761994176  | -1.0587620711 | -3.0605198116 |
| MG | 1.4885872870  | -4.0371857560 | -2.6274019069 |
| MG | -2.0586924990 | 3.0539962185  | -2.9747619121 |
| MG | 2.1753029500  | 1.9413739938  | -2.3799019746 |
| MG | -4.1559684661 | 2.1582875700  | -1.0052970897 |
| MG | -2.9825921732 | 0.0686905825  | -2.9896950539 |
| MG | 0.0388581426  | -1.4521949066 | -0.6974017145 |
| MG | -1.1255963647 | -4.6895036541 | -1.4803827310 |
| MG | 0.4642150634  | 4.2586621371  | -1.3073988421 |
| MG | 3.4598249949  | -2.8652075221 | -0.8629800904 |
| MG | 3.0864934621  | 0.0423435265  | -0.3373282263 |
| MG | -2.3608320419 | 4.3857247294  | -0.2577088830 |
| MG | -0.6308166416 | 1.4238206436  | -0.7571402422 |
| MG | -3.2237974654 | -2.7203084710 | -1.7686566207 |
| MG | 2.5210273128  | 2.8767032879  | 0.5187523397  |
| MG | -2.7337491759 | 2.0535492052  | 1.8057289972  |
| MG | -3.0719190799 | -0.4409405374 | 0.1449027843  |
| MG | 1.0328403943  | -4.1650444241 | 0.5787858016  |
| MG | 0.5614137014  | 0.3440742319  | 1.5993107217  |
| MG | 3.0615884729  | -2.0527789630 | 2.0551185366  |
| MG | -1.9916688261 | -3.1741037320 | 1.0651526679  |
| MG | -0.1569902325 | 3.7182990401  | 1.7551793880  |
| MG | 4.0345354852  | 0.8787699004  | 2.4298986959  |
| MG | -0.7031216719 | 1.6480131069  | 4.0891655449  |
| MG | -2.2355455925 | -0.7533512343 | 2.9393001301  |
| MG | 0.2221606858  | -2.4399998504 | 3.0123496542  |
| MG | 2.0693973431  | 2.7412790686  | 3.6148917122  |
| MG | 1.9538646341  | -0.2117133258 | 4.3173342577  |

30

Al5Mg25

|    |               |               |               |
|----|---------------|---------------|---------------|
| AL | -2.7675365860 | -0.4295522163 | -0.0642388699 |
| AL | -0.3577006492 | 0.3350511193  | 1.5394650594  |
| AL | 0.0808009446  | 1.5084028897  | -0.9139333937 |
| AL | -1.6319006701 | -0.0009359577 | -2.7049601853 |
| AL | 0.2029381427  | -1.3328996641 | -0.5297328656 |
| MG | -2.6718880989 | -2.5573418008 | -2.1567577430 |
| MG | -3.4101360070 | -1.2761110429 | 2.6724850853  |
| MG | -3.0528869468 | 1.6651865724  | 2.1498445801  |
| MG | -2.9232422788 | 2.2494567614  | -1.0804119190 |
| MG | -2.1337797837 | -3.1995751386 | 0.7328069016  |
| MG | -1.8487033957 | 0.2296258132  | 4.6048065733  |
| MG | -1.3536791746 | 2.4895551720  | -3.8747781929 |
| MG | -0.6850159455 | -4.5621513411 | -1.6290807327 |
| MG | -1.0766694496 | 4.5155786689  | -1.7991491446 |
| MG | -0.9698014460 | 3.4980487549  | 1.0290832806  |
| MG | -0.4908625723 | -2.2292330128 | 3.1873813138  |
| MG | -0.4367093799 | 2.6360024010  | 3.8551100040  |
| MG | 0.1948300171  | -2.2256416234 | -3.4320074774 |
| MG | 0.8528606078  | -3.8744961017 | 0.9369170750  |
| MG | 1.4350095284  | 3.5929308165  | -3.2462734465 |
| MG | 1.2167772536  | 0.1616157482  | 4.1600951095  |
| MG | 1.1950829908  | 0.6749697050  | -3.6811268707 |
| MG | 1.6408420770  | 4.3450651950  | -0.4212148563 |
| MG | 1.8749377990  | 2.5192799434  | 1.9151297246  |
| MG | 2.1851523447  | -4.0508809439 | -1.9561830852 |
| MG | 2.5548170958  | -2.2901764803 | 3.0341987660  |
| MG | 3.0372277951  | 1.8513941129  | -1.3542916618 |
| MG | 3.7159364559  | -2.9277769344 | 0.2989996169  |
| MG | 2.9572047439  | -1.1617781308 | -2.1329491982 |
| MG | 2.6660955878  | -0.1536122852 | 0.8607665527  |

30

Al10Mg20

|    |               |               |               |
|----|---------------|---------------|---------------|
| AL | -4.0728637890 | 0.2167660072  | -0.2569464023 |
| AL | -2.3742644989 | -0.7127573583 | 1.7292310449  |
| AL | -1.2919078987 | 0.2765624676  | -0.9480275683 |
| AL | 0.0467085756  | 1.0698016599  | 1.2483180558  |
| AL | -1.4269769204 | 0.4775440152  | -3.7625336362 |
| AL | -0.9418429416 | 3.6515370913  | -0.5285522418 |
| AL | 0.0686647022  | -1.6633773836 | 0.5975075940  |
| AL | 1.6422762527  | -2.7123422324 | -1.9225365550 |
| AL | 2.3812288803  | 2.3583275968  | 2.1725549101  |
| AL | 1.4804678565  | 0.0088649145  | -0.8839116029 |
| MG | -2.9200910751 | -2.6124962856 | -0.3704325313 |
| MG | -1.8972812137 | 1.4374095914  | 3.7042451021  |
| MG | -3.6921309124 | -0.7511813385 | -2.7774771305 |
| MG | -2.8661376337 | 2.4010823784  | 1.0369755402  |
| MG | -2.9243795560 | 2.3119355293  | -2.1088153761 |
| MG | -1.7093638652 | -3.5942642986 | 2.2402879381  |
| MG | -0.3860042580 | -1.2952740840 | 3.7731114125  |
| MG | -0.9770508119 | -2.1917442096 | -2.6339021252 |
| MG | -0.2842144968 | -4.3159566993 | -0.3420444677 |
| MG | -0.1730017160 | 3.7227291290  | 2.2489421345  |
| MG | 0.3137866013  | 2.4233410765  | -2.7955011087 |
| MG | 1.2286999172  | -3.5534640803 | 2.5094419385  |
| MG | 0.8833999914  | 1.4680508695  | 4.3200208495  |
| MG | 2.2837161630  | -0.5718245746 | 2.3991366919  |
| MG | 1.3418758557  | -0.3504586521 | -3.8185152503 |
| MG | 1.9090124516  | 3.2848148450  | -0.4070781340 |
| MG | 3.1664382868  | -2.5527843606 | 0.4058976664  |
| MG | 3.3219167028  | 1.8185551054  | -2.7306078972 |
| MG | 3.9327368504  | -1.0217823012 | -2.2622956436 |
| MG | 3.9365805000  | 0.9723865817  | 0.1635037926  |

30

Al15Mg15

|    |               |               |               |
|----|---------------|---------------|---------------|
| AL | 0.9479177324  | -1.7931556760 | -3.2606297687 |
| AL | 0.3875158130  | 0.3090021454  | -1.4638235391 |
| AL | -2.1916518143 | 1.3292772982  | -1.8520476136 |
| AL | -1.3727741441 | -1.9183405101 | -1.7237117130 |
| AL | 3.1307907483  | -0.5869763016 | -1.5554598987 |
| AL | -1.5490771248 | -3.8588030798 | 0.3771828377  |
| AL | -0.4427459460 | 3.2996147321  | -0.6564557869 |
| AL | 0.1314888232  | -1.4472493936 | 0.6423727205  |

|    |               |               |               |
|----|---------------|---------------|---------------|
| AL | 2.1364164728  | 0.4690171235  | 0.9045422983  |
| AL | -0.8379554552 | 0.9410220916  | 0.8370408253  |
| AL | -2.5144385828 | -1.5889517933 | 1.6747038272  |
| AL | 2.9064831025  | -2.2029634784 | 0.8326258762  |
| AL | -0.9520009608 | 3.3903272907  | 2.1607648419  |
| AL | -0.5399031847 | -1.0813994732 | 3.3815703809  |
| AL | 4.1763185048  | 0.5167050078  | 3.0245659199  |
| MG | 2.0961026139  | 0.6560526238  | -3.9704505402 |
| MG | -1.2925878527 | -0.1900660871 | -4.2013415349 |
| MG | -3.9220815552 | -0.9494843535 | -3.0860500889 |
| MG | 0.0007515843  | 2.6179955315  | -3.3610483174 |
| MG | 2.4863075174  | 2.4114484100  | -1.5051774299 |
| MG | 1.1563550407  | -3.5437632282 | -1.0049791838 |
| MG | -3.9901522859 | -2.8309734812 | -0.7281425990 |
| MG | -4.0603412030 | 0.1088453727  | -0.0069330243 |
| MG | 4.5038555272  | 2.2271158355  | 0.8394105725  |
| MG | -3.2052074125 | 2.9449950566  | 0.4694997316  |
| MG | 1.7724310408  | 3.4524540289  | 1.2756229785  |
| MG | 0.7351024590  | -3.7541056603 | 2.2102550940  |
| MG | -2.8124274585 | 1.0694046281  | 2.8069916850  |
| MG | 2.3003318295  | -1.4268168735 | 3.5672618841  |
| MG | 0.8151761708  | 1.4297732134  | 3.3718405648  |

30

Al20Mg10

|    |               |               |               |
|----|---------------|---------------|---------------|
| AL | -4.2234740171 | -0.2719667766 | 2.0064859110  |
| AL | -2.4655538919 | -2.3893984612 | 1.1308797473  |
| AL | -3.2688324718 | 1.7107101419  | -2.2851556465 |
| AL | -1.6759256718 | -2.7162239292 | -1.5873924547 |
| AL | -2.4089973036 | -0.1307116777 | -0.3291333615 |
| AL | 0.1196141872  | 3.3858213491  | 1.9664560430  |
| AL | -1.4289085994 | 1.0658850511  | 2.4206613750  |
| AL | -0.6269705848 | 2.1382379423  | -2.1992754899 |
| AL | 1.1041801017  | -0.1654645697 | -1.9268250180 |
| AL | -0.1779312506 | -2.5144334955 | 2.8029035105  |
| AL | 0.0258164594  | -1.3649717719 | 0.2297085024  |
| AL | 1.2906245727  | -3.1318291383 | -1.5601005976 |
| AL | 0.5555775170  | 1.1611898720  | 0.3989314189  |
| AL | -0.1152535492 | -0.3626070105 | 4.7759409853  |
| AL | 3.0699388463  | 1.8749942273  | 1.7765587923  |
| AL | 3.7649592934  | 0.3071131298  | -3.4035688455 |
| AL | 1.6080701874  | -0.5373583568 | 2.4332236399  |
| AL | 1.9091270843  | 2.3492688019  | -3.0974664742 |
| AL | 3.1792136123  | -1.0074284248 | 0.1466842032  |
| AL | 3.4552433614  | 1.5041914796  | -0.9111678550 |
| MG | -4.7486400166 | 1.5462026996  | 0.0533366447  |
| MG | -2.0422035625 | 2.9652638423  | 0.1525300549  |
| MG | -2.6230144140 | -1.1383152265 | 4.0184356012  |
| MG | -0.5086157556 | -4.3769657665 | 0.4710104950  |
| MG | -1.6380468177 | -0.5147783162 | -3.3701294193 |
| MG | 1.3182271958  | 1.8630465648  | 4.0379131249  |
| MG | 0.9106414991  | 0.4679146759  | -4.9872129300 |
| MG | 2.1086184155  | -3.3698043504 | 1.2659067920  |
| MG | 1.3974161637  | 3.6508265851  | -0.5252524836 |
| MG | 2.1330984091  | -1.9984130910 | -3.9048892661 |

30

Al25Mg5

|    |               |               |               |
|----|---------------|---------------|---------------|
| AL | -3.6396382219 | -1.8915779094 | -0.1295282811 |
| AL | -2.4793087849 | 0.5125336167  | 3.5513853143  |
| AL | -2.4075077389 | 2.5554102281  | 1.8336428209  |
| AL | -3.1505464989 | 0.0220473430  | -1.9694622813 |
| AL | -3.1304979175 | -1.9123470842 | 2.5588308786  |
| AL | -1.7212603253 | 0.2207606118  | 0.3427499048  |
| AL | -0.5018100559 | -0.7699121662 | 4.8356705131  |
| AL | -1.6866081924 | 2.4508486166  | -3.0254948196 |
| AL | -0.1083403946 | -0.9496305158 | 2.0548101661  |
| AL | -1.5468680724 | -2.3963543959 | -1.7656179215 |
| AL | -0.8568382086 | -3.1252728457 | 3.6535851685  |
| AL | 0.3771722838  | 1.8337700549  | -4.5141847713 |
| AL | 0.6256553234  | -2.7856531690 | -3.2706071644 |
| AL | 0.3744215258  | 2.5230524087  | 2.1855569634  |
| AL | 1.1395046251  | -3.3693349465 | -0.6510111829 |
| AL | -0.2794317615 | 0.0396090250  | -2.3254039996 |
| AL | 1.2313473308  | -3.5767641642 | 2.0176250318  |
| AL | 2.0840307174  | 3.3736775143  | 0.2882971632  |

|    |               |               |               |
|----|---------------|---------------|---------------|
| AL | 0.9658067259  | 0.6699411847  | 0.0619403011  |
| AL | 1.4738572806  | 0.6382849201  | 3.8909951552  |
| AL | 1.6080892594  | 2.7772812754  | -2.2704299567 |
| AL | 2.3066261138  | -1.0139184836 | -1.6567281658 |
| AL | 3.4851088935  | 0.9247618206  | -3.3317625288 |
| AL | 4.0033384213  | 1.5249469741  | -0.7947892023 |
| AL | 2.4934921189  | -1.3051303987 | 1.3688715306  |
| MG | -3.5607486774 | 2.5330236514  | -0.7150544321 |
| MG | -1.4120247951 | -3.5321184741 | 0.8419064908  |
| MG | -0.7041175251 | 3.2792006050  | -0.4034948453 |
| MG | 1.6255813109  | -0.6739328939 | -4.6825907270 |
| MG | 3.3915152398  | 1.4227965969  | 2.0202938772  |

30

AL30Mg0

|    |               |               |               |
|----|---------------|---------------|---------------|
| AL | -3.5787585383 | -0.2424564029 | -1.1662951756 |
| AL | -4.4072018716 | -1.1181023143 | 1.3014193584  |
| AL | -3.8805520381 | 1.1327767732  | 2.4550364539  |
| AL | -2.0586136284 | -1.1679162287 | -3.1320028484 |
| AL | -2.8390945290 | -3.2009002276 | 1.0759962648  |
| AL | -2.9870628619 | 2.3016118608  | 0.1374674689  |
| AL | -1.0014439883 | 0.9238730140  | -1.3401294639 |
| AL | -1.6671479691 | -0.2467701411 | 1.2501848891  |
| AL | -0.4097481673 | -3.3885262536 | -3.1471037333 |
| AL | 0.2696825786  | -0.1233423153 | 3.1976565714  |
| AL | -1.6640902071 | 1.8154461300  | 3.6648316577  |
| AL | -0.2938560462 | -2.5166423226 | 1.9570425957  |
| AL | 0.1934461409  | 0.1268808137  | -3.8310777882 |
| AL | -0.3196474765 | -1.7080807066 | -0.7858426741 |
| AL | -1.6700201307 | -4.3419346111 | -1.0600960945 |
| AL | 0.2137553984  | 3.6443290402  | 3.0727492454  |
| AL | -0.9016359942 | 3.7716512546  | -0.5863258310 |
| AL | 0.4622954564  | 1.6116910426  | 0.9213507888  |
| AL | 0.8281346438  | 2.8509025651  | -2.4297790295 |
| AL | 1.7396775382  | 0.1846181791  | -1.1612746297 |
| AL | 2.3605391056  | -2.1885818708 | 3.1749766769  |
| AL | 2.3369703416  | 1.8827224963  | 3.2664174204  |
| AL | 2.1074902220  | -2.5628613741 | -2.7672705364 |
| AL | 0.8564748967  | -4.3514907923 | 0.0674512635  |
| AL | 1.3932495081  | 4.3546527666  | 0.8432008025  |
| AL | 2.8789415323  | -0.2294883319 | -3.7320251147 |
| AL | 3.3375426122  | 2.7388547166  | -0.0397183394 |
| AL | 3.3981606581  | 2.0062473907  | -2.5743696827 |
| AL | 2.3751525789  | -2.1561769508 | 0.0792985634  |
| AL | 2.9273612347  | 0.1970108000  | 1.2882319206  |
